# Supplementary material for: Comprehensive Analysis of Differentially Expressed CircRNAs in the Ovaries of Low- and High-Fertility Sheep
Source: Animals (Basel). 2023 Jan 9;13(2):236. doi: 10.3390/ani13020236 (PMC9854751; doi:10.3390/ani13020236)
Supplement: Supplementary file 1 [file animals-13-00236-s001.zip]

Archive with 9 entries (9 files):
- Supplementary Figure.pdf
- Supplementary table S1.xlsx
- Supplementary table S2.xlsx
- Supplementary table S3.xlsx
- Supplementary table S4.xlsx
- Supplementary table S5.xlsx
- Supplementary table S6.xlsx
- Supplementary table S7.xlsx
- Supplementary table S8.xlsx
