# Supplementary material for: Comprehensive Analysis of Differentially Expressed CircRNAs in the Ovaries of Low- and High-Fertility Sheep
Source: Animals (Basel). 2023 Jan 9;13(2):236. doi: 10.3390/ani13020236 (PMC9854751; doi:10.3390/ani13020236)
Supplement: Supplementary file 1 [file animals-13-00236-s001.zip › Supplementary table S1.xlsx]

## Sheet: Sheet1
Biotin-labeled miR-125b probe
Positive probe sequences	Negative probe sequences
5' biotin UCCCUGAGACCCUAACUUGUG 3'	5' biotin CACAAGUUAGGGUCUCAGGGA 3'
