# Supplementary material for: Comprehensive Analysis of Differentially Expressed CircRNAs in the Ovaries of Low- and High-Fertility Sheep
Source: Animals (Basel). 2023 Jan 9;13(2):236. doi: 10.3390/ani13020236 (PMC9854751; doi:10.3390/ani13020236)
Supplement: Supplementary file 1 [file animals-13-00236-s001.zip › Supplementary table S2.xlsx]

## Sheet: Sheet1
circRNA_ID	chr	Gene_Name
novel_circ_0039860	JH922019.1	TMEM185A
novel_circ_0039884	X	GRIA3
novel_circ_0039893	X	STAG2
novel_circ_0039894	X	STAG2
novel_circ_0039895	X	STAG2
novel_circ_0039897	X	STAG2
novel_circ_0039899	X	STAG2
novel_circ_0039900	X	STAG2
novel_circ_0039901	X	STAG2
novel_circ_0039902	X	DHRSX
novel_circ_0039906	X	TENM1
novel_circ_0039907	X	TENM1
novel_circ_0039908	X	TENM1
novel_circ_0039945	X	OCRL
novel_circ_0039946	X	OCRL
novel_circ_0039947	X	OCRL
novel_circ_0039948	X	ZDHHC9
novel_circ_0039951	X	BCORL1
novel_circ_0039952	X	ELF4
novel_circ_0039955	X	ZNF280C
novel_circ_0039956	X	ZNF280C
novel_circ_0039965	X	SLC25A14
novel_circ_0039966	X	SLC25A14
novel_circ_0039967	X	SLC25A14
novel_circ_0039968	X	SLC25A14
novel_circ_0039969	X	SLC25A14
novel_circ_0039978	X	ENOX2
novel_circ_0039979	X	ENOX2
novel_circ_0039981	X	SEPT6
novel_circ_0039982	X	SEPT6
novel_circ_0039984	X	SLC25A43
novel_circ_0039985	X	KIAA1210
novel_circ_0039986	X	KIAA1210
novel_circ_0039987	X	LONRF3
novel_circ_0039996	X	IL13RA1
novel_circ_0039998	X	IL13RA1
novel_circ_0039999	X	IL13RA1
novel_circ_0040022	X	DOCK11
novel_circ_0040024	X	DOCK11
novel_circ_0040026	X	DOCK11
novel_circ_0040029	X	DOCK11
novel_circ_0040030	X	DOCK11
novel_circ_0040031	X	DOCK11
novel_circ_0040032	X	WDR44
novel_circ_0040033	X	WDR44
novel_circ_0040034	X	WDR44
novel_circ_0040036	X	WDR44
novel_circ_0040039	X	WDR44
novel_circ_0040040	X	WDR44
novel_circ_0040041	X	WDR44
novel_circ_0040042	X	WDR44
novel_circ_0040043	X	WDR44
novel_circ_0040044	X	WDR44
novel_circ_0040045	X	WDR44
novel_circ_0040051	X	KLHL13
novel_circ_0040052	X	KLHL13
novel_circ_0040057	X	OFD1
novel_circ_0040058	X	OFD1
novel_circ_0040059	X	OFD1
novel_circ_0040061	X	OFD1
novel_circ_0040062	X	OFD1
novel_circ_0040063	X	OFD1
novel_circ_0040064	X	GPM6B
novel_circ_0040065	X	PLS3
novel_circ_0040067	X	PLS3
novel_circ_0040068	X	PLS3
novel_circ_0040069	X	PLS3
novel_circ_0040070	X	PLS3
novel_circ_0040071	X	PLS3
novel_circ_0040072	X	PLS3
novel_circ_0040074	X	PLS3
novel_circ_0040075	X	LRCH2
novel_circ_0040076	X	LRCH2
novel_circ_0040077	X	LRCH2
novel_circ_0040078	X	LRCH2
novel_circ_0040079	X	LRCH2
novel_circ_0040080	X	LRCH2
novel_circ_0040085	X	LRCH2
novel_circ_0040086	X	LRCH2
novel_circ_0040088	X	KLHL4
novel_circ_0040089	X	KLHL4
novel_circ_0040090	X	KLHL4
novel_circ_0040091	X	KLHL4
novel_circ_0040092	X	KLHL4
novel_circ_0040094	X	KLHL4
novel_circ_0040097	X	AMOT
novel_circ_0040098	X	AMOT
novel_circ_0040099	X	AMOT
novel_circ_0040100	X	AMOT
novel_circ_0040101	X	AMOT
novel_circ_0040102	X	AMOT
novel_circ_0040103	X	ALG13
novel_circ_0040106	X	ALG13
novel_circ_0040107	X	ALG13
novel_circ_0040109	X	ALG13
novel_circ_0040110	X	ALG13
novel_circ_0040115	X	PAK3
novel_circ_0040116	X	PAK3
novel_circ_0040117	X	PAK3
novel_circ_0040121	X	AMMECR1
novel_circ_0040124	X	AMMECR1
novel_circ_0040128	X	TMEM164
novel_circ_0040142	X	ACSL4
novel_circ_0040144	X	ACSL4
novel_circ_0040145	X	ACSL4
novel_circ_0040146	X	ACSL4
novel_circ_0040148	X	COL4A5
novel_circ_0040149	X	COL4A5
novel_circ_0040152	X	COL4A6
novel_circ_0040153	X	ATG4A
novel_circ_0040155	X	MID2
novel_circ_0040156	X	MID2
novel_circ_0040159	X	MID2
novel_circ_0040160	X	FRMPD3
novel_circ_0040161	X	FRMPD3
novel_circ_0040171	X	MORC4
novel_circ_0040172	X	MORC4
novel_circ_0040173	X	MORC4
novel_circ_0040174	X	MORC4
novel_circ_0040175	X	MORC4
novel_circ_0040176	X	MORC4
novel_circ_0040177	X	TBC1D8B
novel_circ_0040178	X	TBC1D8B
novel_circ_0040179	X	TBC1D8B
novel_circ_0040180	X	TBC1D8B
novel_circ_0040181	X	TBC1D8B
novel_circ_0040182	X	TBC1D8B
novel_circ_0040183	X	RNF128
novel_circ_0040184	X	RNF128
novel_circ_0040185	X	RNF128
novel_circ_0040186	X	RNF128
novel_circ_0040187	X	RNF128
novel_circ_0040188	X	GLRA2
novel_circ_0040193	X	FAM199X
novel_circ_0040194	X	FAM199X
novel_circ_0040205	X	NRK
novel_circ_0040213	X	SYTL4
novel_circ_0040214	X	SYTL4
novel_circ_0040216	X	SYTL4
novel_circ_0040217	X	SYTL4
novel_circ_0040218	X	SYTL4
novel_circ_0040219	X	SYTL4
novel_circ_0040225	X	TRMT2B
novel_circ_0040226	X	TRMT2B
novel_circ_0040231	X	CENPI
novel_circ_0040233	X	CENPI
novel_circ_0040234	X	CENPI
novel_circ_0040236	X	CENPI
novel_circ_0040237	X	BTK
novel_circ_0040240	X	SRPX2
novel_circ_0040241	X	SRPX2
novel_circ_0040242	X	PCDH19
novel_circ_0040243	X	GYG2
novel_circ_0040244	X	GYG2
novel_circ_0040245	X	ASB11
novel_circ_0040246	X	GYG2
novel_circ_0040251	X	BMX
novel_circ_0040254	X	DIAPH2
novel_circ_0040257	X	ARSD
novel_circ_0040258	X	DIAPH2
novel_circ_0040262	X	DIAPH2
novel_circ_0040266	X	ARSD
novel_circ_0040267	X	ARSD
novel_circ_0040269	X	ARSD
novel_circ_0040270	X	DIAPH2
novel_circ_0040272	X	DIAPH2
novel_circ_0040275	X	DIAPH2
novel_circ_0040276	X	ARSD
novel_circ_0040293	X	ARSD
novel_circ_0040294	X	ARSE
novel_circ_0040295	X	ARSE
novel_circ_0040296	X	ARSE
novel_circ_0040300	X	ARSE
novel_circ_0040304	X	AP1S2
novel_circ_0040310	X	CTPS2
novel_circ_0040314	X	CTPS2
novel_circ_0040315	X	CTPS2
novel_circ_0040317	X	CTPS2
novel_circ_0040320	X	TXLNG
novel_circ_0040324	X	REPS2
novel_circ_0040325	X	REPS2
novel_circ_0040327	X	REPS2
novel_circ_0040335	X	REPS2
novel_circ_0040336	X	REPS2
novel_circ_0040339	X	REPS2
novel_circ_0040340	X	MXRA5
novel_circ_0040345	X	NHS
novel_circ_0040357	X	SCML2
novel_circ_0040358	X	SCML2
novel_circ_0040359	X	SCML2
novel_circ_0040360	X	SCML2
novel_circ_0040365	X	SCML2
novel_circ_0040367	X	PRKX
novel_circ_0040368	X	PRKX
novel_circ_0040369	X	PRKX
novel_circ_0040370	X	PRKX
novel_circ_0040372	X	PRKX
novel_circ_0040373	X	PRKX
novel_circ_0040376	X	PPEF1
novel_circ_0040377	X	PRKX
novel_circ_0040378	X	PRKX
novel_circ_0040384	X	SH3KBP1
novel_circ_0040387	X	SH3KBP1
novel_circ_0040388	X	SH3KBP1
novel_circ_0040390	X	SH3KBP1
novel_circ_0040394	X	BCLAF3
novel_circ_0040396	X	BCLAF3
novel_circ_0040398	X	RPS6KA3
novel_circ_0040399	X	RPS6KA3
novel_circ_0040400	X	RPS6KA3
novel_circ_0040404	X	RPS6KA3
novel_circ_0040410	X	CNKSR2
novel_circ_0040411	X	CNKSR2
novel_circ_0040414	X	CNKSR2
novel_circ_0040416	X	CNKSR2
novel_circ_0040417	X	CNKSR2
novel_circ_0040419	X	CNKSR2
novel_circ_0040422	X	CNKSR2
novel_circ_0040427	X	MBTPS2
novel_circ_0040428	X	MBTPS2
novel_circ_0040443	X	ACOT9
novel_circ_0040445	X	ACOT9
novel_circ_0040449	X	APOO
novel_circ_0040450	X	APOO
novel_circ_0040451	X	APOO
novel_circ_0040462	X	ZFX
novel_circ_0040463	X	PDK3
novel_circ_0040464	X	PDK3
novel_circ_0040465	X	PDK3
novel_circ_0040466	X	PDK3
novel_circ_0040467	X	PDK3
novel_circ_0040468	X	PDK3
novel_circ_0040472	X	POLA1
novel_circ_0040476	X	POLA1
novel_circ_0040477	X	POLA1
novel_circ_0040480	X	POLA1
novel_circ_0040505	X	TAB3
novel_circ_0040573	X	XK
novel_circ_0040574	X	XK
novel_circ_0040576	X	CYBB
novel_circ_0040577	X	SYTL5
novel_circ_0040579	X	SRPX
novel_circ_0040580	X	SRPX
novel_circ_0040581	X	SRPX
novel_circ_0040582	X	SRPX
novel_circ_0040584	X	SRPX
novel_circ_0040588	X	RPGR
novel_circ_0040589	X	RPGR
novel_circ_0040591	X	ATP6AP2
novel_circ_0040592	X	ATP6AP2
novel_circ_0040593	X	CXorf38
novel_circ_0040594	X	CXorf38
novel_circ_0040595	X	CXorf38
novel_circ_0040598	X	MED14
novel_circ_0040599	X	MED14
novel_circ_0040600	X	USP9X
novel_circ_0040602	X	USP9X
novel_circ_0040606	X	USP9X
novel_circ_0040607	X	USP9X
novel_circ_0040608	X	USP9X
novel_circ_0040609	X	USP9X
novel_circ_0040610	X	USP9X
novel_circ_0040611	X	USP9X
novel_circ_0040614	X	CASK
novel_circ_0040615	X	CASK
novel_circ_0040616	X	CASK
novel_circ_0040619	X	CASK
novel_circ_0040621	X	CASK
novel_circ_0040622	X	CASK
novel_circ_0040623	X	CASK
novel_circ_0040626	X	CASK
novel_circ_0040628	X	CASK
novel_circ_0040630	X	MAOA
novel_circ_0040631	X	MAOA
novel_circ_0040635	X	MAOB
novel_circ_0040638	X	MAOB
novel_circ_0040640	X	MAOB
novel_circ_0040641	X	MAOB
novel_circ_0040642	X	MAOB
novel_circ_0040644	X	EFHC2
novel_circ_0040645	X	EFHC2
novel_circ_0040650	X	KDM6A
novel_circ_0040651	X	KDM6A
novel_circ_0040652	X	KDM6A
novel_circ_0040655	X	KDM6A
novel_circ_0040656	X	KDM6A
novel_circ_0040657	X	KDM6A
novel_circ_0040658	X	KDM6A
novel_circ_0040660	X	KDM6A
novel_circ_0040661	X	KDM6A
novel_circ_0040662	X	KDM6A
novel_circ_0040663	X	CXorf36
novel_circ_0040669	X	ARHGEF9
novel_circ_0040672	X	ARHGEF9
novel_circ_0040673	X	ARHGEF9
novel_circ_0040674	X	ARHGEF9
novel_circ_0040675	X	ARHGEF9
novel_circ_0040676	X	ARHGEF9
novel_circ_0040696	X	ZC4H2
novel_circ_0040697	X	PUDP
novel_circ_0040699	X	LAS1L
novel_circ_0040700	X	MSN
novel_circ_0040707	X	VSIG4
novel_circ_0040710	X	HEPH
novel_circ_0040711	X	HEPH
novel_circ_0040712	X	KLF8
novel_circ_0040713	X	KLF8
novel_circ_0040714	X	RRAGB
novel_circ_0040715	X	RRAGB
novel_circ_0040716	X	RRAGB
novel_circ_0040717	X	RRAGB
novel_circ_0040719	X	RRAGB
novel_circ_0040721	X	FGD1
novel_circ_0040722	X	FGD1
novel_circ_0040723	X	FGD1
novel_circ_0040726	X	WNK3
novel_circ_0040727	X	WNK3
novel_circ_0040728	X	WNK3
novel_circ_0040729	X	WNK3
novel_circ_0040731	X	WNK3
novel_circ_0040732	X	WNK3
novel_circ_0040733	X	WNK3
novel_circ_0040734	X	WNK3
novel_circ_0040735	X	WNK3
novel_circ_0040736	X	WNK3
novel_circ_0040737	X	WNK3
novel_circ_0040738	X	WNK3
novel_circ_0040739	X	PHF8
novel_circ_0040740	X	PHF8
novel_circ_0040741	X	PHF8
novel_circ_0040742	X	PHF8
novel_circ_0040743	X	PHF8
novel_circ_0040744	X	PHF8
novel_circ_0040745	X	PHF8
novel_circ_0040746	X	PHF8
novel_circ_0040747	X	PHF8
novel_circ_0040749	X	PHF8
novel_circ_0040750	X	PHF8
novel_circ_0040752	X	PHF8
novel_circ_0040754	X	HUWE1
novel_circ_0040755	X	HUWE1
novel_circ_0040758	X	HUWE1
novel_circ_0040759	X	HUWE1
novel_circ_0040762	X	HUWE1
novel_circ_0040763	X	HUWE1
novel_circ_0040764	X	HUWE1
novel_circ_0040765	X	HUWE1
novel_circ_0040766	X	HUWE1
novel_circ_0040767	X	HUWE1
novel_circ_0040768	X	HUWE1
novel_circ_0040769	X	HUWE1
novel_circ_0040771	X	HUWE1
novel_circ_0040772	X	HUWE1
novel_circ_0040773	X	HUWE1
novel_circ_0040775	X	HUWE1
novel_circ_0040776	X	HUWE1
novel_circ_0040778	X	HUWE1
novel_circ_0040780	X	SMC1A
novel_circ_0040781	X	SMC1A
novel_circ_0040783	X	KDM5C
novel_circ_0040785	X	KDM5C
novel_circ_0040789	X	SHROOM4
novel_circ_0040791	X	CCNB3
novel_circ_0040792	X	CCNB3
novel_circ_0040793	X	CCNB3
novel_circ_0040794	X	CLCN5
novel_circ_0040795	X	PNPLA4
novel_circ_0040796	X	PNPLA4
novel_circ_0040797	X	PNPLA4
novel_circ_0040802	X	OTUD5
novel_circ_0040820	X	CSF2RA
novel_circ_0040832	X	JADE3
novel_circ_0040834	X	JADE3
novel_circ_0040836	X	RP2
novel_circ_0040838	X	SLC9A7
novel_circ_0040839	X	SLC9A7
novel_circ_0040840	X	SLC9A7
novel_circ_0040856	X	AR
novel_circ_0040857	X	AR
novel_circ_0040862	X	OPHN1
novel_circ_0040865	X	OPHN1
novel_circ_0040870	X	OPHN1
novel_circ_0040871	X	OPHN1
novel_circ_0040873	X	OPHN1
novel_circ_0040880	X	OPHN1
novel_circ_0040881	X	OPHN1
novel_circ_0040882	X	YIPF6
novel_circ_0040885	X	EDA
novel_circ_0040900	X	OGT
novel_circ_0040907	X	HDAC8
novel_circ_0040909	X	HDAC8
novel_circ_0040910	X	HDAC8
novel_circ_0040912	X	PHKA1
novel_circ_0040913	X	PHKA1
novel_circ_0040914	X	PHKA1
novel_circ_0040915	X	PHKA1
novel_circ_0040916	X	PHKA1
novel_circ_0040919	X	PHKA1
novel_circ_0040920	X	PHKA1
novel_circ_0040921	X	PHKA1
novel_circ_0040923	X	PHKA1
novel_circ_0040925	X	PHKA1
novel_circ_0040927	X	CHIC1
novel_circ_0040928	X	ASMTL
novel_circ_0040930	X	ASMTL
novel_circ_0040965	X	RLIM
novel_circ_0040966	X	RLIM
novel_circ_0040967	X	RLIM
novel_circ_0040968	X	ASMTL
novel_circ_0040970	X	ABCB7
novel_circ_0040971	X	ABCB7
novel_circ_0040973	X	ABCB7
novel_circ_0040978	X	ZDHHC15
novel_circ_0040981	X	ZDHHC15
novel_circ_0040983	X	ZDHHC15
novel_circ_0040985	X	ZDHHC15
novel_circ_0040988	X	ZDHHC15
novel_circ_0040989	X	ZDHHC15
novel_circ_0040990	X	ZDHHC15
novel_circ_0040991	X	ATP7A
novel_circ_0040992	X	ATP7A
novel_circ_0040993	X	ATP7A
novel_circ_0040995	X	ATP7A
novel_circ_0040996	X	ATP7A
novel_circ_0040998	X	ATP7A
novel_circ_0040999	X	ATP7A
novel_circ_0041000	X	ATP7A
novel_circ_0041001	X	ATP7A
novel_circ_0041002	X	ATP7A
novel_circ_0041004	X	MAGT1
novel_circ_0041008	X	ATRX
novel_circ_0041009	X	ATRX
novel_circ_0041012	X	ATRX
novel_circ_0041014	X	ATRX
novel_circ_0041016	X	ATRX
novel_circ_0041017	X	ATRX
novel_circ_0041018	X	ATRX
novel_circ_0041019	X	ATRX
novel_circ_0041021	X	ATRX
novel_circ_0041022	X	ATRX
novel_circ_0041024	X	ATRX
novel_circ_0041025	X	ATRX
novel_circ_0041026	X	ATRX
novel_circ_0041028	X	ATRX
novel_circ_0041030	X	ATRX
novel_circ_0041031	X	ATRX
novel_circ_0041033	X	ATRX
novel_circ_0041034	X	ATRX
novel_circ_0041035	X	ATRX
novel_circ_0041036	X	ATRX
novel_circ_0041038	X	ATRX
novel_circ_0041041	X	ATRX
novel_circ_0041042	X	ATRX
novel_circ_0041044	X	TAF9B
novel_circ_0041061	X	BRWD3
novel_circ_0041063	X	BRWD3
novel_circ_0041064	X	BRWD3
novel_circ_0041065	X	BRWD3
novel_circ_0041066	X	BRWD3
novel_circ_0041067	X	BRWD3
novel_circ_0041068	X	BRWD3
novel_circ_0041069	X	BRWD3
novel_circ_0041070	X	BRWD3
novel_circ_0041071	X	BRWD3
novel_circ_0041072	X	BRWD3
novel_circ_0041073	X	BRWD3
novel_circ_0041074	X	BRWD3
novel_circ_0041075	X	BRWD3
novel_circ_0041076	X	BRWD3
novel_circ_0041077	X	BRWD3
novel_circ_0041078	X	BRWD3
novel_circ_0041079	X	BRWD3
novel_circ_0041080	X	BRWD3
novel_circ_0041081	X	BRWD3
novel_circ_0041082	X	BRWD3
novel_circ_0041083	X	BRWD3
novel_circ_0041084	X	BRWD3
novel_circ_0041085	X	BRWD3
novel_circ_0041087	X	BRWD3
novel_circ_0041093	X	SH3BGRL
novel_circ_0041094	X	SHROOM2
novel_circ_0041095	X	SHROOM2
novel_circ_0041098	X	RPS6KA6
novel_circ_0041099	X	RPS6KA6
novel_circ_0041104	X	RPS6KA6
novel_circ_0041105	X	RPS6KA6
novel_circ_0041106	X	RPS6KA6
novel_circ_0041107	X	RPS6KA6
novel_circ_0041108	X	RPS6KA6
novel_circ_0041111	X	RPS6KA6
novel_circ_0041112	X	RPS6KA6
novel_circ_0041118	X	RPS6KA6
novel_circ_0041120	X	RPS6KA6
novel_circ_0041123	X	RPS6KA6
novel_circ_0041131	X	WWC3
novel_circ_0041132	X	WWC3
novel_circ_0041133	X	WWC3
novel_circ_0041134	X	WWC3
novel_circ_0041135	X	WWC3
novel_circ_0041136	X	WWC3
novel_circ_0041137	X	WWC3
novel_circ_0041139	X	WWC3
novel_circ_0041141	X	WWC3
novel_circ_0041142	X	WWC3
novel_circ_0041143	X	APOOL
novel_circ_0041145	X	APOOL
novel_circ_0041149	X	APOOL
novel_circ_0041150	X	APOOL
novel_circ_0041153	X	WWC3
novel_circ_0041154	X	WWC3
novel_circ_0041158	X	CHM
novel_circ_0041162	X	CHM
novel_circ_0041163	X	CHM
novel_circ_0041164	X	CHM
novel_circ_0041166	X	CHM
novel_circ_0041167	X	CHM
novel_circ_0041168	X	CHM
novel_circ_0041170	X	CHM
novel_circ_0041172	X	CHM
novel_circ_0041177	X	DKC1
novel_circ_0041178	X	DKC1
novel_circ_0041179	X	DKC1
novel_circ_0041181	X	--;MPP1
novel_circ_0041183	X	MPP1
novel_circ_0041184	X	F8
novel_circ_0041185	X	F8
novel_circ_0041186	X	F8
novel_circ_0041187	X	F8
novel_circ_0041188	X	F8
novel_circ_0041192	X	BRCC3
novel_circ_0041193	X	BRCC3
novel_circ_0041194	X	BRCC3
novel_circ_0041198	X	BRCC3
novel_circ_0041201	X	VBP1
novel_circ_0041202	X	TMLHE
novel_circ_0041203	X	TMLHE
novel_circ_0041204	X	TMLHE
novel_circ_0041205	X	VAMP7
novel_circ_0041209	X	FAM3A
novel_circ_0041210	X	FAM50A
novel_circ_0041211	X	GDI1
novel_circ_0041212	X	TAZ
novel_circ_0041214	X	FLNA
novel_circ_0041215	X	FLNA
novel_circ_0041222	X	MID1
novel_circ_0041223	X	MID1
novel_circ_0041226	X	MTMR1
novel_circ_0041227	X	MTMR1
novel_circ_0041228	X	MTMR1
novel_circ_0041229	X	MTMR1
novel_circ_0041230	X	MTMR1
novel_circ_0041231	X	MTMR1
novel_circ_0041232	X	MTMR1
novel_circ_0041234	X	MTM1
novel_circ_0041236	X	MTM1
novel_circ_0041237	X	MTM1
novel_circ_0041238	X	MTM1
novel_circ_0041239	X	MTM1
novel_circ_0041246	X	AFF2
novel_circ_0041247	X	AFF2
novel_circ_0041249	X	FMR1
novel_circ_0041250	X	FMR1
novel_circ_0041251	X	FMR1
novel_circ_0041253	X	FMR1
novel_circ_0041255	X	FMR1
novel_circ_0041257	X	FMR1
novel_circ_0041258	X	FMR1
novel_circ_0041267	X	ARHGAP6
novel_circ_0041269	X	ARHGAP6
novel_circ_0041270	X	ARHGAP6
novel_circ_0041271	X	ARHGAP6
novel_circ_0041289	X	ATP11C
novel_circ_0041290	X	ATP11C
novel_circ_0041291	X	ATP11C
novel_circ_0041292	X	ATP11C
novel_circ_0041294	X	ATP11C
novel_circ_0041303	X	ARHGEF6
novel_circ_0041304	X	ARHGEF6
novel_circ_0041305	X	ARHGEF6
novel_circ_0041306	X	ARHGEF6
novel_circ_0041308	X	MAP7D3
novel_circ_0041309	X	MAP7D3
novel_circ_0041310	X	MAP7D3
novel_circ_0041311	X	MAP7D3
novel_circ_0041312	X	SLC9A6
novel_circ_0041313	X	SLC9A6
novel_circ_0041315	X	SLC9A6
novel_circ_0041316	X	SLC9A6
novel_circ_0041317	X	SLC9A6
novel_circ_0041319	X	SLC9A6
novel_circ_0041320	X	SLC9A6
novel_circ_0041321	X	SLC9A6
novel_circ_0041324	X	INTS6L
novel_circ_0041325	X	INTS6L
novel_circ_0041326	X	INTS6L
novel_circ_0041327	X	INTS6L
novel_circ_0041328	X	INTS6L
novel_circ_0041329	X	INTS6L
novel_circ_0041330	X	INTS6L
novel_circ_0041331	X	INTS6L
novel_circ_0041332	X	INTS6L
novel_circ_0041333	X	INTS6L
novel_circ_0041338	X	ZNF449
novel_circ_0041340	X	ZNF75D
novel_circ_0041341	X	ZNF75D
novel_circ_0041342	X	ZNF75D
novel_circ_0041350	X	PHF6
novel_circ_0041351	X	PHF6
novel_circ_0041356	X	GPC3
novel_circ_0041359	X	GPC4
novel_circ_0041367	X	LAMP2
novel_circ_0041368	X	LAMP2
novel_circ_0041369	X	LAMP2
novel_circ_0041370	X	CUL4B
novel_circ_0041372	X	CUL4B
novel_circ_0039850	JH921663.1	PRKAR1B
novel_circ_0039852	JH921663.1	PRKAR1B
novel_circ_0019444	24	LITAF
novel_circ_0019445	24	LITAF
novel_circ_0019448	24	TXNDC11
novel_circ_0019449	24	TXNDC11
novel_circ_0019450	24	TXNDC11
novel_circ_0019452	24	TXNDC11
novel_circ_0019453	24	TXNDC11
novel_circ_0019454	24	TXNDC11
novel_circ_0019455	24	TXNDC11
novel_circ_0019456	24	TXNDC11
novel_circ_0019457	24	ZC3H7A
novel_circ_0019460	24	ZC3H7A
novel_circ_0019462	24	ZC3H7A
novel_circ_0019463	24	ZC3H7A
novel_circ_0019467	24	GSPT1
novel_circ_0019468	24	GSPT1
novel_circ_0019488	24	IFT140
novel_circ_0019492	24	ERCC4
novel_circ_0019493	24	ERCC4
novel_circ_0019494	24	ERCC4
novel_circ_0019495	24	ERCC4
novel_circ_0019496	24	ERCC4
novel_circ_0019497	24	ERCC4
novel_circ_0019501	24	MKL2
novel_circ_0019511	24	PARN
novel_circ_0019513	24	PARN
novel_circ_0019515	24	PARN
novel_circ_0019517	24	PARN
novel_circ_0019523	24	PARN
novel_circ_0019524	24	PARN
novel_circ_0019525	24	RRN3
novel_circ_0019526	24	RRN3
novel_circ_0019527	24	RRN3
novel_circ_0019528	24	RRN3
novel_circ_0019529	24	PDXDC1
novel_circ_0019532	24	PDXDC1
novel_circ_0019533	24	PDXDC1
novel_circ_0019534	24	PDXDC1
novel_circ_0019535	24	PDXDC1
novel_circ_0019536	24	PDXDC1
novel_circ_0019537	24	PDXDC1
novel_circ_0019538	24	PDXDC1
novel_circ_0019539	24	PDXDC1
novel_circ_0019540	24	PDXDC1
novel_circ_0019542	24	MARF1
novel_circ_0019543	24	NDE1
novel_circ_0019544	24	NDE1
novel_circ_0019545	24	NDE1
novel_circ_0019546	24	NDE1
novel_circ_0019547	24	MYH11
novel_circ_0019548	24	MYH11
novel_circ_0019549	24	MYH11
novel_circ_0019550	24	MYH11
novel_circ_0019552	24	MYH11
novel_circ_0019554	24	MYH11
novel_circ_0019555	24	MYH11
novel_circ_0019559	24	MYH11
novel_circ_0019560	24	MYH11
novel_circ_0019562	24	MYH11
novel_circ_0019563	24	MYH11
novel_circ_0019567	24	FOPNL
novel_circ_0019568	24	ABCC1
novel_circ_0019569	24	ABCC1
novel_circ_0019572	24	ABCC1
novel_circ_0019573	24	ABCC1
novel_circ_0019574	24	ABCC1
novel_circ_0019575	24	ABCC1
novel_circ_0019584	24	XYLT1
novel_circ_0019585	24	XYLT1
novel_circ_0019586	24	ARL6IP1
novel_circ_0019587	24	SMG1
novel_circ_0019588	24	SMG1
novel_circ_0019589	24	SMG1
novel_circ_0019590	24	SMG1
novel_circ_0019591	24	SMG1
novel_circ_0019593	24	SMG1
novel_circ_0019594	24	SMG1
novel_circ_0019595	24	SMG1
novel_circ_0019596	24	SMG1
novel_circ_0019597	24	SMG1
novel_circ_0019598	24	SMG1
novel_circ_0019601	24	TMC7
novel_circ_0019602	24	TMC7
novel_circ_0019604	24	GDE1
novel_circ_0019605	24	GDE1
novel_circ_0019606	24	GDE1
novel_circ_0019607	24	GDE1
novel_circ_0019609	24	CCP110
novel_circ_0019611	24	C16orf62
novel_circ_0019613	24	C16orf62
novel_circ_0019614	24	C16orf62
novel_circ_0019615	24	C16orf62
novel_circ_0019616	24	C16orf62
novel_circ_0019624	24	C16orf62
novel_circ_0019625	24	C16orf62
novel_circ_0019626	24	C16orf62
novel_circ_0019628	24	C16orf62
novel_circ_0019638	24	C16orf62
novel_circ_0019639	24	IQCK
novel_circ_0019641	24	ERI2
novel_circ_0019642	24	REXO5
novel_circ_0019644	24	REXO5
novel_circ_0019650	24	LYRM1
novel_circ_0019651	24	LYRM1
novel_circ_0019656	24	ZP2
novel_circ_0019660	24	UQCRC2
novel_circ_0019662	24	UQCRC2
novel_circ_0019666	24	POLR3E
novel_circ_0019668	24	POLR3E
novel_circ_0019669	24	POLR3E;EEF2K
novel_circ_0019670	24	EEF2K
novel_circ_0019672	24	EEF2K
novel_circ_0019673	24	EEF2K
novel_circ_0019674	24	EEF2K
novel_circ_0019675	24	EEF2K
novel_circ_0019676	24	POLR3E
novel_circ_0019678	24	METTL9
novel_circ_0019679	24	METTL9
novel_circ_0019680	24	METTL9
novel_circ_0019681	24	PDPK1
novel_circ_0019682	24	PDPK1
novel_circ_0019683	24	PDPK1
novel_circ_0019684	24	PDPK1
novel_circ_0019685	24	PDPK1
novel_circ_0019687	24	PDPK1
novel_circ_0019688	24	PDPK1
novel_circ_0019690	24	USP31
novel_circ_0019691	24	USP31
novel_circ_0019692	24	USP31
novel_circ_0019693	24	USP31
novel_circ_0019697	24	COG7
novel_circ_0019699	24	COG7
novel_circ_0019701	24	COG7
novel_circ_0019702	24	COG7
novel_circ_0019703	24	COG7
novel_circ_0019704	24	COG7
novel_circ_0019705	24	COG7
novel_circ_0019706	24	COG7
novel_circ_0019707	24	COG7
novel_circ_0019708	24	COG7
novel_circ_0019709	24	COG7
novel_circ_0019710	24	COG7
novel_circ_0019711	24	COG7
novel_circ_0019712	24	COG7
novel_circ_0019717	24	GGA2
novel_circ_0019718	24	GGA2
novel_circ_0019719	24	EARS2
novel_circ_0019721	24	PALB2
novel_circ_0019723	24	PRKCB
novel_circ_0019724	24	PRKCB
novel_circ_0019725	24	PRKCB
novel_circ_0019726	24	PRKCB
novel_circ_0019733	24	TNRC6A
novel_circ_0019735	24	TNRC6A
novel_circ_0019737	24	TNRC6A
novel_circ_0019738	24	TNRC6A
novel_circ_0019739	24	ARHGAP17
novel_circ_0019741	24	ARHGAP17
novel_circ_0019743	24	ARHGAP17
novel_circ_0019750	24	LCMT1
novel_circ_0019751	24	LCMT1
novel_circ_0019752	24	AXIN1
novel_circ_0019754	24	NSMCE1
novel_circ_0019755	24	IL4R
novel_circ_0019756	24	GTF3C1
novel_circ_0019757	24	GTF3C1
novel_circ_0019758	24	KIAA0556
novel_circ_0019759	24	KIAA0556
novel_circ_0019760	24	KIAA0556
novel_circ_0019761	24	KIAA0556
novel_circ_0019762	24	KIAA0556
novel_circ_0019764	24	KIAA0556
novel_circ_0019765	24	KIAA0556
novel_circ_0019766	24	KIAA0556
novel_circ_0019767	24	KIAA0556
novel_circ_0019768	24	XPO6
novel_circ_0019769	24	XPO6
novel_circ_0019770	24	XPO6
novel_circ_0019774	24	XPO6
novel_circ_0019775	24	XPO6
novel_circ_0019776	24	XPO6
novel_circ_0019778	24	XPO6
novel_circ_0019780	24	ATP2A1
novel_circ_0019788	24	KIF22
novel_circ_0019790	24	ITGAL
novel_circ_0019792	24	ITGAL
novel_circ_0019794	24	ITGAL
novel_circ_0019797	24	RNF40
novel_circ_0019798	24	FBXL19
novel_circ_0019799	24	SETD1A
novel_circ_0019803	24	ITGAM
novel_circ_0019805	24	TGFB1I1
novel_circ_0019815	24	NIPSNAP2
novel_circ_0019817	24	NIPSNAP2
novel_circ_0019818	24	PSPH
novel_circ_0019825	24	TPST1
novel_circ_0019844	24	CLUAP1
novel_circ_0019845	24	CLUAP1
novel_circ_0019846	24	CLUAP1
novel_circ_0019849	24	CLUAP1
novel_circ_0019852	24	TRAP1
novel_circ_0019861	24	CREBBP
novel_circ_0019862	24	CREBBP
novel_circ_0019864	24	CREBBP
novel_circ_0019866	24	CREBBP
novel_circ_0019867	24	CREBBP
novel_circ_0019901	24	ADCY9
novel_circ_0019903	24	ADCY9
novel_circ_0019904	24	ADCY9
novel_circ_0019905	24	CLIP2
novel_circ_0019906	24	CLIP2
novel_circ_0019907	24	CLIP2
novel_circ_0019908	24	CLIP2
novel_circ_0019909	24	RFC2
novel_circ_0019910	24	EIF4H
novel_circ_0019911	24	EIF4H
novel_circ_0019912	24	EIF4H
novel_circ_0019913	24	STX1A
novel_circ_0019914	24	TBL2
novel_circ_0019915	24	BAZ1B
novel_circ_0019916	24	BAZ1B
novel_circ_0019917	24	BAZ1B
novel_circ_0019918	24	BAZ1B
novel_circ_0019919	24	BAZ1B
novel_circ_0019920	24	BAZ1B
novel_circ_0019921	24	NSUN5
novel_circ_0019923	24	HIP1
novel_circ_0019924	24	HIP1
novel_circ_0019926	24	HIP1
novel_circ_0019927	24	HIP1
novel_circ_0019928	24	HIP1
novel_circ_0019930	24	HIP1
novel_circ_0019931	24	HIP1
novel_circ_0019933	24	HIP1
novel_circ_0019937	24	HIP1
novel_circ_0019938	24	HIP1
novel_circ_0019940	24	POR
novel_circ_0019943	24	PRKRIP1
novel_circ_0019944	24	TFAP4
novel_circ_0019945	24	CUX1
novel_circ_0019954	24	RAB11FIP3
novel_circ_0019955	24	SRRT
novel_circ_0019956	24	EPHB4
novel_circ_0019957	24	NYAP1
novel_circ_0019958	24	DNAJA3
novel_circ_0019959	24	TRIM4
novel_circ_0019960	24	ZSCAN25
novel_circ_0019964	24	ARPC1B
novel_circ_0019968	24	LMTK2
novel_circ_0019969	24	LMTK2
novel_circ_0019970	24	LMTK2
novel_circ_0019974	24	PMS2
novel_circ_0019975	24	PMS2
novel_circ_0019976	24	PMS2
novel_circ_0019978	24	PMS2
novel_circ_0019979	24	PMS2
novel_circ_0019980	24	PMS2
novel_circ_0019981	24	PMS2
novel_circ_0019982	24	PMS2
novel_circ_0019983	24	PMS2
novel_circ_0019984	24	PMS2
novel_circ_0019985	24	PMS2
novel_circ_0019986	24	MGRN1
novel_circ_0019988	24	EIF2AK1
novel_circ_0019989	24	EIF2AK1
novel_circ_0019990	24	MGRN1
novel_circ_0019995	24	ANKS3
novel_circ_0019999	24	ANKS3
novel_circ_0020001	24	ZNF12
novel_circ_0020002	24	RNF216
novel_circ_0020003	24	RNF216
novel_circ_0020004	24	RNF216
novel_circ_0020007	24	RNF216
novel_circ_0020010	24	RNF216
novel_circ_0020011	24	RNF216
novel_circ_0020012	24	RNF216
novel_circ_0020013	24	RNF216
novel_circ_0020014	24	RNF216
novel_circ_0020015	24	RNF216
novel_circ_0020019	24	RNF216
novel_circ_0020023	24	RNF216
novel_circ_0020025	24	TNRC18
novel_circ_0020027	24	RADIL
novel_circ_0020028	24	GLYR1
novel_circ_0020050	24	GNA12;--
novel_circ_0020052	24	IQCE
novel_circ_0020054	24	SNX8
novel_circ_0020055	24	SNX8
novel_circ_0020059	24	ADAP1
novel_circ_0020060	24	SUN1
novel_circ_0020066	24	PIGQ
novel_circ_0020067	24	LMF1
novel_circ_0020072	24	PMM2
novel_circ_0020073	24	PMM2
novel_circ_0020074	24	PMM2
novel_circ_0020075	24	CARHSP1
novel_circ_0020077	24	USP7
novel_circ_0020078	24	C16orf72
novel_circ_0020079	24	ATF7IP2
novel_circ_0020080	24	EMP2
novel_circ_0020082	24	NPRL3
novel_circ_0020084	24	NPRL3
novel_circ_0020085	24	CIITA
novel_circ_0020087	24	CIITA
novel_circ_0020088	24	CIITA
novel_circ_0020089	24	CLEC16A
novel_circ_0020090	24	CLEC16A
novel_circ_0020091	24	CLEC16A
novel_circ_0020092	24	CLEC16A
novel_circ_0020093	24	CLEC16A
novel_circ_0020096	24	CLEC16A
novel_circ_0020097	24	CLEC16A
novel_circ_0020100	24	CLEC16A
novel_circ_0020101	24	CLEC16A
novel_circ_0020102	24	CLEC16A
novel_circ_0020103	24	CLEC16A
novel_circ_0020106	24	CLEC16A
novel_circ_0020110	24	CLEC16A
novel_circ_0020112	24	CLEC16A
novel_circ_0020114	24	CLEC16A
novel_circ_0020121	25	RYR2
novel_circ_0020122	25	RYR2
novel_circ_0020124	25	RYR2
novel_circ_0020125	25	RYR2
novel_circ_0020128	25	RYR2
novel_circ_0020129	25	RYR2
novel_circ_0020130	25	RYR2
novel_circ_0020131	25	RYR2
novel_circ_0020132	25	RYR2
novel_circ_0020134	25	RYR2
novel_circ_0020135	25	RYR2
novel_circ_0020136	25	RYR2
novel_circ_0020138	25	RYR2
novel_circ_0020139	25	RYR2
novel_circ_0020143	25	RYR2
novel_circ_0020144	25	RYR2
novel_circ_0020145	25	RYR2
novel_circ_0020146	25	RYR2
novel_circ_0020147	25	RYR2
novel_circ_0020151	25	ZNF84
novel_circ_0020152	25	ZNF84
novel_circ_0020154	25	ZNF84
novel_circ_0020155	25	ZNF84
novel_circ_0020162	25	ZNF248
novel_circ_0020163	25	BMS1
novel_circ_0020164	25	BMS1
novel_circ_0020165	25	BMS1
novel_circ_0020166	25	CSGALNACT2
novel_circ_0020167	25	CSGALNACT2
novel_circ_0020169	25	CSGALNACT2
novel_circ_0020170	25	CSGALNACT2
novel_circ_0020171	25	CSGALNACT2
novel_circ_0020179	25	BICC1
novel_circ_0020181	25	BICC1
novel_circ_0020184	25	BICC1
novel_circ_0020185	25	BICC1
novel_circ_0020186	25	BICC1
novel_circ_0020187	25	BICC1
novel_circ_0020188	25	BICC1
novel_circ_0020189	25	BICC1
novel_circ_0020190	25	BICC1
novel_circ_0020191	25	BICC1
novel_circ_0020192	25	BICC1
novel_circ_0020193	25	BICC1
novel_circ_0020194	25	FAM13C
novel_circ_0020195	25	FAM13C
novel_circ_0020196	25	FAM13C
novel_circ_0020197	25	FAM13C
novel_circ_0020199	25	FAM13C
novel_circ_0020200	25	FAM13C
novel_circ_0020202	25	FAM13C
novel_circ_0020203	25	FAM13C
novel_circ_0020204	25	FAM13C
novel_circ_0020205	25	FAM13C
novel_circ_0020206	25	FAM13C
novel_circ_0020208	25	FAM13C
novel_circ_0020211	25	FAM13C
novel_circ_0020216	25	FAM13C
novel_circ_0020220	25	FAM13C
novel_circ_0020224	25	SLC16A9
novel_circ_0020225	25	CCDC6
novel_circ_0020226	25	CCDC6
novel_circ_0020227	25	CCDC6
novel_circ_0020229	25	CCDC6
novel_circ_0020230	25	CCDC6
novel_circ_0020232	25	CCDC6
novel_circ_0020233	25	CCDC6
novel_circ_0020234	25	CCDC6
novel_circ_0020237	25	ANK3
novel_circ_0020238	25	ANK3
novel_circ_0020239	25	ANK3
novel_circ_0020246	25	ANK3
novel_circ_0020247	25	ANK3
novel_circ_0020248	25	ANK3
novel_circ_0020253	25	GALNT2
novel_circ_0020254	25	GALNT2
novel_circ_0020255	25	GALNT2
novel_circ_0020259	25	RHOBTB1
novel_circ_0020261	25	TMEM26
novel_circ_0020263	25	PGBD5
novel_circ_0020265	25	ARID5B
novel_circ_0020266	25	ARID5B
novel_circ_0020267	25	ARID5B
novel_circ_0020268	25	ARID5B
novel_circ_0020272	25	ARID5B
novel_circ_0020273	25	ARID5B
novel_circ_0020274	25	RTKN2
novel_circ_0020275	25	RTKN2
novel_circ_0020276	25	RTKN2
novel_circ_0020280	25	RTKN2
novel_circ_0020283	25	JMJD1C
novel_circ_0020284	25	JMJD1C
novel_circ_0020286	25	JMJD1C
novel_circ_0020287	25	JMJD1C
novel_circ_0020288	25	JMJD1C
novel_circ_0020292	25	JMJD1C
novel_circ_0020294	25	JMJD1C
novel_circ_0020308	25	REEP3
novel_circ_0020311	25	SIRT1
novel_circ_0020312	25	SIRT1
novel_circ_0020313	25	HERC4
novel_circ_0020314	25	HERC4
novel_circ_0020315	25	HERC4
novel_circ_0020316	25	HERC4
novel_circ_0020320	25	HERC4
novel_circ_0020321	25	HERC4
novel_circ_0020325	25	HERC4
novel_circ_0020329	25	HERC4
novel_circ_0020330	25	HERC4
novel_circ_0020331	25	HERC4
novel_circ_0020332	25	HERC4
novel_circ_0020333	25	HERC4
novel_circ_0020335	25	HERC4
novel_circ_0020336	25	HERC4
novel_circ_0020337	25	HERC4
novel_circ_0020340	25	HERC4
novel_circ_0020341	25	HERC4
novel_circ_0020345	25	PBLD
novel_circ_0020347	25	HNRNPH3
novel_circ_0020348	25	HNRNPH3
novel_circ_0020350	25	RUFY2
novel_circ_0020351	25	RUFY2
novel_circ_0020353	25	RUFY2
novel_circ_0020354	25	RUFY2
novel_circ_0020355	25	RUFY2
novel_circ_0020356	25	RUFY2
novel_circ_0020357	25	RUFY2
novel_circ_0020359	25	RUFY2
novel_circ_0020360	25	DNA2
novel_circ_0020361	25	DNA2
novel_circ_0020362	25	DNA2
novel_circ_0020363	25	DNA2
novel_circ_0020364	25	DNA2
novel_circ_0020365	25	SLC25A16
novel_circ_0020366	25	SLC25A16
novel_circ_0020367	25	SLC25A16
novel_circ_0020368	25	SLC25A16
novel_circ_0020369	25	SLC25A16
novel_circ_0020371	25	TET1
novel_circ_0020372	25	TET1
novel_circ_0020373	25	TET1
novel_circ_0020374	25	TET1
novel_circ_0020375	25	TET1
novel_circ_0020376	25	TET1
novel_circ_0020377	25	TET1
novel_circ_0020378	25	CCAR1
novel_circ_0020379	25	CCAR1
novel_circ_0020380	25	CCAR1
novel_circ_0020381	25	CCAR1
novel_circ_0020383	25	DDX50
novel_circ_0020384	25	DDX50
novel_circ_0020386	25	DDX50
novel_circ_0020387	25	DDX50
novel_circ_0020389	25	DDX50
novel_circ_0020390	25	DDX50
novel_circ_0020391	25	DDX21
novel_circ_0020392	25	DDX21
novel_circ_0020393	25	DDX21
novel_circ_0020395	25	KIF1BP
novel_circ_0020396	25	KIF1BP
novel_circ_0020397	25	VPS26A
novel_circ_0020398	25	VPS26A
novel_circ_0020399	25	VPS26A
novel_circ_0020401	25	VPS26A
novel_circ_0020402	25	VPS26A
novel_circ_0020404	25	SUPV3L1
novel_circ_0020405	25	SUPV3L1
novel_circ_0020406	25	SUPV3L1
novel_circ_0020407	25	HKDC1
novel_circ_0020408	25	HK1
novel_circ_0020409	25	HK1
novel_circ_0020410	25	HK1
novel_circ_0020411	25	HK1
novel_circ_0020412	25	HK1
novel_circ_0020413	25	HK1
novel_circ_0020414	25	HK1
novel_circ_0020415	25	HK1
novel_circ_0020416	25	TSPAN15
novel_circ_0020419	25	H2AFY2
novel_circ_0020420	25	H2AFY2
novel_circ_0020421	25	H2AFY2
novel_circ_0020422	25	AIFM2
novel_circ_0020427	25	PALD1
novel_circ_0020428	25	PALD1
novel_circ_0020429	25	ADAMTS14
novel_circ_0020435	25	ASCC1
novel_circ_0020440	25	ASCC1
novel_circ_0020443	25	ASCC1
novel_circ_0020445	25	ASCC1
novel_circ_0020446	25	ASCC1
novel_circ_0020447	25	ASCC1
novel_circ_0020449	25	MICU1
novel_circ_0020451	25	MICU1
novel_circ_0020452	25	MICU1
novel_circ_0020456	25	MICU1
novel_circ_0020459	25	MCU
novel_circ_0020462	25	MCU
novel_circ_0020463	25	MCU
novel_circ_0020464	25	MCU
novel_circ_0020468	25	P4HA1
novel_circ_0020470	25	P4HA1
novel_circ_0020471	25	P4HA1
novel_circ_0020472	25	P4HA1
novel_circ_0020474	25	NUDT13
novel_circ_0020475	25	ECD
novel_circ_0020476	25	ECD
novel_circ_0020477	25	ECD
novel_circ_0020478	25	ECD
novel_circ_0020479	25	ECD
novel_circ_0020480	25	FAM149B1
novel_circ_0020480	25	FAM149B1
novel_circ_0020481	25	FAM149B1
novel_circ_0020482	25	FAM149B1
novel_circ_0020483	25	FAM149B1
novel_circ_0020484	25	FAM149B1
novel_circ_0020485	25	FAM149B1
novel_circ_0020486	25	FAM149B1
novel_circ_0020487	25	FAM149B1
novel_circ_0020489	25	CFAP70
novel_circ_0020490	25	CFAP70
novel_circ_0020491	25	CFAP70
novel_circ_0020492	25	PPP3CB
novel_circ_0020493	25	PPP3CB
novel_circ_0020494	25	PPP3CB
novel_circ_0020496	25	USP54
novel_circ_0020511	25	VCL
novel_circ_0020512	25	VCL
novel_circ_0020513	25	VCL
novel_circ_0020514	25	VCL
novel_circ_0020515	25	VCL
novel_circ_0020516	25	AP3M1
novel_circ_0020518	25	AP3M1
novel_circ_0020523	25	ADK
novel_circ_0020526	25	ADK
novel_circ_0020528	25	KAT6B
novel_circ_0020530	25	KAT6B
novel_circ_0020531	25	KAT6B
novel_circ_0020534	25	VDAC2
novel_circ_0020535	25	VDAC2
novel_circ_0020536	25	VDAC2
novel_circ_0020541	25	LRMDA
novel_circ_0020542	25	LRMDA
novel_circ_0020543	25	LRMDA
novel_circ_0020545	25	KCNMA1
novel_circ_0020550	25	KCNMA1
novel_circ_0020553	25	DLG5
novel_circ_0020555	25	POLR3A
novel_circ_0020570	25	ZCCHC24
novel_circ_0020572	25	C1orf198
novel_circ_0020573	25	TTC13
novel_circ_0020574	25	TTC13
novel_circ_0020575	25	TTC13
novel_circ_0020576	25	ARV1
novel_circ_0020581	25	GHITM
novel_circ_0020582	25	GHITM
novel_circ_0020583	25	CCSER2
novel_circ_0020584	25	CCSER2
novel_circ_0020587	25	CCSER2
novel_circ_0020588	25	CCSER2
novel_circ_0020589	25	CCSER2
novel_circ_0020591	25	CCSER2
novel_circ_0020592	25	CCSER2
novel_circ_0020593	25	CCSER2
novel_circ_0020596	25	CCSER2
novel_circ_0020598	25	GRID1
novel_circ_0020601	25	GRID1
novel_circ_0020603	25	GRID1
novel_circ_0020605	25	GRID1
novel_circ_0020606	25	GRID1
novel_circ_0020607	25	GNPAT
novel_circ_0020609	25	GNPAT
novel_circ_0020610	25	GNPAT
novel_circ_0020611	25	WAPL
novel_circ_0020613	25	SPRTN
novel_circ_0020614	25	SPRTN
novel_circ_0020615	25	SPRTN
novel_circ_0020617	25	BMPR1A
novel_circ_0020620	25	BMPR1A
novel_circ_0020621	25	BMPR1A
novel_circ_0020626	25	GLUD1
novel_circ_0020628	25	FAM35A
novel_circ_0020629	25	FAM35A
novel_circ_0020631	25	PTPN20
novel_circ_0020632	25	PTPN20
novel_circ_0020633	25	PTPN20
novel_circ_0020634	25	PTPN20
novel_circ_0020638	25	MAPK8
novel_circ_0020640	25	MAPK8
novel_circ_0020641	25	MAPK8
novel_circ_0020642	25	MAPK8
novel_circ_0020644	25	WDFY4
novel_circ_0020645	25	VSTM4
novel_circ_0020651	25	ERCC6
novel_circ_0020652	25	ERCC6
novel_circ_0020653	25	ERCC6
novel_circ_0020655	25	ERCC6
novel_circ_0020657	25	ERCC6
novel_circ_0020658	25	ERCC6
novel_circ_0020661	25	ERCC6
novel_circ_0020662	25	ERCC6
novel_circ_0020663	25	ERCC6
novel_circ_0020665	25	PARG
novel_circ_0020673	25	PARG
novel_circ_0020675	25	PARG
novel_circ_0020678	25	PARG
novel_circ_0020686	25	ZFAND4
novel_circ_0020687	25	ZFAND4
novel_circ_0020688	25	ZFAND4
novel_circ_0020689	25	ZFAND4
novel_circ_0020694	25	CXCL12
novel_circ_0020698	25	COG2
novel_circ_0020699	25	COG2
novel_circ_0020700	25	COG2
novel_circ_0020703	25	DISC1
novel_circ_0020707	25	DISC1
novel_circ_0020708	25	DISC1
novel_circ_0020710	25	DISC1
novel_circ_0020712	25	DISC1
novel_circ_0020713	25	DISC1
novel_circ_0020718	25	DISC1
novel_circ_0020721	25	SIPA1L2
novel_circ_0020722	25	SIPA1L2
novel_circ_0020723	25	SIPA1L2
novel_circ_0020724	25	SIPA1L2
novel_circ_0020725	25	SIPA1L2
novel_circ_0020726	25	SIPA1L2
novel_circ_0020727	25	SIPA1L2
novel_circ_0020729	25	SIPA1L2
novel_circ_0020730	25	SIPA1L2
novel_circ_0020731	25	SIPA1L2
novel_circ_0020732	25	SIPA1L2
novel_circ_0020736	25	NTPCR
novel_circ_0020739	25	RAB4A
novel_circ_0020740	25	RAB4A
novel_circ_0020741	25	MAP3K21
novel_circ_0020742	25	MAP3K21
novel_circ_0020743	25	MAP3K21
novel_circ_0020744	25	MAP3K21
novel_circ_0020745	25	MAP3K21
novel_circ_0020746	25	MAP3K21
novel_circ_0020747	25	MAP3K21
novel_circ_0020751	25	SLC35F3
novel_circ_0020752	25	TARBP1
novel_circ_0020753	25	TARBP1
novel_circ_0020755	25	TARBP1
novel_circ_0020756	25	TARBP1
novel_circ_0020757	25	TARBP1
novel_circ_0020758	25	TARBP1
novel_circ_0020760	25	TARBP1
novel_circ_0020764	25	RBM34
novel_circ_0020765	25	RBM34
novel_circ_0020766	25	RBM34
novel_circ_0020769	25	ARID4B
novel_circ_0020770	25	ARID4B
novel_circ_0020772	25	ARID4B
novel_circ_0020773	25	ARID4B
novel_circ_0020775	25	ARID4B
novel_circ_0020776	25	ARID4B
novel_circ_0020777	25	ARID4B
novel_circ_0020782	25	TBCE
novel_circ_0020783	25	TBCE
novel_circ_0020784	25	TBCE
novel_circ_0020786	25	TBCE
novel_circ_0020788	25	B3GALNT2
novel_circ_0020790	25	B3GALNT2
novel_circ_0020791	25	B3GALNT2
novel_circ_0020792	25	B3GALNT2
novel_circ_0020793	25	B3GALNT2
novel_circ_0020794	25	B3GALNT2
novel_circ_0020795	25	B3GALNT2
novel_circ_0020796	25	B3GALNT2
novel_circ_0020799	25	LYST
novel_circ_0020800	25	LYST
novel_circ_0020802	25	LYST
novel_circ_0020803	25	LYST
novel_circ_0020804	25	LYST
novel_circ_0020807	25	ABCB10
novel_circ_0020808	25	LYST
novel_circ_0020809	25	LYST
novel_circ_0020810	25	LYST
novel_circ_0020811	25	LYST
novel_circ_0020812	25	ABCB10
novel_circ_0020814	25	ABCB10
novel_circ_0020815	25	ABCB10
novel_circ_0020816	25	NID1
novel_circ_0020817	25	NID1
novel_circ_0020818	25	NID1
novel_circ_0020819	25	NID1
novel_circ_0020821	25	GPR137B
novel_circ_0020823	25	GPR137B
novel_circ_0020824	25	GPR137B
novel_circ_0020825	25	ERO1B
novel_circ_0020826	25	ERO1B
novel_circ_0020827	25	ERO1B
novel_circ_0020832	25	ERO1B
novel_circ_0020834	25	ERO1B
novel_circ_0020837	25	ERO1B
novel_circ_0020840	25	HEATR1
novel_circ_0020842	25	HEATR1
novel_circ_0020843	25	HEATR1
novel_circ_0020844	25	HEATR1
novel_circ_0020845	25	HEATR1
novel_circ_0020846	25	HEATR1
novel_circ_0020847	25	HEATR1
novel_circ_0020851	25	ACTN2
novel_circ_0020852	25	ACTN2
novel_circ_0020853	25	ACTN2
novel_circ_0020856	25	MTR
novel_circ_0020857	25	MTR
novel_circ_0020859	25	MTR
novel_circ_0020861	25	MTR
novel_circ_0020862	25	MTR
novel_circ_0020864	25	MTR
novel_circ_0020865	25	MTR
novel_circ_0020867	25	MTR
novel_circ_0020869	25	MTR
novel_circ_0020871	25	MTR
novel_circ_0020872	25	MTR
novel_circ_0020873	25	MTR
novel_circ_0020874	25	MTR
novel_circ_0020875	25	MTR
novel_circ_0020876	25	MTR
novel_circ_0020877	25	MTR
novel_circ_0020880	25	URB2
novel_circ_0020881	25	MTR
novel_circ_0020882	25	MTR
novel_circ_0020883	25	MTR
novel_circ_0020884	25	MTR
novel_circ_0020888	25	MTR
novel_circ_0020890	26	ARHGEF10
novel_circ_0020892	26	TENM3
novel_circ_0020893	26	TENM3
novel_circ_0020894	26	DCTD
novel_circ_0020896	26	WWC2
novel_circ_0020897	26	WWC2
novel_circ_0020900	26	RWDD4
novel_circ_0020901	26	TRAPPC11
novel_circ_0020904	26	TRAPPC11
novel_circ_0020905	26	TRAPPC11
novel_circ_0020910	26	ENPP6
novel_circ_0020912	26	IRF2
novel_circ_0020913	26	IRF2
novel_circ_0020914	26	IRF2
novel_circ_0020919	26	SNX25
novel_circ_0020920	26	SNX25
novel_circ_0020921	26	SNX25
novel_circ_0020925	26	SNX25
novel_circ_0020926	26	SNX25
novel_circ_0020927	26	SNX25
novel_circ_0020929	26	SNX25
novel_circ_0020930	26	UFSP2
novel_circ_0020931	26	UFSP2
novel_circ_0020932	26	UFSP2
novel_circ_0020933	26	C4orf47
novel_circ_0020934	26	C4orf47
novel_circ_0020944	26	FAM149A
novel_circ_0020945	26	FAM149A
novel_circ_0020946	26	FAM149A
novel_circ_0020947	26	FAM149A
novel_circ_0020948	26	FAM149A
novel_circ_0020949	26	FAM149A
novel_circ_0020950	26	FAM149A
novel_circ_0020951	26	FAM149A
novel_circ_0020952	26	FAM149A
novel_circ_0020953	26	FAM149A
novel_circ_0020954	26	FAM149A
novel_circ_0020956	26	CYP4V2
novel_circ_0020957	26	FAT1
novel_circ_0020958	26	FAT1
novel_circ_0020959	26	FAT1
novel_circ_0020960	26	FAT1
novel_circ_0020962	26	FAT1
novel_circ_0020975	26	ASAH1
novel_circ_0020976	26	ASAH1
novel_circ_0020978	26	PCM1
novel_circ_0020979	26	PCM1
novel_circ_0020980	26	PCM1
novel_circ_0020981	26	PCM1
novel_circ_0020982	26	PCM1
novel_circ_0020984	26	PCM1
novel_circ_0020985	26	PCM1
novel_circ_0020986	26	PCM1
novel_circ_0020987	26	PCM1
novel_circ_0020988	26	PCM1
novel_circ_0020989	26	PCM1
novel_circ_0020990	26	PCM1
novel_circ_0020991	26	PCM1
novel_circ_0020992	26	FGL1
novel_circ_0020995	26	MTUS1
novel_circ_0020997	26	MTUS1
novel_circ_0020998	26	MTUS1
novel_circ_0020999	26	MTUS1
novel_circ_0021000	26	PDGFRL
novel_circ_0021001	26	SLC7A2
novel_circ_0021002	26	SLC7A2
novel_circ_0021003	26	SLC7A2
novel_circ_0021004	26	VPS37A
novel_circ_0021005	26	VPS37A
novel_circ_0021006	26	VPS37A
novel_circ_0021013	26	MICU3
novel_circ_0021016	26	MICU3
novel_circ_0021017	26	MICU3
novel_circ_0021020	26	MICU3
novel_circ_0021022	26	MICU3
novel_circ_0021023	26	MICU3
novel_circ_0021025	26	MICU3
novel_circ_0021028	26	MICU3
novel_circ_0021029	26	MICU3
novel_circ_0021030	26	MICU3
novel_circ_0021040	26	TUSC3
novel_circ_0021041	26	TUSC3
novel_circ_0021042	26	TUSC3
novel_circ_0021043	26	TUSC3
novel_circ_0021045	26	TUSC3
novel_circ_0021046	26	TUSC3
novel_circ_0021047	26	TUSC3
novel_circ_0021048	26	TUSC3
novel_circ_0021049	26	TUSC3
novel_circ_0021058	26	DLC1
novel_circ_0021060	26	DLC1
novel_circ_0021064	26	DLC1
novel_circ_0021067	26	KIAA1456
novel_circ_0021068	26	KIAA1456
novel_circ_0021069	26	KIAA1456
novel_circ_0021070	26	LONRF1
novel_circ_0021071	26	LONRF1
novel_circ_0021072	26	LONRF1
novel_circ_0021074	26	MFHAS1
novel_circ_0021075	26	ERI1
novel_circ_0021076	26	ERI1
novel_circ_0021080	26	TNKS
novel_circ_0021083	26	TNKS
novel_circ_0021084	26	TNKS
novel_circ_0021085	26	TNKS
novel_circ_0021088	26	SARAF
novel_circ_0021089	26	SARAF
novel_circ_0021091	26	SARAF
novel_circ_0021092	26	DCTN6
novel_circ_0021112	26	GTF2E2
novel_circ_0021116	26	GTF2E2
novel_circ_0021117	26	GTF2E2
novel_circ_0021118	26	TEX15
novel_circ_0021119	26	TEX15
novel_circ_0021121	26	TEX15
novel_circ_0021126	26	TEX15
novel_circ_0021128	26	WRN
novel_circ_0021130	26	WRN
novel_circ_0021132	26	WRN
novel_circ_0021133	26	WRN
novel_circ_0021136	26	WRN
novel_circ_0021137	26	WRN
novel_circ_0021138	26	WRN
novel_circ_0021139	26	WRN
novel_circ_0021141	26	WRN
novel_circ_0021142	26	WRN
novel_circ_0021143	26	WRN
novel_circ_0021144	26	WRN
novel_circ_0021145	26	WRN
novel_circ_0021146	26	WRN
novel_circ_0021160	26	FUT10
novel_circ_0021161	26	FUT10
novel_circ_0021162	26	FUT10
novel_circ_0021164	26	TTI2
novel_circ_0021165	26	TTI2
novel_circ_0021166	26	UNC5D
novel_circ_0021169	26	ERLIN2
novel_circ_0021170	26	ERLIN2
novel_circ_0021172	26	RAB11FIP1
novel_circ_0021173	26	EIF4EBP1
novel_circ_0021174	26	ASH2L
novel_circ_0021175	26	ASH2L
novel_circ_0021176	26	DDHD2
novel_circ_0021182	26	NSD3
novel_circ_0021183	26	NSD3
novel_circ_0021187	26	NSD3
novel_circ_0021188	26	NSD3
novel_circ_0021189	26	NSD3
novel_circ_0021190	26	NSD3
novel_circ_0021191	26	NSD3
novel_circ_0021192	26	NSD3
novel_circ_0021193	26	NSD3
novel_circ_0021194	26	NSD3
novel_circ_0021195	26	NSD3
novel_circ_0021194	26	NSD3
novel_circ_0021195	26	NSD3
novel_circ_0021196	26	NSD3
novel_circ_0021197	26	NSD3
novel_circ_0021199	26	FGFR1
novel_circ_0021201	26	TACC1
novel_circ_0021204	26	TACC1
novel_circ_0021205	26	TACC1
novel_circ_0021206	26	TACC1
novel_circ_0021207	26	TACC1
novel_circ_0021208	26	TACC1
novel_circ_0021209	26	PLEKHA2
novel_circ_0021212	26	ADAM9
novel_circ_0021214	26	ADAM9
novel_circ_0021215	26	ADAM9
novel_circ_0021216	26	ADAM9
novel_circ_0021217	26	ADAM9
novel_circ_0021223	26	ADAM9
novel_circ_0021224	26	ADAM9
novel_circ_0021225	26	ADAM9
novel_circ_0021227	26	ADAM9
novel_circ_0021228	26	ADAM9
novel_circ_0021229	26	ADAM9
novel_circ_0021230	26	ADAM9
novel_circ_0021231	26	ADAM9
novel_circ_0021232	26	ADAM9
novel_circ_0021235	26	ADAM9
novel_circ_0021238	26	ADAM9
novel_circ_0021240	26	ADAM32
novel_circ_0021244	26	ADAM32
novel_circ_0021246	26	ADAM32
novel_circ_0021247	26	ADAM32
novel_circ_0021249	26	ADAM32
novel_circ_0021253	26	ADAM32
novel_circ_0021254	26	ADAM32
novel_circ_0021263	26	ADAM18
novel_circ_0021266	26	ADAM18
novel_circ_0021271	26	KAT6A
novel_circ_0021280	26	POLB
novel_circ_0021284	26	POLB
novel_circ_0021287	26	SLC20A2
novel_circ_0021288	26	RNF170
novel_circ_0021289	26	RNF170
novel_circ_0021291	26	RNF170
novel_circ_0021292	26	HOOK3
novel_circ_0021302	26	HOOK3
novel_circ_0021303	26	HOOK3
novel_circ_0021305	26	HOOK3
novel_circ_0021306	26	HOOK3
novel_circ_0021312	26	HOOK3
novel_circ_0021313	26	HOOK3
novel_circ_0021314	26	HOOK3
novel_circ_0021315	26	FNTA
novel_circ_0021318	26	INTS10
novel_circ_0021319	26	INTS10
novel_circ_0021321	26	INTS10
novel_circ_0021322	26	INTS10
novel_circ_0021323	26	INTS10
novel_circ_0021324	26	INTS10
novel_circ_0021328	26	CSGALNACT1
novel_circ_0021329	26	CSGALNACT1
novel_circ_0021330	26	CSGALNACT1
novel_circ_0021331	26	CSGALNACT1
novel_circ_0021335	26	PSD3
novel_circ_0021337	26	PSD3
novel_circ_0021339	26	PSD3
novel_circ_0021342	26	PSD3
novel_circ_0021343	26	PSD3
novel_circ_0021345	26	PSD3
novel_circ_0021346	26	PSD3
novel_circ_0021352	26	PSD3
novel_circ_0021354	26	PSD3
novel_circ_0021358	26	PSD3
novel_circ_0021365	26	PSD3
novel_circ_0021366	26	PSD3
novel_circ_0021368	26	NGLY1
novel_circ_0021369	26	NGLY1
novel_circ_0021371	26	NGLY1
novel_circ_0021372	26	NGLY1
novel_circ_0021373	26	NGLY1
novel_circ_0021374	26	NGLY1
novel_circ_0021375	26	NGLY1
novel_circ_0021376	26	NGLY1
novel_circ_0021377	26	NGLY1
novel_circ_0021378	26	TOP2B
novel_circ_0021379	26	TOP2B
novel_circ_0021380	26	TOP2B
novel_circ_0021381	26	TOP2B
novel_circ_0021382	26	TOP2B
novel_circ_0021383	26	TOP2B
novel_circ_0021384	26	TOP2B
novel_circ_0021385	26	TOP2B
novel_circ_0021386	26	TOP2B
novel_circ_0021388	26	TOP2B
novel_circ_0021389	26	TOP2B
novel_circ_0021391	26	TOP2B
novel_circ_0021392	26	TOP2B
novel_circ_0021393	26	TOP2B
novel_circ_0021394	26	RARB
novel_circ_0021395	26	RARB
novel_circ_0021399	26	THRB
novel_circ_0021400	26	THRB
novel_circ_0021401	26	THRB
novel_circ_0021402	26	THRB
novel_circ_0021404	26	NR1D2
novel_circ_0021405	26	NR1D2
novel_circ_0021419	26	ZNF385D
novel_circ_0021426	26	ANGPT2
novel_circ_0021427	26	AGPAT5
novel_circ_0021429	26	AGPAT5
novel_circ_0021430	26	AGPAT5
novel_circ_0021431	26	AGPAT5
novel_circ_0021434	26	GPM6A
novel_circ_0021435	26	GPM6A
novel_circ_0021436	26	GPM6A
novel_circ_0021438	26	WDR17
novel_circ_0021439	26	WDR17
novel_circ_0021440	26	WDR17
novel_circ_0021441	26	WDR17
novel_circ_0021442	26	WDR17
novel_circ_0021443	26	WDR17
novel_circ_0021444	26	WDR17
novel_circ_0021445	26	WDR17
novel_circ_0021447	26	WDR17
novel_circ_0021448	26	WDR17
novel_circ_0021449	26	WDR17
novel_circ_0021450	26	WDR17
novel_circ_0021451	26	WDR17
novel_circ_0021452	26	WDR17
novel_circ_0021453	26	WDR17
novel_circ_0021454	26	VEGFC
novel_circ_0021455	26	VEGFC
novel_circ_0021456	26	VEGFC
novel_circ_0021457	26	VEGFC
novel_circ_0021458	26	VEGFC
novel_circ_0021460	26	VEGFC
novel_circ_0021462	26	NEIL3
novel_circ_0021463	26	NEIL3
novel_circ_0021465	26	AGA
novel_circ_0021466	26	AGA
novel_circ_0021467	26	AGA
novel_circ_0016394	20	MAPK14
novel_circ_0016396	20	MAPK14
novel_circ_0016397	20	MAPK14
novel_circ_0016405	20	MAPK14
novel_circ_0016406	20	MAPK14
novel_circ_0016407	20	BRPF3
novel_circ_0016418	20	C6orf89
novel_circ_0016419	20	C6orf89
novel_circ_0016421	20	C6orf89
novel_circ_0016422	20	C6orf89
novel_circ_0016423	20	C6orf89
novel_circ_0016424	20	TBC1D22B
novel_circ_0016425	20	TBC1D22B
novel_circ_0016426	20	TBC1D22B
novel_circ_0016428	20	RNF8
novel_circ_0016429	20	CMTR1
novel_circ_0016432	20	CMTR1
novel_circ_0016450	20	GLO1
novel_circ_0016451	20	GLO1
novel_circ_0016452	20	GLO1
novel_circ_0016453	20	GLO1
novel_circ_0016454	20	GLO1
novel_circ_0016455	20	DNAH8
novel_circ_0016456	20	DNAH8
novel_circ_0016457	20	DNAH8
novel_circ_0016458	20	KIF6
novel_circ_0016461	20	DAAM2
novel_circ_0016462	20	DAAM2
novel_circ_0016465	20	DAAM2
novel_circ_0016469	20	GUCA1B
novel_circ_0016471	20	TRERF1
novel_circ_0016475	20	UBR2
novel_circ_0016476	20	UBR2
novel_circ_0016478	20	UBR2
novel_circ_0016479	20	UBR2
novel_circ_0016480	20	UBR2
novel_circ_0016481	20	UBR2
novel_circ_0016482	20	UBR2
novel_circ_0016483	20	UBR2
novel_circ_0016484	20	UBR2
novel_circ_0016486	20	UBR2
novel_circ_0016487	20	UBR2
novel_circ_0016488	20	UBR2
novel_circ_0016489	20	UBR2
novel_circ_0016490	20	UBR2
novel_circ_0016491	20	UBR2
novel_circ_0016492	20	UBR2
novel_circ_0016494	20	BICRAL
novel_circ_0016495	20	BICRAL
novel_circ_0016496	20	BICRAL
novel_circ_0016498	20	PEX6
novel_circ_0016500	20	PTK7
novel_circ_0016501	20	XPO5
novel_circ_0016502	20	XPO5
novel_circ_0016503	20	XPO5
novel_circ_0016504	20	XPO5
novel_circ_0016506	20	POLH
novel_circ_0016507	20	POLH
novel_circ_0016508	20	POLH
novel_circ_0016512	20	SLC29A1
novel_circ_0016513	20	CDC5L
novel_circ_0016520	20	SUPT3H
novel_circ_0016522	20	SUPT3H
novel_circ_0016524	20	SUPT3H
novel_circ_0016529	20	SUPT3H
novel_circ_0016534	20	SUPT3H
novel_circ_0016535	20	SUPT3H
novel_circ_0016537	20	SUPT3H
novel_circ_0016540	20	RUNX2
novel_circ_0016542	20	RUNX2
novel_circ_0016543	20	RUNX2
novel_circ_0016544	20	CLIC5
novel_circ_0016546	20	RCAN2
novel_circ_0016548	20	CYP39A1
novel_circ_0016549	20	CYP39A1
novel_circ_0016550	20	CYP39A1
novel_circ_0016551	20	CYP39A1
novel_circ_0016552	20	CYP39A1
novel_circ_0016553	20	SLC25A27
novel_circ_0016555	20	SLC25A27
novel_circ_0016556	20	SLC25A27
novel_circ_0016558	20	SLC25A27
novel_circ_0016559	20	PLA2G7
novel_circ_0016560	20	PLA2G7
novel_circ_0016561	20	PLA2G7
novel_circ_0016562	20	PLA2G7
novel_circ_0016563	20	PLA2G7
novel_circ_0016567	20	ADGRF5
novel_circ_0016568	20	ADGRF5
novel_circ_0016570	20	ADGRF5
novel_circ_0016571	20	TNFRSF21
novel_circ_0016572	20	CD2AP
novel_circ_0016573	20	CD2AP
novel_circ_0016574	20	CD2AP
novel_circ_0016575	20	CD2AP
novel_circ_0016577	20	CD2AP
novel_circ_0016578	20	CD2AP
novel_circ_0016580	20	PTCHD4
novel_circ_0016581	20	MUT
novel_circ_0016582	20	MUT
novel_circ_0016583	20	MUT
novel_circ_0016584	20	MUT
novel_circ_0016585	20	MUT
novel_circ_0016588	20	GSTA4
novel_circ_0016589	20	GSTA4
novel_circ_0016590	20	ICK
novel_circ_0016591	20	FBXO9
novel_circ_0016593	20	ELOVL5
novel_circ_0016599	20	EHMT2
novel_circ_0016601	20	PRRC2A
novel_circ_0016603	20	DDX39B
novel_circ_0016611	20	GTF2H4
novel_circ_0016622	20	PRIM2
novel_circ_0016623	20	PRIM2
novel_circ_0016628	20	ZNF311
novel_circ_0016629	20	PRIM2
novel_circ_0016631	20	PRIM2
novel_circ_0016633	20	PRIM2
novel_circ_0016634	20	RAB23
novel_circ_0016635	20	RAB23
novel_circ_0016636	20	RAB23
novel_circ_0016637	20	RAB23
novel_circ_0016639	20	RAB23
novel_circ_0016641	20	RAB23
novel_circ_0016643	20	CARMIL1
novel_circ_0016644	20	CARMIL1
novel_circ_0016645	20	CARMIL1
novel_circ_0016646	20	CARMIL1
novel_circ_0016647	20	CARMIL1
novel_circ_0016648	20	CARMIL1
novel_circ_0016649	20	CARMIL1
novel_circ_0016650	20	CARMIL1
novel_circ_0016651	20	CARMIL1
novel_circ_0016653	20	CARMIL1
novel_circ_0016654	20	CARMIL1
novel_circ_0016655	20	CARMIL1
novel_circ_0016656	20	CARMIL1
novel_circ_0016657	20	CARMIL1
novel_circ_0016658	20	CARMIL1
novel_circ_0016666	20	CARMIL1
novel_circ_0016670	20	CARMIL1
novel_circ_0016671	20	CARMIL1
novel_circ_0016672	20	CARMIL1
novel_circ_0016674	20	CARMIL1
novel_circ_0016675	20	CARMIL1
novel_circ_0016679	20	CARMIL1
novel_circ_0016687	20	CARMIL1
novel_circ_0016720	20	TDP2
novel_circ_0016721	20	KIAA0319
novel_circ_0016723	20	GPLD1
novel_circ_0016724	20	GPLD1
novel_circ_0016725	20	MRS2
novel_circ_0016726	20	MRS2
novel_circ_0016727	20	MRS2
novel_circ_0016728	20	MRS2
novel_circ_0016729	20	MRS2
novel_circ_0016731	20	MRS2
novel_circ_0016732	20	MRS2
novel_circ_0016733	20	MRS2
novel_circ_0016738	20	DCDC2
novel_circ_0016739	20	BEND6
novel_circ_0016740	20	BEND6
novel_circ_0016768	20	CDKAL1
novel_circ_0016777	20	CDKAL1
novel_circ_0016778	20	CDKAL1
novel_circ_0016779	20	CDKAL1
novel_circ_0016782	20	CDKAL1
novel_circ_0016783	20	CDKAL1
novel_circ_0016784	20	CDKAL1
novel_circ_0016785	20	CDKAL1
novel_circ_0016786	20	E2F3
novel_circ_0016788	20	MBOAT1
novel_circ_0016789	20	MBOAT1
novel_circ_0016790	20	MBOAT1
novel_circ_0016805	20	KDM1B
novel_circ_0016806	20	KDM1B
novel_circ_0016807	20	TPMT
novel_circ_0016808	20	TPMT
novel_circ_0016812	20	KIF13A
novel_circ_0016813	20	KIF13A
novel_circ_0016814	20	KIF13A
novel_circ_0016816	20	KIF13A
novel_circ_0016817	20	KIF13A
novel_circ_0016818	20	KIF13A
novel_circ_0016819	20	KIF13A
novel_circ_0016820	20	KIF13A
novel_circ_0016821	20	KIF13A
novel_circ_0016822	20	KIF13A
novel_circ_0016823	20	KIF13A
novel_circ_0016824	20	KIF13A
novel_circ_0016825	20	KIF13A
novel_circ_0016826	20	KIF13A
novel_circ_0016828	20	KIF13A
novel_circ_0016829	20	KIF13A
novel_circ_0016830	20	KIF13A
novel_circ_0016831	20	KIF13A
novel_circ_0016833	20	KIF13A
novel_circ_0016835	20	NUP153
novel_circ_0016836	20	NUP153
novel_circ_0016837	20	NUP153
novel_circ_0016838	20	NUP153
novel_circ_0016839	20	NUP153
novel_circ_0016840	20	NUP153
novel_circ_0016842	20	NUP153
novel_circ_0016843	20	NUP153
novel_circ_0016844	20	NUP153
novel_circ_0016846	20	CAP2
novel_circ_0016847	20	CAP2
novel_circ_0016848	20	CAP2
novel_circ_0016849	20	CAP2
novel_circ_0016851	20	CAP2
novel_circ_0016853	20	CAP2
novel_circ_0016854	20	CAP2
novel_circ_0016868	20	GMPR
novel_circ_0016869	20	GMPR
novel_circ_0016872	20	DTNBP1
novel_circ_0016873	20	DTNBP1
novel_circ_0016877	20	JARID2
novel_circ_0016878	20	JARID2
novel_circ_0016879	20	JARID2
novel_circ_0016881	20	JARID2
novel_circ_0016883	20	JARID2
novel_circ_0016884	20	JARID2
novel_circ_0016890	20	RANBP9
novel_circ_0016892	20	RANBP9
novel_circ_0016893	20	RANBP9
novel_circ_0016894	20	RANBP9
novel_circ_0016901	20	TBC1D7
novel_circ_0016902	20	TBC1D7
novel_circ_0016903	20	PHACTR1
novel_circ_0016904	20	PHACTR1
novel_circ_0016906	20	COL21A1
novel_circ_0016907	20	COL21A1
novel_circ_0016913	20	HIVEP1
novel_circ_0016914	20	NEDD9
novel_circ_0016915	20	NEDD9
novel_circ_0016916	20	SYCP2L
novel_circ_0016921	20	SLC35B3
novel_circ_0016924	20	SLC35B3
novel_circ_0016935	20	RREB1
novel_circ_0016936	20	RREB1
novel_circ_0016937	20	RREB1
novel_circ_0016938	20	RREB1
novel_circ_0016939	20	F13A1
novel_circ_0016940	20	F13A1
novel_circ_0016941	20	F13A1
novel_circ_0016957	20	PRPF4B
novel_circ_0016958	20	PRPF4B
novel_circ_0016959	20	PRPF4B
novel_circ_0016960	20	PXDC1
novel_circ_0016963	20	RIPK1
novel_circ_0016965	20	RIPK1
novel_circ_0016966	20	RIPK1
novel_circ_0016970	20	HMGCLL1
novel_circ_0016974	20	GMDS
novel_circ_0016975	20	GMDS
novel_circ_0016976	20	GMDS
novel_circ_0016977	20	GMDS
novel_circ_0016981	20	EXOC2
novel_circ_0016982	20	EXOC2
novel_circ_0016984	20	EXOC2
novel_circ_0016986	20	EXOC2
novel_circ_0016988	20	EXOC2
novel_circ_0016993	20	EXOC2
novel_circ_0016994	20	EXOC2
novel_circ_0016998	20	EXOC2
novel_circ_0016999	20	EXOC2
novel_circ_0017001	20	EXOC2
novel_circ_0017003	20	EXOC2
novel_circ_0017005	20	IRF4
novel_circ_0017012	20	LRRC1
novel_circ_0017015	20	LRRC1
novel_circ_0017019	20	GCLC
novel_circ_0017020	20	TAP1
novel_circ_0017021	20	BRD2
novel_circ_0017022	20	BRD2
novel_circ_0017042	20	KHDRBS2
novel_circ_0017044	20	UHRF1BP1
novel_circ_0017045	20	UHRF1BP1
novel_circ_0017046	20	ANKS1A
novel_circ_0017048	20	ANKS1A
novel_circ_0017049	20	ANKS1A
novel_circ_0017050	20	ANKS1A
novel_circ_0017053	20	ANKS1A
novel_circ_0017054	20	TCP11
novel_circ_0017056	20	SCUBE3
novel_circ_0017057	20	FANCE
novel_circ_0017058	20	TEAD3
novel_circ_0017060	20	FKBP5
novel_circ_0017065	20	FKBP5
novel_circ_0017066	20	FKBP5
novel_circ_0017077	20	SRPK1
novel_circ_0017079	20	SRPK1
novel_circ_0017080	20	SRPK1
novel_circ_0017081	20	SRPK1
novel_circ_0017082	20	SRPK1
novel_circ_0017083	20	SRPK1
novel_circ_0017088	21	DLG2
novel_circ_0017092	21	DLG2
novel_circ_0017120	21	PCF11
novel_circ_0017121	21	SLC36A4
novel_circ_0017122	21	SLC36A4
novel_circ_0017123	21	SLC36A4
novel_circ_0017124	21	SLC36A4
novel_circ_0017125	21	SLC36A4
novel_circ_0017130	21	RAB30
novel_circ_0017131	21	PRCP
novel_circ_0017132	21	PRCP
novel_circ_0017137	21	FAT3
novel_circ_0017138	21	FAT3
novel_circ_0017139	21	FAT3
novel_circ_0017141	21	FAT3
novel_circ_0017142	21	NARS2
novel_circ_0017146	21	NARS2
novel_circ_0017147	21	NARS2
novel_circ_0017148	21	NARS2
novel_circ_0017149	21	NARS2
novel_circ_0017150	21	NARS2
novel_circ_0017152	21	NARS2
novel_circ_0017156	21	NARS2
novel_circ_0017158	21	NARS2
novel_circ_0017159	21	NARS2
novel_circ_0017161	21	NARS2
novel_circ_0017163	21	NARS2
novel_circ_0017164	21	NARS2
novel_circ_0017166	21	NARS2
novel_circ_0017175	21	INTS4
novel_circ_0017176	21	INTS4
novel_circ_0017177	21	INTS4
novel_circ_0017178	21	INTS4
novel_circ_0017179	21	INTS4
novel_circ_0017180	21	INTS4
novel_circ_0017181	21	INTS4
novel_circ_0017182	21	INTS4
novel_circ_0017184	21	INTS4
novel_circ_0017185	21	INTS4
novel_circ_0017186	21	INTS4
novel_circ_0017188	21	INTS4
[truncated: 18,863 more rows]
