# Supplementary material for: Comprehensive Analysis of Differentially Expressed CircRNAs in the Ovaries of Low- and High-Fertility Sheep
Source: Animals (Basel). 2023 Jan 9;13(2):236. doi: 10.3390/ani13020236 (PMC9854751; doi:10.3390/ani13020236)
Supplement: Supplementary file 1 [file animals-13-00236-s001.zip › Supplementary table S3.xlsx]

## Sheet: Sheet1
circRNA-ID	log2FC	pvalue
novel_circ_0005385	5.349	7.3055e-25
novel_circ_0016629	3.557	2.7329e-26
novel_circ_0031589	3.1178	9.3371e-08
novel_circ_0000276	3.0531	1.8237e-07
novel_circ_0005387	2.8982	8.7099e-07
novel_circ_0005389	2.891	9.131e-07
novel_circ_0040192	2.3751	6.5306e-05
novel_circ_0005391	2.1157	0.00036815
novel_circ_0005628	2.0794	0.00046021
novel_circ_0026641	1.9304	4.5986e-07
novel_circ_0021407	1.7843	0.00098137
novel_circ_0013986	1.6888	0.0038421
novel_circ_0005393	1.6621	0.0044058
novel_circ_0039873	1.642	4.4004e-05
novel_circ_0008501	1.6112	0.0045459
novel_circ_0032987	1.6104	0.00013863
novel_circ_0038624	1.5986	0.0059306
novel_circ_0021406	1.5519	0.0070617
novel_circ_0033028	1.5065	0.0089423
novel_circ_0011855	1.487	0.0036368
novel_circ_0036440	1.4202	0.016512
novel_circ_0007930	1.4135	0.0012607
novel_circ_0026639	1.4007	0.017178
novel_circ_0023023	1.3974	0.016141
novel_circ_0037762	1.3819	0.00017134
novel_circ_0016759	1.3733	0.0079546
novel_circ_0031403	1.3268	0.025527
novel_circ_0014142	1.3195	0.01707
novel_circ_0028977	1.3123	0.01933
novel_circ_0007509	1.3083	0.020279
novel_circ_0012515	1.279	0.02272
novel_circ_0010361	1.2786	0.022398
novel_circ_0036441	1.2738	0.007743
novel_circ_0040341	1.2668	0.023573
novel_circ_0010507	1.2639	0.023916
novel_circ_0033880	1.2451	0.025521
novel_circ_0037464	1.2309	0.0059051
novel_circ_0008476	1.224	0.00080512
novel_circ_0034095	1.2231	0.027913
novel_circ_0032347	1.2083	0.02621
novel_circ_0017075	1.206	0.00026318
novel_circ_0016058	1.2009	0.0020257
novel_circ_0004103	1.1825	0.044227
novel_circ_0035473	1.1767	0.028233
novel_circ_0032966	1.1697	0.033914
novel_circ_0022354	1.164	0.037848
novel_circ_0008041	1.163	0.032998
novel_circ_0005995	1.1629	0.034737
novel_circ_0025444	1.1606	0.021826
novel_circ_0037487	1.1566	0.048748
novel_circ_0026705	1.1497	0.037747
novel_circ_0015369	1.145	0.036796
novel_circ_0034224	1.1397	0.037693
novel_circ_0030211	1.1395	0.040127
novel_circ_0032655	1.1369	0.038071
novel_circ_0003602	1.1323	0.038497
novel_circ_0008546	1.1264	0.038773
novel_circ_0008117	1.123	5.2491e-07
novel_circ_0012400	1.1194	0.040574
novel_circ_0022349	1.1148	0.0411
novel_circ_0014401	1.1038	0.041324
novel_circ_0017514	1.0768	0.046753
novel_circ_0026764	1.0765	0.046672
novel_circ_0030427	1.0736	0.047293
novel_circ_0039352	1.0736	0.047293
novel_circ_0008385	1.0681	0.048172
novel_circ_0017655	1.0668	0.0021214
novel_circ_0027336	1.0547	0.02717
novel_circ_0012676	1.0544	0.031927
novel_circ_0018428	1.0472	6.6514e-05
novel_circ_0024592	1.0372	0.044373
novel_circ_0026773	1.0372	0.04021
novel_circ_0015864	1.0143	0.025579
novel_circ_0027412	1.0031	0.029451
novel_circ_0032672	1.0004	0.045504
novel_circ_0020570	-1.0032	0.0025841
novel_circ_0011620	-1.0049	0.032862
novel_circ_0018327	-1.0067	0.0083449
novel_circ_0000935	-1.0133	0.040466
novel_circ_0036827	-1.0297	0.0047226
novel_circ_0018361	-1.0427	0.043198
novel_circ_0011011	-1.0446	0.040503
novel_circ_0000458	-1.0471	0.048925
novel_circ_0036749	-1.049	0.049279
novel_circ_0031761	-1.0562	0.0002839
novel_circ_0005945	-1.061	0.047284
novel_circ_0041320	-1.061	0.047284
novel_circ_0000747	-1.063	0.046979
novel_circ_0010886	-1.063	0.046979
novel_circ_0029717	-1.0641	0.043541
novel_circ_0007966	-1.0679	0.045611
novel_circ_0032772	-1.0803	0.044276
novel_circ_0026269	-1.0806	0.017958
novel_circ_0024453	-1.0839	0.029841
novel_circ_0000127	-1.089	0.043008
novel_circ_0036345	-1.0927	0.042327
novel_circ_0039860	-1.0927	0.042327
novel_circ_0033102	-1.0938	0.04228
novel_circ_0006200	-1.1048	0.040778
novel_circ_0012632	-1.1071	0.039852
novel_circ_0039781	-1.1111	2.2611e-05
novel_circ_0040368	-1.1176	0.039017
novel_circ_0011846	-1.125	0.037984
novel_circ_0021920	-1.1251	0.027302
novel_circ_0033222	-1.1266	0.0026532
novel_circ_0035481	-1.1295	0.036822
novel_circ_0007224	-1.1369	0.038982
novel_circ_0003094	-1.1501	0.039175
novel_circ_0012322	-1.1532	0.034364
novel_circ_0017944	-1.1532	0.034364
novel_circ_0032091	-1.1565	0.042157
novel_circ_0023837	-1.1578	0.033876
novel_circ_0005796	-1.1649	0.032961
novel_circ_0040512	-1.1746	0.038024
novel_circ_0013930	-1.1998	0.042822
novel_circ_0028936	-1.2022	0.039154
novel_circ_0008814	-1.2023	0.0076731
novel_circ_0007965	-1.2025	0.04321
novel_circ_0004886	-1.2059	0.038493
novel_circ_0036659	-1.2111	0.027966
novel_circ_0033045	-1.2166	0.037649
novel_circ_0013695	-1.2246	0.00036795
novel_circ_0016113	-1.2251	0.01713
novel_circ_0040508	-1.2271	0.018081
novel_circ_0009302	-1.228	0.020375
novel_circ_0008291	-1.2345	0.034554
novel_circ_0023345	-1.2419	0.011598
novel_circ_0014885	-1.2462	0.03432
novel_circ_0036577	-1.2557	0.03347
novel_circ_0015356	-1.2599	0.023338
novel_circ_0020515	-1.264	0.030075
novel_circ_0022557	-1.271	0.02238
novel_circ_0034246	-1.2753	0.029615
novel_circ_0003851	-1.2796	0.0035143
novel_circ_0024873	-1.2904	0.020774
novel_circ_0039178	-1.2969	0.026778
novel_circ_0010516	-1.2977	0.02015
novel_circ_0032244	-1.2978	0.020169
novel_circ_0020063	-1.2988	0.005283
novel_circ_0019713	-1.3047	0.023297
novel_circ_0025228	-1.3067	0.0053601
novel_circ_0027166	-1.3107	0.024756
novel_circ_0015839	-1.3118	0.019139
novel_circ_0039817	-1.3133	1.512e-05
novel_circ_0017947	-1.314	0.020895
novel_circ_0004427	-1.3178	0.018305
novel_circ_0009927	-1.3237	0.025879
novel_circ_0034318	-1.3264	0.017699
novel_circ_0018410	-1.3337	0.0074072
novel_circ_0039296	-1.3441	0.0062641
novel_circ_0015526	-1.3471	0.023359
novel_circ_0008302	-1.3484	0.010125
novel_circ_0017949	-1.357	0.016002
novel_circ_0028493	-1.3691	0.016958
novel_circ_0032380	-1.3766	0.016796
novel_circ_0010367	-1.3793	0.0054122
novel_circ_0034191	-1.3797	0.019269
novel_circ_0038579	-1.3887	0.00014956
novel_circ_0003810	-1.395	0.0043166
novel_circ_0027540	-1.3963	0.016058
novel_circ_0001047	-1.4186	0.015672
novel_circ_0001425	-1.419	0.010474
novel_circ_0031818	-1.4311	0.016144
novel_circ_0002317	-1.4531	0.010819
novel_circ_0040269	-1.4679	0.00050495
novel_circ_0026682	-1.483	0.0095174
novel_circ_0016104	-1.4852	0.009401
novel_circ_0030404	-1.5194	0.010649
novel_circ_0009713	-1.5217	0.010482
novel_circ_0000136	-1.6007	0.00097005
novel_circ_0034617	-1.6211	0.0039018
novel_circ_0000886	-1.7	0.0034101
novel_circ_0002318	-1.7678	0.0025198
novel_circ_0024392	-1.8049	0.0020187
novel_circ_0000450	-1.8715	0.0014238
novel_circ_0039862	-1.9187	0.0011403
novel_circ_0040351	-1.9231	0.0010761
novel_circ_0011939	-1.9543	0.00090568
novel_circ_0007964	-2.0108	0.00034734
novel_circ_0005458	-6.7108	1.4586e-45
