# Supplementary material for: Comprehensive Analysis of Differentially Expressed CircRNAs in the Ovaries of Low- and High-Fertility Sheep
Source: Animals (Basel). 2023 Jan 9;13(2):236. doi: 10.3390/ani13020236 (PMC9854751; doi:10.3390/ani13020236)
Supplement: Supplementary file 1 [file animals-13-00236-s001.zip › Supplementary table S4.xlsx]

## Sheet: Sheet1
miRNA_ID	circRNA_ID
bta-miR-103	novel_circ_0040508
bta-miR-103	novel_circ_0026705
bta-miR-103	novel_circ_0031761
bta-miR-103	novel_circ_0037762
bta-miR-103	novel_circ_0000136
bta-miR-107	novel_circ_0040508
bta-miR-107	novel_circ_0026705
bta-miR-107	novel_circ_0031761
bta-miR-107	novel_circ_0037762
bta-miR-107	novel_circ_0000136
bta-miR-10b	novel_circ_0040192
bta-miR-10b	novel_circ_0015839
bta-miR-10b	novel_circ_0016058
bta-miR-10b	novel_circ_0016113
bta-miR-10b	novel_circ_0008385
bta-miR-10b	novel_circ_0010361
bta-miR-125a	novel_circ_0040508
bta-miR-125a	novel_circ_0040512
bta-miR-125a	novel_circ_0019713
bta-miR-125a	novel_circ_0017655
bta-miR-125a	novel_circ_0011939
bta-miR-125a	novel_circ_0024592
bta-miR-125a	novel_circ_0031403
bta-miR-125a	novel_circ_0037487
bta-miR-125a	novel_circ_0000458
bta-miR-125a	novel_circ_0011620
bta-miR-125a	novel_circ_0009713
bta-miR-129	novel_circ_0025444
bta-miR-129	novel_circ_0028493
bta-miR-129	novel_circ_0021920
bta-miR-129	novel_circ_0024592
bta-miR-129	novel_circ_0035473
bta-miR-129	novel_circ_0039178
bta-miR-129	novel_circ_0037762
bta-miR-129	novel_circ_0000127
bta-miR-129	novel_circ_0010516
bta-miR-129-3p	novel_circ_0014885
bta-miR-129-3p	novel_circ_0016113
bta-miR-129-3p	novel_circ_0032380
bta-miR-129-3p	novel_circ_0002317
bta-miR-1298	novel_circ_0018327
bta-miR-135a	novel_circ_0016629
bta-miR-135a	novel_circ_0017944
bta-miR-135a	novel_circ_0018428
bta-miR-135a	novel_circ_0012515
bta-miR-135a	novel_circ_0013986
bta-miR-135a	novel_circ_0027412
bta-miR-135a	novel_circ_0025228
bta-miR-135a	novel_circ_0036749
bta-miR-135a	novel_circ_0000136
bta-miR-135a	novel_circ_0007930
bta-miR-135a	novel_circ_0008041
bta-miR-141	novel_circ_0024873
bta-miR-141	novel_circ_0035481
bta-miR-141	novel_circ_0034191
bta-miR-141	novel_circ_0038579
bta-miR-141	novel_circ_0039817
bta-miR-141	novel_circ_0010361
bta-miR-146b	novel_circ_0015356
bta-miR-146b	novel_circ_0032347
bta-miR-146b	novel_circ_0037464
bta-miR-146b	novel_circ_0037464
bta-miR-146b	novel_circ_0037487
bta-miR-151-3p	novel_circ_0012676
bta-miR-151-3p	novel_circ_0027412
bta-miR-151-3p	novel_circ_0033880
bta-miR-151-5p	novel_circ_0040368
bta-miR-151-5p	novel_circ_0019713
bta-miR-151-5p	novel_circ_0012400
bta-miR-151-5p	novel_circ_0027166
bta-miR-151-5p	novel_circ_0033222
bta-miR-151-5p	novel_circ_0039873
bta-miR-151-5p	novel_circ_0004427
bta-miR-151-5p	novel_circ_0003810
bta-miR-151-5p	novel_circ_0007224
bta-miR-151-5p	novel_circ_0005796
bta-miR-151-5p	novel_circ_0011620
bta-miR-15b	novel_circ_0039862
bta-miR-15b	novel_circ_0039860
bta-miR-15b	novel_circ_0020570
bta-miR-15b	novel_circ_0018410
bta-miR-15b	novel_circ_0014142
bta-miR-15b	novel_circ_0015369
bta-miR-15b	novel_circ_0023837
bta-miR-15b	novel_circ_0032772
bta-miR-15b	novel_circ_0036659
bta-miR-15b	novel_circ_0039296
bta-miR-15b	novel_circ_0000136
bta-miR-15b	novel_circ_0001047
bta-miR-15b	novel_circ_0003094
bta-miR-15b	novel_circ_0006200
bta-miR-15b	novel_circ_0005458
bta-miR-15b	novel_circ_0010516
bta-miR-17-5p	novel_circ_0012515
bta-miR-17-5p	novel_circ_0027336
bta-miR-17-5p	novel_circ_0024392
bta-miR-17-5p	novel_circ_0032347
bta-miR-17-5p	novel_circ_0038579
bta-miR-17-5p	novel_circ_0008814
bta-miR-17-5p	novel_circ_0008117
bta-miR-17-5p	novel_circ_0008117
bta-miR-17-5p	novel_circ_0010886
bta-miR-190b	novel_circ_0018410
bta-miR-190b	novel_circ_0036345
bta-miR-199b	novel_circ_0020063
bta-miR-199b	novel_circ_0012632
bta-miR-199b	novel_circ_0014885
bta-miR-199b	novel_circ_0036749
bta-miR-199b	novel_circ_0034617
bta-miR-199b	novel_circ_0004427
bta-miR-199b	novel_circ_0008385
bta-miR-199b	novel_circ_0008814
bta-miR-206	novel_circ_0018327
bta-miR-206	novel_circ_0018410
bta-miR-206	novel_circ_0015864
bta-miR-206	novel_circ_0024453
bta-miR-206	novel_circ_0038579
bta-miR-206	novel_circ_0000935
bta-miR-206	novel_circ_0004886
bta-miR-206	novel_circ_0005628
bta-miR-20a	novel_circ_0012515
bta-miR-20a	novel_circ_0027336
bta-miR-20a	novel_circ_0024392
bta-miR-20a	novel_circ_0032347
bta-miR-20a	novel_circ_0038579
bta-miR-20a	novel_circ_0008814
bta-miR-20a	novel_circ_0008117
bta-miR-20a	novel_circ_0008117
bta-miR-20a	novel_circ_0010886
bta-miR-2284ab	novel_circ_0026269
bta-miR-2284ab	novel_circ_0026639
bta-miR-2284ab	novel_circ_0026641
bta-miR-2284ab	novel_circ_0024392
bta-miR-2284ab	novel_circ_0037762
bta-miR-2284ab	novel_circ_0000935
bta-miR-2284f	novel_circ_0017944
bta-miR-2284f	novel_circ_0023023
bta-miR-2284f	novel_circ_0009302
bta-miR-2284r	novel_circ_0020570
bta-miR-2284r	novel_circ_0017514
bta-miR-2284r	novel_circ_0026682
bta-miR-2284r	novel_circ_0032244
bta-miR-2284x	novel_circ_0040269
bta-miR-2284x	novel_circ_0012515
bta-miR-2284x	novel_circ_0026269
bta-miR-2284x	novel_circ_0032091
bta-miR-2284x	novel_circ_0036749
bta-miR-2284x	novel_circ_0034224
bta-miR-2284x	novel_circ_0004886
bta-miR-2284x	novel_circ_0008501
bta-miR-2285l	novel_circ_0032966
bta-miR-2331-5p	novel_circ_0008476
bta-miR-2483-5p	novel_circ_0037762
bta-miR-2483-5p	novel_circ_0003810
bta-miR-2483-5p	novel_circ_0009927
bta-miR-26a	novel_circ_0012515
bta-miR-26a	novel_circ_0015839
bta-miR-26a	novel_circ_0026269
bta-miR-26a	novel_circ_0036440
bta-miR-26a	novel_circ_0036441
bta-miR-26a	novel_circ_0008291
bta-miR-26a	novel_circ_0007509
bta-miR-26b	novel_circ_0012515
bta-miR-26b	novel_circ_0036440
bta-miR-26b	novel_circ_0036441
bta-miR-26b	novel_circ_0007509
bta-miR-2898	novel_circ_0020515
bta-miR-2898	novel_circ_0013986
bta-miR-2898	novel_circ_0028977
bta-miR-2898	novel_circ_0023345
bta-miR-2898	novel_circ_0031818
bta-miR-2898	novel_circ_0032655
bta-miR-2898	novel_circ_0036827
bta-miR-2898	novel_circ_0038579
bta-miR-2898	novel_circ_0039781
bta-miR-29a	novel_circ_0011855
bta-miR-29a	novel_circ_0022349
bta-miR-29a	novel_circ_0030427
bta-miR-29a	novel_circ_0039352
bta-miR-29a	novel_circ_0003094
bta-miR-29a	novel_circ_0005995
bta-miR-29a	novel_circ_0008546
bta-miR-29b	novel_circ_0011855
bta-miR-29b	novel_circ_0014401
bta-miR-29b	novel_circ_0015526
bta-miR-29b	novel_circ_0033045
bta-miR-29b	novel_circ_0003094
bta-miR-29b	novel_circ_0003851
bta-miR-29b	novel_circ_0007224
bta-miR-29b	novel_circ_0005995
bta-miR-29b	novel_circ_0008546
bta-miR-29b	novel_circ_0011620
bta-miR-29c	novel_circ_0011855
bta-miR-29c	novel_circ_0014401
bta-miR-29c	novel_circ_0015526
bta-miR-29c	novel_circ_0033045
bta-miR-29c	novel_circ_0003094
bta-miR-29c	novel_circ_0003851
bta-miR-29c	novel_circ_0007224
bta-miR-29c	novel_circ_0005995
bta-miR-29c	novel_circ_0008546
bta-miR-29c	novel_circ_0011620
bta-miR-29d-3p	novel_circ_0011855
bta-miR-29d-3p	novel_circ_0014401
bta-miR-29d-3p	novel_circ_0015526
bta-miR-29d-3p	novel_circ_0033045
bta-miR-29d-3p	novel_circ_0003094
bta-miR-29d-3p	novel_circ_0003851
bta-miR-29d-3p	novel_circ_0007224
bta-miR-29d-3p	novel_circ_0005995
bta-miR-29d-3p	novel_circ_0008546
bta-miR-29d-3p	novel_circ_0011620
bta-miR-29e	novel_circ_0039862
bta-miR-29e	novel_circ_0011855
bta-miR-29e	novel_circ_0022349
bta-miR-29e	novel_circ_0022354
bta-miR-29e	novel_circ_0032091
bta-miR-29e	novel_circ_0038624
bta-miR-29e	novel_circ_0037762
bta-miR-29e	novel_circ_0002318
bta-miR-29e	novel_circ_0008476
bta-miR-30b-5p	novel_circ_0027166
bta-miR-30b-5p	novel_circ_0030404
bta-miR-30b-5p	novel_circ_0033102
bta-miR-30b-5p	novel_circ_0005387
bta-miR-30b-5p	novel_circ_0005389
bta-miR-30b-5p	novel_circ_0005391
bta-miR-3120	novel_circ_0021406
bta-miR-3120	novel_circ_0021407
bta-miR-3120	novel_circ_0012322
bta-miR-3120	novel_circ_0013930
bta-miR-3120	novel_circ_0015839
bta-miR-3120	novel_circ_0026773
bta-miR-3120	novel_circ_0028936
bta-miR-3120	novel_circ_0025228
bta-miR-3120	novel_circ_0032772
bta-miR-3120	novel_circ_0034318
bta-miR-3120	novel_circ_0000458
bta-miR-3120	novel_circ_0003810
bta-miR-3120	novel_circ_0008302
bta-miR-3120	novel_circ_0008476
bta-miR-3120	novel_circ_0009302
bta-miR-3120	novel_circ_0011011
bta-miR-328	novel_circ_0012515
bta-miR-328	novel_circ_0023345
bta-miR-328	novel_circ_0037487
bta-miR-328	novel_circ_0001425
bta-miR-328	novel_circ_0003810
bta-miR-3432a	novel_circ_0039862
bta-miR-3432a	novel_circ_0041320
bta-miR-3432a	novel_circ_0022557
bta-miR-369-3p	novel_circ_0032091
bta-miR-383	novel_circ_0039862
bta-miR-383	novel_circ_0000747
bta-miR-3956	novel_circ_0016759
bta-miR-3956	novel_circ_0034246
bta-miR-3956	novel_circ_0005458
bta-miR-409a	novel_circ_0018361
bta-miR-409a	novel_circ_0026773
bta-miR-409a	novel_circ_0028493
bta-miR-409a	novel_circ_0024392
bta-miR-409a	novel_circ_0004103
bta-miR-409b	novel_circ_0000450
bta-miR-409b	novel_circ_0008041
bta-miR-410	novel_circ_0010361
bta-miR-421	novel_circ_0026682
bta-miR-421	novel_circ_0032091
bta-miR-421	novel_circ_0001047
bta-miR-424-5p	novel_circ_0039862
bta-miR-424-5p	novel_circ_0039860
bta-miR-424-5p	novel_circ_0020570
bta-miR-424-5p	novel_circ_0018410
bta-miR-424-5p	novel_circ_0014142
bta-miR-424-5p	novel_circ_0015369
bta-miR-424-5p	novel_circ_0023837
bta-miR-424-5p	novel_circ_0032772
bta-miR-424-5p	novel_circ_0036659
bta-miR-424-5p	novel_circ_0039296
bta-miR-424-5p	novel_circ_0000136
bta-miR-424-5p	novel_circ_0001047
bta-miR-424-5p	novel_circ_0003094
bta-miR-424-5p	novel_circ_0006200
bta-miR-424-5p	novel_circ_0005458
bta-miR-424-5p	novel_circ_0010516
bta-miR-433	novel_circ_0017075
bta-miR-433	novel_circ_0012400
bta-miR-433	novel_circ_0026641
bta-miR-433	novel_circ_0034318
bta-miR-433	novel_circ_0000276
bta-miR-433	novel_circ_0009302
bta-miR-450a	novel_circ_0037464
bta-miR-450a	novel_circ_0037464
bta-miR-454	novel_circ_0017514
bta-miR-454	novel_circ_0013695
bta-miR-454	novel_circ_0027336
bta-miR-454	novel_circ_0033028
bta-miR-455-5p	novel_circ_0014885
bta-miR-455-5p	novel_circ_0015369
bta-miR-455-5p	novel_circ_0028936
bta-miR-494	novel_circ_0015369
bta-miR-494	novel_circ_0028493
bta-miR-494	novel_circ_0001047
bta-miR-494	novel_circ_0010886
bta-miR-496	novel_circ_0009302
bta-miR-499	novel_circ_0029717
bta-miR-499	novel_circ_0003602
bta-miR-502a	novel_circ_0014885
bta-miR-502a	novel_circ_0031589
bta-miR-502a	novel_circ_0008302
bta-miR-502a	novel_circ_0010367
bta-miR-503-5p	novel_circ_0020570
bta-miR-503-5p	novel_circ_0015839
bta-miR-503-5p	novel_circ_0022354
bta-miR-503-5p	novel_circ_0033102
bta-miR-532	novel_circ_0039862
bta-miR-532	novel_circ_0026269
bta-miR-532	novel_circ_0030211
bta-miR-532	novel_circ_0034191
bta-miR-532	novel_circ_0000886
bta-miR-532	novel_circ_0008291
bta-miR-6529a	novel_circ_0027540
bta-miR-6529a	novel_circ_0036827
bta-miR-6529b	novel_circ_0012676
bta-miR-758	novel_circ_0027412
bta-miR-758	novel_circ_0039178
bta-miR-92b	novel_circ_0027336
bta-miR-92b	novel_circ_0023023
bta-miR-92b	novel_circ_0031761
bta-miR-93	novel_circ_0012515
bta-miR-93	novel_circ_0027336
bta-miR-93	novel_circ_0024392
bta-miR-93	novel_circ_0032347
bta-miR-93	novel_circ_0038579
bta-miR-93	novel_circ_0008814
bta-miR-93	novel_circ_0008117
bta-miR-93	novel_circ_0008117
bta-miR-93	novel_circ_0010886
novel_101	novel_circ_0026641
novel_101	novel_circ_0028493
novel_101	novel_circ_0036659
novel_101	novel_circ_0034224
novel_158	novel_circ_0040351
novel_158	novel_circ_0036577
novel_158	novel_circ_0036749
novel_158	novel_circ_0003094
novel_158	novel_circ_0005796
novel_158	novel_circ_0011620
novel_181	novel_circ_0000458
novel_185	novel_circ_0026764
novel_185	novel_circ_0026773
novel_185	novel_circ_0022349
novel_185	novel_circ_0000458
novel_185	novel_circ_0005628
novel_195	novel_circ_0017949
novel_195	novel_circ_0012515
novel_195	novel_circ_0026639
novel_195	novel_circ_0026705
novel_195	novel_circ_0030404
novel_195	novel_circ_0032987
novel_195	novel_circ_0034095
novel_195	novel_circ_0005385
novel_195	novel_circ_0005391
novel_195	novel_circ_0005393
novel_195	novel_circ_0005796
novel_401	novel_circ_0030404
oar-miR-103	novel_circ_0040508
oar-miR-103	novel_circ_0026705
oar-miR-103	novel_circ_0031761
oar-miR-103	novel_circ_0037762
oar-miR-103	novel_circ_0000136
oar-miR-10b	novel_circ_0008476
oar-miR-10b	novel_circ_0008814
oar-miR-10b	novel_circ_0007964
oar-miR-10b	novel_circ_0010361
oar-miR-125b	novel_circ_0040508
oar-miR-125b	novel_circ_0040512
oar-miR-125b	novel_circ_0019713
oar-miR-125b	novel_circ_0017655
oar-miR-125b	novel_circ_0011939
oar-miR-125b	novel_circ_0024592
oar-miR-125b	novel_circ_0031403
oar-miR-125b	novel_circ_0037487
oar-miR-125b	novel_circ_0000458
oar-miR-125b	novel_circ_0011620
oar-miR-125b	novel_circ_0009713
oar-miR-154b-5p	novel_circ_0012515
oar-miR-154b-5p	novel_circ_0008476
oar-miR-154b-5p	novel_circ_0010507
oar-miR-17-5p	novel_circ_0027336
oar-miR-17-5p	novel_circ_0024392
oar-miR-17-5p	novel_circ_0032347
oar-miR-17-5p	novel_circ_0038579
oar-miR-17-5p	novel_circ_0008814
oar-miR-17-5p	novel_circ_0008117
oar-miR-17-5p	novel_circ_0008117
oar-miR-17-5p	novel_circ_0010886
oar-miR-26b	novel_circ_0012515
oar-miR-26b	novel_circ_0036440
oar-miR-26b	novel_circ_0036441
oar-miR-26b	novel_circ_0007509
oar-miR-29a	novel_circ_0011855
oar-miR-29a	novel_circ_0014401
oar-miR-29a	novel_circ_0015526
oar-miR-29a	novel_circ_0033045
oar-miR-29a	novel_circ_0003094
oar-miR-29a	novel_circ_0003851
oar-miR-29a	novel_circ_0007224
oar-miR-29a	novel_circ_0005995
oar-miR-29a	novel_circ_0008546
oar-miR-29a	novel_circ_0011620
oar-miR-29b	novel_circ_0011855
oar-miR-29b	novel_circ_0014401
oar-miR-29b	novel_circ_0015526
oar-miR-29b	novel_circ_0033045
oar-miR-29b	novel_circ_0003094
oar-miR-29b	novel_circ_0003851
oar-miR-29b	novel_circ_0007224
oar-miR-29b	novel_circ_0005995
oar-miR-29b	novel_circ_0008546
oar-miR-29b	novel_circ_0011620
oar-miR-30b	novel_circ_0027166
oar-miR-30b	novel_circ_0033102
oar-miR-30b	novel_circ_0005387
oar-miR-30b	novel_circ_0005389
oar-miR-30b	novel_circ_0005391
oar-miR-3956-5p	novel_circ_0017947
oar-miR-3956-5p	novel_circ_0013930
oar-miR-3956-5p	novel_circ_0028493
oar-miR-3956-5p	novel_circ_0036749
oar-miR-3956-5p	novel_circ_0034246
oar-miR-3958-3p	novel_circ_0016629
oar-miR-3958-3p	novel_circ_0016058
oar-miR-3958-3p	novel_circ_0036827
oar-miR-3958-3p	novel_circ_0005945
oar-miR-3958-3p	novel_circ_0005995
oar-miR-409-3p	novel_circ_0018428
oar-miR-409-3p	novel_circ_0012322
oar-miR-411a-3p	novel_circ_0014142
oar-miR-411a-3p	novel_circ_0027336
oar-miR-411a-3p	novel_circ_0039781
oar-miR-432	novel_circ_0040269
oar-miR-432	novel_circ_0040341
oar-miR-432	novel_circ_0011846
oar-miR-432	novel_circ_0015839
oar-miR-432	novel_circ_0016104
oar-miR-432	novel_circ_0036659
oar-miR-432	novel_circ_0034318
oar-miR-432	novel_circ_0039781
oar-miR-432	novel_circ_0037762
oar-miR-432	novel_circ_0007965
oar-miR-432	novel_circ_0007966
oar-miR-432	novel_circ_0011011
oar-miR-496-3p	novel_circ_0009302
oar-miR-539-3p	novel_circ_0032672
oar-miR-758-3p	novel_circ_0027412
