# Supplementary material for: Comprehensive Analysis of Differentially Expressed CircRNAs in the Ovaries of Low- and High-Fertility Sheep
Source: Animals (Basel). 2023 Jan 9;13(2):236. doi: 10.3390/ani13020236 (PMC9854751; doi:10.3390/ani13020236)
Supplement: Supplementary file 1 [file animals-13-00236-s001.zip › Supplementary table S5.xlsx]

## Sheet: miRNA_Qira_EvsHetian_E.DE_add_r
miRNA_ID	group1	group2	log2.Fold_change.	p.value	related mRNA
bta-miR-29b	1685.98	756.113	1.0908	2.7715e-08	ENSOARG00000013190
oar-miR-29b	1685.98	756.113	1.0908	2.7715e-08	ENSOARG00000000771,ENSOARG00000008469,ENSOARG00000009820,ENSOARG00000015455,ENSOARG00000021005
bta-miR-3120	965.233	515.557	0.87081	4.1749e-08
bta-miR-199b	12096.1	29292	-1.1759	2.0249e-07
bta-miR-29c	926.867	481.08	0.89127	7.6707e-06
bta-miR-383	26.9995	135.126	-1.6703	8.4426e-06
novel_158	34.9988	94.2218	-1.241	1.0026e-05	ENSOARG00000003527
bta-miR-135a	846.97	389.254	1.0132	4.1494e-05
bta-miR-92b	85.6506	41.5505	0.95363	7.9315e-05	ENSOARG00000009341
bta-miR-503-5p	830.475	2029.27	-1.1085	0.00014694	ENSOARG00000002428,ENSOARG00000004007
bta-miR-454	77.3201	160.132	-0.95029	0.00016476	ENSOARG00000014266
bta-miR-29d-3p	43.9566	17.4942	1.1218	0.00021428	ENSOARG00000013190
novel_101	102.383	483.772	-1.4725	0.00021488	ENSOARG00000002086,ENSOARG00000005863
oar-miR-29a	38593	24335.1	0.63384	0.00038858	ENSOARG00000008102,ENSOARG00000008469,ENSOARG00000009820,ENSOARG00000013190,ENSOARG00000014019,ENSOARG00000021005
bta-miR-29a	38593	24335.4	0.63383	0.00038868	ENSOARG00000013190
oar-miR-154b-5p	142.508	243.408	-0.71668	0.0014125	ENSOARG00000004737
novel_185	48.1168	18.9127	1.0864	0.0014458
bta-miR-409a	361.91	645.117	-0.75946	0.0016172
bta-miR-26a	845258	523183	0.64593	0.0020936	ENSOARG00000019298
bta-miR-129-3p	75.5063	38.0034	0.86337	0.0024532	ENSOARG00000003130,ENSOARG00000011649,ENSOARG00000018383
bta-miR-328	2216.12	1366.6	0.64836	0.002658	ENSOARG00000004155,ENSOARG00000009676,ENSOARG00000009974,ENSOARG00000019257
bta-miR-532	40814.8	24300.6	0.68786	0.0026736
oar-miR-539-3p	63.883	142.416	-0.9565	0.0028337
bta-miR-2285l	35.6692	88.3251	-1.025	0.0033429
bta-miR-502a	112.334	67.6996	0.67497	0.0036778	ENSOARG00000011813
bta-miR-146b	750.056	442.045	0.69506	0.0037131	ENSOARG00000001426
bta-miR-206	45.9018	133.133	-1.0988	0.0038052
bta-miR-2284f	97.4673	56.0715	0.72332	0.0038156
bta-miR-455-5p	20172.3	12727.4	0.61652	0.0046542
bta-miR-129	192.022	76.9158	1.0046	0.0051534
novel_195	7.4535	21.0525	-1.066	0.0052102	ENSOARG00000004155,ENSOARG00000008095,ENSOARG00000010073,ENSOARG00000016618,ENSOARG00000018645
oar-miR-3958-3p	859.325	1675.81	-0.82221	0.0057979
bta-miR-2331-5p	1.46069	8.42273	-1.1522	0.0061711	ENSOARG00000001254,ENSOARG00000004155,ENSOARG00000004768,ENSOARG00000006085,ENSOARG00000006234,ENSOARG00000012178,ENSOARG00000015240,ENSOARG00000016120,ENSOARG00000017909,ENSOARG00000018789,ENSOARG00000020839
bta-miR-369-3p	407.883	638.139	-0.59902	0.006743
bta-miR-26b	52792.1	32160.7	0.64789	0.0083166
oar-miR-26b	52792.1	32160.7	0.64789	0.0083166
bta-miR-410	89.1525	176.856	-0.82506	0.0084951
bta-miR-190b	29.315	76.0165	-0.97829	0.010236
bta-miR-151-5p	1836.07	1260.99	0.51047	0.010355
bta-miR-103	7307.38	9678.5	-0.39157	0.010733	ENSOARG00000020645
oar-miR-103	7296.4	9662.2	-0.3913	0.010847
bta-miR-107	1107.9	1652.87	-0.53867	0.010937
bta-miR-3432a	852.831	578.101	0.52572	0.012022
bta-miR-6529a	72.4121	113.634	-0.59706	0.013058
bta-miR-15b	430.547	577.311	-0.4054	0.01372	ENSOARG00000002920
bta-miR-6529b	72.4121	113.088	-0.59102	0.013756
bta-miR-10b	466462	313204	0.53263	0.015068
oar-miR-10b	466462	313203	0.53263	0.015068
bta-miR-2284r	13.9251	5.12594	0.95773	0.015156	ENSOARG00000002153,ENSOARG00000003399,ENSOARG00000014039
bta-miR-424-5p	3729.5	5169.14	-0.44691	0.01544
bta-miR-409b	795.455	1228.96	-0.57342	0.015554
bta-miR-30b-5p	10619.8	7191.7	0.52253	0.015709
oar-miR-30b	10619.8	7191.7	0.52253	0.015709
bta-miR-93	2258.43	3016.2	-0.40055	0.016682	ENSOARG00000004655,ENSOARG00000005053
bta-miR-141	12.4124	3.82839	0.98386	0.017105	ENSOARG00000010204
bta-miR-17-5p	2096.5	3096.19	-0.52129	0.017787
oar-miR-17-5p	2096.5	3096.19	-0.52129	0.017787	ENSOARG00000004655,ENSOARG00000005078,ENSOARG00000012556,ENSOARG00000015347,ENSOARG00000015495,ENSOARG00000016310,ENSOARG00000019058
novel_181	21.2904	9.42399	0.87601	0.01853	ENSOARG00000007420
oar-miR-409-3p	871.718	1344.87	-0.56836	0.019391	ENSOARG00000002222
novel_401	6.33315	1.29755	0.97136	0.020187	ENSOARG00000002920,ENSOARG00000015854
bta-miR-758	85.3626	140.815	-0.63844	0.020651
oar-miR-758-3p	85.3626	140.815	-0.63844	0.020651
bta-miR-2284x	6298.73	4371.6	0.49116	0.020747
bta-miR-450a	2746.6	3677.1	-0.40156	0.023736
bta-miR-494	1181.35	2131.9	-0.70955	0.023782
oar-miR-432	236.616	359.34	-0.5472	0.024293	ENSOARG00000005862
bta-miR-499	372.268	241.21	0.56265	0.025957
bta-miR-2483-5p	207.125	103.195	0.77323	0.030554
bta-miR-29e	3.49202	0.258327	0.82515	0.030952
bta-miR-2898	258.18	342.738	-0.39128	0.031514	ENSOARG00000000502,ENSOARG00000000665,ENSOARG00000003527,ENSOARG00000011113,ENSOARG00000019417,ENSOARG00000020100
bta-miR-125a	51069.4	36325.4	0.45736	0.032535	ENSOARG00000009676,ENSOARG00000009974,ENSOARG00000010073,ENSOARG00000020832
bta-miR-421	57.931	95.6039	-0.62675	0.0328
bta-miR-20a	5104.78	7105.08	-0.44562	0.032982
bta-miR-3956	6.01482	14.4589	-0.84062	0.035028	ENSOARG00000004970
oar-miR-3956-5p	6.01482	14.4589	-0.84062	0.035028	ENSOARG00000017165,ENSOARG00000019298
bta-miR-433	66.5476	121.918	-0.70414	0.03579
bta-miR-496	0.354557	4.1804	-0.77829	0.040736
oar-miR-496-3p	0.354557	4.1804	-0.77829	0.040736
bta-miR-2284ab	8.54385	17.6702	-0.75066	0.046991
bta-miR-151-3p	19001.9	14408.7	0.37762	0.047424	ENSOARG00000003300,ENSOARG00000004750,ENSOARG00000013313,ENSOARG00000015246
oar-miR-411a-3p	347.372	478.583	-0.4301	0.048361
bta-miR-1298	3.25704	14.6406	-0.81008	0.048638

## Sheet: mRNA_Qira_E_vs_Hetian_E.isoform
transcript_id	gene_id	gene_name	group1	group2	log2(foldchange)	pvalue
ENSOART00000017171	ENSOARG00000015771	NOL11	31.9837	5.52819	2.53246	4.75509e-05
ENSOART00000021092	ENSOARG00000019368	ACIN1	48.2042	42.3969	0.185199	7.1892e-05
ENSOART00000005283	ENSOARG00000004848	ITGBL1	12.4424	96.7536	-2.95905	0.000126417
ENSOART00000017172	ENSOARG00000015771	NOL11	3.60598	29.8408	-3.04883	0.000171027
ENSOART00000018897	ENSOARG00000017353	GPS1	19.3092	21.3183	-0.142798	0.000183814
ENSOART00000005552	ENSOARG00000005093	ARHGEF2	11.4481	12.9036	-0.172664	0.000220478
ENSOART00000013141	ENSOARG00000012084	-	197.191	251.796	-0.35266	0.000224765
ENSOART00000003116	ENSOARG00000002876	TCTN2	19.7469	13.9739	0.498887	0.000269963
ENSOART00000022070	ENSOARG00000020266	TTF2	10.7332	8.09481	0.407006	0.000314574
ENSOART00000014831	ENSOARG00000013620	ADGRL2	60.0798	56.6278	0.0853713	0.000491572
ENSOART00000002575	ENSOARG00000002378	SGCE	20.3879	0.362231	5.81466	0.000565636
ENSOART00000005078	ENSOARG00000004660	GRAMD1A	9.75899	8.98713	0.118871	0.00069078
ENSOART00000002133	ENSOARG00000001983	WDR5B	8.02252	8.35375	-0.0583684	0.000703481
ENSOART00000004792	ENSOARG00000004402	DYNLT1	16.8245	20.784	-0.304904	0.000760225
ENSOART00000010347	ENSOARG00000009500	SMNDC1	23.4466	20.0522	0.225615	0.000782414
ENSOART00000011165	ENSOARG00000010255	NUP155	23.4405	20.8721	0.167427	0.000888221
ENSOART00000006222	ENSOARG00000005717	RPS6	26.3052	30.4446	-0.210839	0.000991757
ENSOART00000014976	ENSOARG00000013753	EGFR	16.2933	15.0986	0.109864	0.00103173
ENSOART00000012766	ENSOARG00000011741	PEX11A	6.86221	6.89589	-0.00706412	0.00117142
ENSOART00000011288	ENSOARG00000010373	MICAL1	19.0898	25.9666	-0.44385	0.00131613
ENSOART00000018186	ENSOARG00000016700	PHLDA1	5.99657	3.27485	0.872712	0.00140499
ENSOART00000009481	ENSOARG00000008706	DAPK1	15.4898	10.5761	0.550507	0.00141539
ENSOART00000003718	ENSOARG00000003419	STK32A	1.96168	4.29486	-1.13052	0.00153453
ENSOART00000003554	ENSOARG00000003276	-	38.0546	41.1292	-0.112091	0.00164781
ENSOART00000003278	ENSOARG00000003025	RHOU	99.5833	131.785	-0.404213	0.00166033
ENSOART00000007809	ENSOARG00000007179	SHMT2	21.9612	19.2841	0.18755	0.00170672
ENSOART00000011943	ENSOARG00000010978	GAB1	3.12212	1.83668	0.765423	0.00188775
ENSOART00000000296	ENSOARG00000000269	RASGEF1B	48.9391	33.7688	0.535295	0.00190527
ENSOART00000002539	ENSOARG00000002344	MECR	9.94107	10.1434	-0.0290724	0.00196242
ENSOART00000018434	ENSOARG00000016926	FAM216A	5.6758	4.01983	0.497691	0.00204007
ENSOART00000013523	ENSOARG00000012434	FMO2	2.70657	0.754698	1.8425	0.00208391
ENSOART00000015602	ENSOARG00000014325	DSCR3	15.1194	18.382	-0.281888	0.00235086
ENSOART00000021170	ENSOARG00000019439	SFPQ	113.769	95.7488	0.248787	0.00240562
ENSOART00000003570	ENSOARG00000003293	PDGFD	86.5092	55.9033	0.629921	0.00243824
ENSOART00000014935	ENSOARG00000013726	AGK	8.48102	8.58688	-0.0178963	0.00254004
ENSOART00000017096	ENSOARG00000015708	CHODL	11.1722	20.1343	-0.849744	0.00261686
ENSOART00000006311	ENSOARG00000005789	MED13L	35.8059	27.5225	0.379582	0.00262356
ENSOART00000010971	ENSOARG00000010083	SLC25A37	18.6355	14.9769	0.315312	0.00270784
ENSOART00000005520	ENSOARG00000005067	-	23.3535	28.5916	-0.291951	0.00276307
ENSOART00000022465	ENSOARG00000020621	VCPKMT	12.2945	8.71276	0.496814	0.00283123
ENSOART00000019122	ENSOARG00000017569	NOP58	55.6655	49.5781	0.16708	0.00286324
ENSOART00000015168	ENSOARG00000013924	ANKRD11	9.25609	7.65422	0.274147	0.00317273
ENSOART00000007019	ENSOARG00000006454	DPP4	3.94017	3.4725	0.18228	0.00318274
ENSOART00000000807	ENSOARG00000000753	-	52.3521	59.854	-0.193201	0.00321674
ENSOART00000022574	ENSOARG00000020722	NAALADL2	6.70874	4.89981	0.453315	0.00322487
ENSOART00000010452	ENSOARG00000009599	ALDH1A3	11.4376	5.68421	1.00875	0.00327873
ENSOART00000004477	ENSOARG00000004116	KIZ	8.15979	7.45935	0.129481	0.0033035
ENSOART00000020487	ENSOARG00000018810	CEP120	45.1574	37.7238	0.259489	0.00336935
ENSOART00000021286	ENSOARG00000019544	PPP1CB	18.2365	10.2596	0.829853	0.00343157
ENSOART00000010511	ENSOARG00000009652	-	124.416	135.8	-0.12631	0.00345137
ENSOART00000011169	ENSOARG00000010266	SPOPL	30.7469	29.0446	0.0821677	0.00353267
ENSOART00000002492	ENSOARG00000002293	KMT2E	25.4022	20.0497	0.34137	0.00379015
ENSOART00000008975	ENSOARG00000008249	ASPN	227.595	430.005	-0.917886	0.00401756
ENSOART00000006423	ENSOARG00000005902	SPOP	22.1536	24.9524	-0.171637	0.00407671
ENSOART00000022280	ENSOARG00000020457	C1orf50	15.2531	16.8888	-0.146962	0.00423962
ENSOART00000008236	ENSOARG00000007565	RBM14	16.6824	12.9373	0.366791	0.00425405
ENSOART00000006737	ENSOARG00000006184	COL21A1	6.47402	9.42621	-0.542016	0.004279
ENSOART00000006819	ENSOARG00000006271	ALAD	14.2253	9.62544	0.563535	0.00431418
ENSOART00000008650	ENSOARG00000007937	RRN3	30.4236	25.5246	0.2533	0.00431994
ENSOART00000017839	ENSOARG00000016382	MAP9	15.4843	16.8595	-0.122762	0.00438306
ENSOART00000015725	ENSOARG00000014444	PRSS23	58.4067	66.5354	-0.187989	0.00448692
ENSOART00000011611	ENSOARG00000010666	AKAP13	12.3174	10.1693	0.276477	0.00452294
ENSOART00000014022	ENSOARG00000012880	COL6A2	234.52	279.189	-0.251528	0.00452527
ENSOART00000013278	ENSOARG00000012206	CA5A	147.608	0.325629	8.82433	0.00470975
ENSOART00000016795	ENSOARG00000015437	TSR1	24.7007	22.2386	0.151481	0.00477017
ENSOART00000015222	ENSOARG00000013978	BROX	47.1297	38.5597	0.289543	0.00485314
ENSOART00000003522	ENSOARG00000003238	GNPAT	16.112	16.3038	-0.0170719	0.00498667
ENSOART00000004313	ENSOARG00000003970	-	5.87439	4.71173	0.318182	0.00500144
ENSOART00000011646	ENSOARG00000010700	MSANTD2	11.855	10.1392	0.225552	0.00500363
ENSOART00000008222	ENSOARG00000007545	EML4	25.902	24.4396	0.0838455	0.00510563
ENSOART00000008411	ENSOARG00000007729	MED11	21.8115	21.067	0.0501104	0.00523901
ENSOART00000015898	ENSOARG00000014607	RWDD2B	15.509	15.579	-0.00649562	0.00533456
ENSOART00000021058	ENSOARG00000019336	BCL2L2-PABPN1	33.7278	31.429	0.101842	0.00548612
ENSOART00000004789	ENSOARG00000004399	UBB	953.882	1139.16	-0.256093	0.00553027
ENSOART00000019035	ENSOARG00000017488	-	3.31039	5.60052	-0.758561	0.00561743
ENSOART00000009381	ENSOARG00000008616	PNN	52.2874	39.7041	0.397175	0.00562922
ENSOART00000020653	ENSOARG00000018968	WDR36	16.8039	15.3414	0.131372	0.00571001
ENSOART00000020616	ENSOARG00000018930	-	44.3035	51.8032	-0.225621	0.00573565
ENSOART00000005762	ENSOARG00000005290	USMG5	6.00042	8.23651	-0.456969	0.00574232
ENSOART00000006779	ENSOARG00000006234	ISG20L2	11.6985	11.9562	-0.0314307	0.00575589
ENSOART00000010276	ENSOARG00000009438	APOE	426.582	634.286	-0.572308	0.00604276
ENSOART00000005125	ENSOARG00000004701	WDR11	18.6726	16.863	0.147067	0.00652094
ENSOART00000013140	ENSOARG00000012083	CORO1B	23.6451	24.8439	-0.071346	0.00652844
ENSOART00000009975	ENSOARG00000009166	SF1	23.0031	18.2039	0.337575	0.00658421
ENSOART00000008592	ENSOARG00000007892	-	1.70262	9.48843	-2.47841	0.00670139
ENSOART00000009864	ENSOARG00000009060	-	12.0739	8.75663	0.463442	0.00670778
ENSOART00000017175	ENSOARG00000015776	C21orf91	25.7717	26.1153	-0.0191086	0.00672815
ENSOART00000006221	ENSOARG00000005714	ATF7IP2	5.38658	8.72026	-0.695001	0.00688205
ENSOART00000015330	ENSOARG00000014069	-	7.35305	21.2207	-1.52906	0.00705859
ENSOART00000014358	ENSOARG00000013207	-	54.8466	52.6197	0.0597976	0.00715968
ENSOART00000022740	ENSOARG00000020872	TCF12	25.7126	21.7339	0.242528	0.00728401
ENSOART00000000852	ENSOARG00000000793	DPH7	21.2482	24.6392	-0.213614	0.00733449
ENSOART00000001698	ENSOARG00000001576	FGFR1	37.0957	27.2576	0.444592	0.00733619
ENSOART00000021892	ENSOARG00000020109	SRP14	113.234	119.381	-0.0762762	0.00733973
ENSOART00000002199	ENSOARG00000002041	-	16.6079	16.5432	0.00562866	0.00741019
ENSOART00000015201	ENSOARG00000013957	PPEF1	4.22196	6.16208	-0.545503	0.00751225
ENSOART00000017106	ENSOARG00000015716	COMMD8	24.8279	26.5823	-0.0985033	0.00754603
ENSOART00000000981	ENSOARG00000000916	TNFAIP8L3	31.7636	21.1024	0.589967	0.00765669
ENSOART00000002500	ENSOARG00000002309	-	35.6706	42.2582	-0.244494	0.00773678
ENSOART00000016622	ENSOARG00000015274	DOK5	3.03352	7.93883	-1.38793	0.00777752
ENSOART00000010530	ENSOARG00000009670	CPXM2	2.70482	8.34784	-1.62587	0.0077878
ENSOART00000018774	ENSOARG00000017247	METTL14	42.2834	34.0248	0.313502	0.00791342
ENSOART00000010326	ENSOARG00000009483	-	0.29351	77.2886	-8.0407	0.00804239
ENSOART00000002916	ENSOARG00000002693	CNNM2	9.38286	11.6745	-0.315259	0.00804275
ENSOART00000002759	ENSOARG00000002548	UST	10.2155	8.5566	0.255649	0.00812526
ENSOART00000000668	ENSOARG00000000619	RAB8A	18.2209	17.2872	0.0758889	0.00814618
ENSOART00000005257	ENSOARG00000004822	FBXO21	18.4688	16.8888	0.129021	0.00816205
ENSOART00000021113	ENSOARG00000019389	CCDC121	7.39494	3.85991	0.937972	0.00817365
ENSOART00000004275	ENSOARG00000003933	CSGALNACT1	27.7986	17.8802	0.636652	0.00820404
ENSOART00000008989	ENSOARG00000008266	-	9.53392	7.95213	0.261729	0.00821687
ENSOART00000011918	ENSOARG00000010957	AEN	5.85387	4.66594	0.327223	0.00823796
ENSOART00000006349	ENSOARG00000005832	PJA1	22.9556	21.4352	0.098868	0.00830725
ENSOART00000013916	ENSOARG00000012806	CDH12	3.62478	20.8874	-2.52667	0.00832014
ENSOART00000010174	ENSOARG00000009347	DSE	38.0324	29.6267	0.360328	0.0084994
ENSOART00000011249	ENSOARG00000010339	CCDC94	10.7352	10.6943	0.00550369	0.00852346
ENSOART00000007631	ENSOARG00000007013	ZSWIM6	8.64112	7.82698	0.142763	0.00856167
ENSOART00000004020	ENSOARG00000003675	HEATR1	21.3293	17.8797	0.254512	0.00861338
ENSOART00000022036	ENSOARG00000020238	-	4.11029	4.39135	-0.0954264	0.00861383
ENSOART00000004333	ENSOARG00000003985	ROGDI	7.479	8.08577	-0.11254	0.00879236
ENSOART00000007490	ENSOARG00000006888	TMEM59	210.867	239.276	-0.182341	0.00884797
ENSOART00000005590	ENSOARG00000005131	PSMB1	19.5396	23.2596	-0.251425	0.00896181
ENSOART00000006884	ENSOARG00000006324	WDR59	8.94012	6.37536	0.487787	0.0089669
ENSOART00000004094	ENSOARG00000003763	AGO2	16.9063	14.6759	0.204113	0.00902313
ENSOART00000007357	ENSOARG00000006769	-	2.15069	2.24742	-0.0634692	0.0090731
ENSOART00000004844	ENSOARG00000004451	RNF11	70.2938	69.5227	0.0159148	0.00908313
ENSOART00000021027	ENSOARG00000019307	-	7.27365	6.71857	0.114525	0.00910445
ENSOART00000016731	ENSOARG00000015378	-	142.197	155.591	-0.129875	0.00915034
ENSOART00000013043	ENSOARG00000011994	-	11.1568	8.35425	0.417334	0.00916967
ENSOART00000006678	ENSOARG00000006140	SLC26A2	271.473	135.036	1.00746	0.00919784
ENSOART00000001047	ENSOARG00000000978	ACAA1	29.3399	38.2527	-0.382699	0.00920132
ENSOART00000018791	ENSOARG00000017264	-	6.25477	4.63144	0.433495	0.00942839
ENSOART00000012101	ENSOARG00000011129	SERF2	543.065	621.77	-0.195256	0.009482
ENSOART00000010848	ENSOARG00000009964	TRPC4	2.12103	2.14227	-0.014374	0.00951706
ENSOART00000006625	ENSOARG00000006093	TALDO1	94.5184	113.512	-0.264182	0.0096452
ENSOART00000017031	ENSOARG00000015645	SRRT	32.3434	28.2445	0.195501	0.00968619
ENSOART00000006938	ENSOARG00000006375	FKBP15	11.0268	12.5919	-0.19148	0.00978963
ENSOART00000008626	ENSOARG00000007919	-	3.13448	13.1134	-2.06474	0.00981305
ENSOART00000011736	ENSOARG00000010789	BTBD3	10.5365	8.77946	0.263191	0.00983435
ENSOART00000018234	ENSOARG00000016737	TNS2	13.236	8.78457	0.591428	0.00983895
ENSOART00000017296	ENSOARG00000015888	-	104.116	126.037	-0.275652	0.00985131
ENSOART00000003046	ENSOARG00000002809	GMEB1	9.93569	7.9693	0.318168	0.00993629
ENSOART00000016950	ENSOARG00000015579	LRP12	27.0725	19.6167	0.464744	0.00998284
ENSOART00000016160	ENSOARG00000014849	NEDD9	25.1604	18.1495	0.471221	0.010043
ENSOART00000018211	ENSOARG00000016721	-	5.50718	11.165	-1.0196	0.0100663
ENSOART00000012961	ENSOARG00000011914	ZCCHC14	17.9775	17.0701	0.0747189	0.0101514
ENSOART00000003549	ENSOARG00000003268	NAALAD2	8.74066	14.3121	-0.711416	0.0102435
ENSOART00000022231	ENSOARG00000020415	FAM124B	1.5217	3.02744	-0.992419	0.0102631
ENSOART00000002687	ENSOARG00000002470	GNL3	14.5421	12.8039	0.183649	0.0103584
ENSOART00000021991	ENSOARG00000020198	KCNMB4	8.37497	6.08051	0.461893	0.0104033
ENSOART00000007311	ENSOARG00000006724	-	112.681	122.762	-0.123617	0.0104456
ENSOART00000008202	ENSOARG00000007534	-	9.08415	14.4908	-0.673709	0.0104566
ENSOART00000017723	ENSOARG00000016273	HIBCH	19.2936	20.7475	-0.104812	0.010513
ENSOART00000012373	ENSOARG00000011381	PKNOX2	5.35623	7.03513	-0.393358	0.0105188
ENSOART00000016886	ENSOARG00000015518	VPS35	75.9271	80.1907	-0.0788208	0.0106816
ENSOART00000008135	ENSOARG00000007472	CASP3	13.9555	23.0578	-0.724419	0.0107763
ENSOART00000022538	ENSOARG00000020686	PYGL	44.8269	60.1063	-0.423153	0.0109007
ENSOART00000009077	ENSOARG00000008345	ZNF605	18.1225	14.7364	0.298395	0.010903
ENSOART00000002517	ENSOARG00000002317	CEP295	29.4594	25.2719	0.221189	0.0109749
ENSOART00000018323	ENSOARG00000016818	POC5	9.93876	7.57332	0.39214	0.0110614
ENSOART00000008577	ENSOARG00000007880	-	101.041	113.275	-0.164879	0.0110732
ENSOART00000008148	ENSOARG00000007484	WDSUB1	32.1574	46.076	-0.518865	0.0111228
ENSOART00000020891	ENSOARG00000019184	SORT1	5.53413	5.24358	0.0778037	0.0111431
ENSOART00000003385	ENSOARG00000003123	DERL2	36.5508	41.0198	-0.16642	0.0112513
ENSOART00000000385	ENSOARG00000000362	NUP107	35.7886	31.8625	0.167639	0.0112548
ENSOART00000009327	ENSOARG00000008570	RBMS2	41.7974	33.215	0.331579	0.0113324
ENSOART00000004399	ENSOARG00000004046	-	30.2552	34.0714	-0.171375	0.0113392
ENSOART00000002440	ENSOARG00000002248	TBC1D9B	22.7485	23.7969	-0.0650025	0.0113647
ENSOART00000013988	ENSOARG00000012864	EMSY	7.55852	6.01015	0.330702	0.0113695
ENSOART00000021162	ENSOARG00000019432	-	20.9045	15.8201	0.402049	0.0113807
ENSOART00000014749	ENSOARG00000013550	PTPRK	24.8781	18.5431	0.423992	0.0114425
ENSOART00000017195	ENSOARG00000015791	EXOC3	27.1832	23.9292	0.183943	0.011493
ENSOART00000005512	ENSOARG00000005061	TXNL1	61.6821	70.0147	-0.182806	0.0115204
ENSOART00000010938	ENSOARG00000010053	ARL6IP5	84.3724	106.342	-0.333874	0.0115739
ENSOART00000022411	ENSOARG00000020571	TTBK2	14.0658	12.7918	0.136974	0.011597
ENSOART00000013411	ENSOARG00000012337	MOB1A	68.2411	79.3601	-0.217773	0.0116045
ENSOART00000011036	ENSOARG00000010144	KLF3	28.6196	22.7596	0.330524	0.0120132
ENSOART00000012800	ENSOARG00000011772	MRPL54	9.35389	14.2035	-0.602606	0.0121057
ENSOART00000023025	ENSOARG00000021131	MNAT1	28.5178	22.418	0.347206	0.0124388
ENSOART00000020094	ENSOARG00000018462	-	57.2242	84.8638	-0.568523	0.0124818
ENSOART00000006084	ENSOARG00000005586	PHYH	24.7383	30.8744	-0.319664	0.0125239
ENSOART00000004226	ENSOARG00000003891	PTRH2	21.4347	19.7275	0.119737	0.0125543
ENSOART00000001437	ENSOARG00000001333	MDM1	3.82365	1.61679	1.24182	0.0126072
ENSOART00000013935	ENSOARG00000012810	COL6A1	187.205	255.375	-0.447994	0.0126243
ENSOART00000016299	ENSOARG00000014975	GTF3C3	22.3444	20.2272	0.14362	0.0126274
ENSOART00000014175	ENSOARG00000013036	CSNK1G2	19.7511	21.4601	-0.119725	0.0127809
ENSOART00000020892	ENSOARG00000019184	SORT1	23.0799	21.9521	0.0722771	0.012931
ENSOART00000009732	ENSOARG00000008934	TSPAN13	16.9736	19.3242	-0.187121	0.0129506
ENSOART00000017177	ENSOARG00000015777	ACTR8	8.96854	10.2805	-0.196966	0.0129855
ENSOART00000019403	ENSOARG00000017833	CHRDL1	11.8602	6.70883	0.821998	0.0130863
ENSOART00000009043	ENSOARG00000008308	RYK	132.061	187.463	-0.505403	0.0132222
ENSOART00000012522	ENSOARG00000011514	NUP153	24.7897	21.098	0.232635	0.0132767
ENSOART00000002531	ENSOARG00000002335	PKD2	78.5357	70.3271	0.159268	0.0133022
ENSOART00000003874	ENSOARG00000003567	TERF2	17.8588	15.4698	0.207178	0.0134513
ENSOART00000012377	ENSOARG00000011380	ADGRF5	9.75697	14.1358	-0.534846	0.0134612
ENSOART00000019217	ENSOARG00000017660	RALA	41.4217	47.4044	-0.194635	0.0135931
ENSOART00000019089	ENSOARG00000017538	-	28.6959	36.8324	-0.360129	0.0136031
ENSOART00000018511	ENSOARG00000016999	DNTTIP2	36.7005	31.8726	0.203482	0.0136309
ENSOART00000012907	ENSOARG00000011870	PUS3	32.2163	28.4262	0.180571	0.0136474
ENSOART00000005130	ENSOARG00000004710	SLC22A3	4.52267	3.45411	0.38886	0.0136992
ENSOART00000016848	ENSOARG00000015485	DQA	5.72528	5.85848	-0.0331811	0.0137122
ENSOART00000020822	ENSOARG00000019122	-	10.0716	3.73774	1.43005	0.0137559
ENSOART00000012343	ENSOARG00000011353	NAGK	13.2146	15.5946	-0.238912	0.0137619
ENSOART00000013217	ENSOARG00000012153	CCDC160	2.70058	4.40159	-0.704755	0.0137724
ENSOART00000017179	ENSOARG00000015777	ACTR8	4.80818	5.29703	-0.139692	0.0138576
ENSOART00000009218	ENSOARG00000008469	KPNB1	85.0367	94.0732	-0.145697	0.0140025
ENSOART00000008481	ENSOARG00000007768	HUWE1	31.829	28.9281	0.137871	0.0140174
ENSOART00000021669	ENSOARG00000019902	PLEK	5.99477	18.9804	-1.66273	0.0141493
ENSOART00000000892	ENSOARG00000000809	STAT5A	11.9648	8.72231	0.456017	0.0141987
ENSOART00000009443	ENSOARG00000008674	PSMD13	81.1306	92.7855	-0.193653	0.0142253
ENSOART00000000204	ENSOARG00000000200	SSTR2	2.26603	0.783173	1.53276	0.014233
ENSOART00000018417	ENSOARG00000016905	CWC22	12.6903	10.5161	0.271131	0.0142852
ENSOART00000002186	ENSOARG00000002032	-	3.62711	1.02866	1.81805	0.0142973
ENSOART00000003208	ENSOARG00000002954	KAT6A	13.4871	10.297	0.389351	0.0144035
ENSOART00000011024	ENSOARG00000010132	-	202.446	154.866	0.386518	0.014481
ENSOART00000006645	ENSOARG00000006113	SGTB	7.2637	5.53136	0.393071	0.0144929
ENSOART00000019818	ENSOARG00000018215	UPRT	16.8354	20.9592	-0.316084	0.0145776
ENSOART00000014902	ENSOARG00000013694	EMCN	29.3277	32.7201	-0.157914	0.0147578
ENSOART00000002610	ENSOARG00000002400	CCDC88A	26.6241	28.2469	-0.0853577	0.0148247
ENSOART00000004634	ENSOARG00000004255	TMEM242	13.442	15.5379	-0.209044	0.0148304
ENSOART00000004428	ENSOARG00000004073	PSD3	45.3751	34.2138	0.407321	0.0148689
ENSOART00000020059	ENSOARG00000018427	APBB1	20.1807	19.733	0.032371	0.0148941
ENSOART00000006953	ENSOARG00000006394	LDHD	4.96075	2.68213	0.887179	0.0148967
ENSOART00000022708	ENSOARG00000020844	SLTM	50.6976	42.599	0.251097	0.0149205
ENSOART00000003600	ENSOARG00000003318	TRIM2	38.9533	33.4297	0.220617	0.0149355
ENSOART00000011752	ENSOARG00000010805	SNX3	107.75	121.044	-0.167847	0.0149579
ENSOART00000021082	ENSOARG00000019356	FGD4	17.0027	11.2279	0.598671	0.0150069
ENSOART00000022347	ENSOARG00000020516	MAT2A	45.22	39.9445	0.178964	0.0150547
ENSOART00000019590	ENSOARG00000017999	CHIC1	8.29466	5.89373	0.493002	0.0150637
ENSOART00000013968	ENSOARG00000012853	PIGK	27.5746	31.121	-0.174549	0.0151291
ENSOART00000018495	ENSOARG00000016985	-	28.142	34.1539	-0.279326	0.0151526
ENSOART00000013900	ENSOARG00000012767	CEP250	6.3896	4.50064	0.505594	0.0152028
ENSOART00000022604	ENSOARG00000020749	PPIB	467.43	602.745	-0.366798	0.0152841
ENSOART00000022596	ENSOARG00000020741	TNFSF10	12.0918	12.6512	-0.0652407	0.0152852
ENSOART00000012913	ENSOARG00000011874	PNISR	84.7585	64.8761	0.385672	0.0153181
ENSOART00000014842	ENSOARG00000013640	TRAPPC2L	21.2334	20.917	0.0216637	0.0153283
ENSOART00000008816	ENSOARG00000008102	CUEDC1	19.179	23.6829	-0.304316	0.0153416
ENSOART00000019170	ENSOARG00000017617	UFD1	24.6481	29.0913	-0.239114	0.01538
ENSOART00000014203	ENSOARG00000013065	IKBIP	19.0232	18.5163	0.0389703	0.0154889
ENSOART00000021365	ENSOARG00000019618	METTL3	22.76	20.9199	0.121625	0.0155622
ENSOART00000007231	ENSOARG00000006643	RASA2	10.0923	7.20049	0.48709	0.0155881
ENSOART00000009583	ENSOARG00000008800	-	57.9862	41.5798	0.479827	0.0156232
ENSOART00000004422	ENSOARG00000004070	CALHM2	16.2551	14.7779	0.137452	0.0156458
ENSOART00000012422	ENSOARG00000011422	SCUBE3	4.25427	1.93839	1.13405	0.0157869
ENSOART00000004723	ENSOARG00000004338	RHOBTB1	30.6499	23.0651	0.410172	0.0158279
ENSOART00000006976	ENSOARG00000006419	-	5.79532	13.9519	-1.2675	0.0158516
ENSOART00000001826	ENSOARG00000001696	YY1	24.9371	23.7187	0.0722666	0.0159805
ENSOART00000013063	ENSOARG00000012005	PATL1	13.3115	10.0068	0.411687	0.0160023
ENSOART00000012648	ENSOARG00000011634	SPR	41.7715	45.8712	-0.135071	0.0160812
ENSOART00000003104	ENSOARG00000002861	SLC36A4	11.695	12.6912	-0.117946	0.0161885
ENSOART00000021040	ENSOARG00000019320	ATG16L1	6.37357	4.70479	0.437973	0.0161977
ENSOART00000009237	ENSOARG00000008488	FGGY	10.0503	7.89893	0.347508	0.0161994
ENSOART00000011588	ENSOARG00000010653	ELMOD1	4.96643	1.18161	2.07146	0.0162252
ENSOART00000006921	ENSOARG00000006367	-	328.069	440.095	-0.423814	0.0162796
ENSOART00000001642	ENSOARG00000001528	MUTYH	5.72052	3.80535	0.588118	0.0163058
ENSOART00000012081	ENSOARG00000011110	RGS5	71.4797	89.7897	-0.329017	0.0163863
ENSOART00000009755	ENSOARG00000008955	TM2D1	22.8566	23.1229	-0.016707	0.016501
ENSOART00000013302	ENSOARG00000012232	BUD23	41.0783	51.1688	-0.316888	0.0165089
ENSOART00000005319	ENSOARG00000004885	RIT1	32.3472	37.001	-0.193922	0.0165181
ENSOART00000012615	ENSOARG00000011600	LYPD1	13.8021	7.04492	0.970229	0.0166168
ENSOART00000016921	ENSOARG00000015531	CEP290	6.15232	5.36924	0.196413	0.0166383
ENSOART00000007067	ENSOARG00000006497	TCTN3	28.0791	19.3607	0.536366	0.0167049
ENSOART00000003377	ENSOARG00000003112	AKAP12	100.108	52.9144	0.91983	0.0167188
ENSOART00000010671	ENSOARG00000009805	-	3.12937	1.508	1.05323	0.0167953
ENSOART00000015541	ENSOARG00000014267	LRWD1	7.1362	5.19078	0.459204	0.0168054
ENSOART00000010507	ENSOARG00000009650	ALG6	10.729	13.4517	-0.326273	0.0168126
ENSOART00000023102	ENSOARG00000021200	RGS6	7.77936	0.820539	3.24501	0.0168403
ENSOART00000015262	ENSOARG00000014018	-	20.223	12.684	0.672987	0.016879
ENSOART00000011170	ENSOARG00000010267	LDB2	8.86516	7.53735	0.234089	0.0168795
ENSOART00000004285	ENSOARG00000003943	BICRAL	7.4482	4.82658	0.62589	0.0170531
ENSOART00000000318	ENSOARG00000000301	FAM32A	121.983	124.676	-0.0315032	0.0171784
ENSOART00000009234	ENSOARG00000008480	ALOX15	6.50119	4.37263	0.572203	0.0172603
ENSOART00000021740	ENSOARG00000019968	-	7.22105	3.14325	1.19995	0.017309
ENSOART00000001909	ENSOARG00000001772	FOXP2	8.34	10.7997	-0.372875	0.0173461
ENSOART00000003235	ENSOARG00000002985	-	9.80719	8.71134	0.170944	0.0173476
ENSOART00000019666	ENSOARG00000018058	DENND4A	26.3776	21.12	0.320704	0.017522
ENSOART00000021680	ENSOARG00000019914	PNO1	18.1221	21.8969	-0.272977	0.0175583
ENSOART00000013757	ENSOARG00000012657	LYRM2	9.01881	14.056	-0.640173	0.0175822
ENSOART00000020870	ENSOARG00000019164	NEDD8	144.57	144.859	-0.00287992	0.0177355
ENSOART00000007751	ENSOARG00000007122	NDUFS3	47.3143	52.2706	-0.143726	0.0179212
ENSOART00000001241	ENSOARG00000001166	NRIP1	43.3785	44.7108	-0.0436438	0.0179382
ENSOART00000022745	ENSOARG00000020876	ZNF280D	44.323	34.0068	0.382234	0.0179705
ENSOART00000022130	ENSOARG00000020323	INO80	11.3771	9.73177	0.22536	0.0180912
ENSOART00000014681	ENSOARG00000013496	MGAT4A	12.266	7.35885	0.737114	0.018331
ENSOART00000018005	ENSOARG00000016534	TFPI	3.56955	6.19317	-0.794934	0.0183855
ENSOART00000020599	ENSOARG00000018918	SNX24	7.67121	10.826	-0.496969	0.0184601
ENSOART00000014730	ENSOARG00000013539	SGTA	19.9991	16.8935	0.243463	0.0184847
ENSOART00000010245	ENSOARG00000009409	SNX13	126.119	126.63	-0.0058389	0.0185622
ENSOART00000007574	ENSOARG00000006972	-	2.50016	3.31205	-0.405706	0.0185828
ENSOART00000013238	ENSOARG00000012172	ZNF330	7.19955	8.344	-0.212833	0.0186363
ENSOART00000013218	ENSOARG00000012154	SUB1	88.7152	97.2057	-0.131859	0.0188132
ENSOART00000010704	ENSOARG00000009835	MFSD4B	5.95532	6.45491	-0.116218	0.0188359
ENSOART00000021110	ENSOARG00000019384	STRIP1	12.8964	14.7333	-0.192114	0.0188417
ENSOART00000016144	ENSOARG00000014837	MGMT	6.99324	5.04454	0.471239	0.0188637
ENSOART00000001118	ENSOARG00000001033	FCHSD1	10.2062	7.5898	0.427316	0.0189154
ENSOART00000017449	ENSOARG00000016018	NVL	22.6143	18.8883	0.259738	0.0189499
ENSOART00000004866	ENSOARG00000004474	ZNF365	9.04023	8.9666	0.0117993	0.0189832
ENSOART00000003785	ENSOARG00000003485	CMC4	13.2009	18.6651	-0.4997	0.0190046
ENSOART00000021015	ENSOARG00000019298	CD200	85.6998	41.6786	1.03998	0.0190608
ENSOART00000005007	ENSOARG00000004603	-	3.6761	1.76023	1.06241	0.0191514
ENSOART00000017937	ENSOARG00000016468	RASSF2	9.0256	10.6837	-0.243318	0.0191728
ENSOART00000010622	ENSOARG00000009763	PCGF2	7.44343	5.07652	0.552128	0.0192076
ENSOART00000023023	ENSOARG00000021130	SIX4	5.10768	4.00262	0.351723	0.0193535
ENSOART00000020573	ENSOARG00000018887	ANKFY1	12.3399	10.2481	0.267978	0.0194652
ENSOART00000022970	ENSOARG00000021084	MAPK1IP1L	21.9744	17.9004	0.295833	0.0195085
ENSOART00000019363	ENSOARG00000017798	-	3.63378	1.38889	1.38753	0.0196212
ENSOART00000005294	ENSOARG00000004856	TMEM147	99.4134	120.818	-0.281317	0.0197748
ENSOART00000000493	ENSOARG00000000456	CTTN	32.8716	36.9609	-0.16916	0.019819
ENSOART00000004443	ENSOARG00000004087	URI1	38.3398	34.4077	0.156114	0.0199004
ENSOART00000018662	ENSOARG00000017146	-	3.96668	5.1252	-0.369679	0.0199354
ENSOART00000014099	ENSOARG00000012970	SLC25A3	238.652	274.739	-0.203153	0.020057
ENSOART00000009270	ENSOARG00000008522	-	5.0009	9.77399	-0.966758	0.0201489
ENSOART00000004512	ENSOARG00000004146	FBXW7	14.4548	10.6465	0.441168	0.0203294
ENSOART00000007913	ENSOARG00000007277	TRIM41	22.3892	19.085	0.230357	0.0203531
ENSOART00000005748	ENSOARG00000005263	PLEKHA7	10.7327	9.08765	0.240033	0.0204871
ENSOART00000021134	ENSOARG00000019406	LRP10	4.80452	8.37886	-0.802362	0.0205637
ENSOART00000012847	ENSOARG00000011809	PRADC1	6.74358	7.35493	-0.125196	0.0207566
ENSOART00000010813	ENSOARG00000009937	CWC25	20.0823	16.4486	0.28796	0.0207631
ENSOART00000004872	ENSOARG00000004478	CPTP	11.1609	12.4764	-0.160753	0.0212116
ENSOART00000000062	ENSOARG00000000058	-	13.1821	13.1215	0.00664535	0.0212869
ENSOART00000007470	ENSOARG00000006870	RBMS1	4.57327	3.95324	0.210194	0.0213705
ENSOART00000022842	ENSOARG00000020967	PSMD4	90.9349	93.2236	-0.0358616	0.0213836
ENSOART00000000975	ENSOARG00000000909	THOC6	7.79926	10.27	-0.397033	0.0214036
ENSOART00000012381	ENSOARG00000011388	ZNF638	85.6634	67.8402	0.336538	0.0214949
ENSOART00000014911	ENSOARG00000013704	TMEM258	51.4227	64.7658	-0.332826	0.0215009
ENSOART00000003615	ENSOARG00000003331	LUC7L3	85.9516	59.8775	0.52151	0.0215314
ENSOART00000018329	ENSOARG00000016831	NDUFB3	118.005	129.322	-0.132127	0.0216246
ENSOART00000014421	ENSOARG00000013259	FUBP1	41.9213	36.8049	0.187788	0.021655
ENSOART00000022285	ENSOARG00000020462	IL1RAP	8.16034	9.50142	-0.219515	0.0216563
ENSOART00000011622	ENSOARG00000010684	SNN	15.7797	25.2798	-0.679916	0.0219594
ENSOART00000018073	ENSOARG00000016592	PRDX4	128.05	169.566	-0.405139	0.0219665
ENSOART00000001384	ENSOARG00000001291	TMEM35A	8.06621	8.81625	-0.128274	0.0219957
ENSOART00000010433	ENSOARG00000009583	-	78.514	71.5735	0.133524	0.0220178
ENSOART00000020619	ENSOARG00000018936	-	2.9776	1.05736	1.49368	0.0221268
ENSOART00000000960	ENSOARG00000000894	NFYA	10.1247	7.73736	0.387967	0.0222587
ENSOART00000018706	ENSOARG00000017186	PAPD5	18.4216	13.241	0.476386	0.0223217
ENSOART00000011591	ENSOARG00000010657	-	35.044	28.1411	0.316487	0.0225318
ENSOART00000010392	ENSOARG00000009536	PLCB4	29.8559	30.5395	-0.0326589	0.0225399
ENSOART00000010913	ENSOARG00000010030	RAVER2	6.01345	10.5599	-0.812337	0.0225778
ENSOART00000005160	ENSOARG00000004733	RXFP1	42.7185	58.7141	-0.458845	0.0226151
ENSOART00000000437	ENSOARG00000000405	PPP1R16B	3.76299	5.27289	-0.486715	0.0226977
ENSOART00000001809	ENSOARG00000001680	SFRP2	22.3171	18.4531	0.274284	0.0227367
ENSOART00000005401	ENSOARG00000004955	PTPRA	44.3268	44.132	0.00635242	0.022779
ENSOART00000021369	ENSOARG00000019623	ERGIC2	24.8158	26.1116	-0.0734276	0.022797
ENSOART00000018282	ENSOARG00000016782	DNAJC10	76.6603	96.6153	-0.333771	0.0228886
ENSOART00000001970	ENSOARG00000001833	PANX1	10.4078	8.66949	0.26364	0.0229445
ENSOART00000007182	ENSOARG00000006596	WDR17	7.72421	5.63804	0.454193	0.0230535
ENSOART00000016606	ENSOARG00000015259	MAP7D2	6.88251	6.11198	0.171295	0.0230712
ENSOART00000002836	ENSOARG00000002617	SF3B5	56.6845	64.3278	-0.182486	0.0230924
ENSOART00000022772	ENSOARG00000020901	CHCHD5	28.9128	33.4911	-0.212069	0.0231851
ENSOART00000022996	ENSOARG00000021107	C14orf37	36.5386	39.7759	-0.122475	0.0231998
ENSOART00000014076	ENSOARG00000012945	CTPS2	17.4716	21.1477	-0.275489	0.0232452
ENSOART00000011883	ENSOARG00000010917	PDS5B	37.7103	27.7612	0.441887	0.0233496
ENSOART00000018943	ENSOARG00000017404	TAX1BP3	45.8894	63.436	-0.467141	0.0234605
ENSOART00000001199	ENSOARG00000001123	ALKBH3	18.7281	16.2572	0.204126	0.0234873
ENSOART00000009992	ENSOARG00000009180	SIGMAR1	9.18312	10.2109	-0.153051	0.0235405
ENSOART00000006990	ENSOARG00000006434	C1orf35	11.5405	8.77821	0.394708	0.0235411
ENSOART00000021710	ENSOARG00000019942	OLFML3	237.382	257.018	-0.114656	0.0237097
ENSOART00000018299	ENSOARG00000016806	ASPA	6.48207	17.1102	-1.40033	0.0237543
ENSOART00000017669	ENSOARG00000016225	SFXN3	3.43995	5.35844	-0.639427	0.0238158
ENSOART00000006333	ENSOARG00000005817	CHST2	5.704	6.99722	-0.294808	0.0239312
ENSOART00000013810	ENSOARG00000012701	CA5B	6.74554	4.50622	0.582017	0.0241727
ENSOART00000017784	ENSOARG00000016333	-	318.58	235.8	0.434092	0.0242374
ENSOART00000014875	ENSOARG00000013670	COX5B	309.626	350.344	-0.178247	0.0242385
ENSOART00000003811	ENSOARG00000003503	UTP4	18.2737	13.5907	0.427153	0.0243488
ENSOART00000011683	ENSOARG00000010741	FOXO3	26.5409	22.0309	0.268689	0.0244968
ENSOART00000020594	ENSOARG00000018911	PER1	8.40233	4.97711	0.755481	0.0245457
ENSOART00000005851	ENSOARG00000005369	ADI1	66.6801	92.6744	-0.474913	0.0245791
ENSOART00000020798	ENSOARG00000019101	MAP2	6.26429	3.72471	0.750022	0.0246746
ENSOART00000018831	ENSOARG00000017300	FKBP7	122.444	146.363	-0.257439	0.0247544
ENSOART00000022559	ENSOARG00000020706	SV2A	1.48917	3.87847	-1.38098	0.0247595
ENSOART00000018183	ENSOARG00000016695	MVB12A	22.1218	23.7694	-0.103636	0.0247876
ENSOART00000006751	ENSOARG00000006213	C1orf123	68.0963	71.344	-0.0672167	0.0248373
ENSOART00000014943	ENSOARG00000013712	-	9.40913	8.67242	0.117628	0.0250315
ENSOART00000017488	ENSOARG00000016057	ELP4	9.69418	11.3258	-0.224424	0.025111
ENSOART00000015539	ENSOARG00000014268	CHMP1A	23.7077	23.6041	0.00632376	0.0252109
ENSOART00000016089	ENSOARG00000014780	KIAA1324L	4.49577	4.99551	-0.152061	0.0253117
ENSOART00000000562	ENSOARG00000000523	RANGRF	21.0109	21.1898	-0.0122335	0.0253655
ENSOART00000016856	ENSOARG00000015495	ZFPM2	11.2014	9.2054	0.283121	0.0253894
ENSOART00000006362	ENSOARG00000005844	GLCCI1	7.87631	8.8466	-0.167604	0.0254306
ENSOART00000013633	ENSOARG00000012541	EXPH5	5.49056	3.41848	0.683598	0.0255014
ENSOART00000008489	ENSOARG00000007800	UTP3	15.3397	14.3865	0.0925521	0.0255125
ENSOART00000006210	ENSOARG00000005700	MARK3	33.5347	33.3421	0.00831073	0.0255184
ENSOART00000008347	ENSOARG00000007662	-	75.8238	69.6347	0.122844	0.0255572
ENSOART00000007194	ENSOARG00000006616	DGKE	8.20106	5.63289	0.541934	0.0255584
ENSOART00000004831	ENSOARG00000004438	-	32.361	29.6258	0.127404	0.0256767
ENSOART00000021599	ENSOARG00000019837	-	664.464	745.391	-0.165806	0.0257573
ENSOART00000003290	ENSOARG00000003038	-	13.1211	12.3864	0.0831375	0.0258906
ENSOART00000013412	ENSOARG00000012332	VPS51	13.2239	14.4297	-0.125893	0.0260447
ENSOART00000018109	ENSOARG00000016617	TRANK1	11.8308	8.87196	0.41522	0.0260932
ENSOART00000011456	ENSOARG00000010526	C2CD2	5.7957	9.99972	-0.786904	0.0262261
ENSOART00000011553	ENSOARG00000010615	CPD	57.0014	76.1296	-0.41746	0.0263327
ENSOART00000012788	ENSOARG00000011756	HSPH1	46.4088	36.3126	0.353928	0.0263963
ENSOART00000003501	ENSOARG00000003220	EDC4	11.6437	9.49031	0.295028	0.026415
ENSOART00000011678	ENSOARG00000010736	DFNA5	79.0749	93.9318	-0.248394	0.0264659
ENSOART00000016333	ENSOARG00000015010	ITGB1BP1	17.1793	22.4938	-0.388856	0.0265119
ENSOART00000000519	ENSOARG00000000479	TTC17	15.5243	13.3252	0.220376	0.0266534
ENSOART00000001140	ENSOARG00000001060	KDR	39.8062	49.2954	-0.308459	0.0268392
ENSOART00000009825	ENSOARG00000009016	XPNPEP1	22.0166	26.3576	-0.259628	0.026873
ENSOART00000012454	ENSOARG00000011451	SCYL3	14.0032	12.1911	0.199928	0.0269146
ENSOART00000004019	ENSOARG00000003698	BECN1	69.8408	72.1474	-0.0468775	0.0270687
ENSOART00000002625	ENSOARG00000002423	DHRS7B	12.1056	10.922	0.148435	0.0271851
ENSOART00000008915	ENSOARG00000008188	ANXA6	97.3023	117.873	-0.276685	0.027222
ENSOART00000010049	ENSOARG00000009232	PFDN6	21.7709	18.8637	0.206791	0.0272488
ENSOART00000021300	ENSOARG00000019554	ARID2	23.1457	21.2214	0.125227	0.0272759
ENSOART00000011176	ENSOARG00000010269	FAM114A1	92.8095	110.518	-0.251933	0.0272915
ENSOART00000005812	ENSOARG00000005334	TSPAN31	87.2622	95.8674	-0.135683	0.0272918
ENSOART00000019301	ENSOARG00000017738	-	12.1865	14.4145	-0.242235	0.0273396
ENSOART00000015476	ENSOARG00000014206	RAB3IL1	6.63019	8.98446	-0.438383	0.0274317
ENSOART00000016763	ENSOARG00000015407	SMIM1	4.64755	5.4737	-0.236045	0.0274469
ENSOART00000008868	ENSOARG00000008150	-	8.39823	10.6272	-0.33961	0.0275858
ENSOART00000022900	ENSOARG00000021020	CLEC1B	0.241636	1.98637	-3.03923	0.0277582
ENSOART00000000162	ENSOARG00000000157	DRAP1	62.9447	61.1632	0.0414207	0.0277783
ENSOART00000013954	ENSOARG00000012839	PM20D2	4.54315	2.44139	0.89599	0.0278087
ENSOART00000004258	ENSOARG00000003916	SMARCD3	20.5228	24.723	-0.268626	0.027943
ENSOART00000013707	ENSOARG00000012608	SNRNP70	55.7665	44.7917	0.316166	0.0280426
ENSOART00000015629	ENSOARG00000014348	DDX46	20.1677	18.1791	0.149765	0.0280815
ENSOART00000019966	ENSOARG00000018344	ALDH7A1	67.5497	73.3787	-0.119413	0.0282017
ENSOART00000015031	ENSOARG00000013812	GLS	65.6904	53.7238	0.290121	0.0283398
ENSOART00000008790	ENSOARG00000008075	WNT4	4.01648	1.38902	1.53187	0.0284878
ENSOART00000011732	ENSOARG00000010784	SLC1A5	14.6923	11.6464	0.335176	0.0287235
ENSOART00000006448	ENSOARG00000005926	PCOLCE2	17.8356	40.7311	-1.19137	0.0290844
ENSOART00000014468	ENSOARG00000013303	VLDLR	2.8794	4.4417	-0.625342	0.0291848
ENSOART00000008075	ENSOARG00000007420	YIPF3	24.4756	25.5028	-0.0593106	0.0292261
ENSOART00000006011	ENSOARG00000005512	-	10.6373	8.8474	0.265813	0.0292878
ENSOART00000012703	ENSOARG00000011676	KIF7	11.8505	8.30042	0.513693	0.0294012
ENSOART00000019359	ENSOARG00000017793	-	81.4309	47.9005	0.765536	0.0295621
ENSOART00000011348	ENSOARG00000010422	COPE	89.6211	113.61	-0.342176	0.0296026
ENSOART00000004928	ENSOARG00000004528	NRBF2	20.0019	21.2007	-0.0839772	0.0296821
ENSOART00000004583	ENSOARG00000004211	NUDT19	9.25721	11.0228	-0.251845	0.0298173
ENSOART00000010708	ENSOARG00000009830	KMT2A	8.5572	5.97776	0.517535	0.0298275
ENSOART00000019869	ENSOARG00000018260	ST8SIA4	19.839	20.9243	-0.0768414	0.0298453
ENSOART00000022766	ENSOARG00000020895	PYGO1	18.8753	17.6165	0.0995723	0.0299289
ENSOART00000008488	ENSOARG00000007798	NCK1	23.1664	22.1531	0.0645257	0.0300187
ENSOART00000010361	ENSOARG00000009512	PPME1	14.4195	16.8925	-0.228359	0.0300205
ENSOART00000007418	ENSOARG00000006823	SUGT1	34.6509	32.7081	0.0832457	0.0300372
ENSOART00000011114	ENSOARG00000010218	URM1	35.966	44.5244	-0.307963	0.030063
ENSOART00000003256	ENSOARG00000003001	SEL1L	33.3498	35.0147	-0.070285	0.0302003
ENSOART00000014004	ENSOARG00000012882	CACNB2	7.51813	5.17385	0.539134	0.030281
ENSOART00000007082	ENSOARG00000006512	INTS8	19.8332	16.7003	0.248048	0.0303147
ENSOART00000021370	ENSOARG00000019623	ERGIC2	24.0629	25.561	-0.0871349	0.0303276
ENSOART00000006630	ENSOARG00000006097	MAGED2	119.79	132.749	-0.148202	0.0304589
ENSOART00000021351	ENSOARG00000019607	-	145.5	173.938	-0.257549	0.0304711
ENSOART00000003556	ENSOARG00000003278	CCDC170	13.6631	8.78015	0.637965	0.0304717
ENSOART00000010368	ENSOARG00000009521	NIT1	7.35898	10.6955	-0.539433	0.0305833
ENSOART00000008110	ENSOARG00000007452	-	6.67217	2.20158	1.59962	0.0306947
ENSOART00000014575	ENSOARG00000013402	PTGFR	76.6096	101.688	-0.408559	0.0307142
ENSOART00000016529	ENSOARG00000015182	ASTN1	4.37569	2.85175	0.617662	0.0307145
ENSOART00000016506	ENSOARG00000015167	BCL2A1	6.1696	7.48614	-0.279043	0.0308052
ENSOART00000000733	ENSOARG00000000684	MMRN2	16.0654	17.9461	-0.159712	0.0308885
ENSOART00000011655	ENSOARG00000010711	TSPAN9	11.477	14.2259	-0.30977	0.0309061
ENSOART00000008224	ENSOARG00000007546	DCAF1	13.0556	11.2151	0.21922	0.0309409
ENSOART00000009141	ENSOARG00000008402	ZNF782	12.8859	10.1932	0.338184	0.0310006
ENSOART00000015027	ENSOARG00000013809	LURAP1L	4.95792	5.01918	-0.0177178	0.0311222
ENSOART00000007084	ENSOARG00000006514	FRMD4A	11.2414	8.28462	0.440311	0.0311708
ENSOART00000000222	ENSOARG00000000193	CADPS2	11.1055	16.5325	-0.574033	0.0312195
ENSOART00000001101	ENSOARG00000001020	BCOR	5.81073	4.39056	0.404314	0.0312601
ENSOART00000003003	ENSOARG00000002773	GMDS	18.0851	24.0901	-0.413639	0.031319
ENSOART00000011096	ENSOARG00000010183	CTTNBP2	1.87732	0.910326	1.04422	0.0313541
ENSOART00000001852	ENSOARG00000001722	-	22.0653	24.795	-0.168274	0.0314353
ENSOART00000004935	ENSOARG00000004533	UBA2	63.765	57.6126	0.146379	0.0315009
ENSOART00000018637	ENSOARG00000017125	TMEM223	17.293	18.9532	-0.132254	0.03165
ENSOART00000009019	ENSOARG00000008293	RABAC1	190.515	239.266	-0.328714	0.0318032
ENSOART00000005044	ENSOARG00000004636	-	0.40432	2.13154	-2.39833	0.0318659
ENSOART00000018359	ENSOARG00000016857	FNBP1L	68.9802	61.9734	0.154534	0.0320248
ENSOART00000008018	ENSOARG00000007369	-	15.4432	11.9546	0.369398	0.0320275
ENSOART00000012563	ENSOARG00000011551	MUM1	22.6574	25.6	-0.176162	0.0322434
ENSOART00000020555	ENSOARG00000018875	LRRC17	131.898	130.249	0.0181462	0.0322526
ENSOART00000010182	ENSOARG00000009357	-	4.29632	13.3842	-1.63936	0.0322743
ENSOART00000012719	ENSOARG00000011692	LOXL4	1.96629	1.88141	0.0636659	0.0323347
ENSOART00000006240	ENSOARG00000005732	-	22.0514	24.073	-0.12655	0.0323478
ENSOART00000005170	ENSOARG00000004746	CHID1	26.0958	30.5935	-0.229407	0.0323849
ENSOART00000012105	ENSOARG00000011127	KIF13A	14.1476	11.8344	0.257573	0.0324172
ENSOART00000005205	ENSOARG00000004772	TAOK2	17.7022	17.5774	0.0102081	0.0324627
ENSOART00000017968	ENSOARG00000016498	SLC27A1	9.01046	9.49852	-0.0761019	0.0325156
ENSOART00000009229	ENSOARG00000008477	SPEN	7.59072	5.59915	0.439029	0.0325699
ENSOART00000023086	ENSOARG00000021187	SUSD6	5.4988	3.86663	0.508041	0.0326768
ENSOART00000007234	ENSOARG00000006653	ATP5G1	62.9799	77.0111	-0.290176	0.0327602
ENSOART00000012993	ENSOARG00000011942	DDX51	8.25079	6.59005	0.324242	0.0330187
ENSOART00000012537	ENSOARG00000011531	RRP15	20.5371	18.0148	0.189051	0.0330506
ENSOART00000016315	ENSOARG00000014994	TMED3	18.2654	26.2853	-0.525139	0.0331337
ENSOART00000014065	ENSOARG00000012937	CPSF7	10.8159	8.82358	0.293722	0.0331813
ENSOART00000001233	ENSOARG00000001151	TMEM150C	64.7951	51.6972	0.3258	0.0333018
ENSOART00000009573	ENSOARG00000008787	DDX39B	132.567	110.618	0.261144	0.0333445
ENSOART00000008617	ENSOARG00000007915	HEY2	3.6263	5.1883	-0.516762	0.0333805
ENSOART00000008926	ENSOARG00000008203	CD99	10.0611	9.56206	0.0733904	0.0335135
ENSOART00000003655	ENSOARG00000003368	HNRNPH1	303.283	270.175	0.166769	0.033521
ENSOART00000011962	ENSOARG00000010987	NUP85	20.6006	25.7497	-0.321869	0.0336979
ENSOART00000016156	ENSOARG00000014847	-	4.8558	3.65908	0.408229	0.0337321
ENSOART00000021805	ENSOARG00000020027	NRAS	55.0956	59.9782	-0.122501	0.0338253
ENSOART00000010379	ENSOARG00000009528	AFF2	10.0206	10.7146	-0.0966163	0.0338422
ENSOART00000012194	ENSOARG00000011216	KPTN	11.4485	12.7583	-0.156282	0.0339728
ENSOART00000006258	ENSOARG00000005749	RAB23	55.7475	66.7311	-0.259451	0.0341071
ENSOART00000011607	ENSOARG00000010667	CDK2	11.4169	11.2382	0.0227648	0.0341336
ENSOART00000003725	ENSOARG00000003429	ZFP90	23.1094	19.1019	0.274763	0.0341477
ENSOART00000005948	ENSOARG00000005455	ELP2	16.7138	14.2253	0.23258	0.0341764
ENSOART00000000809	ENSOARG00000000756	ZNF770	18.4301	14.7987	0.316595	0.0342046
ENSOART00000018604	ENSOARG00000017093	SPRY1	17.1005	9.12442	0.906236	0.0344513
ENSOART00000004244	ENSOARG00000003903	HSP90AA1	680.532	526.112	0.371292	0.0344552
ENSOART00000017004	ENSOARG00000015628	DUSP6	2.01484	0.928513	1.11767	0.0344726
ENSOART00000002971	ENSOARG00000002743	STX8	24.675	29.1386	-0.23988	0.0344801
ENSOART00000013538	ENSOARG00000012450	-	239.301	262.37	-0.132773	0.0344898
ENSOART00000011846	ENSOARG00000010885	PHLDB1	14.5893	12.0533	0.275486	0.0345202
ENSOART00000018646	ENSOARG00000017135	SPRY2	14.8627	6.37556	1.22107	0.0345307
ENSOART00000016463	ENSOARG00000015126	JADE1	16.2448	11.9293	0.445472	0.0345464
ENSOART00000018971	ENSOARG00000017426	RELA	9.42353	6.75897	0.479465	0.0347468
ENSOART00000004748	ENSOARG00000004356	CARD11	7.73629	4.23659	0.868738	0.0349047
ENSOART00000011213	ENSOARG00000010295	NAA25	18.2337	16.0619	0.182967	0.0349499
ENSOART00000014820	ENSOARG00000013622	C17orf80	14.2438	11.6088	0.29512	0.0350302
ENSOART00000009120	ENSOARG00000008370	GPATCH8	13.8889	11.456	0.27782	0.035033
ENSOART00000018063	ENSOARG00000016583	-	18.1931	14.2536	0.352068	0.0351125
ENSOART00000022146	ENSOARG00000020336	CHP1	5.83346	3.8966	0.582137	0.0351156
ENSOART00000004724	ENSOARG00000004329	SRP72	34.3607	39.0355	-0.184027	0.0351867
ENSOART00000002352	ENSOARG00000002180	-	4.13866	5.46294	-0.400514	0.0352826
ENSOART00000009014	ENSOARG00000008286	PTGES3	81.2381	67.5083	0.267091	0.0352974
ENSOART00000021999	ENSOARG00000020205	CCDC14	10.2685	8.03188	0.354419	0.0353017
ENSOART00000022365	ENSOARG00000020533	-	30.9755	41.9078	-0.436092	0.0353243
ENSOART00000022012	ENSOARG00000020214	-	9.18179	7.33818	0.323353	0.035462
ENSOART00000004927	ENSOARG00000004526	NR1D2	41.4088	33.0854	0.323743	0.0356196
ENSOART00000014908	ENSOARG00000013701	MRPS33	79.7413	86.082	-0.110385	0.0356647
ENSOART00000022614	ENSOARG00000020759	-	62.6165	73.3342	-0.227943	0.0358278
ENSOART00000005774	ENSOARG00000005291	CFI	10.703	8.73211	0.293607	0.0358665
ENSOART00000017682	ENSOARG00000016234	CNIH4	25.4386	26.0216	-0.0326914	0.0360019
ENSOART00000018418	ENSOARG00000016912	SLC16A3	3.3346	1.56555	1.09085	0.0360969
ENSOART00000006487	ENSOARG00000005950	ARAP1	16.3849	13.3474	0.295807	0.0362648
ENSOART00000019889	ENSOARG00000018279	LARGE1	10.8325	15.8979	-0.553474	0.0363251
ENSOART00000019310	ENSOARG00000017741	RBBP6	14.0052	11.535	0.279946	0.0363828
ENSOART00000001848	ENSOARG00000001717	GOT2	55.4358	63.7813	-0.202316	0.0364338
ENSOART00000009478	ENSOARG00000008702	-	4.89617	6.1213	-0.322184	0.0366697
ENSOART00000000785	ENSOARG00000000732	XPC	21.7706	19.8755	0.131387	0.0366744
ENSOART00000008950	ENSOARG00000008225	-	42.8383	49.0021	-0.193941	0.0367057
ENSOART00000007636	ENSOARG00000007018	-	67.0984	82.5377	-0.298775	0.0367315
ENSOART00000004245	ENSOARG00000003900	BMS1	27.8678	25.3366	0.137377	0.0368026
ENSOART00000012644	ENSOARG00000011626	TUBB	315.166	327.902	-0.0571524	0.0368958
ENSOART00000012097	ENSOARG00000011122	CLEC3B	132.439	139.729	-0.0773032	0.0369759
ENSOART00000019774	ENSOARG00000018172	TMEM205	15.8548	17.8235	-0.168863	0.0370148
ENSOART00000005677	ENSOARG00000005209	SDC4	27.1203	18.6033	0.543814	0.0370171
ENSOART00000021199	ENSOARG00000019466	LRIF1	15.9155	10.6959	0.573374	0.0370752
ENSOART00000010409	ENSOARG00000009556	MICU3	50.8747	39.2022	0.376013	0.0372369
ENSOART00000014527	ENSOARG00000013354	EPC1	36.3654	31.7185	0.197242	0.0372609
ENSOART00000000440	ENSOARG00000000413	CHMP6	19.3837	20.5426	-0.0837714	0.0372821
ENSOART00000017021	ENSOARG00000015643	ZNF326	40.9286	36.7293	0.156178	0.0373139
ENSOART00000016066	ENSOARG00000014764	ZNF175	26.3837	20.7932	0.343531	0.037374
ENSOART00000002343	ENSOARG00000002173	PLAC8	4.05615	6.34132	-0.644671	0.0375328
ENSOART00000010557	ENSOARG00000009682	RICTOR	27.7125	21.6341	0.357231	0.037616
ENSOART00000008277	ENSOARG00000007598	MSANTD3-TMEFF1	8.26376	8.48477	-0.0380779	0.0376232
ENSOART00000021839	ENSOARG00000020061	UGP2	59.8303	64.5983	-0.11062	0.0377138
ENSOART00000012300	ENSOARG00000011313	-	452.825	519.233	-0.19743	0.0378062
ENSOART00000005128	ENSOARG00000004704	LRIG3	23.1661	17.5857	0.397617	0.037824
ENSOART00000012301	ENSOARG00000011314	RRP1B	12.8003	11.5006	0.154465	0.037959
ENSOART00000000205	ENSOARG00000000194	ATF2	55.7651	47.8521	0.220778	0.0379758
ENSOART00000005761	ENSOARG00000005289	COX7A1	87.5621	85.0496	0.0420022	0.0379848
ENSOART00000016035	ENSOARG00000014733	-	30.0399	34.9721	-0.219326	0.0380319
ENSOART00000022965	ENSOARG00000021079	S100A11	38.1747	51.1999	-0.423523	0.0380962
ENSOART00000017366	ENSOARG00000015947	GLRX5	14.9212	21.2368	-0.509204	0.0381236
ENSOART00000016748	ENSOARG00000015390	-	0.473008	1.56789	-1.72888	0.0383468
ENSOART00000003713	ENSOARG00000003416	WASF2	16.7627	13.8717	0.273112	0.038348
ENSOART00000008038	ENSOARG00000007379	DOPEY1	13.6409	11.1409	0.292066	0.038563
ENSOART00000006521	ENSOARG00000006000	B4GALT7	24.0371	24.2216	-0.0110287	0.0387193
ENSOART00000020922	ENSOARG00000019212	PSME2	30.4707	31.1773	-0.0330736	0.0389277
ENSOART00000022875	ENSOARG00000020997	PSMB4	198.712	229.798	-0.209689	0.0389496
ENSOART00000004700	ENSOARG00000004316	RUNDC1	5.9611	4.1523	0.521668	0.0390338
ENSOART00000018172	ENSOARG00000016684	SCEL	1.49014	1.56005	-0.066142	0.039059
ENSOART00000000628	ENSOARG00000000583	-	4.77529	2.40775	0.987899	0.0391015
ENSOART00000018188	ENSOARG00000016696	-	6.82869	8.04297	-0.236118	0.0394027
ENSOART00000009874	ENSOARG00000009068	RSU1	80.1651	92.4266	-0.205334	0.0395125
ENSOART00000002553	ENSOARG00000002358	-	38.2004	45.9775	-0.267339	0.0395277
ENSOART00000011177	ENSOARG00000010272	DUSP4	4.78491	1.86118	1.36228	0.0395774
ENSOART00000004349	ENSOARG00000004004	-	34.4932	46.4002	-0.427817	0.0397214
ENSOART00000010105	ENSOARG00000009285	-	13.3354	15.11	-0.180243	0.0398046
ENSOART00000002852	ENSOARG00000002635	-	5.34377	2.69163	0.989377	0.0399794
ENSOART00000006314	ENSOARG00000005798	-	61.6414	33.6645	0.872674	0.040154
ENSOART00000009071	ENSOARG00000008339	-	6.02735	3.10968	0.954756	0.0401711
ENSOART00000012821	ENSOARG00000011789	PRDX6	141.452	132.35	0.0959504	0.0402129
ENSOART00000020682	ENSOARG00000018989	NEO1	15.4149	14.0321	0.135593	0.0403554
ENSOART00000021131	ENSOARG00000019403	REM2	2.5996	0.733874	1.82469	0.0405185
ENSOART00000017663	ENSOARG00000016220	COPZ1	57.5926	64.4571	-0.162455	0.0405208
ENSOART00000010106	ENSOARG00000009282	SPOUT1	7.21163	6.83219	0.0779765	0.0406175
ENSOART00000012248	ENSOARG00000011263	DAPK3	18.2797	17.5427	0.0593669	0.0408564
ENSOART00000003878	ENSOARG00000003573	RNF2	31.3171	26.412	0.245757	0.040915
ENSOART00000021519	ENSOARG00000019763	-	2.84096	0.831878	1.77193	0.0410261
ENSOART00000007308	ENSOARG00000006726	HSPB11	25.8963	19.7396	0.391656	0.0410502
ENSOART00000007372	ENSOARG00000006781	-	7.23622	5.13018	0.496226	0.0411661
ENSOART00000001791	ENSOARG00000001662	DTWD2	12.2609	9.20596	0.413426	0.0411953
ENSOART00000020588	ENSOARG00000018904	PARP6	8.46203	6.65356	0.346878	0.0412038
ENSOART00000020218	ENSOARG00000018577	-	281.093	335.01	-0.253157	0.0412259
ENSOART00000018942	ENSOARG00000017397	RHOBTB3	77.6487	84.9604	-0.12983	0.0412571
ENSOART00000005780	ENSOARG00000005301	HLF	7.84677	4.00944	0.968699	0.0412912
ENSOART00000010141	ENSOARG00000009320	MMADHC	90.3724	98.7957	-0.128567	0.0414228
ENSOART00000008241	ENSOARG00000007570	PLPPR1	10.1848	36.7452	-1.85114	0.0415681
ENSOART00000018585	ENSOARG00000017070	-	26.9785	21.7382	0.311579	0.041594
ENSOART00000010500	ENSOARG00000009644	NHLRC3	17.9303	16.8392	0.0905784	0.0415962
ENSOART00000018664	ENSOARG00000017150	LHFPL2	11.2351	12.4852	-0.152209	0.0416833
ENSOART00000018265	ENSOARG00000016773	-	8.80229	4.51779	0.962261	0.0417117
ENSOART00000000403	ENSOARG00000000372	RBM26	34.5068	29.0856	0.246575	0.0417371
ENSOART00000002963	ENSOARG00000002720	VAV2	13.2294	10.5191	0.330733	0.0417639
ENSOART00000003276	ENSOARG00000003024	TSSC4	5.03927	5.67802	-0.172176	0.0418107
ENSOART00000022074	ENSOARG00000020271	LRCH3	42.1829	36.3726	0.213806	0.0418413
ENSOART00000007027	ENSOARG00000006466	C14orf2	84.573	101.439	-0.262341	0.0419214
ENSOART00000000599	ENSOARG00000000557	PRPF4B	80.8674	67.8393	0.253438	0.0421679
ENSOART00000005297	ENSOARG00000004861	STXBP6	8.24317	5.16037	0.675724	0.0421902
ENSOART00000010550	ENSOARG00000009693	FOXP1	31.4746	25.9676	0.277478	0.042463
ENSOART00000002905	ENSOARG00000002682	NTN1	1.0819	3.38182	-1.64423	0.0424908
ENSOART00000000169	ENSOARG00000000161	-	92.9409	101.879	-0.132471	0.0425759
ENSOART00000009566	ENSOARG00000008783	BSG	202.535	238.626	-0.236579	0.042693
ENSOART00000007638	ENSOARG00000007020	-	17.1664	15.8346	0.116507	0.0427615
ENSOART00000021159	ENSOARG00000019430	RBM15	18.5314	17.5602	0.0776634	0.0429962
ENSOART00000007167	ENSOARG00000006593	NIPAL3	12.5755	12.2499	0.0378366	0.0431004
ENSOART00000006514	ENSOARG00000005989	MKLN1	37.4809	31.6343	0.244666	0.0431606
ENSOART00000003408	ENSOARG00000003141	NT5DC2	16.1751	21.9894	-0.443038	0.0431667
ENSOART00000008116	ENSOARG00000007453	-	9.63808	10.3958	-0.109189	0.0431812
ENSOART00000014797	ENSOARG00000013600	KIAA2026	11.5934	9.79384	0.243352	0.043269
ENSOART00000021080	ENSOARG00000019358	FNDC4	18.7683	14.2788	0.394421	0.0433212
ENSOART00000000782	ENSOARG00000000726	-	40.174	40.4229	-0.00891171	0.0433266
ENSOART00000012382	ENSOARG00000011392	ASNA1	14.7149	16.6986	-0.182449	0.0434002
ENSOART00000007328	ENSOARG00000006739	G6PC3	8.66951	7.94185	0.126476	0.0434571
ENSOART00000021728	ENSOARG00000019959	-	16.6427	18.8842	-0.182289	0.0434651
ENSOART00000018547	ENSOARG00000017037	-	45.3992	22.3434	1.02282	0.0436301
ENSOART00000002159	ENSOARG00000002011	-	5.3507	3.13543	0.771066	0.0436626
ENSOART00000006012	ENSOARG00000005518	GPX7	17.1313	27.5868	-0.68734	0.0437284
ENSOART00000001053	ENSOARG00000000985	-	29.6772	19.7413	0.58814	0.0438001
ENSOART00000003375	ENSOARG00000003100	C20orf194	17.0644	14.1351	0.271713	0.0438156
ENSOART00000010494	ENSOARG00000009639	-	2.09894	2.04298	0.0389855	0.0438224
ENSOART00000007832	ENSOARG00000007202	SPON1	183.19	316.125	-0.787154	0.0438821
ENSOART00000003577	ENSOARG00000003296	KLC2	5.01376	3.36841	0.573826	0.0439346
ENSOART00000022263	ENSOARG00000020442	NOTCH2	56.5115	45.6555	0.307757	0.0439914
ENSOART00000021016	ENSOARG00000019298	CD200	31.4719	9.84311	1.67688	0.0440225
ENSOART00000011323	ENSOARG00000010408	FAM19A4	3.04895	8.86422	-1.53968	0.0440244
ENSOART00000021809	ENSOARG00000020030	SPRED1	21.9352	16.1045	0.445785	0.0441919
ENSOART00000001756	ENSOARG00000001630	SLC39A1	51.3418	63.0073	-0.295384	0.0443789
ENSOART00000007213	ENSOARG00000006640	BLVRB	24.8431	22.1633	0.164672	0.0444426
ENSOART00000013377	ENSOARG00000012303	-	6.81803	1.08369	2.6534	0.0444912
ENSOART00000018059	ENSOARG00000016577	MRPL17	49.5519	65.4952	-0.40245	0.0445302
ENSOART00000013735	ENSOARG00000012635	RABGGTB	39.7284	50.5811	-0.348428	0.0445734
ENSOART00000022543	ENSOARG00000020690	NDUFB5	86.424	108.374	-0.326514	0.0445748
ENSOART00000018392	ENSOARG00000016887	APOO	16.7878	19.3302	-0.203441	0.0446153
ENSOART00000002795	ENSOARG00000002583	-	21.2286	23.6515	-0.155921	0.0446394
ENSOART00000006626	ENSOARG00000006078	COL27A1	17.3783	10.956	0.665558	0.0446501
ENSOART00000001477	ENSOARG00000001379	CAV2	63.076	52.0879	0.276142	0.0447506
ENSOART00000005465	ENSOARG00000005020	-	127.218	133.171	-0.0659814	0.0448124
ENSOART00000010177	ENSOARG00000009351	C7orf73	48.3959	61.0472	-0.335041	0.0448125
ENSOART00000014390	ENSOARG00000013238	SLC39A8	6.89416	7.40989	-0.104077	0.0449288
ENSOART00000021172	ENSOARG00000019441	RHOB	46.4936	36.7215	0.340406	0.0451319
ENSOART00000014284	ENSOARG00000013137	APAF1	20.2844	23.503	-0.212473	0.0451512
ENSOART00000005482	ENSOARG00000005034	HSPB6	5.35402	9.01363	-0.751485	0.0452077
ENSOART00000011124	ENSOARG00000010228	CHCHD2	86.4524	89.4706	-0.049507	0.0452938
ENSOART00000004891	ENSOARG00000004497	ZNF445	20.2407	17.025	0.2496	0.0453206
ENSOART00000017282	ENSOARG00000015871	CRADD	14.1656	13.2711	0.094112	0.0453769
ENSOART00000002970	ENSOARG00000002740	HSF4	7.71374	3.64211	1.08266	0.0455383
ENSOART00000021290	ENSOARG00000019548	B3GNT2	95.6366	55.4703	0.785847	0.0456743
ENSOART00000015558	ENSOARG00000014285	MPHOSPH8	15.4682	13.1325	0.236161	0.0457024
ENSOART00000002906	ENSOARG00000002680	TIAL1	30.2086	29.2228	0.0478648	0.045775
ENSOART00000018999	ENSOARG00000017455	NUDT6	10.9435	8.3954	0.382403	0.0460716
ENSOART00000014678	ENSOARG00000013491	GRIA3	22.5403	12.7857	0.817979	0.0461697
ENSOART00000013744	ENSOARG00000012643	WNT11	1.43453	5.30401	-1.88651	0.0462232
ENSOART00000009200	ENSOARG00000008452	ARL5A	33.3177	25.9406	0.361079	0.0463601
ENSOART00000022648	ENSOARG00000020787	ATF7IP	24.6237	25.8638	-0.0708857	0.0463627
ENSOART00000022223	ENSOARG00000020404	MGA	27.0468	23.7515	0.18744	0.0464519
ENSOART00000008554	ENSOARG00000007856	-	37.545	31.3763	0.258949	0.046518
ENSOART00000007609	ENSOARG00000006997	HMGN3	126.237	125.14	0.0125902	0.0465279
ENSOART00000004150	ENSOARG00000003814	MATN2	32.1621	35.8151	-0.155209	0.0465573
ENSOART00000009517	ENSOARG00000008740	VMA21	18.6814	22.3439	-0.25828	0.0466496
ENSOART00000018730	ENSOARG00000017214	NR4A1	37.6607	6.6675	2.49784	0.046772
ENSOART00000013428	ENSOARG00000012350	-	13.6999	19.0421	-0.475029	0.0468636
ENSOART00000012833	ENSOARG00000011800	CCNC	47.1497	56.0153	-0.248572	0.0469131
ENSOART00000022885	ENSOARG00000021006	COPS2	93.9374	87.0115	0.110494	0.0469181
ENSOART00000014762	ENSOARG00000013569	EVA1C	4.87405	2.93577	0.73138	0.0469897
ENSOART00000002577	ENSOARG00000002378	SGCE	59.9233	84.6638	-0.498627	0.0470905
ENSOART00000019041	ENSOARG00000017493	SEPT11	71.4581	56.3911	0.341629	0.0471798
ENSOART00000016531	ENSOARG00000015191	SHBG	4.82132	3.48887	0.466671	0.0472809
ENSOART00000017085	ENSOARG00000015693	FAM13B	15.4319	9.06148	0.768097	0.0473134
ENSOART00000002826	ENSOARG00000002588	EPG5	12.0441	9.48183	0.345086	0.047385
ENSOART00000017412	ENSOARG00000015984	ARIH2	29.8008	27.4725	0.117367	0.0474548
ENSOART00000001152	ENSOARG00000001076	NPC2	142.921	172.92	-0.274889	0.0474571
ENSOART00000011665	ENSOARG00000010725	-	28.9673	28.0277	0.047575	0.0474763
ENSOART00000022693	ENSOARG00000020830	HEBP1	72.9105	72.508	0.00798501	0.0475599
ENSOART00000022730	ENSOARG00000020863	GCOM1	10.1731	9.60301	0.0832017	0.0476286
ENSOART00000019107	ENSOARG00000017556	NOLC1	26.7648	22.0725	0.278081	0.0477139
ENSOART00000000035	ENSOARG00000000035	CYTB	146.918	119.497	0.298036	0.0477839
ENSOART00000016971	ENSOARG00000015600	-	38.5704	39.9409	-0.0503715	0.0478193
ENSOART00000005922	ENSOARG00000005431	MOCOS	7.65082	9.83259	-0.361958	0.0478355
ENSOART00000000176	ENSOARG00000000170	ATP5G3	246.674	291.105	-0.238931	0.0478721
ENSOART00000007330	ENSOARG00000006742	LRRC42	11.9652	17.3517	-0.536236	0.0480652
ENSOART00000009810	ENSOARG00000009006	NSRP1	15.6468	13.1089	0.255321	0.0480909
ENSOART00000009512	ENSOARG00000008728	PAPSS1	42.2133	47.6396	-0.174465	0.0481506
ENSOART00000016827	ENSOARG00000015467	DRAM1	3.69602	7.09164	-0.940147	0.0482298
ENSOART00000007177	ENSOARG00000006604	FKBP9	44.5125	56.6398	-0.347607	0.0483404
ENSOART00000022773	ENSOARG00000020902	MINDY1	25.6542	30.7259	-0.260259	0.0484733
ENSOART00000019378	ENSOARG00000017814	ARL5B	20.9794	21.489	-0.0346224	0.0486715
ENSOART00000014473	ENSOARG00000013306	ALPK3	18.3032	16.032	0.191146	0.0486905
ENSOART00000000118	ENSOARG00000000113	FAM204A	28.5265	40.0476	-0.489413	0.0487231
ENSOART00000007301	ENSOARG00000006717	-	35.0164	30.0374	0.221271	0.0487461
ENSOART00000003534	ENSOARG00000003246	IKBKB	11.4182	9.4517	0.27269	0.0488657
ENSOART00000005502	ENSOARG00000005048	RNF214	10.6268	7.61423	0.480936	0.0488676
ENSOART00000016223	ENSOARG00000014906	CCDC167	28.4458	35.9912	-0.339427	0.0489097
ENSOART00000010447	ENSOARG00000009580	LAMA4	44.8749	41.3222	0.118992	0.0489616
ENSOART00000005204	ENSOARG00000004769	-	72.6472	71.0833	0.031395	0.0489934
ENSOART00000008058	ENSOARG00000007405	C4BPA	10.916	4.94127	1.14349	0.0490367
ENSOART00000005792	ENSOARG00000005314	NUDT1	7.8199	7.74881	0.0131745	0.0490598
ENSOART00000013775	ENSOARG00000012673	RCAN1	54.9405	20.0194	1.45647	0.0491016
ENSOART00000011452	ENSOARG00000010528	SLCO3A1	15.819	11.281	0.48776	0.0491919
ENSOART00000018670	ENSOARG00000017147	NCOR1	26.9416	23.7265	0.18334	0.0493566
ENSOART00000018779	ENSOARG00000017251	-	22.7576	25.8922	-0.18617	0.0494067
ENSOART00000002305	ENSOARG00000002137	-	6.70574	16.8814	-1.33196	0.0494262
ENSOART00000008463	ENSOARG00000007776	OSTC	124.377	186.112	-0.581447	0.0495007
ENSOART00000003863	ENSOARG00000003554	DSTYK	20.6408	24.2056	-0.229839	0.0495576
ENSOART00000004578	ENSOARG00000004208	C8orf4	74.4774	53.9432	0.465361	0.0495998
ENSOART00000010128	ENSOARG00000009308	-	0.0140803	13.977	-9.95516	0.0496074
ENSOART00000002052	ENSOARG00000001903	PITPNB	32.9304	25.0641	0.393799	0.0497269
ENSOART00000018469	ENSOARG00000016957	N4BP1	11.6492	10.9091	0.0946867	0.0497511
ENSOART00000010986	ENSOARG00000010099	PPP1R3B	7.52203	11.9961	-0.673369	0.049776
ENSOART00000001139	ENSOARG00000001051	REPS1	16.241	12.517	0.375751	0.049803
ENSOART00000022985	ENSOARG00000021096	KTN1	50.8816	45.7984	0.151849	0.0499253
ENSOART00000009441	ENSOARG00000008672	CDC34	20.8136	22.6297	-0.120691	0.0499264
