# Supplementary material for: Comprehensive Analysis of Differentially Expressed CircRNAs in the Ovaries of Low- and High-Fertility Sheep
Source: Animals (Basel). 2023 Jan 9;13(2):236. doi: 10.3390/ani13020236 (PMC9854751; doi:10.3390/ani13020236)
Supplement: Supplementary file 1 [file animals-13-00236-s001.zip › Supplementary table S6.xlsx]

## Sheet: Sheet1
ID	Qira_E_readcount	Hetian_E_readcount	log2FoldChange	pval	log2FoldChange	miRNA	Qira_E_readcount	Hetian_E_readcount	log2FoldChange	pval	transcript_id	gene_id	gene_name	Qira_E_FPKM	Hetian_E_FPKM	log2(foldchange)	pvalue
novel_circ_0008117	644.441	287.62	1.123	5.2491e-07	1.123	oar-miR-17-5p	2096.5	3096.19	-0.52129	0.017787	ENSOART00000016856	ENSOARG00000015495	ZFPM2	11.2014	9.2054	0.283121	0.0253894
novel_circ_0032347	28.875	8.47802	1.2083	0.02621	1.2083	oar-miR-17-5p	2096.5	3096.19	-0.52129	0.017787	ENSOART00000016856	ENSOARG00000015495	ZFPM2	11.2014	9.2054	0.283121	0.0253894
novel_circ_0027336	39.3833	15.801	1.0547	0.02717	1.0547	oar-miR-17-5p	2096.5	3096.19	-0.52129	0.017787	ENSOART00000016856	ENSOARG00000015495	ZFPM2	11.2014	9.2054	0.283121	0.0253894
novel_circ_0033045	3.0302	13.0652	-1.2166	0.037649	-1.2166	oar-miR-29a	38593	24335.1	0.63384	0.00038858	ENSOART00000008816	ENSOARG00000008102	CUEDC1	19.179	23.6829	-0.304316	0.0153416
novel_circ_0033045	3.0302	13.0652	-1.2166	0.037649	-1.2166	oar-miR-29a	38593	24335.1	0.63384	0.00038858	ENSOART00000009218	ENSOARG00000008469	KPNB1	85.0367	94.0732	-0.145697	0.0140025
novel_circ_0003094	5.77367	18.7639	-1.1501	0.039175	-1.1501	oar-miR-29a	38593	24335.1	0.63384	0.00038858	ENSOART00000008816	ENSOARG00000008102	CUEDC1	19.179	23.6829	-0.304316	0.0153416
novel_circ_0003094	5.77367	18.7639	-1.1501	0.039175	-1.1501	oar-miR-29a	38593	24335.1	0.63384	0.00038858	ENSOART00000009218	ENSOARG00000008469	KPNB1	85.0367	94.0732	-0.145697	0.0140025
novel_circ_0007224	6.76525	21.8719	-1.1369	0.038982	-1.1369	oar-miR-29a	38593	24335.1	0.63384	0.00038858	ENSOART00000008816	ENSOARG00000008102	CUEDC1	19.179	23.6829	-0.304316	0.0153416
novel_circ_0007224	6.76525	21.8719	-1.1369	0.038982	-1.1369	oar-miR-29a	38593	24335.1	0.63384	0.00038858	ENSOART00000009218	ENSOARG00000008469	KPNB1	85.0367	94.0732	-0.145697	0.0140025
novel_circ_0015526	2.32934	15.3116	-1.3471	0.023359	-1.3471	oar-miR-29a	38593	24335.1	0.63384	0.00038858	ENSOART00000008816	ENSOARG00000008102	CUEDC1	19.179	23.6829	-0.304316	0.0153416
novel_circ_0015526	2.32934	15.3116	-1.3471	0.023359	-1.3471	oar-miR-29a	38593	24335.1	0.63384	0.00038858	ENSOART00000009218	ENSOARG00000008469	KPNB1	85.0367	94.0732	-0.145697	0.0140025
novel_circ_0003851	18.3702	53.4113	-1.2796	0.0035143	-1.2796	oar-miR-29a	38593	24335.1	0.63384	0.00038858	ENSOART00000008816	ENSOARG00000008102	CUEDC1	19.179	23.6829	-0.304316	0.0153416
novel_circ_0003851	18.3702	53.4113	-1.2796	0.0035143	-1.2796	oar-miR-29a	38593	24335.1	0.63384	0.00038858	ENSOART00000009218	ENSOARG00000008469	KPNB1	85.0367	94.0732	-0.145697	0.0140025
novel_circ_0011620	19.0957	45.5257	-1.0049	0.032862	-1.0049	oar-miR-29a	38593	24335.1	0.63384	0.00038858	ENSOART00000008816	ENSOARG00000008102	CUEDC1	19.179	23.6829	-0.304316	0.0153416
novel_circ_0011620	19.0957	45.5257	-1.0049	0.032862	-1.0049	oar-miR-29a	38593	24335.1	0.63384	0.00038858	ENSOART00000009218	ENSOARG00000008469	KPNB1	85.0367	94.0732	-0.145697	0.0140025
novel_circ_0007224	6.76525	21.8719	-1.1369	0.038982	-1.1369	oar-miR-29b	1685.98	756.113	1.0908	2.7715e-08	ENSOART00000009218	ENSOARG00000008469	KPNB1	85.0367	94.0732	-0.145697	0.0140025
novel_circ_0033045	3.0302	13.0652	-1.2166	0.037649	-1.2166	oar-miR-29b	1685.98	756.113	1.0908	2.7715e-08	ENSOART00000009218	ENSOARG00000008469	KPNB1	85.0367	94.0732	-0.145697	0.0140025
novel_circ_0003094	5.77367	18.7639	-1.1501	0.039175	-1.1501	oar-miR-29b	1685.98	756.113	1.0908	2.7715e-08	ENSOART00000009218	ENSOARG00000008469	KPNB1	85.0367	94.0732	-0.145697	0.0140025
novel_circ_0003851	18.3702	53.4113	-1.2796	0.0035143	-1.2796	oar-miR-29b	1685.98	756.113	1.0908	2.7715e-08	ENSOART00000009218	ENSOARG00000008469	KPNB1	85.0367	94.0732	-0.145697	0.0140025
novel_circ_0011620	19.0957	45.5257	-1.0049	0.032862	-1.0049	oar-miR-29b	1685.98	756.113	1.0908	2.7715e-08	ENSOART00000009218	ENSOARG00000008469	KPNB1	85.0367	94.0732	-0.145697	0.0140025
novel_circ_0015526	2.32934	15.3116	-1.3471	0.023359	-1.3471	oar-miR-29b	1685.98	756.113	1.0908	2.7715e-08	ENSOART00000009218	ENSOARG00000008469	KPNB1	85.0367	94.0732	-0.145697	0.0140025
novel_circ_0000458	0	5.31535	-1.0471	0.048925	-1.0471	novel_181	21.2904	9.42399	0.87601	0.01853	ENSOART00000008075	ENSOARG00000007420	YIPF3	24.4756	25.5028	-0.0593106	0.0292261
