# Supplementary material for: Comprehensive Analysis of Differentially Expressed CircRNAs in the Ovaries of Low- and High-Fertility Sheep
Source: Animals (Basel). 2023 Jan 9;13(2):236. doi: 10.3390/ani13020236 (PMC9854751; doi:10.3390/ani13020236)
Supplement: Supplementary file 1 [file animals-13-00236-s001.zip › Supplementary table S7.xlsx]

## Sheet: Sheet1
Sample	Raw Reads	Q30	Clean Reads	CircRNA Number
Positive	71319010	0.91196	71057452	3880
Negative	66272360	0.806165	65974754	3666
