# Supplementary material for: Comprehensive Analysis of Differentially Expressed CircRNAs in the Ovaries of Low- and High-Fertility Sheep
Source: Animals (Basel). 2023 Jan 9;13(2):236. doi: 10.3390/ani13020236 (PMC9854751; doi:10.3390/ani13020236)
Supplement: Supplementary file 1 [file animals-13-00236-s001.zip › Supplementary table S8.xlsx]

## Sheet: Sheet1
Differentially expressed circRNAs for: up_Positive_vs_Negative Fold Change cut-off: 2.00 P-value cut-off: 1 Column A: CircRNAID, the ID of the identified circRNA by DCC. Column B ~ F: edgeR results for differentially expressed circRNAs. Column G ~ H: junction reads, the junction read number of each sample. Column I ~ J: logCPM by edgeR. Column k ~ N: the coordinates of circRNA.
	Positive_vs_Negative up regulated circRNAs
	P-value, Fold change and Regulation					junction reads		logCPM by edgeR		Annotations
CircRNAID	logFC	logCPM	PValue	FDR	regulation	Positive	Negative	Positive	Negative	chrom	txStart	txEnd	strand
14:60802602-60832971-	9.57397	11.6375	0.0369026	0.804102	up	191	0	12.6095	3.03553	14	60802601	60832971	-
1:71463521-71490453+	9.43967	11.5059	0.0393421	0.804102	up	174	0	12.4752	3.03553	1	71463520	71490453	+
21:40274169-40274369-	8.8681	10.9491	0.0513769	0.804102	up	117	0	11.9036	3.03553	21	40274168	40274369	-
1:77205283-77239847+	8.49052	10.5849	0.0614343	0.804102	up	90	0	11.526	3.03553	1	77205282	77239847	+
25:27821824-27822318-	7.72938	9.8634	0.0880467	0.804102	up	53	0	10.7649	3.03553	25	27821823	27822318	-
3:102040573-102041288-	6.91355	9.11829	0.129346	0.804102	up	30	0	9.94909	3.03553	3	102040572	102041288	-
14:23444740-23481003+	6.86506	9.07525	0.132331	0.804102	up	29	0	9.90059	3.03553	14	23444739	23481003	+
4:114526896-114539539+	6.81487	9.03088	0.13549	0.804102	up	28	0	9.8504	3.03553	4	114526895	114539539	+
13:77504758-77510624+	6.76288	8.9851	0.138843	0.804102	up	27	0	9.79841	3.03553	13	77504757	77510624	+
3:78266467-78273162-	6.76288	8.9851	0.138843	0.804102	up	27	0	9.79841	3.03553	3	78266466	78273162	-
4:68469461-68560460+	6.70894	8.93782	0.142406	0.804102	up	26	0	9.74448	3.03553	4	68469460	68560460	+
20:49532388-49535394-	6.70894	8.93782	0.142406	0.804102	up	26	0	9.74448	3.03553	20	49532387	49535394	-
3:6509137-6522279+	6.65291	8.88894	0.146204	0.804102	up	25	0	9.68844	3.03553	3	6509136	6522279	+
12:39395924-39399231-	6.47044	8.73151	0.159274	0.804102	up	22	0	9.50597	3.03553	12	39395923	39399231	-
23:53781407-53782961-	6.47044	8.73151	0.159274	0.804102	up	22	0	9.50597	3.03553	23	53781406	53782961	-
9:77402159-77447118-	6.4041	8.67496	0.164305	0.804102	up	21	0	9.43963	3.03553	9	77402158	77447118	-
26:40562571-40568548+	6.4041	8.67496	0.164305	0.804102	up	21	0	9.43963	3.03553	26	40562570	40568548	+
6:94305709-94323392-	6.33456	8.61611	0.169745	0.804102	up	20	0	9.37009	3.03553	6	94305708	94323392	-
4:61437413-61443523+	6.2615	8.55476	0.175651	0.804102	up	19	0	9.29703	3.03553	4	61437412	61443523	+
14:23725372-23727408+	6.2615	8.55476	0.175651	0.804102	up	19	0	9.29703	3.03553	14	23725371	23727408	+
4:85665376-85685591+	6.2615	8.55476	0.175651	0.804102	up	19	0	9.29703	3.03553	4	85665375	85685591	+
1:9812723-9817394-	6.18454	8.49068	0.18209	0.804102	up	18	0	9.22008	3.03553	1	9812722	9817394	-
4:95198431-95201645+	6.18454	8.49068	0.18209	0.804102	up	18	0	9.22008	3.03553	4	95198430	95201645	+
12:28263773-28270484-	6.18454	8.49068	0.18209	0.804102	up	18	0	9.22008	3.03553	12	28263772	28270484	-
4:23075971-23124882-	6.18454	8.49068	0.18209	0.804102	up	18	0	9.22008	3.03553	4	23075970	23124882	-
21:40272799-40277209+	6.18454	8.49068	0.18209	0.804102	up	18	0	9.22008	3.03553	21	40272798	40277209	+
19:35202828-35223555-	6.10325	8.42362	0.189143	0.804102	up	17	0	9.13878	3.03553	19	35202827	35223555	-
X:89513785-89513938+	6.10325	8.42362	0.189143	0.804102	up	17	0	9.13878	3.03553	X	89513784	89513938	+
X:120384074-120399806-	6.10325	8.42362	0.189143	0.804102	up	17	0	9.13878	3.03553	X	120384073	120399806	-
23:870490-937162-	6.10325	8.42362	0.189143	0.804102	up	17	0	9.13878	3.03553	23	870489	937162	-
13:51506900-51508527-	6.0171	8.35329	0.196907	0.804102	up	16	0	9.05263	3.03553	13	51506899	51508527	-
9:82188250-82199243-	6.0171	8.35329	0.196907	0.804102	up	16	0	9.05263	3.03553	9	82188249	82199243	-
8:57002971-57015154+	6.0171	8.35329	0.196907	0.804102	up	16	0	9.05263	3.03553	8	57002970	57015154	+
8:5690915-5691074-	6.0171	8.35329	0.196907	0.804102	up	16	0	9.05263	3.03553	8	5690914	5691074	-
9:77342934-77411675-	6.0171	8.35329	0.196907	0.804102	up	16	0	9.05263	3.03553	9	77342933	77411675	-
9:76888270-76908799+	5.92547	8.27935	0.205506	0.804102	up	15	0	8.961	3.03553	9	76888269	76908799	+
20:2915557-2918586-	5.92547	8.27935	0.205506	0.804102	up	15	0	8.961	3.03553	20	2915556	2918586	-
7:99411439-99470265-	5.92547	8.27935	0.205506	0.804102	up	15	0	8.961	3.03553	7	99411438	99470265	-
2:206178008-206215958+	5.92547	8.27935	0.205506	0.804102	up	15	0	8.961	3.03553	2	206178007	206215958	+
7:89160639-89190774-	5.92547	8.27935	0.205506	0.804102	up	15	0	8.961	3.03553	7	89160638	89190774	-
20:31897961-31898901+	5.92547	8.27935	0.205506	0.804102	up	15	0	8.961	3.03553	20	31897960	31898901	+
8:82878683-82879138-	5.92547	8.27935	0.205506	0.804102	up	15	0	8.961	3.03553	8	82878682	82879138	-
14:51115840-51118070+	5.92547	8.27935	0.205506	0.804102	up	15	0	8.961	3.03553	14	51115839	51118070	+
X:38866711-38932527-	5.92547	8.27935	0.205506	0.804102	up	15	0	8.961	3.03553	X	38866710	38932527	-
23:40348215-40365277-	5.92547	8.27935	0.205506	0.804102	up	15	0	8.961	3.03553	23	40348214	40365277	-
1:240124581-240127297-	5.82763	8.20142	0.215091	0.804102	up	14	0	8.86316	3.03553	1	240124580	240127297	-
12:55343202-55378118-	5.82763	8.20142	0.215091	0.804102	up	14	0	8.86316	3.03553	12	55343201	55378118	-
11:47030187-47050829+	5.82763	8.20142	0.215091	0.804102	up	14	0	8.86316	3.03553	11	47030186	47050829	+
22:41165062-41173215+	5.82763	8.20142	0.215091	0.804102	up	14	0	8.86316	3.03553	22	41165061	41173215	+
5:10629565-10630096-	5.82763	8.20142	0.215091	0.804102	up	14	0	8.86316	3.03553	5	10629564	10630096	-
1:200557074-200586766-	5.82763	8.20142	0.215091	0.804102	up	14	0	8.86316	3.03553	1	200557073	200586766	-
16:37190223-37197220-	5.82763	8.20142	0.215091	0.804102	up	14	0	8.86316	3.03553	16	37190222	37197220	-
X:62856323-62875445-	5.82763	8.20142	0.215091	0.804102	up	14	0	8.86316	3.03553	X	62856322	62875445	-
1:67802695-67879660-	5.82763	8.20142	0.215091	0.804102	up	14	0	8.86316	3.03553	1	67802694	67879660	-
18:63701322-63711401+	5.72267	8.11904	0.225856	0.804102	up	13	0	8.7582	3.03553	18	63701321	63711401	+
3:46434379-46442926+	5.72267	8.11904	0.225856	0.804102	up	13	0	8.7582	3.03553	3	46434378	46442926	+
26:7417085-7418202-	5.72267	8.11904	0.225856	0.804102	up	13	0	8.7582	3.03553	26	7417084	7418202	-
23:50730976-50744138+	5.72267	8.11904	0.225856	0.804102	up	13	0	8.7582	3.03553	23	50730975	50744138	+
14:45959056-45963852-	5.72267	8.11904	0.225856	0.804102	up	13	0	8.7582	3.03553	14	45959055	45963852	-
18:10855384-10860991-	5.72267	8.11904	0.225856	0.804102	up	13	0	8.7582	3.03553	18	10855383	10860991	-
3:11944633-11958363+	5.72267	8.11904	0.225856	0.804102	up	13	0	8.7582	3.03553	3	11944632	11958363	+
10:29904207-29916863-	5.72267	8.11904	0.225856	0.804102	up	13	0	8.7582	3.03553	10	29904206	29916863	-
18:11831349-11875263-	5.72267	8.11904	0.225856	0.804102	up	13	0	8.7582	3.03553	18	11831348	11875263	-
1:71463521-71503766+	5.72267	8.11904	0.225856	0.804102	up	13	0	8.7582	3.03553	1	71463520	71503766	+
21:12277239-12282474+	5.60947	8.03167	0.238051	0.804102	up	12	0	8.645	3.03553	21	12277238	12282474	+
16:41125229-41130512+	5.60947	8.03167	0.238051	0.804102	up	12	0	8.645	3.03553	16	41125228	41130512	+
2:14179464-14197666+	5.60947	8.03167	0.238051	0.804102	up	12	0	8.645	3.03553	2	14179463	14197666	+
1:231559477-231578268-	5.60947	8.03167	0.238051	0.804102	up	12	0	8.645	3.03553	1	231559476	231578268	-
1:61277744-61283756-	5.60947	8.03167	0.238051	0.804102	up	12	0	8.645	3.03553	1	61277743	61283756	-
25:24813580-24819879+	5.60947	8.03167	0.238051	0.804102	up	12	0	8.645	3.03553	25	24813579	24819879	+
3:65475462-65486101-	5.60947	8.03167	0.238051	0.804102	up	12	0	8.645	3.03553	3	65475461	65486101	-
21:40271953-40277131+	5.60947	8.03167	0.238051	0.804102	up	12	0	8.645	3.03553	21	40271952	40277131	+
X:64082869-64084949+	5.60947	8.03167	0.238051	0.804102	up	12	0	8.645	3.03553	X	64082868	64084949	+
26:25254301-25259257+	5.60947	8.03167	0.238051	0.804102	up	12	0	8.645	3.03553	26	25254300	25259257	+
6:17612777-17633188+	5.60947	8.03167	0.238051	0.804102	up	12	0	8.645	3.03553	6	17612776	17633188	+
7:99111008-99128569-	5.60947	8.03167	0.238051	0.804102	up	12	0	8.645	3.03553	7	99111007	99128569	-
17:3952711-3959040-	5.60947	8.03167	0.238051	0.804102	up	12	0	8.645	3.03553	17	3952710	3959040	-
8:47965087-47974937+	5.60947	8.03167	0.238051	0.804102	up	12	0	8.645	3.03553	8	47965086	47974937	+
8:25402691-25412202+	5.60947	8.03167	0.238051	0.804102	up	12	0	8.645	3.03553	8	25402690	25412202	+
15:31752594-31753052+	5.60947	8.03167	0.238051	0.804102	up	12	0	8.645	3.03553	15	31752593	31753052	+
22:40701259-40776160-	5.60947	8.03167	0.238051	0.804102	up	12	0	8.645	3.03553	22	40701258	40776160	-
24:28032989-28033934+	5.60947	8.03167	0.238051	0.804102	up	12	0	8.645	3.03553	24	28032988	28033934	+
X:21470490-21474045+	5.60947	8.03167	0.238051	0.804102	up	12	0	8.645	3.03553	X	21470489	21474045	+
1:99992875-99996032-	5.48662	7.93866	0.252005	0.804102	up	11	0	8.52215	3.03553	1	99992874	99996032	-
6:58034355-58037234-	5.48662	7.93866	0.252005	0.804102	up	11	0	8.52215	3.03553	6	58034354	58037234	-
3:90617337-90623624-	5.48662	7.93866	0.252005	0.804102	up	11	0	8.52215	3.03553	3	90617336	90623624	-
8:10061994-10076482-	5.48662	7.93866	0.252005	0.804102	up	11	0	8.52215	3.03553	8	10061993	10076482	-
4:44066495-44077366+	5.48662	7.93866	0.252005	0.804102	up	11	0	8.52215	3.03553	4	44066494	44077366	+
9:77339937-77407790-	5.48662	7.93866	0.252005	0.804102	up	11	0	8.52215	3.03553	9	77339936	77407790	-
7:12411345-12416025-	5.48662	7.93866	0.252005	0.804102	up	11	0	8.52215	3.03553	7	12411344	12416025	-
17:5032277-5055797+	5.48662	7.93866	0.252005	0.804102	up	11	0	8.52215	3.03553	17	5032276	5055797	+
X:62875363-62890820-	5.48662	7.93866	0.252005	0.804102	up	11	0	8.52215	3.03553	X	62875362	62890820	-
11:11655569-11717846-	5.48662	7.93866	0.252005	0.804102	up	11	0	8.52215	3.03553	11	11655568	11717846	-
23:919126-937162-	5.48662	7.93866	0.252005	0.804102	up	11	0	8.52215	3.03553	23	919125	937162	-
22:45752012-45789539+	5.48662	7.93866	0.252005	0.804102	up	11	0	8.52215	3.03553	22	45752011	45789539	+
11:17350798-17354532-	5.48662	7.93866	0.252005	0.804102	up	11	0	8.52215	3.03553	11	17350797	17354532	-
10:35862425-35862947+	5.48662	7.93866	0.252005	0.804102	up	11	0	8.52215	3.03553	10	35862424	35862947	+
7:79538094-79558849+	5.48662	7.93866	0.252005	0.804102	up	11	0	8.52215	3.03553	7	79538093	79558849	+
8:25402691-25404587+	5.48662	7.93866	0.252005	0.804102	up	11	0	8.52215	3.03553	8	25402690	25404587	+
2:37317405-37338644+	5.48662	7.93866	0.252005	0.804102	up	11	0	8.52215	3.03553	2	37317404	37338644	+
2:33814814-33840269+	5.48662	7.93866	0.252005	0.804102	up	11	0	8.52215	3.03553	2	33814813	33840269	+
1:85124293-85142136+	5.48662	7.93866	0.252005	0.804102	up	11	0	8.52215	3.03553	1	85124292	85142136	+
4:95095031-95167105+	5.48662	7.93866	0.252005	0.804102	up	11	0	8.52215	3.03553	4	95095030	95167105	+
11:35776585-35788902-	5.35233	7.83924	0.268159	0.804102	up	10	0	8.38786	3.03553	11	35776584	35788902	-
25:14193184-14196515+	5.35233	7.83924	0.268159	0.804102	up	10	0	8.38786	3.03553	25	14193183	14196515	+
10:26588680-26592574-	5.35233	7.83924	0.268159	0.804102	up	10	0	8.38786	3.03553	10	26588679	26592574	-
20:31937258-31938473-	5.35233	7.83924	0.268159	0.804102	up	10	0	8.38786	3.03553	20	31937257	31938473	-
14:16240064-16245836+	5.35233	7.83924	0.268159	0.804102	up	10	0	8.38786	3.03553	14	16240063	16245836	+
8:78096365-78103451+	5.35233	7.83924	0.268159	0.804102	up	10	0	8.38786	3.03553	8	78096364	78103451	+
17:12478987-12482174-	5.35233	7.83924	0.268159	0.804102	up	10	0	8.38786	3.03553	17	12478986	12482174	-
1:53762925-53778083-	5.35233	7.83924	0.268159	0.804102	up	10	0	8.38786	3.03553	1	53762924	53778083	-
20:50851412-50854216+	5.35233	7.83924	0.268159	0.804102	up	10	0	8.38786	3.03553	20	50851411	50854216	+
25:14209596-14224514+	5.35233	7.83924	0.268159	0.804102	up	10	0	8.38786	3.03553	25	14209595	14224514	+
12:58551345-58554949-	5.35233	7.83924	0.268159	0.804102	up	10	0	8.38786	3.03553	12	58551344	58554949	-
1:114836472-114837967+	5.35233	7.83924	0.268159	0.804102	up	10	0	8.38786	3.03553	1	114836471	114837967	+
2:204149246-204159720+	5.35233	7.83924	0.268159	0.804102	up	10	0	8.38786	3.03553	2	204149245	204159720	+
23:32680135-32750841+	5.35233	7.83924	0.268159	0.804102	up	10	0	8.38786	3.03553	23	32680134	32750841	+
16:8070478-8077513-	5.35233	7.83924	0.268159	0.804102	up	10	0	8.38786	3.03553	16	8070477	8077513	-
1:139565343-139602048-	5.35233	7.83924	0.268159	0.804102	up	10	0	8.38786	3.03553	1	139565342	139602048	-
X:15190529-15200478+	5.35233	7.83924	0.268159	0.804102	up	10	0	8.38786	3.03553	X	15190528	15200478	+
15:41708926-41720412+	5.35233	7.83924	0.268159	0.804102	up	10	0	8.38786	3.03553	15	41708925	41720412	+
21:40271953-40275616+	5.35233	7.83924	0.268159	0.804102	up	10	0	8.38786	3.03553	21	40271952	40275616	+
20:36259797-36358173-	5.35233	7.83924	0.268159	0.804102	up	10	0	8.38786	3.03553	20	36259796	36358173	-
23:61847753-61862208-	5.35233	7.83924	0.268159	0.804102	up	10	0	8.38786	3.03553	23	61847752	61862208	-
3:216313872-216314048+	5.35233	7.83924	0.268159	0.804102	up	10	0	8.38786	3.03553	3	216313871	216314048	+
2:173949112-173953445-	5.35233	7.83924	0.268159	0.804102	up	10	0	8.38786	3.03553	2	173949111	173953445	-
19:20735091-20748830-	5.35233	7.83924	0.268159	0.804102	up	10	0	8.38786	3.03553	19	20735090	20748830	-
1:100282087-100283344-	5.35233	7.83924	0.268159	0.804102	up	10	0	8.38786	3.03553	1	100282086	100283344	-
X:109921791-109925492-	5.35233	7.83924	0.268159	0.804102	up	10	0	8.38786	3.03553	X	109921790	109925492	-
13:64178513-64199758-	5.35233	7.83924	0.268159	0.804102	up	10	0	8.38786	3.03553	13	64178512	64199758	-
3:69297490-69297772+	5.35233	7.83924	0.268159	0.804102	up	10	0	8.38786	3.03553	3	69297489	69297772	+
6:58259254-58290963+	5.35233	7.83924	0.268159	0.804102	up	10	0	8.38786	3.03553	6	58259253	58290963	+
22:41189943-41197301+	5.35233	7.83924	0.268159	0.804102	up	10	0	8.38786	3.03553	22	41189942	41197301	+
4:88028570-88031409-	5.20424	7.73246	0.287124	0.804102	up	9	0	8.23978	3.03553	4	88028569	88031409	-
18:10855384-10876598-	5.20424	7.73246	0.287124	0.804102	up	9	0	8.23978	3.03553	18	10855383	10876598	-
13:59833976-59836564+	5.20424	7.73246	0.287124	0.804102	up	9	0	8.23978	3.03553	13	59833975	59836564	+
11:36366175-36368310-	5.20424	7.73246	0.287124	0.804102	up	9	0	8.23978	3.03553	11	36366174	36368310	-
19:51741088-51757738+	5.20424	7.73246	0.287124	0.804102	up	9	0	8.23978	3.03553	19	51741087	51757738	+
17:52528234-52528466-	5.20424	7.73246	0.287124	0.804102	up	9	0	8.23978	3.03553	17	52528233	52528466	-
10:33348342-33362755-	5.20424	7.73246	0.287124	0.804102	up	9	0	8.23978	3.03553	10	33348341	33362755	-
4:103828364-103833353-	5.20424	7.73246	0.287124	0.804102	up	9	0	8.23978	3.03553	4	103828363	103833353	-
26:25254301-25295094+	5.20424	7.73246	0.287124	0.804102	up	9	0	8.23978	3.03553	26	25254300	25295094	+
9:76888270-76937402+	5.20424	7.73246	0.287124	0.804102	up	9	0	8.23978	3.03553	9	76888269	76937402	+
8:68736580-68753979+	5.20424	7.73246	0.287124	0.804102	up	9	0	8.23978	3.03553	8	68736579	68753979	+
4:50550306-50551081+	5.20424	7.73246	0.287124	0.804102	up	9	0	8.23978	3.03553	4	50550305	50551081	+
8:54836662-54837630+	5.20424	7.73246	0.287124	0.804102	up	9	0	8.23978	3.03553	8	54836661	54837630	+
2:174473174-174476999-	5.20424	7.73246	0.287124	0.804102	up	9	0	8.23978	3.03553	2	174473173	174476999	-
10:34657819-34679312-	5.20424	7.73246	0.287124	0.804102	up	9	0	8.23978	3.03553	10	34657818	34679312	-
16:12479305-12483574-	5.20424	7.73246	0.287124	0.804102	up	9	0	8.23978	3.03553	16	12479304	12483574	-
3:32814023-32874601-	5.20424	7.73246	0.287124	0.804102	up	9	0	8.23978	3.03553	3	32814022	32874601	-
6:15930582-15933422-	5.20424	7.73246	0.287124	0.804102	up	9	0	8.23978	3.03553	6	15930581	15933422	-
8:32324678-32331920+	5.20424	7.73246	0.287124	0.804102	up	9	0	8.23978	3.03553	8	32324677	32331920	+
11:18263005-18263922-	5.20424	7.73246	0.287124	0.804102	up	9	0	8.23978	3.03553	11	18263004	18263922	-
X:130382958-130384606-	5.20424	7.73246	0.287124	0.804102	up	9	0	8.23978	3.03553	X	130382957	130384606	-
23:35076512-35099472-	5.20424	7.73246	0.287124	0.804102	up	9	0	8.23978	3.03553	23	35076511	35099472	-
5:85636228-85648776-	5.20424	7.73246	0.287124	0.804102	up	9	0	8.23978	3.03553	5	85636227	85648776	-
2:230946081-230981082-	5.20424	7.73246	0.287124	0.804102	up	9	0	8.23978	3.03553	2	230946080	230981082	-
2:242627674-242629946+	5.0392	7.61713	0.309768	0.804102	up	8	0	8.07474	3.03553	2	242627673	242629946	+
7:48265793-48284148-	5.0392	7.61713	0.309768	0.804102	up	8	0	8.07474	3.03553	7	48265792	48284148	-
19:7686713-7692504-	5.0392	7.61713	0.309768	0.804102	up	8	0	8.07474	3.03553	19	7686712	7692504	-
4:9966382-10021282-	5.0392	7.61713	0.309768	0.804102	up	8	0	8.07474	3.03553	4	9966381	10021282	-
5:12022569-12024939+	5.0392	7.61713	0.309768	0.804102	up	8	0	8.07474	3.03553	5	12022568	12024939	+
13:29130754-29169596-	5.0392	7.61713	0.309768	0.804102	up	8	0	8.07474	3.03553	13	29130753	29169596	-
2:230919626-230921504-	5.0392	7.61713	0.309768	0.804102	up	8	0	8.07474	3.03553	2	230919625	230921504	-
24:2064901-2071882+	5.0392	7.61713	0.309768	0.804102	up	8	0	8.07474	3.03553	24	2064900	2071882	+
7:57355033-57388111+	5.0392	7.61713	0.309768	0.804102	up	8	0	8.07474	3.03553	7	57355032	57388111	+
24:37872164-37876598-	5.0392	7.61713	0.309768	0.804102	up	8	0	8.07474	3.03553	24	37872163	37876598	-
4:9243027-9245309+	5.0392	7.61713	0.309768	0.804102	up	8	0	8.07474	3.03553	4	9243026	9245309	+
11:60705418-60711067-	5.0392	7.61713	0.309768	0.804102	up	8	0	8.07474	3.03553	11	60705417	60711067	-
9:71877082-71877237-	5.0392	7.61713	0.309768	0.804102	up	8	0	8.07474	3.03553	9	71877081	71877237	-
2:69847641-69854517+	5.0392	7.61713	0.309768	0.804102	up	8	0	8.07474	3.03553	2	69847640	69854517	+
5:57335032-57338099+	5.0392	7.61713	0.309768	0.804102	up	8	0	8.07474	3.03553	5	57335031	57338099	+
4:85920446-85923847-	5.0392	7.61713	0.309768	0.804102	up	8	0	8.07474	3.03553	4	85920445	85923847	-
X:18796171-18812223+	5.0392	7.61713	0.309768	0.804102	up	8	0	8.07474	3.03553	X	18796170	18812223	+
1:253192357-253223969+	5.0392	7.61713	0.309768	0.804102	up	8	0	8.07474	3.03553	1	253192356	253223969	+
11:61179445-61183955-	5.0392	7.61713	0.309768	0.804102	up	8	0	8.07474	3.03553	11	61179444	61183955	-
1:19912093-19912343+	5.0392	7.61713	0.309768	0.804102	up	8	0	8.07474	3.03553	1	19912092	19912343	+
19:36769255-36769490+	5.0392	7.61713	0.309768	0.804102	up	8	0	8.07474	3.03553	19	36769254	36769490	+
10:12675767-12733994+	5.0392	7.61713	0.309768	0.804102	up	8	0	8.07474	3.03553	10	12675766	12733994	+
2:102490168-102497426-	5.0392	7.61713	0.309768	0.804102	up	8	0	8.07474	3.03553	2	102490167	102497426	-
18:13279359-13298168-	5.0392	7.61713	0.309768	0.804102	up	8	0	8.07474	3.03553	18	13279358	13298168	-
2:35605481-35676271+	5.0392	7.61713	0.309768	0.804102	up	8	0	8.07474	3.03553	2	35605480	35676271	+
3:184536215-184556687+	5.0392	7.61713	0.309768	0.804102	up	8	0	8.07474	3.03553	3	184536214	184556687	+
1:267235916-267247544-	5.0392	7.61713	0.309768	0.804102	up	8	0	8.07474	3.03553	1	267235915	267247544	-
15:41708926-41726571+	5.0392	7.61713	0.309768	0.804102	up	8	0	8.07474	3.03553	15	41708925	41726571	+
20:29301078-29302924+	5.0392	7.61713	0.309768	0.804102	up	8	0	8.07474	3.03553	20	29301077	29302924	+
14:56370506-56373586-	5.0392	7.61713	0.309768	0.804102	up	8	0	8.07474	3.03553	14	56370505	56373586	-
7:66576503-66582576+	5.0392	7.61713	0.309768	0.804102	up	8	0	8.07474	3.03553	7	66576502	66582576	+
7:73523442-73536533-	5.0392	7.61713	0.309768	0.804102	up	8	0	8.07474	3.03553	7	73523441	73536533	-
22:50103562-50106942+	5.0392	7.61713	0.309768	0.804102	up	8	0	8.07474	3.03553	22	50103561	50106942	+
1:211941840-211969141-	5.0392	7.61713	0.309768	0.804102	up	8	0	8.07474	3.03553	1	211941839	211969141	-
X:82694212-82694784-	5.0392	7.61713	0.309768	0.804102	up	8	0	8.07474	3.03553	X	82694211	82694784	-
1:90229536-90230374-	5.0392	7.61713	0.309768	0.804102	up	8	0	8.07474	3.03553	1	90229535	90230374	-
25:24321241-24357546-	5.0392	7.61713	0.309768	0.804102	up	8	0	8.07474	3.03553	25	24321240	24357546	-
3:128381570-128382100-	5.0392	7.61713	0.309768	0.804102	up	8	0	8.07474	3.03553	3	128381569	128382100	-
8:48295859-48346953+	5.0392	7.61713	0.309768	0.804102	up	8	0	8.07474	3.03553	8	48295858	48346953	+
8:16824748-16825063-	5.0392	7.61713	0.309768	0.804102	up	8	0	8.07474	3.03553	8	16824747	16825063	-
18:59904160-59931582-	5.0392	7.61713	0.309768	0.804102	up	8	0	8.07474	3.03553	18	59904159	59931582	-
2:112581478-112583712-	5.0392	7.61713	0.309768	0.804102	up	8	0	8.07474	3.03553	2	112581477	112583712	-
3:127388266-127388474+	5.0392	7.61713	0.309768	0.804102	up	8	0	8.07474	3.03553	3	127388265	127388474	+
6:110628049-110640959+	5.0392	7.61713	0.309768	0.804102	up	8	0	8.07474	3.03553	6	110628048	110640959	+
13:3335341-3342183+	5.0392	7.61713	0.309768	0.804102	up	8	0	8.07474	3.03553	13	3335340	3342183	+
21:16979756-16992082+	5.0392	7.61713	0.309768	0.804102	up	8	0	8.07474	3.03553	21	16979755	16992082	+
22:43404813-43409927-	5.0392	7.61713	0.309768	0.804102	up	8	0	8.07474	3.03553	22	43404812	43409927	-
23:21737887-21758127-	5.0392	7.61713	0.309768	0.804102	up	8	0	8.07474	3.03553	23	21737886	21758127	-
5:67701161-67770267-	5.0392	7.61713	0.309768	0.804102	up	8	0	8.07474	3.03553	5	67701160	67770267	-
15:41437625-41438112+	5.0392	7.61713	0.309768	0.804102	up	8	0	8.07474	3.03553	15	41437624	41438112	+
23:20511960-20523946-	5.0392	7.61713	0.309768	0.804102	up	8	0	8.07474	3.03553	23	20511959	20523946	-
1:76440658-76442228+	5.0392	7.61713	0.309768	0.804102	up	8	0	8.07474	3.03553	1	76440657	76442228	+
2:168298385-168305343+	5.0392	7.61713	0.309768	0.804102	up	8	0	8.07474	3.03553	2	168298384	168305343	+
19:36619631-36619964+	5.0392	7.61713	0.309768	0.804102	up	8	0	8.07474	3.03553	19	36619630	36619964	+
7:55780743-55799534+	5.0392	7.61713	0.309768	0.804102	up	8	0	8.07474	3.03553	7	55780742	55799534	+
X:29686817-29724664-	5.0392	7.61713	0.309768	0.804102	up	8	0	8.07474	3.03553	X	29686816	29724664	-
X:38354904-38358791+	5.0392	7.61713	0.309768	0.804102	up	8	0	8.07474	3.03553	X	38354903	38358791	+
4:118046402-118049973+	5.0392	7.61713	0.309768	0.804102	up	8	0	8.07474	3.03553	4	118046401	118049973	+
24:27603569-27605746+	5.0392	7.61713	0.309768	0.804102	up	8	0	8.07474	3.03553	24	27603568	27605746	+
24:38500498-38507305+	5.0392	7.61713	0.309768	0.804102	up	8	0	8.07474	3.03553	24	38500497	38507305	+
23:870490-965428-	5.0392	7.61713	0.309768	0.804102	up	8	0	8.07474	3.03553	23	870489	965428	-
17:70768803-70769316+	5.0392	7.61713	0.309768	0.804102	up	8	0	8.07474	3.03553	17	70768802	70769316	+
17:4641605-4663931-	5.0392	7.61713	0.309768	0.804102	up	8	0	8.07474	3.03553	17	4641604	4663931	-
11:8319287-8319582+	5.0392	7.61713	0.309768	0.804102	up	8	0	8.07474	3.03553	11	8319286	8319582	+
6:85672130-85674483-	5.0392	7.61713	0.309768	0.804102	up	8	0	8.07474	3.03553	6	85672129	85674483	-
12:41549692-41565280-	5.0392	7.61713	0.309768	0.804102	up	8	0	8.07474	3.03553	12	41549691	41565280	-
12:74660085-74673184-	5.0392	7.61713	0.309768	0.804102	up	8	0	8.07474	3.03553	12	74660084	74673184	-
3:162085134-162085303+	5.0392	7.61713	0.309768	0.804102	up	8	0	8.07474	3.03553	3	162085133	162085303	+
6:5376278-5379930+	5.0392	7.61713	0.309768	0.804102	up	8	0	8.07474	3.03553	6	5376277	5379930	+
3:90602654-90617456-	5.0392	7.61713	0.309768	0.804102	up	8	0	8.07474	3.03553	3	90602653	90617456	-
4:103551132-103552840-	5.0392	7.61713	0.309768	0.804102	up	8	0	8.07474	3.03553	4	103551131	103552840	-
6:17119012-17166540-	5.0392	7.61713	0.309768	0.804102	up	8	0	8.07474	3.03553	6	17119011	17166540	-
X:64726436-64764664+	5.0392	7.61713	0.309768	0.804102	up	8	0	8.07474	3.03553	X	64726435	64764664	+
7:35095794-35096010-	5.0392	7.61713	0.309768	0.804102	up	8	0	8.07474	3.03553	7	35095793	35096010	-
6:36521603-36534216+	5.0392	7.61713	0.309768	0.804102	up	8	0	8.07474	3.03553	6	36521602	36534216	+
9:76245205-76245625+	5.0392	7.61713	0.309768	0.804102	up	8	0	8.07474	3.03553	9	76245204	76245625	+
10:30743740-30766752+	5.0392	7.61713	0.309768	0.804102	up	8	0	8.07474	3.03553	10	30743739	30766752	+
9:29184746-29186902+	5.0392	7.61713	0.309768	0.804102	up	8	0	8.07474	3.03553	9	29184745	29186902	+
12:54205880-54228323+	5.0392	7.61713	0.309768	0.804102	up	8	0	8.07474	3.03553	12	54205879	54228323	+
3:70244275-70246641+	5.0392	7.61713	0.309768	0.804102	up	8	0	8.07474	3.03553	3	70244274	70246641	+
12:74673059-74689586-	5.0392	7.61713	0.309768	0.804102	up	8	0	8.07474	3.03553	12	74673058	74689586	-
6:17612777-17618338+	5.0392	7.61713	0.309768	0.804102	up	8	0	8.07474	3.03553	6	17612776	17618338	+
16:4850228-4861570+	5.0392	7.61713	0.309768	0.804102	up	8	0	8.07474	3.03553	16	4850227	4861570	+
7:84992072-84993737+	5.0392	7.61713	0.309768	0.804102	up	8	0	8.07474	3.03553	7	84992071	84993737	+
17:558037-578755+	5.0392	7.61713	0.309768	0.804102	up	8	0	8.07474	3.03553	17	558036	578755	+
3:112556752-112558268+	5.0392	7.61713	0.309768	0.804102	up	8	0	8.07474	3.03553	3	112556751	112558268	+
2:75859837-75887483-	5.0392	7.61713	0.309768	0.804102	up	8	0	8.07474	3.03553	2	75859836	75887483	-
12:58271501-58295746+	5.0392	7.61713	0.309768	0.804102	up	8	0	8.07474	3.03553	12	58271500	58295746	+
X:62856315-62857785-	5.0392	7.61713	0.309768	0.804102	up	8	0	8.07474	3.03553	X	62856314	62857785	-
23:50724255-50754431+	5.0392	7.61713	0.309768	0.804102	up	8	0	8.07474	3.03553	23	50724254	50754431	+
1:189850398-189893219-	5.0392	7.61713	0.309768	0.804102	up	8	0	8.07474	3.03553	1	189850397	189893219	-
2:2709480-2716807+	5.0392	7.61713	0.309768	0.804102	up	8	0	8.07474	3.03553	2	2709479	2716807	+
3:220655824-220657331-	5.0392	7.61713	0.309768	0.804102	up	8	0	8.07474	3.03553	3	220655823	220657331	-
6:85673288-85679064-	5.0392	7.61713	0.309768	0.804102	up	8	0	8.07474	3.03553	6	85673287	85679064	-
8:60454521-60499952-	5.0392	7.61713	0.309768	0.804102	up	8	0	8.07474	3.03553	8	60454520	60499952	-
14:48857841-48858046-	5.0392	7.61713	0.309768	0.804102	up	8	0	8.07474	3.03553	14	48857840	48858046	-
11:12051310-12055563+	5.0392	7.61713	0.309768	0.804102	up	8	0	8.07474	3.03553	11	12051309	12055563	+
9:77701742-77743282-	5.0392	7.61713	0.309768	0.804102	up	8	0	8.07474	3.03553	9	77701741	77743282	-
1:188534951-188555561-	5.0392	7.61713	0.309768	0.804102	up	8	0	8.07474	3.03553	1	188534950	188555561	-
1:224205884-224210061-	5.0392	7.61713	0.309768	0.804102	up	8	0	8.07474	3.03553	1	224205883	224210061	-
22:33131463-33132330+	4.85281	7.49177	0.337376	0.804102	up	7	0	7.88834	3.03553	22	33131462	33132330	+
17:34333376-34375954-	4.85281	7.49177	0.337376	0.804102	up	7	0	7.88834	3.03553	17	34333375	34375954	-
7:42680110-42718808-	4.85281	7.49177	0.337376	0.804102	up	7	0	7.88834	3.03553	7	42680109	42718808	-
3:181860200-181864555-	4.85281	7.49177	0.337376	0.804102	up	7	0	7.88834	3.03553	3	181860199	181864555	-
22:377014-391029+	4.85281	7.49177	0.337376	0.804102	up	7	0	7.88834	3.03553	22	377013	391029	+
13:20678020-20714386+	4.85281	7.49177	0.337376	0.804102	up	7	0	7.88834	3.03553	13	20678019	20714386	+
1:213891787-213925284+	4.85281	7.49177	0.337376	0.804102	up	7	0	7.88834	3.03553	1	213891786	213925284	+
8:10061994-10084045-	4.85281	7.49177	0.337376	0.804102	up	7	0	7.88834	3.03553	8	10061993	10084045	-
10:12668040-12676164+	4.85281	7.49177	0.337376	0.804102	up	7	0	7.88834	3.03553	10	12668039	12676164	+
1:143455364-143477281+	4.85281	7.49177	0.337376	0.804102	up	7	0	7.88834	3.03553	1	143455363	143477281	+
7:58024421-58028055-	4.85281	7.49177	0.337376	0.804102	up	7	0	7.88834	3.03553	7	58024420	58028055	-
10:77178839-77187483-	4.85281	7.49177	0.337376	0.804102	up	7	0	7.88834	3.03553	10	77178838	77187483	-
13:45593224-45613188+	4.85281	7.49177	0.337376	0.804102	up	7	0	7.88834	3.03553	13	45593223	45613188	+
2:210669768-210695444-	4.85281	7.49177	0.337376	0.804102	up	7	0	7.88834	3.03553	2	210669767	210695444	-
6:29803054-29804051-	4.85281	7.49177	0.337376	0.804102	up	7	0	7.88834	3.03553	6	29803053	29804051	-
17:51518204-51519278-	4.85281	7.49177	0.337376	0.804102	up	7	0	7.88834	3.03553	17	51518203	51519278	-
7:89160639-89218628-	4.85281	7.49177	0.337376	0.804102	up	7	0	7.88834	3.03553	7	89160638	89218628	-
20:48969621-48972008+	4.85281	7.49177	0.337376	0.804102	up	7	0	7.88834	3.03553	20	48969620	48972008	+
X:89513573-89513786+	4.85281	7.49177	0.337376	0.804102	up	7	0	7.88834	3.03553	X	89513572	89513786	+
9:81896128-81917293-	4.85281	7.49177	0.337376	0.804102	up	7	0	7.88834	3.03553	9	81896127	81917293	-
17:35102005-35118157-	4.85281	7.49177	0.337376	0.804102	up	7	0	7.88834	3.03553	17	35102004	35118157	-
2:204184946-204200030+	4.85281	7.49177	0.337376	0.804102	up	7	0	7.88834	3.03553	2	204184945	204200030	+
9:83113635-83115571-	4.85281	7.49177	0.337376	0.804102	up	7	0	7.88834	3.03553	9	83113634	83115571	-
20:26945169-27018264+	4.85281	7.49177	0.337376	0.804102	up	7	0	7.88834	3.03553	20	26945168	27018264	+
X:75666373-75669641+	4.85281	7.49177	0.337376	0.804102	up	7	0	7.88834	3.03553	X	75666372	75669641	+
19:29890036-29932685+	4.85281	7.49177	0.337376	0.804102	up	7	0	7.88834	3.03553	19	29890035	29932685	+
17:64983185-64984325+	4.85281	7.49177	0.337376	0.804102	up	7	0	7.88834	3.03553	17	64983184	64984325	+
12:52937322-52943967-	4.85281	7.49177	0.337376	0.804102	up	7	0	7.88834	3.03553	12	52937321	52943967	-
22:22809390-22809902-	4.85281	7.49177	0.337376	0.804102	up	7	0	7.88834	3.03553	22	22809389	22809902	-
5:66464310-66465365-	4.85281	7.49177	0.337376	0.804102	up	7	0	7.88834	3.03553	5	66464309	66465365	-
6:6436863-6445613-	4.85281	7.49177	0.337376	0.804102	up	7	0	7.88834	3.03553	6	6436862	6445613	-
12:64921689-64947063+	4.85281	7.49177	0.337376	0.804102	up	7	0	7.88834	3.03553	12	64921688	64947063	+
17:29701611-29709319-	4.85281	7.49177	0.337376	0.804102	up	7	0	7.88834	3.03553	17	29701610	29709319	-
8:68724416-68793271+	4.85281	7.49177	0.337376	0.804102	up	7	0	7.88834	3.03553	8	68724415	68793271	+
24:17090599-17091460+	4.85281	7.49177	0.337376	0.804102	up	7	0	7.88834	3.03553	24	17090598	17091460	+
2:82913694-82916283-	4.85281	7.49177	0.337376	0.804102	up	7	0	7.88834	3.03553	2	82913693	82916283	-
3:131277521-131301565+	4.85281	7.49177	0.337376	0.804102	up	7	0	7.88834	3.03553	3	131277520	131301565	+
4:95198431-95207704+	4.85281	7.49177	0.337376	0.804102	up	7	0	7.88834	3.03553	4	95198430	95207704	+
3:12498236-12500962+	4.85281	7.49177	0.337376	0.804102	up	7	0	7.88834	3.03553	3	12498235	12500962	+
3:39673106-39723619-	4.85281	7.49177	0.337376	0.804102	up	7	0	7.88834	3.03553	3	39673105	39723619	-
3:91352027-91361015-	4.85281	7.49177	0.337376	0.804102	up	7	0	7.88834	3.03553	3	91352026	91361015	-
4:15983785-16044026+	4.85281	7.49177	0.337376	0.804102	up	7	0	7.88834	3.03553	4	15983784	16044026	+
X:62834477-62875445-	4.85281	7.49177	0.337376	0.804102	up	7	0	7.88834	3.03553	X	62834476	62875445	-
7:79497893-79507862+	4.85281	7.49177	0.337376	0.804102	up	7	0	7.88834	3.03553	7	79497892	79507862	+
14:42815559-42817029+	4.85281	7.49177	0.337376	0.804102	up	7	0	7.88834	3.03553	14	42815558	42817029	+
1:15038168-15051848+	4.85281	7.49177	0.337376	0.804102	up	7	0	7.88834	3.03553	1	15038167	15051848	+
4:104637923-104638612+	4.85281	7.49177	0.337376	0.804102	up	7	0	7.88834	3.03553	4	104637922	104638612	+
8:56998394-57015154+	4.85281	7.49177	0.337376	0.804102	up	7	0	7.88834	3.03553	8	56998393	57015154	+
5:19169711-19170079+	4.85281	7.49177	0.337376	0.804102	up	7	0	7.88834	3.03553	5	19169710	19170079	+
12:41534190-41540832-	4.85281	7.49177	0.337376	0.804102	up	7	0	7.88834	3.03553	12	41534189	41540832	-
1:65486463-65489220-	4.85281	7.49177	0.337376	0.804102	up	7	0	7.88834	3.03553	1	65486462	65489220	-
7:12411345-12411594-	4.85281	7.49177	0.337376	0.804102	up	7	0	7.88834	3.03553	7	12411344	12411594	-
7:43490362-43519072-	4.85281	7.49177	0.337376	0.804102	up	7	0	7.88834	3.03553	7	43490361	43519072	-
1:39927213-39970501+	4.85281	7.49177	0.337376	0.804102	up	7	0	7.88834	3.03553	1	39927212	39970501	+
8:10016506-10076482-	4.85281	7.49177	0.337376	0.804102	up	7	0	7.88834	3.03553	8	10016505	10076482	-
26:14961692-14967170+	4.85281	7.49177	0.337376	0.804102	up	7	0	7.88834	3.03553	26	14961691	14967170	+
X:37783217-37784418+	4.85281	7.49177	0.337376	0.804102	up	7	0	7.88834	3.03553	X	37783216	37784418	+
8:19196540-19206384+	4.85281	7.49177	0.337376	0.804102	up	7	0	7.88834	3.03553	8	19196539	19206384	+
14:60658581-60659008-	4.85281	7.49177	0.337376	0.804102	up	7	0	7.88834	3.03553	14	60658580	60659008	-
11:60214453-60222355+	4.85281	7.49177	0.337376	0.804102	up	7	0	7.88834	3.03553	11	60214452	60222355	+
1:15414158-15457414-	4.85281	7.49177	0.337376	0.804102	up	7	0	7.88834	3.03553	1	15414157	15457414	-
3:95478530-95510153+	4.85281	7.49177	0.337376	0.804102	up	7	0	7.88834	3.03553	3	95478529	95510153	+
10:18582168-18592370-	4.85281	7.49177	0.337376	0.804102	up	7	0	7.88834	3.03553	10	18582167	18592370	-
3:46719997-46725363+	4.85281	7.49177	0.337376	0.804102	up	7	0	7.88834	3.03553	3	46719996	46725363	+
7:89160639-89214238-	4.85281	7.49177	0.337376	0.804102	up	7	0	7.88834	3.03553	7	89160638	89214238	-
1:188186151-188204759-	4.85281	7.49177	0.337376	0.804102	up	7	0	7.88834	3.03553	1	188186150	188204759	-
20:38759065-38761716-	4.85281	7.49177	0.337376	0.804102	up	7	0	7.88834	3.03553	20	38759064	38761716	-
23:58208179-58223449+	4.85281	7.49177	0.337376	0.804102	up	7	0	7.88834	3.03553	23	58208178	58223449	+
16:2319725-2323479+	4.85281	7.49177	0.337376	0.804102	up	7	0	7.88834	3.03553	16	2319724	2323479	+
3:90577359-90602776-	4.85281	7.49177	0.337376	0.804102	up	7	0	7.88834	3.03553	3	90577358	90602776	-
2:237875203-237887186-	4.85281	7.49177	0.337376	0.804102	up	7	0	7.88834	3.03553	2	237875202	237887186	-
3:140398418-140401971-	4.65917	10.0081	0.185995	0.804102	up	57	2	10.8694	6.21024	3	140398417	140401971	-
19:48119069-48119849+	4.63872	7.35447	0.371943	0.804102	up	6	0	7.67425	3.03553	19	48119068	48119849	+
3:75941177-75943214-	4.63872	7.35447	0.371943	0.804102	up	6	0	7.67425	3.03553	3	75941176	75943214	-
2:242687701-242694824-	4.63872	7.35447	0.371943	0.804102	up	6	0	7.67425	3.03553	2	242687700	242694824	-
17:6802904-6819068+	4.63872	7.35447	0.371943	0.804102	up	6	0	7.67425	3.03553	17	6802903	6819068	+
21:40263887-40264889-	4.63872	7.35447	0.371943	0.804102	up	6	0	7.67425	3.03553	21	40263886	40264889	-
18:9740679-9742130+	4.63872	7.35447	0.371943	0.804102	up	6	0	7.67425	3.03553	18	9740678	9742130	+
1:58061636-58062704-	4.63872	7.35447	0.371943	0.804102	up	6	0	7.67425	3.03553	1	58061635	58062704	-
1:235552482-235552758+	4.63872	7.35447	0.371943	0.804102	up	6	0	7.67425	3.03553	1	235552481	235552758	+
7:19638556-19640555+	4.63872	7.35447	0.371943	0.804102	up	6	0	7.67425	3.03553	7	19638555	19640555	+
16:7733874-7735910-	4.63872	7.35447	0.371943	0.804102	up	6	0	7.67425	3.03553	16	7733873	7735910	-
11:10689705-10690585+	4.63872	7.35447	0.371943	0.804102	up	6	0	7.67425	3.03553	11	10689704	10690585	+
10:11489284-11496390-	4.63872	7.35447	0.371943	0.804102	up	6	0	7.67425	3.03553	10	11489283	11496390	-
6:90449682-90456180-	4.63872	7.35447	0.371943	0.804102	up	6	0	7.67425	3.03553	6	90449681	90456180	-
4:71126354-71130447+	4.63872	7.35447	0.371943	0.804102	up	6	0	7.67425	3.03553	4	71126353	71130447	+
8:72567947-72615177+	4.63872	7.35447	0.371943	0.804102	up	6	0	7.67425	3.03553	8	72567946	72615177	+
3:33353522-33359178+	4.63872	7.35447	0.371943	0.804102	up	6	0	7.67425	3.03553	3	33353521	33359178	+
14:23443510-23477769+	4.63872	7.35447	0.371943	0.804102	up	6	0	7.67425	3.03553	14	23443509	23477769	+
6:4767982-4846648+	4.63872	7.35447	0.371943	0.804102	up	6	0	7.67425	3.03553	6	4767981	4846648	+
15:64503784-64504320-	4.63872	7.35447	0.371943	0.804102	up	6	0	7.67425	3.03553	15	64503783	64504320	-
7:43490362-43498759-	4.63872	7.35447	0.371943	0.804102	up	6	0	7.67425	3.03553	7	43490361	43498759	-
16:31189804-31205128-	4.63872	7.35447	0.371943	0.804102	up	6	0	7.67425	3.03553	16	31189803	31205128	-
1:15441209-15457414-	4.63872	7.35447	0.371943	0.804102	up	6	0	7.67425	3.03553	1	15441208	15457414	-
1:257002163-257013137-	4.63872	7.35447	0.371943	0.804102	up	6	0	7.67425	3.03553	1	257002162	257013137	-
2:110869846-110886628-	4.63872	7.35447	0.371943	0.804102	up	6	0	7.67425	3.03553	2	110869845	110886628	-
3:91321494-91326485-	4.63872	7.35447	0.371943	0.804102	up	6	0	7.67425	3.03553	3	91321493	91326485	-
13:1093247-1121560+	4.63872	7.35447	0.371943	0.804102	up	6	0	7.67425	3.03553	13	1093246	1121560	+
6:36523510-36548578+	4.63872	7.35447	0.371943	0.804102	up	6	0	7.67425	3.03553	6	36523509	36548578	+
11:47412561-47425001-	4.63872	7.35447	0.371943	0.804102	up	6	0	7.67425	3.03553	11	47412560	47425001	-
1:26641545-26679504-	4.63872	7.35447	0.371943	0.804102	up	6	0	7.67425	3.03553	1	26641544	26679504	-
1:4903036-4909753-	4.63872	7.35447	0.371943	0.804102	up	6	0	7.67425	3.03553	1	4903035	4909753	-
2:207174170-207183665-	4.63872	7.35447	0.371943	0.804102	up	6	0	7.67425	3.03553	2	207174169	207183665	-
7:49750313-49750868+	4.63872	7.35447	0.371943	0.804102	up	6	0	7.67425	3.03553	7	49750312	49750868	+
1:13772303-13772786-	4.63872	7.35447	0.371943	0.804102	up	6	0	7.67425	3.03553	1	13772302	13772786	-
16:26240393-26271164-	4.63872	7.35447	0.371943	0.804102	up	6	0	7.67425	3.03553	16	26240392	26271164	-
X:81653742-81679464+	4.63872	7.35447	0.371943	0.804102	up	6	0	7.67425	3.03553	X	81653741	81679464	+
5:57318650-57327178+	4.63872	7.35447	0.371943	0.804102	up	6	0	7.67425	3.03553	5	57318649	57327178	+
2:39937336-39969908+	4.63872	7.35447	0.371943	0.804102	up	6	0	7.67425	3.03553	2	39937335	39969908	+
2:244759301-244772359+	4.63872	7.35447	0.371943	0.804102	up	6	0	7.67425	3.03553	2	244759300	244772359	+
19:30416248-30503234+	4.63872	7.35447	0.371943	0.804102	up	6	0	7.67425	3.03553	19	30416247	30503234	+
X:77447950-77450529+	4.63872	7.35447	0.371943	0.804102	up	6	0	7.67425	3.03553	X	77447949	77450529	+
3:150487617-150493798-	4.63872	7.35447	0.371943	0.804102	up	6	0	7.67425	3.03553	3	150487616	150493798	-
3:39697354-39705937-	4.63872	7.35447	0.371943	0.804102	up	6	0	7.67425	3.03553	3	39697353	39705937	-
3:20439928-20441347+	4.63872	7.35447	0.371943	0.804102	up	6	0	7.67425	3.03553	3	20439927	20441347	+
18:10855380-10860991-	4.63872	7.35447	0.371943	0.804102	up	6	0	7.67425	3.03553	18	10855379	10860991	-
1:118305521-118360480+	4.63872	7.35447	0.371943	0.804102	up	6	0	7.67425	3.03553	1	118305520	118360480	+
16:31170194-31170879-	4.63872	7.35447	0.371943	0.804102	up	6	0	7.67425	3.03553	16	31170193	31170879	-
19:10493136-10495550+	4.63872	7.35447	0.371943	0.804102	up	6	0	7.67425	3.03553	19	10493135	10495550	+
9:68893430-68919893+	4.63872	7.35447	0.371943	0.804102	up	6	0	7.67425	3.03553	9	68893429	68919893	+
25:14209596-14214854+	4.63872	7.35447	0.371943	0.804102	up	6	0	7.67425	3.03553	25	14209595	14214854	+
6:19093795-19100583+	4.63872	7.35447	0.371943	0.804102	up	6	0	7.67425	3.03553	6	19093794	19100583	+
13:27363589-27364579+	4.63872	7.35447	0.371943	0.804102	up	6	0	7.67425	3.03553	13	27363588	27364579	+
8:16906704-16909460+	4.63872	7.35447	0.371943	0.804102	up	6	0	7.67425	3.03553	8	16906703	16909460	+
9:76907921-76937402+	4.63872	7.35447	0.371943	0.804102	up	6	0	7.67425	3.03553	9	76907920	76937402	+
1:201695023-201698776-	4.63872	7.35447	0.371943	0.804102	up	6	0	7.67425	3.03553	1	201695022	201698776	-
X:125755498-125798901-	4.63872	7.35447	0.371943	0.804102	up	6	0	7.67425	3.03553	X	125755497	125798901	-
19:791601-792250-	4.63872	7.35447	0.371943	0.804102	up	6	0	7.67425	3.03553	19	791600	792250	-
X:89514193-89514375-	4.63872	7.35447	0.371943	0.804102	up	6	0	7.67425	3.03553	X	89514192	89514375	-
17:9946520-10046342-	4.63872	7.35447	0.371943	0.804102	up	6	0	7.67425	3.03553	17	9946519	10046342	-
19:32356673-32358592+	4.63872	7.35447	0.371943	0.804102	up	6	0	7.67425	3.03553	19	32356672	32358592	+
13:15292761-15296784-	4.63872	7.35447	0.371943	0.804102	up	6	0	7.67425	3.03553	13	15292760	15296784	-
22:38964285-38970147+	4.63872	7.35447	0.371943	0.804102	up	6	0	7.67425	3.03553	22	38964284	38970147	+
3:10097559-10127251-	4.63872	7.35447	0.371943	0.804102	up	6	0	7.67425	3.03553	3	10097558	10127251	-
12:74478570-74486441+	4.63872	7.35447	0.371943	0.804102	up	6	0	7.67425	3.03553	12	74478569	74486441	+
X:122733248-122745111+	4.63872	7.35447	0.371943	0.804102	up	6	0	7.67425	3.03553	X	122733247	122745111	+
4:9532970-9562740+	4.63872	7.35447	0.371943	0.804102	up	6	0	7.67425	3.03553	4	9532969	9562740	+
11:18260902-18261453-	4.63872	7.35447	0.371943	0.804102	up	6	0	7.67425	3.03553	11	18260901	18261453	-
10:15962781-15976873+	4.63872	7.35447	0.371943	0.804102	up	6	0	7.67425	3.03553	10	15962780	15976873	+
9:22893985-22929129+	4.63872	7.35447	0.371943	0.804102	up	6	0	7.67425	3.03553	9	22893984	22929129	+
15:13905952-13907031+	4.63872	7.35447	0.371943	0.804102	up	6	0	7.67425	3.03553	15	13905951	13907031	+
23:41768782-41779424+	4.63872	7.35447	0.371943	0.804102	up	6	0	7.67425	3.03553	23	41768781	41779424	+
3:132293475-132293656+	4.63872	7.35447	0.371943	0.804102	up	6	0	7.67425	3.03553	3	132293474	132293656	+
12:39498591-39502701-	4.63872	7.35447	0.371943	0.804102	up	6	0	7.67425	3.03553	12	39498590	39502701	-
20:17197089-17208513+	4.63872	7.35447	0.371943	0.804102	up	6	0	7.67425	3.03553	20	17197088	17208513	+
1:163204563-163209534-	4.63872	7.35447	0.371943	0.804102	up	6	0	7.67425	3.03553	1	163204562	163209534	-
1:161597856-161618999-	4.63872	7.35447	0.371943	0.804102	up	6	0	7.67425	3.03553	1	161597855	161618999	-
15:42196391-42197947+	4.63872	7.35447	0.371943	0.804102	up	6	0	7.67425	3.03553	15	42196390	42197947	+
1:27169247-27193546+	4.63872	7.35447	0.371943	0.804102	up	6	0	7.67425	3.03553	1	27169246	27193546	+
16:36972819-36976331+	4.63872	7.35447	0.371943	0.804102	up	6	0	7.67425	3.03553	16	36972818	36976331	+
20:7572289-7572481-	4.63872	7.35447	0.371943	0.804102	up	6	0	7.67425	3.03553	20	7572288	7572481	-
2:149104239-149145503+	4.63872	7.35447	0.371943	0.804102	up	6	0	7.67425	3.03553	2	149104238	149145503	+
3:201771447-201774332+	4.63872	7.35447	0.371943	0.804102	up	6	0	7.67425	3.03553	3	201771446	201774332	+
7:79544132-79596738+	4.63872	7.35447	0.371943	0.804102	up	6	0	7.67425	3.03553	7	79544131	79596738	+
6:116011495-116035001-	4.63872	7.35447	0.371943	0.804102	up	6	0	7.67425	3.03553	6	116011494	116035001	-
8:81163879-81165914+	4.63872	7.35447	0.371943	0.804102	up	6	0	7.67425	3.03553	8	81163878	81165914	+
1:109500073-109500676-	4.63872	7.35447	0.371943	0.804102	up	6	0	7.67425	3.03553	1	109500072	109500676	-
24:25664914-25673453-	4.63872	7.35447	0.371943	0.804102	up	6	0	7.67425	3.03553	24	25664913	25673453	-
7:73278682-73279691+	4.63872	7.35447	0.371943	0.804102	up	6	0	7.67425	3.03553	7	73278681	73279691	+
14:21255727-21255973-	4.63872	7.35447	0.371943	0.804102	up	6	0	7.67425	3.03553	14	21255726	21255973	-
25:41082915-41116146+	4.63872	7.35447	0.371943	0.804102	up	6	0	7.67425	3.03553	25	41082914	41116146	+
23:34729630-34729964-	4.63872	7.35447	0.371943	0.804102	up	6	0	7.67425	3.03553	23	34729629	34729964	-
5:9169458-9172590-	4.63872	7.35447	0.371943	0.804102	up	6	0	7.67425	3.03553	5	9169457	9172590	-
7:66590541-66591494-	4.63872	7.35447	0.371943	0.804102	up	6	0	7.67425	3.03553	7	66590540	66591494	-
10:84690043-84690284-	4.63872	7.35447	0.371943	0.804102	up	6	0	7.67425	3.03553	10	84690042	84690284	-
6:50062332-50082972+	4.63872	7.35447	0.371943	0.804102	up	6	0	7.67425	3.03553	6	50062331	50082972	+
21:16880780-16893825+	4.63872	7.35447	0.371943	0.804102	up	6	0	7.67425	3.03553	21	16880779	16893825	+
24:38587926-38594394+	4.63872	7.35447	0.371943	0.804102	up	6	0	7.67425	3.03553	24	38587925	38594394	+
23:2352193-2353666-	4.63872	7.35447	0.371943	0.804102	up	6	0	7.67425	3.03553	23	2352192	2353666	-
15:43162201-43164992+	4.63872	7.35447	0.371943	0.804102	up	6	0	7.67425	3.03553	15	43162200	43164992	+
2:201812234-201818916+	4.63872	7.35447	0.371943	0.804102	up	6	0	7.67425	3.03553	2	201812233	201818916	+
9:32453169-32456027-	4.63872	7.35447	0.371943	0.804102	up	6	0	7.67425	3.03553	9	32453168	32456027	-
8:82896688-82896879+	4.63872	7.35447	0.371943	0.804102	up	6	0	7.67425	3.03553	8	82896687	82896879	+
10:29910092-29916863-	4.63872	7.35447	0.371943	0.804102	up	6	0	7.67425	3.03553	10	29910091	29916863	-
1:240054936-240061340+	4.63872	7.35447	0.371943	0.804102	up	6	0	7.67425	3.03553	1	240054935	240061340	+
20:19455408-19457119-	4.63872	7.35447	0.371943	0.804102	up	6	0	7.67425	3.03553	20	19455407	19457119	-
1:37529468-37569871-	4.63872	7.35447	0.371943	0.804102	up	6	0	7.67425	3.03553	1	37529467	37569871	-
7:18629749-18645427-	4.63872	7.35447	0.371943	0.804102	up	6	0	7.67425	3.03553	7	18629748	18645427	-
13:32298293-32298903+	4.63872	7.35447	0.371943	0.804102	up	6	0	7.67425	3.03553	13	32298292	32298903	+
15:31642818-31658656+	4.63872	7.35447	0.371943	0.804102	up	6	0	7.67425	3.03553	15	31642817	31658656	+
4:53786359-53796966-	4.63872	7.35447	0.371943	0.804102	up	6	0	7.67425	3.03553	4	53786358	53796966	-
3:58424298-58440434+	4.63872	7.35447	0.371943	0.804102	up	6	0	7.67425	3.03553	3	58424297	58440434	+
1:122562436-122565177+	4.63872	7.35447	0.371943	0.804102	up	6	0	7.67425	3.03553	1	122562435	122565177	+
1:90140379-90165533-	4.63872	7.35447	0.371943	0.804102	up	6	0	7.67425	3.03553	1	90140378	90165533	-
18:59927855-59931582-	4.63872	7.35447	0.371943	0.804102	up	6	0	7.67425	3.03553	18	59927854	59931582	-
15:5793951-5823504+	4.63872	7.35447	0.371943	0.804102	up	6	0	7.67425	3.03553	15	5793950	5823504	+
7:35100540-35134381-	4.63872	7.35447	0.371943	0.804102	up	6	0	7.67425	3.03553	7	35100539	35134381	-
8:81760959-81768194+	4.63872	7.35447	0.371943	0.804102	up	6	0	7.67425	3.03553	8	81760958	81768194	+
1:2900559-2905495+	4.63872	7.35447	0.371943	0.804102	up	6	0	7.67425	3.03553	1	2900558	2905495	+
11:51372746-51378528-	4.63872	7.35447	0.371943	0.804102	up	6	0	7.67425	3.03553	11	51372745	51378528	-
8:30933016-30933294+	4.63872	7.35447	0.371943	0.804102	up	6	0	7.67425	3.03553	8	30933015	30933294	+
1:168756041-168768245-	4.63872	7.35447	0.371943	0.804102	up	6	0	7.67425	3.03553	1	168756040	168768245	-
2:112593052-112594934-	4.63872	7.35447	0.371943	0.804102	up	6	0	7.67425	3.03553	2	112593051	112594934	-
23:46760440-46772678-	4.63872	7.35447	0.371943	0.804102	up	6	0	7.67425	3.03553	23	46760439	46772678	-
1:215246115-215294653+	4.63872	7.35447	0.371943	0.804102	up	6	0	7.67425	3.03553	1	215246114	215294653	+
X:1625980-1637862-	4.63872	7.35447	0.371943	0.804102	up	6	0	7.67425	3.03553	X	1625979	1637862	-
14:10153389-10154256+	4.63872	7.35447	0.371943	0.804102	up	6	0	7.67425	3.03553	14	10153388	10154256	+
7:43486507-43489975-	4.63872	7.35447	0.371943	0.804102	up	6	0	7.67425	3.03553	7	43486506	43489975	-
4:63672771-63694790-	4.63872	7.35447	0.371943	0.804102	up	6	0	7.67425	3.03553	4	63672770	63694790	-
3:187269203-187297437-	4.63872	7.35447	0.371943	0.804102	up	6	0	7.67425	3.03553	3	187269202	187297437	-
4:49033264-49033452-	4.63872	7.35447	0.371943	0.804102	up	6	0	7.67425	3.03553	4	49033263	49033452	-
8:37948146-37965977+	4.63872	7.35447	0.371943	0.804102	up	6	0	7.67425	3.03553	8	37948145	37965977	+
22:10714656-10716109-	4.63872	7.35447	0.371943	0.804102	up	6	0	7.67425	3.03553	22	10714655	10716109	-
5:58819473-58823067+	4.63872	7.35447	0.371943	0.804102	up	6	0	7.67425	3.03553	5	58819472	58823067	+
3:220631047-220632274-	4.63872	7.35447	0.371943	0.804102	up	6	0	7.67425	3.03553	3	220631046	220632274	-
9:93740542-93742389-	4.63872	7.35447	0.371943	0.804102	up	6	0	7.67425	3.03553	9	93740541	93742389	-
3:179542252-179544464-	4.63872	7.35447	0.371943	0.804102	up	6	0	7.67425	3.03553	3	179542251	179544464	-
7:46768182-46786272+	4.63872	7.35447	0.371943	0.804102	up	6	0	7.67425	3.03553	7	46768181	46786272	+
1:272079589-272140652+	4.63872	7.35447	0.371943	0.804102	up	6	0	7.67425	3.03553	1	272079588	272140652	+
17:69325795-69326104+	4.63872	7.35447	0.371943	0.804102	up	6	0	7.67425	3.03553	17	69325794	69326104	+
18:44715577-44764871-	4.63872	7.35447	0.371943	0.804102	up	6	0	7.67425	3.03553	18	44715576	44764871	-
12:53604897-53676565+	4.63872	7.35447	0.371943	0.804102	up	6	0	7.67425	3.03553	12	53604896	53676565	+
7:43274346-43275301+	4.63872	7.35447	0.371943	0.804102	up	6	0	7.67425	3.03553	7	43274345	43275301	+
12:41445694-41473937-	4.63872	7.35447	0.371943	0.804102	up	6	0	7.67425	3.03553	12	41445693	41473937	-
9:46361048-46367632-	4.63872	7.35447	0.371943	0.804102	up	6	0	7.67425	3.03553	9	46361047	46367632	-
1:174378847-174379308+	4.63872	7.35447	0.371943	0.804102	up	6	0	7.67425	3.03553	1	174378846	174379308	+
2:230903735-230909226-	4.63872	7.35447	0.371943	0.804102	up	6	0	7.67425	3.03553	2	230903734	230909226	-
5:93736412-93773106+	4.63872	7.35447	0.371943	0.804102	up	6	0	7.67425	3.03553	5	93736411	93773106	+
10:35943183-35944366+	4.63872	7.35447	0.371943	0.804102	up	6	0	7.67425	3.03553	10	35943182	35944366	+
22:9285077-9285943+	4.63872	7.35447	0.371943	0.804102	up	6	0	7.67425	3.03553	22	9285076	9285943	+
23:37332237-37338400+	4.63872	7.35447	0.371943	0.804102	up	6	0	7.67425	3.03553	23	37332236	37338400	+
9:42879578-42886624+	4.63872	7.35447	0.371943	0.804102	up	6	0	7.67425	3.03553	9	42879577	42886624	+
2:207100440-207108125-	4.63872	7.35447	0.371943	0.804102	up	6	0	7.67425	3.03553	2	207100439	207108125	-
1:62854791-62856975-	4.63872	7.35447	0.371943	0.804102	up	6	0	7.67425	3.03553	1	62854790	62856975	-
10:11975780-11978540+	4.63872	7.35447	0.371943	0.804102	up	6	0	7.67425	3.03553	10	11975779	11978540	+
3:145354842-145358466-	4.63872	7.35447	0.371943	0.804102	up	6	0	7.67425	3.03553	3	145354841	145358466	-
11:50067706-50082001-	4.63872	7.35447	0.371943	0.804102	up	6	0	7.67425	3.03553	11	50067705	50082001	-
16:22080188-22087803+	4.63872	7.35447	0.371943	0.804102	up	6	0	7.67425	3.03553	16	22080187	22087803	+
1:128902054-128907678-	4.63872	7.35447	0.371943	0.804102	up	6	0	7.67425	3.03553	1	128902053	128907678	-
16:33628263-33641334+	4.63872	7.35447	0.371943	0.804102	up	6	0	7.67425	3.03553	16	33628262	33641334	+
14:60832331-60832726-	4.63872	7.35447	0.371943	0.804102	up	6	0	7.67425	3.03553	14	60832330	60832726	-
13:33665648-33667957+	4.63872	7.35447	0.371943	0.804102	up	6	0	7.67425	3.03553	13	33665647	33667957	+
3:76551166-76553285+	4.63872	7.35447	0.371943	0.804102	up	6	0	7.67425	3.03553	3	76551165	76553285	+
2:12060186-12060586+	4.63872	7.35447	0.371943	0.804102	up	6	0	7.67425	3.03553	2	12060185	12060586	+
5:58998238-58998652-	4.63872	7.35447	0.371943	0.804102	up	6	0	7.67425	3.03553	5	58998237	58998652	-
20:31673053-31679850+	4.63872	7.35447	0.371943	0.804102	up	6	0	7.67425	3.03553	20	31673052	31679850	+
X:102389400-102393721+	4.63872	7.35447	0.371943	0.804102	up	6	0	7.67425	3.03553	X	102389399	102393721	+
15:7462042-7502717+	4.63872	7.35447	0.371943	0.804102	up	6	0	7.67425	3.03553	15	7462041	7502717	+
3:59126949-59128217-	4.63872	7.35447	0.371943	0.804102	up	6	0	7.67425	3.03553	3	59126948	59128217	-
14:60838714-60840094-	4.63872	7.35447	0.371943	0.804102	up	6	0	7.67425	3.03553	14	60838713	60840094	-
2:137555464-137562419+	4.63872	7.35447	0.371943	0.804102	up	6	0	7.67425	3.03553	2	137555463	137562419	+
22:15869101-15937706-	4.63872	7.35447	0.371943	0.804102	up	6	0	7.67425	3.03553	22	15869100	15937706	-
13:39738801-39741601+	4.63872	7.35447	0.371943	0.804102	up	6	0	7.67425	3.03553	13	39738800	39741601	+
1:188519955-188535534-	4.63872	7.35447	0.371943	0.804102	up	6	0	7.67425	3.03553	1	188519954	188535534	-
19:31759619-31761449+	4.63872	7.35447	0.371943	0.804102	up	6	0	7.67425	3.03553	19	31759618	31761449	+
6:4786345-4796962+	4.63872	7.35447	0.371943	0.804102	up	6	0	7.67425	3.03553	6	4786344	4796962	+
8:61404006-61404532-	4.63872	7.35447	0.371943	0.804102	up	6	0	7.67425	3.03553	8	61404005	61404532	-
3:163486200-163486585+	4.63872	7.35447	0.371943	0.804102	up	6	0	7.67425	3.03553	3	163486199	163486585	+
5:35235675-35256626-	4.63872	7.35447	0.371943	0.804102	up	6	0	7.67425	3.03553	5	35235674	35256626	-
2:118408658-118425288-	4.63872	7.35447	0.371943	0.804102	up	6	0	7.67425	3.03553	2	118408657	118425288	-
1:205557188-205560151-	4.63872	7.35447	0.371943	0.804102	up	6	0	7.67425	3.03553	1	205557187	205560151	-
12:922516-939432+	4.63872	7.35447	0.371943	0.804102	up	6	0	7.67425	3.03553	12	922515	939432	+
9:47094455-47108260-	4.63872	7.35447	0.371943	0.804102	up	6	0	7.67425	3.03553	9	47094454	47108260	-
9:94124071-94149124+	4.63872	7.35447	0.371943	0.804102	up	6	0	7.67425	3.03553	9	94124070	94149124	+
2:137525988-137555561+	4.63872	7.35447	0.371943	0.804102	up	6	0	7.67425	3.03553	2	137525987	137555561	+
X:125304484-125306740-	4.63872	7.35447	0.371943	0.804102	up	6	0	7.67425	3.03553	X	125304483	125306740	-
12:69357790-69364005-	4.63872	7.35447	0.371943	0.804102	up	6	0	7.67425	3.03553	12	69357789	69364005	-
7:81537797-81560091+	4.63872	7.35447	0.371943	0.804102	up	6	0	7.67425	3.03553	7	81537796	81560091	+
5:93473877-93482729+	4.63872	7.35447	0.371943	0.804102	up	6	0	7.67425	3.03553	5	93473876	93482729	+
5:17546534-17553298+	4.63872	7.35447	0.371943	0.804102	up	6	0	7.67425	3.03553	5	17546533	17553298	+
7:44021196-44021392-	4.63872	7.35447	0.371943	0.804102	up	6	0	7.67425	3.03553	7	44021195	44021392	-
5:91627113-91682483-	4.63872	7.35447	0.371943	0.804102	up	6	0	7.67425	3.03553	5	91627112	91682483	-
25:15392210-15405305-	4.63872	7.35447	0.371943	0.804102	up	6	0	7.67425	3.03553	25	15392209	15405305	-
2:71096451-71179918-	4.63872	7.35447	0.371943	0.804102	up	6	0	7.67425	3.03553	2	71096450	71179918	-
18:60351289-60363401+	4.38722	7.20271	0.416756	0.804102	up	5	0	7.42275	3.03553	18	60351288	60363401	+
13:22710053-22710588-	4.38722	7.20271	0.416756	0.804102	up	5	0	7.42275	3.03553	13	22710052	22710588	-
7:99864334-99867441-	4.38722	7.20271	0.416756	0.804102	up	5	0	7.42275	3.03553	7	99864333	99867441	-
2:174625283-174645932-	4.38722	7.20271	0.416756	0.804102	up	5	0	7.42275	3.03553	2	174625282	174645932	-
20:29400782-29406240-	4.38722	7.20271	0.416756	0.804102	up	5	0	7.42275	3.03553	20	29400781	29406240	-
13:17349775-17365149+	4.38722	7.20271	0.416756	0.804102	up	5	0	7.42275	3.03553	13	17349774	17365149	+
3:149697663-149702270-	4.38722	7.20271	0.416756	0.804102	up	5	0	7.42275	3.03553	3	149697662	149702270	-
18:55449234-55453350-	4.38722	7.20271	0.416756	0.804102	up	5	0	7.42275	3.03553	18	55449233	55453350	-
1:68211204-68213925-	4.38722	7.20271	0.416756	0.804102	up	5	0	7.42275	3.03553	1	68211203	68213925	-
3:215603961-215611423+	4.38722	7.20271	0.416756	0.804102	up	5	0	7.42275	3.03553	3	215603960	215611423	+
4:99215849-99223595+	4.38722	7.20271	0.416756	0.804102	up	5	0	7.42275	3.03553	4	99215848	99223595	+
1:76546330-76554359+	4.38722	7.20271	0.416756	0.804102	up	5	0	7.42275	3.03553	1	76546329	76554359	+
7:45128759-45135571+	4.38722	7.20271	0.416756	0.804102	up	5	0	7.42275	3.03553	7	45128758	45135571	+
15:72493735-72512602+	4.38722	7.20271	0.416756	0.804102	up	5	0	7.42275	3.03553	15	72493734	72512602	+
6:83135087-83177711-	4.38722	7.20271	0.416756	0.804102	up	5	0	7.42275	3.03553	6	83135086	83177711	-
19:56329848-56363028+	4.38722	7.20271	0.416756	0.804102	up	5	0	7.42275	3.03553	19	56329847	56363028	+
7:73559289-73560624-	4.38722	7.20271	0.416756	0.804102	up	5	0	7.42275	3.03553	7	73559288	73560624	-
5:78171872-78173099+	4.38722	7.20271	0.416756	0.804102	up	5	0	7.42275	3.03553	5	78171871	78173099	+
21:8987224-9016806+	4.38722	7.20271	0.416756	0.804102	up	5	0	7.42275	3.03553	21	8987223	9016806	+
18:22520417-22532902-	4.38722	7.20271	0.416756	0.804102	up	5	0	7.42275	3.03553	18	22520416	22532902	-
1:36193362-36276985+	4.38722	7.20271	0.416756	0.804102	up	5	0	7.42275	3.03553	1	36193361	36276985	+
17:12163803-12170324+	4.38722	7.20271	0.416756	0.804102	up	5	0	7.42275	3.03553	17	12163802	12170324	+
15:42992446-42998654+	4.38722	7.20271	0.416756	0.804102	up	5	0	7.42275	3.03553	15	42992445	42998654	+
7:40256102-40290277-	4.38722	7.20271	0.416756	0.804102	up	5	0	7.42275	3.03553	7	40256101	40290277	-
3:188277259-188307553+	4.38722	7.20271	0.416756	0.804102	up	5	0	7.42275	3.03553	3	188277258	188307553	+
12:55343202-55347754-	4.38722	7.20271	0.416756	0.804102	up	5	0	7.42275	3.03553	12	55343201	55347754	-
1:54482409-54482917+	4.38722	7.20271	0.416756	0.804102	up	5	0	7.42275	3.03553	1	54482408	54482917	+
4:49032573-49035333-	4.38722	7.20271	0.416756	0.804102	up	5	0	7.42275	3.03553	4	49032572	49035333	-
13:16308596-16313582+	4.38722	7.20271	0.416756	0.804102	up	5	0	7.42275	3.03553	13	16308595	16313582	+
3:134068794-134069216+	4.38722	7.20271	0.416756	0.804102	up	5	0	7.42275	3.03553	3	134068793	134069216	+
18:66945350-66975896+	4.38722	7.20271	0.416756	0.804102	up	5	0	7.42275	3.03553	18	66945349	66975896	+
18:40636173-40664048+	4.38722	7.20271	0.416756	0.804102	up	5	0	7.42275	3.03553	18	40636172	40664048	+
10:28638253-28651716-	4.38722	7.20271	0.416756	0.804102	up	5	0	7.42275	3.03553	10	28638252	28651716	-
21:40270420-40270587-	4.38722	7.20271	0.416756	0.804102	up	5	0	7.42275	3.03553	21	40270419	40270587	-
1:57889461-57973606+	4.38722	7.20271	0.416756	0.804102	up	5	0	7.42275	3.03553	1	57889460	57973606	+
9:77402159-77407790-	4.38722	7.20271	0.416756	0.804102	up	5	0	7.42275	3.03553	9	77402158	77407790	-
20:3174401-3180424-	4.38722	7.20271	0.416756	0.804102	up	5	0	7.42275	3.03553	20	3174400	3180424	-
X:89514211-89514375-	4.38722	7.20271	0.416756	0.804102	up	5	0	7.42275	3.03553	X	89514210	89514375	-
4:43395316-43406758-	4.38722	7.20271	0.416756	0.804102	up	5	0	7.42275	3.03553	4	43395315	43406758	-
1:118579190-118580119+	4.38722	7.20271	0.416756	0.804102	up	5	0	7.42275	3.03553	1	118579189	118580119	+
21:40274969-40275196-	4.38722	7.20271	0.416756	0.804102	up	5	0	7.42275	3.03553	21	40274968	40275196	-
16:23823644-23828070-	4.38722	7.20271	0.416756	0.804102	up	5	0	7.42275	3.03553	16	23823643	23828070	-
1:60316785-60329705-	4.38722	7.20271	0.416756	0.804102	up	5	0	7.42275	3.03553	1	60316784	60329705	-
6:67163290-67166427-	4.38722	7.20271	0.416756	0.804102	up	5	0	7.42275	3.03553	6	67163289	67166427	-
16:41340062-41343281+	4.38722	7.20271	0.416756	0.804102	up	5	0	7.42275	3.03553	16	41340061	41343281	+
2:244599984-244608081+	4.38722	7.20271	0.416756	0.804102	up	5	0	7.42275	3.03553	2	244599983	244608081	+
1:188922008-188922994-	4.38722	7.20271	0.416756	0.804102	up	5	0	7.42275	3.03553	1	188922007	188922994	-
15:14758742-14759064+	4.38722	7.20271	0.416756	0.804102	up	5	0	7.42275	3.03553	15	14758741	14759064	+
3:190993536-191050457+	4.38722	7.20271	0.416756	0.804102	up	5	0	7.42275	3.03553	3	190993535	191050457	+
1:75199079-75216864+	4.38722	7.20271	0.416756	0.804102	up	5	0	7.42275	3.03553	1	75199078	75216864	+
25:9533854-9556735+	4.38722	7.20271	0.416756	0.804102	up	5	0	7.42275	3.03553	25	9533853	9556735	+
17:44007106-44012265+	4.38722	7.20271	0.416756	0.804102	up	5	0	7.42275	3.03553	17	44007105	44012265	+
11:60335291-60341799+	4.38722	7.20271	0.416756	0.804102	up	5	0	7.42275	3.03553	11	60335290	60341799	+
14:44065656-44065988-	4.38722	7.20271	0.416756	0.804102	up	5	0	7.42275	3.03553	14	44065655	44065988	-
9:67783216-67800930+	4.38722	7.20271	0.416756	0.804102	up	5	0	7.42275	3.03553	9	67783215	67800930	+
1:225126969-225129724+	4.38722	7.20271	0.416756	0.804102	up	5	0	7.42275	3.03553	1	225126968	225129724	+
14:34137543-34137729+	4.38722	7.20271	0.416756	0.804102	up	5	0	7.42275	3.03553	14	34137542	34137729	+
2:31127443-31128766-	4.38722	7.20271	0.416756	0.804102	up	5	0	7.42275	3.03553	2	31127442	31128766	-
14:48655694-48659035-	4.38722	7.20271	0.416756	0.804102	up	5	0	7.42275	3.03553	14	48655693	48659035	-
16:7801323-7875331-	4.38722	7.20271	0.416756	0.804102	up	5	0	7.42275	3.03553	16	7801322	7875331	-
23:911263-937162-	4.38722	7.20271	0.416756	0.804102	up	5	0	7.42275	3.03553	23	911262	937162	-
X:62834477-62890820-	4.38722	7.20271	0.416756	0.804102	up	5	0	7.42275	3.03553	X	62834476	62890820	-
19:16296095-16296737-	4.38722	7.20271	0.416756	0.804102	up	5	0	7.42275	3.03553	19	16296094	16296737	-
7:57304384-57344075+	4.38722	7.20271	0.416756	0.804102	up	5	0	7.42275	3.03553	7	57304383	57344075	+
7:32392825-32444068-	4.38722	7.20271	0.416756	0.804102	up	5	0	7.42275	3.03553	7	32392824	32444068	-
1:10545723-10546257+	4.38722	7.20271	0.416756	0.804102	up	5	0	7.42275	3.03553	1	10545722	10546257	+
9:32777641-32777847+	4.38722	7.20271	0.416756	0.804102	up	5	0	7.42275	3.03553	9	32777640	32777847	+
3:59123049-59126100-	4.38722	7.20271	0.416756	0.804102	up	5	0	7.42275	3.03553	3	59123048	59126100	-
12:28597925-28617855+	4.38722	7.20271	0.416756	0.804102	up	5	0	7.42275	3.03553	12	28597924	28617855	+
13:45843758-45884274+	4.38722	7.20271	0.416756	0.804102	up	5	0	7.42275	3.03553	13	45843757	45884274	+
3:161550456-161556363+	4.38722	7.20271	0.416756	0.804102	up	5	0	7.42275	3.03553	3	161550455	161556363	+
2:142502421-142512054+	4.38722	7.20271	0.416756	0.804102	up	5	0	7.42275	3.03553	2	142502420	142512054	+
10:46920885-46921128+	4.38722	7.20271	0.416756	0.804102	up	5	0	7.42275	3.03553	10	46920884	46921128	+
4:15544281-15557792+	4.38722	7.20271	0.416756	0.804102	up	5	0	7.42275	3.03553	4	15544280	15557792	+
X:47147314-47151620-	4.38722	7.20271	0.416756	0.804102	up	5	0	7.42275	3.03553	X	47147313	47151620	-
1:171207898-171215486-	4.38722	7.20271	0.416756	0.804102	up	5	0	7.42275	3.03553	1	171207897	171215486	-
4:53429104-53504369-	4.38722	7.20271	0.416756	0.804102	up	5	0	7.42275	3.03553	4	53429103	53504369	-
X:73794241-73805224-	4.38722	7.20271	0.416756	0.804102	up	5	0	7.42275	3.03553	X	73794240	73805224	-
5:91063264-91121943-	4.38722	7.20271	0.416756	0.804102	up	5	0	7.42275	3.03553	5	91063263	91121943	-
20:3197262-3201954-	4.38722	7.20271	0.416756	0.804102	up	5	0	7.42275	3.03553	20	3197261	3201954	-
9:83091266-83104062-	4.38722	7.20271	0.416756	0.804102	up	5	0	7.42275	3.03553	9	83091265	83104062	-
X:89514230-89514430-	4.38722	7.20271	0.416756	0.804102	up	5	0	7.42275	3.03553	X	89514229	89514430	-
3:139947120-139949079+	4.38722	7.20271	0.416756	0.804102	up	5	0	7.42275	3.03553	3	139947119	139949079	+
9:46260763-46261122+	4.38722	7.20271	0.416756	0.804102	up	5	0	7.42275	3.03553	9	46260762	46261122	+
11:12049019-12055563+	4.38722	7.20271	0.416756	0.804102	up	5	0	7.42275	3.03553	11	12049018	12055563	+
X:89514561-89514760-	4.38722	7.20271	0.416756	0.804102	up	5	0	7.42275	3.03553	X	89514560	89514760	-
1:237079355-237083262-	4.38722	7.20271	0.416756	0.804102	up	5	0	7.42275	3.03553	1	237079354	237083262	-
2:129550167-129551698+	4.38722	7.20271	0.416756	0.804102	up	5	0	7.42275	3.03553	2	129550166	129551698	+
3:38883761-38883976+	4.38722	7.20271	0.416756	0.804102	up	5	0	7.42275	3.03553	3	38883760	38883976	+
8:27886648-27887462-	4.38722	7.20271	0.416756	0.804102	up	5	0	7.42275	3.03553	8	27886647	27887462	-
18:65568321-65570251+	4.38722	7.20271	0.416756	0.804102	up	5	0	7.42275	3.03553	18	65568320	65570251	+
6:67217180-67221883-	4.38722	7.20271	0.416756	0.804102	up	5	0	7.42275	3.03553	6	67217179	67221883	-
5:20299555-20324783+	4.38722	7.20271	0.416756	0.804102	up	5	0	7.42275	3.03553	5	20299554	20324783	+
23:899295-937162-	4.38722	7.20271	0.416756	0.804102	up	5	0	7.42275	3.03553	23	899294	937162	-
3:167911104-167913129+	4.38722	7.20271	0.416756	0.804102	up	5	0	7.42275	3.03553	3	167911103	167913129	+
1:237129367-237155442+	4.38722	7.20271	0.416756	0.804102	up	5	0	7.42275	3.03553	1	237129366	237155442	+
24:614018-615040+	4.38722	7.20271	0.416756	0.804102	up	5	0	7.42275	3.03553	24	614017	615040	+
22:17123254-17135777-	4.38722	7.20271	0.416756	0.804102	up	5	0	7.42275	3.03553	22	17123253	17135777	-
3:207359718-207362048-	4.38722	7.20271	0.416756	0.804102	up	5	0	7.42275	3.03553	3	207359717	207362048	-
2:129551520-129551698+	4.38722	7.20271	0.416756	0.804102	up	5	0	7.42275	3.03553	2	129551519	129551698	+
7:42860407-42863836+	4.38722	7.20271	0.416756	0.804102	up	5	0	7.42275	3.03553	7	42860406	42863836	+
1:111318570-111334722+	4.38722	7.20271	0.416756	0.804102	up	5	0	7.42275	3.03553	1	111318569	111334722	+
2:246087723-246142280+	4.38722	7.20271	0.416756	0.804102	up	5	0	7.42275	3.03553	2	246087722	246142280	+
4:103855037-103878054-	4.38722	7.20271	0.416756	0.804102	up	5	0	7.42275	3.03553	4	103855036	103878054	-
6:5981820-6054532+	4.38722	7.20271	0.416756	0.804102	up	5	0	7.42275	3.03553	6	5981819	6054532	+
17:10038206-10046342-	4.38722	7.20271	0.416756	0.804102	up	5	0	7.42275	3.03553	17	10038205	10046342	-
25:14187511-14193370+	4.38722	7.20271	0.416756	0.804102	up	5	0	7.42275	3.03553	25	14187510	14193370	+
12:73593477-73595596+	4.38722	7.20271	0.416756	0.804102	up	5	0	7.42275	3.03553	12	73593476	73595596	+
2:149286259-149300936+	4.38722	7.20271	0.416756	0.804102	up	5	0	7.42275	3.03553	2	149286258	149300936	+
26:32125522-32135043-	4.38722	7.20271	0.416756	0.804102	up	5	0	7.42275	3.03553	26	32125521	32135043	-
24:3143661-3209758-	4.38722	7.20271	0.416756	0.804102	up	5	0	7.42275	3.03553	24	3143660	3209758	-
14:23709985-23714781+	4.38722	7.20271	0.416756	0.804102	up	5	0	7.42275	3.03553	14	23709984	23714781	+
2:244571200-244608081+	4.38722	7.20271	0.416756	0.804102	up	5	0	7.42275	3.03553	2	244571199	244608081	+
3:187343186-187350316-	4.38722	7.20271	0.416756	0.804102	up	5	0	7.42275	3.03553	3	187343185	187350316	-
AMGL01123075.1:3984-6040-	4.38722	7.20271	0.416756	0.804102	up	5	0	7.42275	3.03553	AMGL01123075.1	3983	6040	-
23:905827-954991-	4.38722	7.20271	0.416756	0.804102	up	5	0	7.42275	3.03553	23	905826	954991	-
11:14248813-14249209+	4.38722	7.20271	0.416756	0.804102	up	5	0	7.42275	3.03553	11	14248812	14249209	+
10:21995335-22000822+	4.38722	7.20271	0.416756	0.804102	up	5	0	7.42275	3.03553	10	21995334	22000822	+
2:73016376-73019004-	4.38722	7.20271	0.416756	0.804102	up	5	0	7.42275	3.03553	2	73016375	73019004	-
3:12679348-12713899-	4.38722	7.20271	0.416756	0.804102	up	5	0	7.42275	3.03553	3	12679347	12713899	-
1:213441608-213466453-	4.38722	7.20271	0.416756	0.804102	up	5	0	7.42275	3.03553	1	213441607	213466453	-
15:42196391-42228029+	4.38722	7.20271	0.416756	0.804102	up	5	0	7.42275	3.03553	15	42196390	42228029	+
24:21093522-21124483-	4.38722	7.20271	0.416756	0.804102	up	5	0	7.42275	3.03553	24	21093521	21124483	-
17:9969015-9975542-	4.38722	7.20271	0.416756	0.804102	up	5	0	7.42275	3.03553	17	9969014	9975542	-
X:56817427-56820896+	4.38722	7.20271	0.416756	0.804102	up	5	0	7.42275	3.03553	X	56817426	56820896	+
16:40233762-40235007-	4.38722	7.20271	0.416756	0.804102	up	5	0	7.42275	3.03553	16	40233761	40235007	-
10:18168380-18176328-	4.38722	7.20271	0.416756	0.804102	up	5	0	7.42275	3.03553	10	18168379	18176328	-
2:210239720-210239992-	4.38722	7.20271	0.416756	0.804102	up	5	0	7.42275	3.03553	2	210239719	210239992	-
4:82145519-82155482+	4.38722	7.20271	0.416756	0.804102	up	5	0	7.42275	3.03553	4	82145518	82155482	+
2:118420464-118425288-	4.38722	7.20271	0.416756	0.804102	up	5	0	7.42275	3.03553	2	118420463	118425288	-
1:71463521-71472038+	4.24892	12.4013	0.196132	0.804102	up	311	16	13.3121	9.06319	1	71463520	71472038	+
5:19169711-19186266+	4.18836	11.6889	0.204729	0.804102	up	188	10	12.5867	8.39833	5	19169710	19186266	+
25:24339533-24357546-	4.15089	9.55464	0.234593	0.804102	up	40	2	10.3611	6.21024	25	24339532	24357546	-
6:87859382-87941765-	4.08242	7.03308	0.477685	0.804102	up	4	0	7.11796	3.03553	6	87859381	87941765	-
24:41594635-41602980-	4.08242	7.03308	0.477685	0.804102	up	4	0	7.11796	3.03553	24	41594634	41602980	-
17:62390564-62392280+	4.08242	7.03308	0.477685	0.804102	up	4	0	7.11796	3.03553	17	62390563	62392280	+
15:38044135-38044718+	4.08242	7.03308	0.477685	0.804102	up	4	0	7.11796	3.03553	15	38044134	38044718	+
2:42872521-42898319-	4.08242	7.03308	0.477685	0.804102	up	4	0	7.11796	3.03553	2	42872520	42898319	-
2:58931099-58966615-	4.08242	7.03308	0.477685	0.804102	up	4	0	7.11796	3.03553	2	58931098	58966615	-
7:35115631-35149612-	4.08242	7.03308	0.477685	0.804102	up	4	0	7.11796	3.03553	7	35115630	35149612	-
12:63843604-63848985-	4.08242	7.03308	0.477685	0.804102	up	4	0	7.11796	3.03553	12	63843603	63848985	-
22:39794832-39811392+	4.08242	7.03308	0.477685	0.804102	up	4	0	7.11796	3.03553	22	39794831	39811392	+
20:32222598-32241769-	4.08242	7.03308	0.477685	0.804102	up	4	0	7.11796	3.03553	20	32222597	32241769	-
21:40264602-40264929-	4.08242	7.03308	0.477685	0.804102	up	4	0	7.11796	3.03553	21	40264601	40264929	-
1:104175907-104256059-	4.08242	7.03308	0.477685	0.804102	up	4	0	7.11796	3.03553	1	104175906	104256059	-
2:50944887-50945905-	4.08242	7.03308	0.477685	0.804102	up	4	0	7.11796	3.03553	2	50944886	50945905	-
11:34495625-34501679+	4.08242	7.03308	0.477685	0.804102	up	4	0	7.11796	3.03553	11	34495624	34501679	+
13:32444873-32445181-	4.08242	7.03308	0.477685	0.804102	up	4	0	7.11796	3.03553	13	32444872	32445181	-
20:35898463-35993569-	4.08242	7.03308	0.477685	0.804102	up	4	0	7.11796	3.03553	20	35898462	35993569	-
9:84975593-84993517+	4.08242	7.03308	0.477685	0.804102	up	4	0	7.11796	3.03553	9	84975592	84993517	+
3:169976104-170006418+	4.08242	7.03308	0.477685	0.804102	up	4	0	7.11796	3.03553	3	169976103	170006418	+
X:108056893-108060344-	4.08242	7.03308	0.477685	0.804102	up	4	0	7.11796	3.03553	X	108056892	108060344	-
1:189793249-189805546-	4.08242	7.03308	0.477685	0.804102	up	4	0	7.11796	3.03553	1	189793248	189805546	-
21:46829591-46829746+	4.08242	7.03308	0.477685	0.804102	up	4	0	7.11796	3.03553	21	46829590	46829746	+
15:43063020-43092067+	4.08242	7.03308	0.477685	0.804102	up	4	0	7.11796	3.03553	15	43063019	43092067	+
1:139171200-139197091-	4.08242	7.03308	0.477685	0.804102	up	4	0	7.11796	3.03553	1	139171199	139197091	-
4:95163916-95207704+	4.08242	7.03308	0.477685	0.804102	up	4	0	7.11796	3.03553	4	95163915	95207704	+
10:19195215-19195784+	4.08242	7.03308	0.477685	0.804102	up	4	0	7.11796	3.03553	10	19195214	19195784	+
2:31463200-31476765-	4.08242	7.03308	0.477685	0.804102	up	4	0	7.11796	3.03553	2	31463199	31476765	-
2:135800574-135813919-	4.08242	7.03308	0.477685	0.804102	up	4	0	7.11796	3.03553	2	135800573	135813919	-
8:25368301-25424802+	4.08242	7.03308	0.477685	0.804102	up	4	0	7.11796	3.03553	8	25368300	25424802	+
8:67875256-67875863-	4.08242	7.03308	0.477685	0.804102	up	4	0	7.11796	3.03553	8	67875255	67875863	-
20:40478816-40478992-	4.08242	7.03308	0.477685	0.804102	up	4	0	7.11796	3.03553	20	40478815	40478992	-
17:32000996-32001645+	4.08242	7.03308	0.477685	0.804102	up	4	0	7.11796	3.03553	17	32000995	32001645	+
19:50242728-50265988-	4.08242	7.03308	0.477685	0.804102	up	4	0	7.11796	3.03553	19	50242727	50265988	-
2:34748191-34807260-	4.08242	7.03308	0.477685	0.804102	up	4	0	7.11796	3.03553	2	34748190	34807260	-
15:13859863-13883893+	4.08242	7.03308	0.477685	0.804102	up	4	0	7.11796	3.03553	15	13859862	13883893	+
3:202522099-202542384+	4.08242	7.03308	0.477685	0.804102	up	4	0	7.11796	3.03553	3	202522098	202542384	+
3:99473212-99490163-	4.08242	7.03308	0.477685	0.804102	up	4	0	7.11796	3.03553	3	99473211	99490163	-
22:23541485-23542482-	4.08242	7.03308	0.477685	0.804102	up	4	0	7.11796	3.03553	22	23541484	23542482	-
8:2602007-2607618+	4.08242	7.03308	0.477685	0.804102	up	4	0	7.11796	3.03553	8	2602006	2607618	+
6:21895999-21896235+	4.08242	7.03308	0.477685	0.804102	up	4	0	7.11796	3.03553	6	21895998	21896235	+
24:14149516-14194224+	4.08242	7.03308	0.477685	0.804102	up	4	0	7.11796	3.03553	24	14149515	14194224	+
14:23627311-23633359+	4.08242	7.03308	0.477685	0.804102	up	4	0	7.11796	3.03553	14	23627310	23633359	+
16:37007432-37007611-	4.08242	7.03308	0.477685	0.804102	up	4	0	7.11796	3.03553	16	37007431	37007611	-
9:15966566-15967215+	4.08242	7.03308	0.477685	0.804102	up	4	0	7.11796	3.03553	9	15966565	15967215	+
4:99202879-99203560+	4.08242	7.03308	0.477685	0.804102	up	4	0	7.11796	3.03553	4	99202878	99203560	+
15:76080938-76086422+	4.08242	7.03308	0.477685	0.804102	up	4	0	7.11796	3.03553	15	76080937	76086422	+
20:31233970-31271240-	4.08242	7.03308	0.477685	0.804102	up	4	0	7.11796	3.03553	20	31233969	31271240	-
4:68300644-68342362+	4.08242	7.03308	0.477685	0.804102	up	4	0	7.11796	3.03553	4	68300643	68342362	+
3:188196995-188251407+	4.08242	7.03308	0.477685	0.804102	up	4	0	7.11796	3.03553	3	188196994	188251407	+
1:237057199-237072012-	4.08242	7.03308	0.477685	0.804102	up	4	0	7.11796	3.03553	1	237057198	237072012	-
3:127384786-127388522-	4.08242	7.03308	0.477685	0.804102	up	4	0	7.11796	3.03553	3	127384785	127388522	-
2:74524906-74528754+	4.08242	7.03308	0.477685	0.804102	up	4	0	7.11796	3.03553	2	74524905	74528754	+
3:202473967-202485293+	4.08242	7.03308	0.477685	0.804102	up	4	0	7.11796	3.03553	3	202473966	202485293	+
11:36824923-36830466+	4.08242	7.03308	0.477685	0.804102	up	4	0	7.11796	3.03553	11	36824922	36830466	+
1:200499318-200578787-	4.08242	7.03308	0.477685	0.804102	up	4	0	7.11796	3.03553	1	200499317	200578787	-
7:81738684-81772312-	4.08242	7.03308	0.477685	0.804102	up	4	0	7.11796	3.03553	7	81738683	81772312	-
2:49328628-49328861+	4.08242	7.03308	0.477685	0.804102	up	4	0	7.11796	3.03553	2	49328627	49328861	+
X:111336392-111361979+	4.08242	7.03308	0.477685	0.804102	up	4	0	7.11796	3.03553	X	111336391	111361979	+
16:71532223-71532401+	4.08242	7.03308	0.477685	0.804102	up	4	0	7.11796	3.03553	16	71532222	71532401	+
3:69811119-69811314+	4.08242	7.03308	0.477685	0.804102	up	4	0	7.11796	3.03553	3	69811118	69811314	+
1:53631816-53669137+	4.08242	7.03308	0.477685	0.804102	up	4	0	7.11796	3.03553	1	53631815	53669137	+
22:40664397-40701358-	4.08242	7.03308	0.477685	0.804102	up	4	0	7.11796	3.03553	22	40664396	40701358	-
7:45128759-45132617+	4.08242	7.03308	0.477685	0.804102	up	4	0	7.11796	3.03553	7	45128758	45132617	+
19:53701257-53701988-	4.08242	7.03308	0.477685	0.804102	up	4	0	7.11796	3.03553	19	53701256	53701988	-
1:50009655-50024967+	4.08242	7.03308	0.477685	0.804102	up	4	0	7.11796	3.03553	1	50009654	50024967	+
18:13279359-13286853-	4.08242	7.03308	0.477685	0.804102	up	4	0	7.11796	3.03553	18	13279358	13286853	-
10:76205624-76249831+	4.08242	7.03308	0.477685	0.804102	up	4	0	7.11796	3.03553	10	76205623	76249831	+
1:264112099-264112696-	4.08242	7.03308	0.477685	0.804102	up	4	0	7.11796	3.03553	1	264112098	264112696	-
5:35084980-35085186+	4.08242	7.03308	0.477685	0.804102	up	4	0	7.11796	3.03553	5	35084979	35085186	+
1:98337482-98337942-	4.08242	7.03308	0.477685	0.804102	up	4	0	7.11796	3.03553	1	98337481	98337942	-
3:132944831-132945804+	4.08242	7.03308	0.477685	0.804102	up	4	0	7.11796	3.03553	3	132944830	132945804	+
5:44946024-44962691+	4.08242	7.03308	0.477685	0.804102	up	4	0	7.11796	3.03553	5	44946023	44962691	+
14:62375453-62375606+	4.08242	7.03308	0.477685	0.804102	up	4	0	7.11796	3.03553	14	62375452	62375606	+
X:89514357-89514560-	4.08242	7.03308	0.477685	0.804102	up	4	0	7.11796	3.03553	X	89514356	89514560	-
5:49622851-49661375+	4.08242	7.03308	0.477685	0.804102	up	4	0	7.11796	3.03553	5	49622850	49661375	+
15:75041730-75046943-	4.08242	7.03308	0.477685	0.804102	up	4	0	7.11796	3.03553	15	75041729	75046943	-
2:81138565-81186611-	4.08242	7.03308	0.477685	0.804102	up	4	0	7.11796	3.03553	2	81138564	81186611	-
14:57674627-57699420-	4.08242	7.03308	0.477685	0.804102	up	4	0	7.11796	3.03553	14	57674626	57699420	-
2:63740817-63741331-	4.08242	7.03308	0.477685	0.804102	up	4	0	7.11796	3.03553	2	63740816	63741331	-
22:377014-390975+	4.08242	7.03308	0.477685	0.804102	up	4	0	7.11796	3.03553	22	377013	390975	+
8:26157528-26195219+	4.08242	7.03308	0.477685	0.804102	up	4	0	7.11796	3.03553	8	26157527	26195219	+
26:37402152-37418627+	4.08242	7.03308	0.477685	0.804102	up	4	0	7.11796	3.03553	26	37402151	37418627	+
2:111526183-111581802-	4.08242	7.03308	0.477685	0.804102	up	4	0	7.11796	3.03553	2	111526182	111581802	-
3:80248592-80297179+	4.08242	7.03308	0.477685	0.804102	up	4	0	7.11796	3.03553	3	80248591	80297179	+
8:68849213-68855149+	4.08242	7.03308	0.477685	0.804102	up	4	0	7.11796	3.03553	8	68849212	68855149	+
2:168374820-168400069+	4.08242	7.03308	0.477685	0.804102	up	4	0	7.11796	3.03553	2	168374819	168400069	+
1:100264965-100283344-	4.08242	7.03308	0.477685	0.804102	up	4	0	7.11796	3.03553	1	100264964	100283344	-
3:40010808-40012231+	4.08242	7.03308	0.477685	0.804102	up	4	0	7.11796	3.03553	3	40010807	40012231	+
6:19093795-19113955+	4.08242	7.03308	0.477685	0.804102	up	4	0	7.11796	3.03553	6	19093794	19113955	+
16:63674966-63675160+	4.08242	7.03308	0.477685	0.804102	up	4	0	7.11796	3.03553	16	63674965	63675160	+
7:67430392-67432931+	4.08242	7.03308	0.477685	0.804102	up	4	0	7.11796	3.03553	7	67430391	67432931	+
X:64520610-64520784-	4.08242	7.03308	0.477685	0.804102	up	4	0	7.11796	3.03553	X	64520609	64520784	-
3:18625753-18642375+	4.08242	7.03308	0.477685	0.804102	up	4	0	7.11796	3.03553	3	18625752	18642375	+
20:16422026-16425634+	4.08242	7.03308	0.477685	0.804102	up	4	0	7.11796	3.03553	20	16422025	16425634	+
4:93999891-94010350-	4.08242	7.03308	0.477685	0.804102	up	4	0	7.11796	3.03553	4	93999890	94010350	-
12:55276734-55347754-	4.08242	7.03308	0.477685	0.804102	up	4	0	7.11796	3.03553	12	55276733	55347754	-
7:10873589-10901270-	4.08242	7.03308	0.477685	0.804102	up	4	0	7.11796	3.03553	7	10873588	10901270	-
26:14586641-14587593+	4.08242	7.03308	0.477685	0.804102	up	4	0	7.11796	3.03553	26	14586640	14587593	+
22:21573995-21595148-	4.08242	7.03308	0.477685	0.804102	up	4	0	7.11796	3.03553	22	21573994	21595148	-
1:198301992-198302630+	4.08242	7.03308	0.477685	0.804102	up	4	0	7.11796	3.03553	1	198301991	198302630	+
21:2134712-2138017-	4.08242	7.03308	0.477685	0.804102	up	4	0	7.11796	3.03553	21	2134711	2138017	-
7:35115631-35168949-	4.08242	7.03308	0.477685	0.804102	up	4	0	7.11796	3.03553	7	35115630	35168949	-
11:53066798-53076280-	4.08242	7.03308	0.477685	0.804102	up	4	0	7.11796	3.03553	11	53066797	53076280	-
1:41896790-41897108+	4.08242	7.03308	0.477685	0.804102	up	4	0	7.11796	3.03553	1	41896789	41897108	+
1:237058174-237072012-	4.08242	7.03308	0.477685	0.804102	up	4	0	7.11796	3.03553	1	237058173	237072012	-
11:38585251-38603398+	4.08242	7.03308	0.477685	0.804102	up	4	0	7.11796	3.03553	11	38585250	38603398	+
18:66736432-66805889+	4.08242	7.03308	0.477685	0.804102	up	4	0	7.11796	3.03553	18	66736431	66805889	+
22:40760622-40776160-	4.08242	7.03308	0.477685	0.804102	up	4	0	7.11796	3.03553	22	40760621	40776160	-
19:22312972-22363161+	4.08242	7.03308	0.477685	0.804102	up	4	0	7.11796	3.03553	19	22312971	22363161	+
1:190337693-190337902-	4.08242	7.03308	0.477685	0.804102	up	4	0	7.11796	3.03553	1	190337692	190337902	-
6:83177350-83194210-	4.08242	7.03308	0.477685	0.804102	up	4	0	7.11796	3.03553	6	83177349	83194210	-
2:74212156-74250371+	4.08242	7.03308	0.477685	0.804102	up	4	0	7.11796	3.03553	2	74212155	74250371	+
2:150800707-150816653+	4.08242	7.03308	0.477685	0.804102	up	4	0	7.11796	3.03553	2	150800706	150816653	+
15:40072021-40103881-	4.08242	7.03308	0.477685	0.804102	up	4	0	7.11796	3.03553	15	40072020	40103881	-
18:11933154-11934456-	4.08242	7.03308	0.477685	0.804102	up	4	0	7.11796	3.03553	18	11933153	11934456	-
9:56849472-56887714-	4.08242	7.03308	0.477685	0.804102	up	4	0	7.11796	3.03553	9	56849471	56887714	-
1:176769842-176770350+	4.08242	7.03308	0.477685	0.804102	up	4	0	7.11796	3.03553	1	176769841	176770350	+
8:47317945-47327907+	4.08242	7.03308	0.477685	0.804102	up	4	0	7.11796	3.03553	8	47317944	47327907	+
1:200361077-200364594-	4.08242	7.03308	0.477685	0.804102	up	4	0	7.11796	3.03553	1	200361076	200364594	-
X:75974477-75978399-	4.08242	7.03308	0.477685	0.804102	up	4	0	7.11796	3.03553	X	75974476	75978399	-
26:32950270-32959690+	4.08242	7.03308	0.477685	0.804102	up	4	0	7.11796	3.03553	26	32950269	32959690	+
21:41547171-41549218+	4.08242	7.03308	0.477685	0.804102	up	4	0	7.11796	3.03553	21	41547170	41549218	+
25:16103530-16103695-	4.08242	7.03308	0.477685	0.804102	up	4	0	7.11796	3.03553	25	16103529	16103695	-
16:63609248-63675160+	4.08242	7.03308	0.477685	0.804102	up	4	0	7.11796	3.03553	16	63609247	63675160	+
2:160420925-160441965+	4.08242	7.03308	0.477685	0.804102	up	4	0	7.11796	3.03553	2	160420924	160441965	+
2:185632084-185632612-	4.08242	7.03308	0.477685	0.804102	up	4	0	7.11796	3.03553	2	185632083	185632612	-
9:76705284-76710107+	4.08242	7.03308	0.477685	0.804102	up	4	0	7.11796	3.03553	9	76705283	76710107	+
12:28614090-28617855+	4.08242	7.03308	0.477685	0.804102	up	4	0	7.11796	3.03553	12	28614089	28617855	+
3:38362898-38365195-	4.08242	7.03308	0.477685	0.804102	up	4	0	7.11796	3.03553	3	38362897	38365195	-
3:179147232-179167592-	4.08242	7.03308	0.477685	0.804102	up	4	0	7.11796	3.03553	3	179147231	179167592	-
2:223772551-223802183-	4.08242	7.03308	0.477685	0.804102	up	4	0	7.11796	3.03553	2	223772550	223802183	-
24:33115464-33115614+	4.08242	7.03308	0.477685	0.804102	up	4	0	7.11796	3.03553	24	33115463	33115614	+
3:91331792-91337635+	4.08242	7.03308	0.477685	0.804102	up	4	0	7.11796	3.03553	3	91331791	91337635	+
1:205913845-205914144+	4.08242	7.03308	0.477685	0.804102	up	4	0	7.11796	3.03553	1	205913844	205914144	+
15:15602256-15626999+	4.08242	7.03308	0.477685	0.804102	up	4	0	7.11796	3.03553	15	15602255	15626999	+
24:2509741-2521746+	4.08242	7.03308	0.477685	0.804102	up	4	0	7.11796	3.03553	24	2509740	2521746	+
6:102006221-102006409+	4.08242	7.03308	0.477685	0.804102	up	4	0	7.11796	3.03553	6	102006220	102006409	+
3:31426122-31426506-	4.08242	7.03308	0.477685	0.804102	up	4	0	7.11796	3.03553	3	31426121	31426506	-
5:44946024-44976562+	4.08242	7.03308	0.477685	0.804102	up	4	0	7.11796	3.03553	5	44946023	44976562	+
17:62458618-62465344+	4.08242	7.03308	0.477685	0.804102	up	4	0	7.11796	3.03553	17	62458617	62465344	+
2:70643570-70644777-	4.08242	7.03308	0.477685	0.804102	up	4	0	7.11796	3.03553	2	70643569	70644777	-
X:62843428-62875445-	4.08242	7.03308	0.477685	0.804102	up	4	0	7.11796	3.03553	X	62843427	62875445	-
7:35095794-35122946-	4.08242	7.03308	0.477685	0.804102	up	4	0	7.11796	3.03553	7	35095793	35122946	-
17:43037475-43043177+	4.08242	7.03308	0.477685	0.804102	up	4	0	7.11796	3.03553	17	43037474	43043177	+
2:204350016-204350995-	4.08242	7.03308	0.477685	0.804102	up	4	0	7.11796	3.03553	2	204350015	204350995	-
1:98200317-98203961+	4.08242	7.03308	0.477685	0.804102	up	4	0	7.11796	3.03553	1	98200316	98203961	+
11:34666217-34666412+	4.08242	7.03308	0.477685	0.804102	up	4	0	7.11796	3.03553	11	34666216	34666412	+
7:9019063-9071078-	4.08242	7.03308	0.477685	0.804102	up	4	0	7.11796	3.03553	7	9019062	9071078	-
13:6636260-6636466-	4.08242	7.03308	0.477685	0.804102	up	4	0	7.11796	3.03553	13	6636259	6636466	-
2:192548635-192549143+	4.08242	7.03308	0.477685	0.804102	up	4	0	7.11796	3.03553	2	192548634	192549143	+
23:40340349-40344143-	4.08242	7.03308	0.477685	0.804102	up	4	0	7.11796	3.03553	23	40340348	40344143	-
2:30669927-30672262+	4.08242	7.03308	0.477685	0.804102	up	4	0	7.11796	3.03553	2	30669926	30672262	+
12:64921689-65003707+	4.08242	7.03308	0.477685	0.804102	up	4	0	7.11796	3.03553	12	64921688	65003707	+
6:34314863-34321751-	4.08242	7.03308	0.477685	0.804102	up	4	0	7.11796	3.03553	6	34314862	34321751	-
8:15817930-15822217+	4.08242	7.03308	0.477685	0.804102	up	4	0	7.11796	3.03553	8	15817929	15822217	+
23:20443668-20443852+	4.08242	7.03308	0.477685	0.804102	up	4	0	7.11796	3.03553	23	20443667	20443852	+
2:127208782-127218775-	4.08242	7.03308	0.477685	0.804102	up	4	0	7.11796	3.03553	2	127208781	127218775	-
12:36441599-36443961-	4.08242	7.03308	0.477685	0.804102	up	4	0	7.11796	3.03553	12	36441598	36443961	-
6:94299448-94351870-	4.08242	7.03308	0.477685	0.804102	up	4	0	7.11796	3.03553	6	94299447	94351870	-
5:36306752-36307187-	4.08242	7.03308	0.477685	0.804102	up	4	0	7.11796	3.03553	5	36306751	36307187	-
21:28595792-28596956-	4.08242	7.03308	0.477685	0.804102	up	4	0	7.11796	3.03553	21	28595791	28596956	-
12:68805065-68811414+	4.08242	7.03308	0.477685	0.804102	up	4	0	7.11796	3.03553	12	68805064	68811414	+
X:42024420-42028109+	4.08242	7.03308	0.477685	0.804102	up	4	0	7.11796	3.03553	X	42024419	42028109	+
9:3800097-3820851-	4.08242	7.03308	0.477685	0.804102	up	4	0	7.11796	3.03553	9	3800096	3820851	-
19:44357493-44397048+	4.08242	7.03308	0.477685	0.804102	up	4	0	7.11796	3.03553	19	44357492	44397048	+
3:78723141-78725703+	4.08242	7.03308	0.477685	0.804102	up	4	0	7.11796	3.03553	3	78723140	78725703	+
5:7979148-7985260+	4.08242	7.03308	0.477685	0.804102	up	4	0	7.11796	3.03553	5	7979147	7985260	+
1:103916520-103916711+	4.08242	7.03308	0.477685	0.804102	up	4	0	7.11796	3.03553	1	103916519	103916711	+
6:45941720-45954859+	4.08242	7.03308	0.477685	0.804102	up	4	0	7.11796	3.03553	6	45941719	45954859	+
3:103806507-103807187+	4.08242	7.03308	0.477685	0.804102	up	4	0	7.11796	3.03553	3	103806506	103807187	+
7:9319470-9330161+	4.08242	7.03308	0.477685	0.804102	up	4	0	7.11796	3.03553	7	9319469	9330161	+
X:113342354-113349742+	4.08242	7.03308	0.477685	0.804102	up	4	0	7.11796	3.03553	X	113342353	113349742	+
9:94077268-94092439+	4.08242	7.03308	0.477685	0.804102	up	4	0	7.11796	3.03553	9	94077267	94092439	+
23:56316247-56349787+	4.08242	7.03308	0.477685	0.804102	up	4	0	7.11796	3.03553	23	56316246	56349787	+
11:40413991-40415626-	4.08242	7.03308	0.477685	0.804102	up	4	0	7.11796	3.03553	11	40413990	40415626	-
2:184186427-184204532+	4.08242	7.03308	0.477685	0.804102	up	4	0	7.11796	3.03553	2	184186426	184204532	+
15:43348225-43361633+	4.08242	7.03308	0.477685	0.804102	up	4	0	7.11796	3.03553	15	43348224	43361633	+
4:40077116-40097168+	4.08242	7.03308	0.477685	0.804102	up	4	0	7.11796	3.03553	4	40077115	40097168	+
7:6448092-6450080-	4.08242	7.03308	0.477685	0.804102	up	4	0	7.11796	3.03553	7	6448091	6450080	-
3:7380822-7381160+	4.08242	7.03308	0.477685	0.804102	up	4	0	7.11796	3.03553	3	7380821	7381160	+
1:191366638-191371939+	4.08242	7.03308	0.477685	0.804102	up	4	0	7.11796	3.03553	1	191366637	191371939	+
5:91063264-91069663-	4.08242	7.03308	0.477685	0.804102	up	4	0	7.11796	3.03553	5	91063263	91069663	-
5:4045517-4045681+	4.08242	7.03308	0.477685	0.804102	up	4	0	7.11796	3.03553	5	4045516	4045681	+
2:117955428-117955601-	4.08242	7.03308	0.477685	0.804102	up	4	0	7.11796	3.03553	2	117955427	117955601	-
X:121567541-121584801-	4.08242	7.03308	0.477685	0.804102	up	4	0	7.11796	3.03553	X	121567540	121584801	-
3:188174599-188175945+	4.08242	7.03308	0.477685	0.804102	up	4	0	7.11796	3.03553	3	188174598	188175945	+
14:14511266-14518028-	4.08242	7.03308	0.477685	0.804102	up	4	0	7.11796	3.03553	14	14511265	14518028	-
23:54832749-54848909-	4.08242	7.03308	0.477685	0.804102	up	4	0	7.11796	3.03553	23	54832748	54848909	-
12:58474386-58488422+	4.08242	7.03308	0.477685	0.804102	up	4	0	7.11796	3.03553	12	58474385	58488422	+
2:11985325-12003267+	4.08242	7.03308	0.477685	0.804102	up	4	0	7.11796	3.03553	2	11985324	12003267	+
4:114135277-114146094-	4.08242	7.03308	0.477685	0.804102	up	4	0	7.11796	3.03553	4	114135276	114146094	-
10:12204154-12204353-	4.08242	7.03308	0.477685	0.804102	up	4	0	7.11796	3.03553	10	12204153	12204353	-
6:41918509-41934802-	4.08242	7.03308	0.477685	0.804102	up	4	0	7.11796	3.03553	6	41918508	41934802	-
12:39983338-39989278-	4.08242	7.03308	0.477685	0.804102	up	4	0	7.11796	3.03553	12	39983337	39989278	-
9:94003691-94008963+	4.08242	7.03308	0.477685	0.804102	up	4	0	7.11796	3.03553	9	94003690	94008963	+
11:44245186-44245446+	4.08242	7.03308	0.477685	0.804102	up	4	0	7.11796	3.03553	11	44245185	44245446	+
2:34761597-34804081-	4.08242	7.03308	0.477685	0.804102	up	4	0	7.11796	3.03553	2	34761596	34804081	-
1:215441731-215445809+	4.08242	7.03308	0.477685	0.804102	up	4	0	7.11796	3.03553	1	215441730	215445809	+
7:50054713-50057151-	4.08242	7.03308	0.477685	0.804102	up	4	0	7.11796	3.03553	7	50054712	50057151	-
5:90564554-90571217-	4.08242	7.03308	0.477685	0.804102	up	4	0	7.11796	3.03553	5	90564553	90571217	-
4:24760972-24833181-	4.08242	7.03308	0.477685	0.804102	up	4	0	7.11796	3.03553	4	24760971	24833181	-
2:204134343-204166789+	4.08242	7.03308	0.477685	0.804102	up	4	0	7.11796	3.03553	2	204134342	204166789	+
25:29118799-29146229+	4.08242	7.03308	0.477685	0.804102	up	4	0	7.11796	3.03553	25	29118798	29146229	+
9:28421795-28422057-	4.08242	7.03308	0.477685	0.804102	up	4	0	7.11796	3.03553	9	28421794	28422057	-
13:72037852-72078477+	4.08242	7.03308	0.477685	0.804102	up	4	0	7.11796	3.03553	13	72037851	72078477	+
26:40366655-40369966+	4.08242	7.03308	0.477685	0.804102	up	4	0	7.11796	3.03553	26	40366654	40369966	+
23:35582886-35585242-	4.08242	7.03308	0.477685	0.804102	up	4	0	7.11796	3.03553	23	35582885	35585242	-
6:22585271-22594995+	4.08242	7.03308	0.477685	0.804102	up	4	0	7.11796	3.03553	6	22585270	22594995	+
2:219301354-219306986+	4.08242	7.03308	0.477685	0.804102	up	4	0	7.11796	3.03553	2	219301353	219306986	+
8:50966019-50967372+	4.08242	7.03308	0.477685	0.804102	up	4	0	7.11796	3.03553	8	50966018	50967372	+
21:8987224-9005718+	4.08242	7.03308	0.477685	0.804102	up	4	0	7.11796	3.03553	21	8987223	9005718	+
X:38046766-38053623-	4.08242	7.03308	0.477685	0.804102	up	4	0	7.11796	3.03553	X	38046765	38053623	-
26:41054593-41058018+	4.08242	7.03308	0.477685	0.804102	up	4	0	7.11796	3.03553	26	41054592	41058018	+
11:35095826-35097826+	4.08242	7.03308	0.477685	0.804102	up	4	0	7.11796	3.03553	11	35095825	35097826	+
20:7392155-7394302+	4.08242	7.03308	0.477685	0.804102	up	4	0	7.11796	3.03553	20	7392154	7394302	+
1:226801417-226804492-	4.08242	7.03308	0.477685	0.804102	up	4	0	7.11796	3.03553	1	226801416	226804492	-
3:154977156-154978072-	4.08242	7.03308	0.477685	0.804102	up	4	0	7.11796	3.03553	3	154977155	154978072	-
2:225048667-225050500-	4.08242	7.03308	0.477685	0.804102	up	4	0	7.11796	3.03553	2	225048666	225050500	-
1:212792888-212794484-	4.08242	7.03308	0.477685	0.804102	up	4	0	7.11796	3.03553	1	212792887	212794484	-
13:32518848-32519611+	4.08242	7.03308	0.477685	0.804102	up	4	0	7.11796	3.03553	13	32518847	32519611	+
12:26757011-26766292-	4.08242	7.03308	0.477685	0.804102	up	4	0	7.11796	3.03553	12	26757010	26766292	-
19:10486069-10488409-	4.08242	7.03308	0.477685	0.804102	up	4	0	7.11796	3.03553	19	10486068	10488409	-
4:94316434-94321030-	4.08242	7.03308	0.477685	0.804102	up	4	0	7.11796	3.03553	4	94316433	94321030	-
5:90564554-90654687-	4.08242	7.03308	0.477685	0.804102	up	4	0	7.11796	3.03553	5	90564553	90654687	-
16:13581010-13600616-	4.08242	7.03308	0.477685	0.804102	up	4	0	7.11796	3.03553	16	13581009	13600616	-
5:44209030-44223661-	4.08242	7.03308	0.477685	0.804102	up	4	0	7.11796	3.03553	5	44209029	44223661	-
14:60834539-60834734-	4.08242	7.03308	0.477685	0.804102	up	4	0	7.11796	3.03553	14	60834538	60834734	-
21:28095137-28096716+	4.08242	7.03308	0.477685	0.804102	up	4	0	7.11796	3.03553	21	28095136	28096716	+
6:85850653-85852100-	4.08242	7.03308	0.477685	0.804102	up	4	0	7.11796	3.03553	6	85850652	85852100	-
4:16151864-16244020-	4.08242	7.03308	0.477685	0.804102	up	4	0	7.11796	3.03553	4	16151863	16244020	-
9:77701742-77701923-	4.08242	7.03308	0.477685	0.804102	up	4	0	7.11796	3.03553	9	77701741	77701923	-
4:31738295-31743504+	4.08242	7.03308	0.477685	0.804102	up	4	0	7.11796	3.03553	4	31738294	31743504	+
7:82943291-82944897+	4.08242	7.03308	0.477685	0.804102	up	4	0	7.11796	3.03553	7	82943290	82944897	+
15:51666771-51668033+	4.08242	7.03308	0.477685	0.804102	up	4	0	7.11796	3.03553	15	51666770	51668033	+
7:76070843-76094198+	4.08242	7.03308	0.477685	0.804102	up	4	0	7.11796	3.03553	7	76070842	76094198	+
13:65582602-65582965-	4.08242	7.03308	0.477685	0.804102	up	4	0	7.11796	3.03553	13	65582601	65582965	-
3:202496460-202529931+	4.08242	7.03308	0.477685	0.804102	up	4	0	7.11796	3.03553	3	202496459	202529931	+
23:35418024-35443044+	4.08242	7.03308	0.477685	0.804102	up	4	0	7.11796	3.03553	23	35418023	35443044	+
3:192307805-192329929-	4.08242	7.03308	0.477685	0.804102	up	4	0	7.11796	3.03553	3	192307804	192329929	-
8:371494-371712+	4.08242	7.03308	0.477685	0.804102	up	4	0	7.11796	3.03553	8	371493	371712	+
1:182481122-182499181+	4.08242	7.03308	0.477685	0.804102	up	4	0	7.11796	3.03553	1	182481121	182499181	+
3:90577359-90584765-	4.08242	7.03308	0.477685	0.804102	up	4	0	7.11796	3.03553	3	90577358	90584765	-
14:23738931-23739759-	4.08242	7.03308	0.477685	0.804102	up	4	0	7.11796	3.03553	14	23738930	23739759	-
3:214150045-214150219-	4.08242	7.03308	0.477685	0.804102	up	4	0	7.11796	3.03553	3	214150044	214150219	-
22:13230810-13252442+	4.08242	7.03308	0.477685	0.804102	up	4	0	7.11796	3.03553	22	13230809	13252442	+
3:166719932-166758878+	4.08242	7.03308	0.477685	0.804102	up	4	0	7.11796	3.03553	3	166719931	166758878	+
1:138747861-138748307-	4.08242	7.03308	0.477685	0.804102	up	4	0	7.11796	3.03553	1	138747860	138748307	-
18:59922620-59931582-	4.08242	7.03308	0.477685	0.804102	up	4	0	7.11796	3.03553	18	59922619	59931582	-
19:29283369-29283601-	4.08242	7.03308	0.477685	0.804102	up	4	0	7.11796	3.03553	19	29283368	29283601	-
1:121130888-121140625+	4.08242	7.03308	0.477685	0.804102	up	4	0	7.11796	3.03553	1	121130887	121140625	+
10:12698719-12708979+	4.08242	7.03308	0.477685	0.804102	up	4	0	7.11796	3.03553	10	12698718	12708979	+
2:63014634-63015867+	4.08242	7.03308	0.477685	0.804102	up	4	0	7.11796	3.03553	2	63014633	63015867	+
1:50023711-50048894+	4.08242	7.03308	0.477685	0.804102	up	4	0	7.11796	3.03553	1	50023710	50048894	+
15:42227916-42256002+	4.08242	7.03308	0.477685	0.804102	up	4	0	7.11796	3.03553	15	42227915	42256002	+
16:9391026-9391201+	4.08242	7.03308	0.477685	0.804102	up	4	0	7.11796	3.03553	16	9391025	9391201	+
8:27836393-27840238+	4.08242	7.03308	0.477685	0.804102	up	4	0	7.11796	3.03553	8	27836392	27840238	+
3:32778726-32874601-	4.08242	7.03308	0.477685	0.804102	up	4	0	7.11796	3.03553	3	32778725	32874601	-
16:23786706-23796944+	4.08242	7.03308	0.477685	0.804102	up	4	0	7.11796	3.03553	16	23786705	23796944	+
25:33567527-33569795-	4.08242	7.03308	0.477685	0.804102	up	4	0	7.11796	3.03553	25	33567526	33569795	-
1:38491411-38504890-	4.08242	7.03308	0.477685	0.804102	up	4	0	7.11796	3.03553	1	38491410	38504890	-
14:3776787-3784465-	4.08242	7.03308	0.477685	0.804102	up	4	0	7.11796	3.03553	14	3776786	3784465	-
19:43991120-43991386+	4.08242	7.03308	0.477685	0.804102	up	4	0	7.11796	3.03553	19	43991119	43991386	+
1:128723442-128723740+	4.08242	7.03308	0.477685	0.804102	up	4	0	7.11796	3.03553	1	128723441	128723740	+
13:50620903-50627260-	4.08242	7.03308	0.477685	0.804102	up	4	0	7.11796	3.03553	13	50620902	50627260	-
8:78223118-78241357+	4.08242	7.03308	0.477685	0.804102	up	4	0	7.11796	3.03553	8	78223117	78241357	+
6:115256588-115265502-	4.08242	7.03308	0.477685	0.804102	up	4	0	7.11796	3.03553	6	115256587	115265502	-
1:189927788-189937874-	4.08242	7.03308	0.477685	0.804102	up	4	0	7.11796	3.03553	1	189927787	189937874	-
8:68798821-68815946+	4.08242	7.03308	0.477685	0.804102	up	4	0	7.11796	3.03553	8	68798820	68815946	+
7:79538094-79596738+	4.08242	7.03308	0.477685	0.804102	up	4	0	7.11796	3.03553	7	79538093	79596738	+
4:81048396-81051481+	4.08242	7.03308	0.477685	0.804102	up	4	0	7.11796	3.03553	4	81048395	81051481	+
1:68318574-68334952+	4.08242	7.03308	0.477685	0.804102	up	4	0	7.11796	3.03553	1	68318573	68334952	+
7:12160344-12171950-	4.08242	7.03308	0.477685	0.804102	up	4	0	7.11796	3.03553	7	12160343	12171950	-
7:77928082-77928338+	4.08242	7.03308	0.477685	0.804102	up	4	0	7.11796	3.03553	7	77928081	77928338	+
12:10162458-10162876-	4.08242	7.03308	0.477685	0.804102	up	4	0	7.11796	3.03553	12	10162457	10162876	-
2:116209660-116267322-	4.08242	7.03308	0.477685	0.804102	up	4	0	7.11796	3.03553	2	116209659	116267322	-
8:68169632-68179531+	4.08242	7.03308	0.477685	0.804102	up	4	0	7.11796	3.03553	8	68169631	68179531	+
2:82164978-82169183-	4.08242	7.03308	0.477685	0.804102	up	4	0	7.11796	3.03553	2	82164977	82169183	-
21:42986444-42987003-	4.08242	7.03308	0.477685	0.804102	up	4	0	7.11796	3.03553	21	42986443	42987003	-
19:28287208-28287499+	4.08242	7.03308	0.477685	0.804102	up	4	0	7.11796	3.03553	19	28287207	28287499	+
X:96383630-96398105+	4.08242	7.03308	0.477685	0.804102	up	4	0	7.11796	3.03553	X	96383629	96398105	+
4:103850961-103891441-	4.08242	7.03308	0.477685	0.804102	up	4	0	7.11796	3.03553	4	103850960	103891441	-
3:135701318-135721269-	4.08242	7.03308	0.477685	0.804102	up	4	0	7.11796	3.03553	3	135701317	135721269	-
X:28496447-28501045-	4.08242	7.03308	0.477685	0.804102	up	4	0	7.11796	3.03553	X	28496446	28501045	-
16:31527685-31552687-	4.08242	7.03308	0.477685	0.804102	up	4	0	7.11796	3.03553	16	31527684	31552687	-
1:250636550-250704211+	4.08242	7.03308	0.477685	0.804102	up	4	0	7.11796	3.03553	1	250636549	250704211	+
X:57557447-57566686-	4.08242	7.03308	0.477685	0.804102	up	4	0	7.11796	3.03553	X	57557446	57566686	-
7:9785161-9797544-	4.08242	7.03308	0.477685	0.804102	up	4	0	7.11796	3.03553	7	9785160	9797544	-
1:115833616-115837012-	4.08242	7.03308	0.477685	0.804102	up	4	0	7.11796	3.03553	1	115833615	115837012	-
1:128723404-128723822+	4.08242	7.03308	0.477685	0.804102	up	4	0	7.11796	3.03553	1	128723403	128723822	+
6:17618103-17633188+	4.08242	7.03308	0.477685	0.804102	up	4	0	7.11796	3.03553	6	17618102	17633188	+
2:185221860-185222009-	4.08242	7.03308	0.477685	0.804102	up	4	0	7.11796	3.03553	2	185221859	185222009	-
24:22605757-22606492-	4.08242	7.03308	0.477685	0.804102	up	4	0	7.11796	3.03553	24	22605756	22606492	-
3:79783236-79784463-	4.08242	7.03308	0.477685	0.804102	up	4	0	7.11796	3.03553	3	79783235	79784463	-
1:184542949-184543768-	4.08242	7.03308	0.477685	0.804102	up	4	0	7.11796	3.03553	1	184542948	184543768	-
9:22140113-22142132-	4.08242	7.03308	0.477685	0.804102	up	4	0	7.11796	3.03553	9	22140112	22142132	-
17:45768529-45779824-	4.08242	7.03308	0.477685	0.804102	up	4	0	7.11796	3.03553	17	45768528	45779824	-
2:38065237-38065927-	4.08242	7.03308	0.477685	0.804102	up	4	0	7.11796	3.03553	2	38065236	38065927	-
12:30584801-30589206+	4.08242	7.03308	0.477685	0.804102	up	4	0	7.11796	3.03553	12	30584800	30589206	+
15:75773900-75779173-	4.08242	7.03308	0.477685	0.804102	up	4	0	7.11796	3.03553	15	75773899	75779173	-
16:2915069-2971931+	4.08242	7.03308	0.477685	0.804102	up	4	0	7.11796	3.03553	16	2915068	2971931	+
1:100111596-100112627+	4.08242	7.03308	0.477685	0.804102	up	4	0	7.11796	3.03553	1	100111595	100112627	+
18:66945350-66963803+	4.08242	7.03308	0.477685	0.804102	up	4	0	7.11796	3.03553	18	66945349	66963803	+
1:36599484-36623085-	4.08242	7.03308	0.477685	0.804102	up	4	0	7.11796	3.03553	1	36599483	36623085	-
5:13220442-13222887+	4.08242	7.03308	0.477685	0.804102	up	4	0	7.11796	3.03553	5	13220441	13222887	+
11:60212156-60222339+	4.08242	7.03308	0.477685	0.804102	up	4	0	7.11796	3.03553	11	60212155	60222339	+
1:201219105-201219384+	4.08242	7.03308	0.477685	0.804102	up	4	0	7.11796	3.03553	1	201219104	201219384	+
8:73662898-73665322+	4.08242	7.03308	0.477685	0.804102	up	4	0	7.11796	3.03553	8	73662897	73665322	+
14:21221215-21230394+	4.08242	7.03308	0.477685	0.804102	up	4	0	7.11796	3.03553	14	21221214	21230394	+
16:31189804-31192769-	4.08242	7.03308	0.477685	0.804102	up	4	0	7.11796	3.03553	16	31189803	31192769	-
11:17565532-17570123-	4.08242	7.03308	0.477685	0.804102	up	4	0	7.11796	3.03553	11	17565531	17570123	-
14:42498302-42505958+	4.08242	7.03308	0.477685	0.804102	up	4	0	7.11796	3.03553	14	42498301	42505958	+
1:69018412-69043818-	4.08242	7.03308	0.477685	0.804102	up	4	0	7.11796	3.03553	1	69018411	69043818	-
16:6759704-6776198+	4.08242	7.03308	0.477685	0.804102	up	4	0	7.11796	3.03553	16	6759703	6776198	+
15:35689458-35724117+	4.08242	7.03308	0.477685	0.804102	up	4	0	7.11796	3.03553	15	35689457	35724117	+
14:52645525-52646868+	4.08242	7.03308	0.477685	0.804102	up	4	0	7.11796	3.03553	14	52645524	52646868	+
1:257065284-257068039-	4.08242	7.03308	0.477685	0.804102	up	4	0	7.11796	3.03553	1	257065283	257068039	-
8:27836393-27847931+	4.08242	7.03308	0.477685	0.804102	up	4	0	7.11796	3.03553	8	27836392	27847931	+
3:57236261-57236531+	4.08242	7.03308	0.477685	0.804102	up	4	0	7.11796	3.03553	3	57236260	57236531	+
1:128723340-128723818-	4.08242	7.03308	0.477685	0.804102	up	4	0	7.11796	3.03553	1	128723339	128723818	-
21:40276287-40277238-	4.08242	7.03308	0.477685	0.804102	up	4	0	7.11796	3.03553	21	40276286	40277238	-
24:29801369-29801699-	4.08242	7.03308	0.477685	0.804102	up	4	0	7.11796	3.03553	24	29801368	29801699	-
1:161618862-161636922-	4.08242	7.03308	0.477685	0.804102	up	4	0	7.11796	3.03553	1	161618861	161636922	-
23:32656398-32750841+	4.08242	7.03308	0.477685	0.804102	up	4	0	7.11796	3.03553	23	32656397	32750841	+
16:18034703-18036106+	4.08242	7.03308	0.477685	0.804102	up	4	0	7.11796	3.03553	16	18034702	18036106	+
3:46723294-46726740+	4.08242	7.03308	0.477685	0.804102	up	4	0	7.11796	3.03553	3	46723293	46726740	+
21:35588283-35601980-	4.08242	7.03308	0.477685	0.804102	up	4	0	7.11796	3.03553	21	35588282	35601980	-
X:110162527-110185927+	4.08242	7.03308	0.477685	0.804102	up	4	0	7.11796	3.03553	X	110162526	110185927	+
X:28070862-28077326-	4.08242	7.03308	0.477685	0.804102	up	4	0	7.11796	3.03553	X	28070861	28077326	-
15:42402236-42412643+	4.08242	7.03308	0.477685	0.804102	up	4	0	7.11796	3.03553	15	42402235	42412643	+
9:77756967-77839371-	4.08242	7.03308	0.477685	0.804102	up	4	0	7.11796	3.03553	9	77756966	77839371	-
2:41984783-41987261+	4.08242	7.03308	0.477685	0.804102	up	4	0	7.11796	3.03553	2	41984782	41987261	+
4:116540425-116540666+	4.08242	7.03308	0.477685	0.804102	up	4	0	7.11796	3.03553	4	116540424	116540666	+
4:10573158-10599146+	4.08242	7.03308	0.477685	0.804102	up	4	0	7.11796	3.03553	4	10573157	10599146	+
26:18216687-18225918+	4.08242	7.03308	0.477685	0.804102	up	4	0	7.11796	3.03553	26	18216686	18225918	+
12:66151582-66159353+	4.08242	7.03308	0.477685	0.804102	up	4	0	7.11796	3.03553	12	66151581	66159353	+
JH923092.1:6794-7505+	4.08242	7.03308	0.477685	0.804102	up	4	0	7.11796	3.03553	JH923092.1	6793	7505	+
7:42696317-42697574-	4.08242	7.03308	0.477685	0.804102	up	4	0	7.11796	3.03553	7	42696316	42697574	-
18:6009429-6029928-	4.08242	7.03308	0.477685	0.804102	up	4	0	7.11796	3.03553	18	6009428	6029928	-
18:32317849-32323103+	4.08242	7.03308	0.477685	0.804102	up	4	0	7.11796	3.03553	18	32317848	32323103	+
25:29118799-29134583+	4.08242	7.03308	0.477685	0.804102	up	4	0	7.11796	3.03553	25	29118798	29134583	+
1:124964734-124979133-	4.08242	7.03308	0.477685	0.804102	up	4	0	7.11796	3.03553	1	124964733	124979133	-
2:103531098-103547327-	4.08242	7.03308	0.477685	0.804102	up	4	0	7.11796	3.03553	2	103531097	103547327	-
6:11966961-11970029+	4.08242	7.03308	0.477685	0.804102	up	4	0	7.11796	3.03553	6	11966960	11970029	+
6:96894782-96899893-	4.08242	7.03308	0.477685	0.804102	up	4	0	7.11796	3.03553	6	96894781	96899893	-
9:82441627-82445627+	4.08242	7.03308	0.477685	0.804102	up	4	0	7.11796	3.03553	9	82441626	82445627	+
11:4827113-4875461+	4.08242	7.03308	0.477685	0.804102	up	4	0	7.11796	3.03553	11	4827112	4875461	+
3:68371983-68388160+	4.08242	7.03308	0.477685	0.804102	up	4	0	7.11796	3.03553	3	68371982	68388160	+
12:42977201-42977431-	4.08242	7.03308	0.477685	0.804102	up	4	0	7.11796	3.03553	12	42977200	42977431	-
14:61980664-61981941-	4.08242	7.03308	0.477685	0.804102	up	4	0	7.11796	3.03553	14	61980663	61981941	-
22:20263702-20277356-	4.08242	7.03308	0.477685	0.804102	up	4	0	7.11796	3.03553	22	20263701	20277356	-
7:45168911-45185858+	4.08242	7.03308	0.477685	0.804102	up	4	0	7.11796	3.03553	7	45168910	45185858	+
2:35876071-35877973+	4.08242	7.03308	0.477685	0.804102	up	4	0	7.11796	3.03553	2	35876070	35877973	+
18:43849695-43855839-	4.08242	7.03308	0.477685	0.804102	up	4	0	7.11796	3.03553	18	43849694	43855839	-
10:75595953-75596923+	4.08242	7.03308	0.477685	0.804102	up	4	0	7.11796	3.03553	10	75595952	75596923	+
7:12159529-12163211-	4.08242	7.03308	0.477685	0.804102	up	4	0	7.11796	3.03553	7	12159528	12163211	-
20:38728313-38734433+	4.08242	7.03308	0.477685	0.804102	up	4	0	7.11796	3.03553	20	38728312	38734433	+
3:84842596-84848592+	4.08242	7.03308	0.477685	0.804102	up	4	0	7.11796	3.03553	3	84842595	84848592	+
1:127606621-127634477+	4.08242	7.03308	0.477685	0.804102	up	4	0	7.11796	3.03553	1	127606620	127634477	+
2:138530506-138543922-	4.08242	7.03308	0.477685	0.804102	up	4	0	7.11796	3.03553	2	138530505	138543922	-
20:3197262-3222670-	4.08242	7.03308	0.477685	0.804102	up	4	0	7.11796	3.03553	20	3197261	3222670	-
1:201468159-201491792+	4.08242	7.03308	0.477685	0.804102	up	4	0	7.11796	3.03553	1	201468158	201491792	+
3:38056862-38063757+	4.08242	7.03308	0.477685	0.804102	up	4	0	7.11796	3.03553	3	38056861	38063757	+
19:5218275-5299616-	4.08242	7.03308	0.477685	0.804102	up	4	0	7.11796	3.03553	19	5218274	5299616	-
1:121243548-121257125-	4.08242	7.03308	0.477685	0.804102	up	4	0	7.11796	3.03553	1	121243547	121257125	-
19:28289260-28289973+	4.08242	7.03308	0.477685	0.804102	up	4	0	7.11796	3.03553	19	28289259	28289973	+
7:99381429-99434327-	4.08242	7.03308	0.477685	0.804102	up	4	0	7.11796	3.03553	7	99381428	99434327	-
3:115491778-115496784-	4.08242	7.03308	0.477685	0.804102	up	4	0	7.11796	3.03553	3	115491777	115496784	-
23:56440433-56455279+	4.08242	7.03308	0.477685	0.804102	up	4	0	7.11796	3.03553	23	56440432	56455279	+
15:64769643-64790677+	4.08242	7.03308	0.477685	0.804102	up	4	0	7.11796	3.03553	15	64769642	64790677	+
19:50909456-50909889-	4.08242	7.03308	0.477685	0.804102	up	4	0	7.11796	3.03553	19	50909455	50909889	-
23:25368439-25379553-	4.08242	7.03308	0.477685	0.804102	up	4	0	7.11796	3.03553	23	25368438	25379553	-
1:45594256-45596890-	4.08242	7.03308	0.477685	0.804102	up	4	0	7.11796	3.03553	1	45594255	45596890	-
1:235511403-235525155+	4.08242	7.03308	0.477685	0.804102	up	4	0	7.11796	3.03553	1	235511402	235525155	+
3:216921175-216921382-	4.08242	7.03308	0.477685	0.804102	up	4	0	7.11796	3.03553	3	216921174	216921382	-
12:63957160-64024270-	4.08242	7.03308	0.477685	0.804102	up	4	0	7.11796	3.03553	12	63957159	64024270	-
21:46655308-46656285+	4.08242	7.03308	0.477685	0.804102	up	4	0	7.11796	3.03553	21	46655307	46656285	+
7:76609192-76621402+	4.08242	7.03308	0.477685	0.804102	up	4	0	7.11796	3.03553	7	76609191	76621402	+
13:3332763-3342183+	4.08242	7.03308	0.477685	0.804102	up	4	0	7.11796	3.03553	13	3332762	3342183	+
9:13573113-13573400+	4.08242	7.03308	0.477685	0.804102	up	4	0	7.11796	3.03553	9	13573112	13573400	+
1:175499838-175500060-	4.08242	7.03308	0.477685	0.804102	up	4	0	7.11796	3.03553	1	175499837	175500060	-
2:147429323-147432072-	4.08242	7.03308	0.477685	0.804102	up	4	0	7.11796	3.03553	2	147429322	147432072	-
1:205595257-205595413+	4.08242	7.03308	0.477685	0.804102	up	4	0	7.11796	3.03553	1	205595256	205595413	+
2:61288333-61291773+	4.08242	7.03308	0.477685	0.804102	up	4	0	7.11796	3.03553	2	61288332	61291773	+
4:97821867-97845677+	4.08242	7.03308	0.477685	0.804102	up	4	0	7.11796	3.03553	4	97821866	97845677	+
12:63107971-63118902-	4.08242	7.03308	0.477685	0.804102	up	4	0	7.11796	3.03553	12	63107970	63118902	-
2:240266356-240266532-	4.08242	7.03308	0.477685	0.804102	up	4	0	7.11796	3.03553	2	240266355	240266532	-
25:19368344-19368508-	4.08242	7.03308	0.477685	0.804102	up	4	0	7.11796	3.03553	25	19368343	19368508	-
22:38746275-38746728+	4.08242	7.03308	0.477685	0.804102	up	4	0	7.11796	3.03553	22	38746274	38746728	+
7:56622373-56627607+	4.08242	7.03308	0.477685	0.804102	up	4	0	7.11796	3.03553	7	56622372	56627607	+
13:47036825-47036996-	4.08242	7.03308	0.477685	0.804102	up	4	0	7.11796	3.03553	13	47036824	47036996	-
19:51913519-51930418+	4.08242	7.03308	0.477685	0.804102	up	4	0	7.11796	3.03553	19	51913518	51930418	+
23:55104242-55106061+	4.08242	7.03308	0.477685	0.804102	up	4	0	7.11796	3.03553	23	55104241	55106061	+
13:16731651-16754570-	4.08242	7.03308	0.477685	0.804102	up	4	0	7.11796	3.03553	13	16731650	16754570	-
5:47632459-47633322+	4.08242	7.03308	0.477685	0.804102	up	4	0	7.11796	3.03553	5	47632458	47633322	+
23:37338238-37341592+	4.08242	7.03308	0.477685	0.804102	up	4	0	7.11796	3.03553	23	37338237	37341592	+
1:147814766-147824009-	4.08242	7.03308	0.477685	0.804102	up	4	0	7.11796	3.03553	1	147814765	147824009	-
1:111334655-111338957+	4.08242	7.03308	0.477685	0.804102	up	4	0	7.11796	3.03553	1	111334654	111338957	+
X:89513597-89513778-	4.08242	7.03308	0.477685	0.804102	up	4	0	7.11796	3.03553	X	89513596	89513778	-
X:11197256-11198021+	4.08242	7.03308	0.477685	0.804102	up	4	0	7.11796	3.03553	X	11197255	11198021	+
2:156890543-156899397-	4.08242	7.03308	0.477685	0.804102	up	4	0	7.11796	3.03553	2	156890542	156899397	-
21:49326778-49332179-	4.08242	7.03308	0.477685	0.804102	up	4	0	7.11796	3.03553	21	49326777	49332179	-
9:42153702-42154108+	4.08242	7.03308	0.477685	0.804102	up	4	0	7.11796	3.03553	9	42153701	42154108	+
6:105122651-105127390-	4.08242	7.03308	0.477685	0.804102	up	4	0	7.11796	3.03553	6	105122650	105127390	-
1:100269264-100272196-	4.08242	7.03308	0.477685	0.804102	up	4	0	7.11796	3.03553	1	100269263	100272196	-
3:68987222-69002205-	4.08242	7.03308	0.477685	0.804102	up	4	0	7.11796	3.03553	3	68987221	69002205	-
3:156756862-156762324+	4.08242	7.03308	0.477685	0.804102	up	4	0	7.11796	3.03553	3	156756861	156762324	+
4:30591278-30592923+	4.08242	7.03308	0.477685	0.804102	up	4	0	7.11796	3.03553	4	30591277	30592923	+
25:43217301-43218683-	4.08242	7.03308	0.477685	0.804102	up	4	0	7.11796	3.03553	25	43217300	43218683	-
17:32014272-32015466-	4.08242	7.03308	0.477685	0.804102	up	4	0	7.11796	3.03553	17	32014271	32015466	-
17:40120875-40122502-	4.08242	7.03308	0.477685	0.804102	up	4	0	7.11796	3.03553	17	40120874	40122502	-
2:50609723-50610494+	4.08242	7.03308	0.477685	0.804102	up	4	0	7.11796	3.03553	2	50609722	50610494	+
4:48578683-48578906-	4.08242	7.03308	0.477685	0.804102	up	4	0	7.11796	3.03553	4	48578682	48578906	-
11:10137515-10137742-	4.08242	7.03308	0.477685	0.804102	up	4	0	7.11796	3.03553	11	10137514	10137742	-
9:4826026-4826408+	4.08242	7.03308	0.477685	0.804102	up	4	0	7.11796	3.03553	9	4826025	4826408	+
5:602373-604479+	4.08242	7.03308	0.477685	0.804102	up	4	0	7.11796	3.03553	5	602372	604479	+
9:60508126-60511349+	4.08242	7.03308	0.477685	0.804102	up	4	0	7.11796	3.03553	9	60508125	60511349	+
8:63719166-63724814-	4.08242	7.03308	0.477685	0.804102	up	4	0	7.11796	3.03553	8	63719165	63724814	-
16:41863865-41869060-	4.08242	7.03308	0.477685	0.804102	up	4	0	7.11796	3.03553	16	41863864	41869060	-
26:5170522-5174816+	4.08242	7.03308	0.477685	0.804102	up	4	0	7.11796	3.03553	26	5170521	5174816	+
23:37501058-37512676-	4.08242	7.03308	0.477685	0.804102	up	4	0	7.11796	3.03553	23	37501057	37512676	-
10:28586552-28607604-	4.08242	7.03308	0.477685	0.804102	up	4	0	7.11796	3.03553	10	28586551	28607604	-
12:56282171-56292358-	4.08242	7.03308	0.477685	0.804102	up	4	0	7.11796	3.03553	12	56282170	56292358	-
3:86920370-86982927+	4.08242	7.03308	0.477685	0.804102	up	4	0	7.11796	3.03553	3	86920369	86982927	+
18:23634958-23635611+	4.08242	7.03308	0.477685	0.804102	up	4	0	7.11796	3.03553	18	23634957	23635611	+
1:29283439-29294289-	4.08242	7.03308	0.477685	0.804102	up	4	0	7.11796	3.03553	1	29283438	29294289	-
10:36468779-36477501+	4.08242	7.03308	0.477685	0.804102	up	4	0	7.11796	3.03553	10	36468778	36477501	+
X:64440008-64457961-	4.08242	7.03308	0.477685	0.804102	up	4	0	7.11796	3.03553	X	64440007	64457961	-
5:63666519-63667688+	4.08242	7.03308	0.477685	0.804102	up	4	0	7.11796	3.03553	5	63666518	63667688	+
1:261814485-261816377-	4.08242	7.03308	0.477685	0.804102	up	4	0	7.11796	3.03553	1	261814484	261816377	-
7:39449514-39450443-	4.08242	7.03308	0.477685	0.804102	up	4	0	7.11796	3.03553	7	39449513	39450443	-
2:75864794-75869020-	4.08242	7.03308	0.477685	0.804102	up	4	0	7.11796	3.03553	2	75864793	75869020	-
2:209284583-209286496+	4.08242	7.03308	0.477685	0.804102	up	4	0	7.11796	3.03553	2	209284582	209286496	+
X:12983034-12996365+	4.08242	7.03308	0.477685	0.804102	up	4	0	7.11796	3.03553	X	12983033	12996365	+
4:97938976-97952139-	4.08242	7.03308	0.477685	0.804102	up	4	0	7.11796	3.03553	4	97938975	97952139	-
25:28763479-28776846+	4.08242	7.03308	0.477685	0.804102	up	4	0	7.11796	3.03553	25	28763478	28776846	+
17:16514384-16516700+	4.08242	7.03308	0.477685	0.804102	up	4	0	7.11796	3.03553	17	16514383	16516700	+
2:191552916-191555318-	4.08242	7.03308	0.477685	0.804102	up	4	0	7.11796	3.03553	2	191552915	191555318	-
3:163300650-163301021-	4.08242	7.03308	0.477685	0.804102	up	4	0	7.11796	3.03553	3	163300649	163301021	-
21:40265350-40265673-	4.08242	7.03308	0.477685	0.804102	up	4	0	7.11796	3.03553	21	40265349	40265673	-
22:22438397-22447793+	4.08242	7.03308	0.477685	0.804102	up	4	0	7.11796	3.03553	22	22438396	22447793	+
4:93546336-93572326+	4.08242	7.03308	0.477685	0.804102	up	4	0	7.11796	3.03553	4	93546335	93572326	+
3:41677741-41678075+	4.08242	7.03308	0.477685	0.804102	up	4	0	7.11796	3.03553	3	41677740	41678075	+
13:38610062-38610561+	4.08242	7.03308	0.477685	0.804102	up	4	0	7.11796	3.03553	13	38610061	38610561	+
4:97142788-97152205+	4.08242	7.03308	0.477685	0.804102	up	4	0	7.11796	3.03553	4	97142787	97152205	+
3:211897370-211932837+	4.08242	7.03308	0.477685	0.804102	up	4	0	7.11796	3.03553	3	211897369	211932837	+
10:28672071-28672325-	4.08242	7.03308	0.477685	0.804102	up	4	0	7.11796	3.03553	10	28672070	28672325	-
13:80369643-80369819-	4.08242	7.03308	0.477685	0.804102	up	4	0	7.11796	3.03553	13	80369642	80369819	-
11:35222393-35264298+	4.08242	7.03308	0.477685	0.804102	up	4	0	7.11796	3.03553	11	35222392	35264298	+
10:55103486-55116709+	4.08242	7.03308	0.477685	0.804102	up	4	0	7.11796	3.03553	10	55103485	55116709	+
12:64365198-64367307-	4.08242	7.03308	0.477685	0.804102	up	4	0	7.11796	3.03553	12	64365197	64367307	-
3:43095642-43107793+	4.08242	7.03308	0.477685	0.804102	up	4	0	7.11796	3.03553	3	43095641	43107793	+
3:16738536-16748799+	4.08242	7.03308	0.477685	0.804102	up	4	0	7.11796	3.03553	3	16738535	16748799	+
1:141282356-141292729-	4.08242	7.03308	0.477685	0.804102	up	4	0	7.11796	3.03553	1	141282355	141292729	-
12:35759580-35811814-	4.08242	7.03308	0.477685	0.804102	up	4	0	7.11796	3.03553	12	35759579	35811814	-
3:91418765-91422720-	4.08242	7.03308	0.477685	0.804102	up	4	0	7.11796	3.03553	3	91418764	91422720	-
7:34171227-34176530+	4.08242	7.03308	0.477685	0.804102	up	4	0	7.11796	3.03553	7	34171226	34176530	+
2:231530699-231531828+	4.08242	7.03308	0.477685	0.804102	up	4	0	7.11796	3.03553	2	231530698	231531828	+
12:32114919-32115082+	4.08242	7.03308	0.477685	0.804102	up	4	0	7.11796	3.03553	12	32114918	32115082	+
13:1861515-1877863+	4.08242	7.03308	0.477685	0.804102	up	4	0	7.11796	3.03553	13	1861514	1877863	+
8:75857273-75864398-	4.08242	7.03308	0.477685	0.804102	up	4	0	7.11796	3.03553	8	75857272	75864398	-
16:6800247-6804506+	4.08242	7.03308	0.477685	0.804102	up	4	0	7.11796	3.03553	16	6800246	6804506	+
3:90596658-90647874-	4.08242	7.03308	0.477685	0.804102	up	4	0	7.11796	3.03553	3	90596657	90647874	-
7:73622876-73627944+	4.08242	7.03308	0.477685	0.804102	up	4	0	7.11796	3.03553	7	73622875	73627944	+
X:67987719-67989485-	4.08242	7.03308	0.477685	0.804102	up	4	0	7.11796	3.03553	X	67987718	67989485	-
X:94218518-94224525-	4.08242	7.03308	0.477685	0.804102	up	4	0	7.11796	3.03553	X	94218517	94224525	-
6:83181651-83197248-	4.08242	7.03308	0.477685	0.804102	up	4	0	7.11796	3.03553	6	83181650	83197248	-
1:211342252-211342730+	4.08242	7.03308	0.477685	0.804102	up	4	0	7.11796	3.03553	1	211342251	211342730	+
3:220092958-220099671+	4.08242	7.03308	0.477685	0.804102	up	4	0	7.11796	3.03553	3	220092957	220099671	+
8:68793101-68799000+	4.08242	7.03308	0.477685	0.804102	up	4	0	7.11796	3.03553	8	68793100	68799000	+
15:60128488-60139122-	4.08242	7.03308	0.477685	0.804102	up	4	0	7.11796	3.03553	15	60128487	60139122	-
1:245460544-245466240-	4.08242	7.03308	0.477685	0.804102	up	4	0	7.11796	3.03553	1	245460543	245466240	-
24:27009823-27052791+	4.08242	7.03308	0.477685	0.804102	up	4	0	7.11796	3.03553	24	27009822	27052791	+
X:110637650-110639640-	4.08242	7.03308	0.477685	0.804102	up	4	0	7.11796	3.03553	X	110637649	110639640	-
13:37369886-37376873+	4.08242	7.03308	0.477685	0.804102	up	4	0	7.11796	3.03553	13	37369885	37376873	+
20:30010779-30011885-	4.08242	7.03308	0.477685	0.804102	up	4	0	7.11796	3.03553	20	30010778	30011885	-
1:257467184-257468617-	4.08242	7.03308	0.477685	0.804102	up	4	0	7.11796	3.03553	1	257467183	257468617	-
5:65458939-65459190-	4.08242	7.03308	0.477685	0.804102	up	4	0	7.11796	3.03553	5	65458938	65459190	-
10:76994005-77013736-	4.08242	7.03308	0.477685	0.804102	up	4	0	7.11796	3.03553	10	76994004	77013736	-
5:51498533-51502124+	4.08242	7.03308	0.477685	0.804102	up	4	0	7.11796	3.03553	5	51498532	51502124	+
1:16499323-16522982-	4.08242	7.03308	0.477685	0.804102	up	4	0	7.11796	3.03553	1	16499322	16522982	-
25:26441638-26444273-	4.08242	7.03308	0.477685	0.804102	up	4	0	7.11796	3.03553	25	26441637	26444273	-
21:513618-521179-	4.08242	7.03308	0.477685	0.804102	up	4	0	7.11796	3.03553	21	513617	521179	-
1:215618571-215618919-	4.08242	7.03308	0.477685	0.804102	up	4	0	7.11796	3.03553	1	215618570	215618919	-
23:40344725-40365277-	4.08242	7.03308	0.477685	0.804102	up	4	0	7.11796	3.03553	23	40344724	40365277	-
3:221050511-221053161+	4.08242	7.03308	0.477685	0.804102	up	4	0	7.11796	3.03553	3	221050510	221053161	+
21:42989038-42989639+	4.08242	7.03308	0.477685	0.804102	up	4	0	7.11796	3.03553	21	42989037	42989639	+
15:35191599-35206143+	4.08242	7.03308	0.477685	0.804102	up	4	0	7.11796	3.03553	15	35191598	35206143	+
25:28744233-28776846+	4.08242	7.03308	0.477685	0.804102	up	4	0	7.11796	3.03553	25	28744232	28776846	+
9:49849490-49881583-	4.08242	7.03308	0.477685	0.804102	up	4	0	7.11796	3.03553	9	49849489	49881583	-
4:88023495-88031409-	4.08242	7.03308	0.477685	0.804102	up	4	0	7.11796	3.03553	4	88023494	88031409	-
7:17897196-17946935+	4.08242	7.03308	0.477685	0.804102	up	4	0	7.11796	3.03553	7	17897195	17946935	+
3:12498236-12509390+	4.08242	7.03308	0.477685	0.804102	up	4	0	7.11796	3.03553	3	12498235	12509390	+
8:80439677-80463045+	4.08242	7.03308	0.477685	0.804102	up	4	0	7.11796	3.03553	8	80439676	80463045	+
8:75905086-75905544+	4.08242	7.03308	0.477685	0.804102	up	4	0	7.11796	3.03553	8	75905085	75905544	+
4:38481692-38522975+	4.08242	7.03308	0.477685	0.804102	up	4	0	7.11796	3.03553	4	38481691	38522975	+
1:69018412-69027516-	4.08242	7.03308	0.477685	0.804102	up	4	0	7.11796	3.03553	1	69018411	69027516	-
3:112556752-112587582+	4.08242	7.03308	0.477685	0.804102	up	4	0	7.11796	3.03553	3	112556751	112587582	+
15:41441154-41441365+	4.08242	7.03308	0.477685	0.804102	up	4	0	7.11796	3.03553	15	41441153	41441365	+
15:74873015-74892287+	4.08242	7.03308	0.477685	0.804102	up	4	0	7.11796	3.03553	15	74873014	74892287	+
1:128891899-128913904-	4.08242	7.03308	0.477685	0.804102	up	4	0	7.11796	3.03553	1	128891898	128913904	-
17:68330790-68336870+	4.08242	7.03308	0.477685	0.804102	up	4	0	7.11796	3.03553	17	68330789	68336870	+
3:117059119-117068759+	4.08242	7.03308	0.477685	0.804102	up	4	0	7.11796	3.03553	3	117059118	117068759	+
4:26460689-26472324-	4.08242	7.03308	0.477685	0.804102	up	4	0	7.11796	3.03553	4	26460688	26472324	-
25:29320296-29337645-	4.08242	7.03308	0.477685	0.804102	up	4	0	7.11796	3.03553	25	29320295	29337645	-
24:10438215-10438748+	4.08242	7.03308	0.477685	0.804102	up	4	0	7.11796	3.03553	24	10438214	10438748	+
X:62856323-62890820-	4.08242	7.03308	0.477685	0.804102	up	4	0	7.11796	3.03553	X	62856322	62890820	-
21:45298574-45308415+	4.08242	7.03308	0.477685	0.804102	up	4	0	7.11796	3.03553	21	45298573	45308415	+
8:80358153-80386532+	4.08242	7.03308	0.477685	0.804102	up	4	0	7.11796	3.03553	8	80358152	80386532	+
3:87528277-87580342-	4.08242	7.03308	0.477685	0.804102	up	4	0	7.11796	3.03553	3	87528276	87580342	-
14:25752508-25752689+	4.08242	7.03308	0.477685	0.804102	up	4	0	7.11796	3.03553	14	25752507	25752689	+
12:30584801-30587638+	4.08242	7.03308	0.477685	0.804102	up	4	0	7.11796	3.03553	12	30584800	30587638	+
1:68757846-68760297+	4.08242	7.03308	0.477685	0.804102	up	4	0	7.11796	3.03553	1	68757845	68760297	+
14:54322541-54322699+	4.08242	7.03308	0.477685	0.804102	up	4	0	7.11796	3.03553	14	54322540	54322699	+
24:27603569-27613536+	4.08242	7.03308	0.477685	0.804102	up	4	0	7.11796	3.03553	24	27603568	27613536	+
14:33621683-33626730-	4.08242	7.03308	0.477685	0.804102	up	4	0	7.11796	3.03553	14	33621682	33626730	-
14:34988789-34989345+	4.08242	7.03308	0.477685	0.804102	up	4	0	7.11796	3.03553	14	34988788	34989345	+
5:59401435-59403504+	4.08242	7.03308	0.477685	0.804102	up	4	0	7.11796	3.03553	5	59401434	59403504	+
2:12488860-12489301+	4.08242	7.03308	0.477685	0.804102	up	4	0	7.11796	3.03553	2	12488859	12489301	+
3:188190673-188198671+	4.08242	7.03308	0.477685	0.804102	up	4	0	7.11796	3.03553	3	188190672	188198671	+
16:16885250-16914637-	4.08242	7.03308	0.477685	0.804102	up	4	0	7.11796	3.03553	16	16885249	16914637	-
8:32261167-32275775+	4.08242	7.03308	0.477685	0.804102	up	4	0	7.11796	3.03553	8	32261166	32275775	+
12:65232197-65237739+	4.08242	7.03308	0.477685	0.804102	up	4	0	7.11796	3.03553	12	65232196	65237739	+
19:30557289-30562583+	4.08242	7.03308	0.477685	0.804102	up	4	0	7.11796	3.03553	19	30557288	30562583	+
8:1839584-1840275-	4.08242	7.03308	0.477685	0.804102	up	4	0	7.11796	3.03553	8	1839583	1840275	-
3:127388121-127388474+	4.08242	7.03308	0.477685	0.804102	up	4	0	7.11796	3.03553	3	127388120	127388474	+
8:53743020-53743256+	4.08242	7.03308	0.477685	0.804102	up	4	0	7.11796	3.03553	8	53743019	53743256	+
3:12663170-12713899-	4.08242	7.03308	0.477685	0.804102	up	4	0	7.11796	3.03553	3	12663169	12713899	-
3:91496147-91496502-	4.08242	7.03308	0.477685	0.804102	up	4	0	7.11796	3.03553	3	91496146	91496502	-
7:464248-467559+	4.08242	7.03308	0.477685	0.804102	up	4	0	7.11796	3.03553	7	464247	467559	+
3:166719932-166792525+	4.08242	7.03308	0.477685	0.804102	up	4	0	7.11796	3.03553	3	166719931	166792525	+
1:16499865-16501467-	4.08242	7.03308	0.477685	0.804102	up	4	0	7.11796	3.03553	1	16499864	16501467	-
10:74752274-74752754+	4.08242	7.03308	0.477685	0.804102	up	4	0	7.11796	3.03553	10	74752273	74752754	+
2:112571495-112583712-	4.08242	7.03308	0.477685	0.804102	up	4	0	7.11796	3.03553	2	112571494	112583712	-
9:43521693-43527167+	4.08242	7.03308	0.477685	0.804102	up	4	0	7.11796	3.03553	9	43521692	43527167	+
2:82906886-82948160-	4.08242	7.03308	0.477685	0.804102	up	4	0	7.11796	3.03553	2	82906885	82948160	-
1:10099998-10114068+	4.08242	7.03308	0.477685	0.804102	up	4	0	7.11796	3.03553	1	10099997	10114068	+
12:63865020-63870203-	4.08242	7.03308	0.477685	0.804102	up	4	0	7.11796	3.03553	12	63865019	63870203	-
23:61902645-61906966-	4.08242	7.03308	0.477685	0.804102	up	4	0	7.11796	3.03553	23	61902644	61906966	-
2:52013500-52027605+	4.08242	7.03308	0.477685	0.804102	up	4	0	7.11796	3.03553	2	52013499	52027605	+
JH923837.1:9375-16812+	4.08242	7.03308	0.477685	0.804102	up	4	0	7.11796	3.03553	JH923837.1	9374	16812	+
4:51799677-51800322-	4.08242	7.03308	0.477685	0.804102	up	4	0	7.11796	3.03553	4	51799676	51800322	-
3:151073625-151084232-	4.08242	7.03308	0.477685	0.804102	up	4	0	7.11796	3.03553	3	151073624	151084232	-
2:110415719-110429828+	4.08242	7.03308	0.477685	0.804102	up	4	0	7.11796	3.03553	2	110415718	110429828	+
11:25760863-25767372+	4.08242	7.03308	0.477685	0.804102	up	4	0	7.11796	3.03553	11	25760862	25767372	+
7:56626760-56627607+	4.08242	7.03308	0.477685	0.804102	up	4	0	7.11796	3.03553	7	56626759	56627607	+
17:53809189-53809652-	4.08242	7.03308	0.477685	0.804102	up	4	0	7.11796	3.03553	17	53809188	53809652	-
17:52748235-52751950+	4.08242	7.03308	0.477685	0.804102	up	4	0	7.11796	3.03553	17	52748234	52751950	+
21:24900320-24900849-	4.08242	7.03308	0.477685	0.804102	up	4	0	7.11796	3.03553	21	24900319	24900849	-
5:91306880-91336210+	4.08242	7.03308	0.477685	0.804102	up	4	0	7.11796	3.03553	5	91306879	91336210	+
9:22911531-22944649+	4.08242	7.03308	0.477685	0.804102	up	4	0	7.11796	3.03553	9	22911530	22944649	+
18:5461092-5461397-	4.08242	7.03308	0.477685	0.804102	up	4	0	7.11796	3.03553	18	5461091	5461397	-
2:74219055-74250371+	4.08242	7.03308	0.477685	0.804102	up	4	0	7.11796	3.03553	2	74219054	74250371	+
1:188550563-188561440-	4.08242	7.03308	0.477685	0.804102	up	4	0	7.11796	3.03553	1	188550562	188561440	-
19:1497639-1498410-	4.08242	7.03308	0.477685	0.804102	up	4	0	7.11796	3.03553	19	1497638	1498410	-
9:70552100-70552460+	4.08242	7.03308	0.477685	0.804102	up	4	0	7.11796	3.03553	9	70552099	70552460	+
21:5694691-5702093+	4.08242	7.03308	0.477685	0.804102	up	4	0	7.11796	3.03553	21	5694690	5702093	+
11:29881003-29890615+	4.08242	7.03308	0.477685	0.804102	up	4	0	7.11796	3.03553	11	29881002	29890615	+
12:39472808-39485291-	4.08242	7.03308	0.477685	0.804102	up	4	0	7.11796	3.03553	12	39472807	39485291	-
1:205555299-205565094-	4.08242	7.03308	0.477685	0.804102	up	4	0	7.11796	3.03553	1	205555298	205565094	-
22:34692367-34725859+	4.08242	7.03308	0.477685	0.804102	up	4	0	7.11796	3.03553	22	34692366	34725859	+
12:25659114-25675627-	4.08242	7.03308	0.477685	0.804102	up	4	0	7.11796	3.03553	12	25659113	25675627	-
19:29918949-29920675+	4.08242	7.03308	0.477685	0.804102	up	4	0	7.11796	3.03553	19	29918948	29920675	+
23:31820457-31857271+	3.6955	6.84081	0.566474	0.804102	up	3	0	6.73103	3.03553	23	31820456	31857271	+
X:108057390-108060344-	3.6955	6.84081	0.566474	0.804102	up	3	0	6.73103	3.03553	X	108057389	108060344	-
1:191336318-191345153+	3.6955	6.84081	0.566474	0.804102	up	3	0	6.73103	3.03553	1	191336317	191345153	+
3:125738834-125745439-	3.6955	6.84081	0.566474	0.804102	up	3	0	6.73103	3.03553	3	125738833	125745439	-
1:200611420-200612516-	3.6955	6.84081	0.566474	0.804102	up	3	0	6.73103	3.03553	1	200611419	200612516	-
3:13483817-13500238-	3.6955	6.84081	0.566474	0.804102	up	3	0	6.73103	3.03553	3	13483816	13500238	-
16:5661957-5709054+	3.6955	6.84081	0.566474	0.804102	up	3	0	6.73103	3.03553	16	5661956	5709054	+
1:28061939-28073197-	3.6955	6.84081	0.566474	0.804102	up	3	0	6.73103	3.03553	1	28061938	28073197	-
26:15211728-15213536-	3.6955	6.84081	0.566474	0.804102	up	3	0	6.73103	3.03553	26	15211727	15213536	-
12:42285087-42285237+	3.6955	6.84081	0.566474	0.804102	up	3	0	6.73103	3.03553	12	42285086	42285237	+
2:87218737-87226460+	3.6955	6.84081	0.566474	0.804102	up	3	0	6.73103	3.03553	2	87218736	87226460	+
19:57263366-57266919-	3.6955	6.84081	0.566474	0.804102	up	3	0	6.73103	3.03553	19	57263365	57266919	-
1:36599484-36607647-	3.6955	6.84081	0.566474	0.804102	up	3	0	6.73103	3.03553	1	36599483	36607647	-
25:15729657-15766171-	3.6955	6.84081	0.566474	0.804102	up	3	0	6.73103	3.03553	25	15729656	15766171	-
16:41386849-41387192-	3.6955	6.84081	0.566474	0.804102	up	3	0	6.73103	3.03553	16	41386848	41387192	-
X:89514394-89514616-	3.6955	6.84081	0.566474	0.804102	up	3	0	6.73103	3.03553	X	89514393	89514616	-
X:110845213-110885038-	3.6955	6.84081	0.566474	0.804102	up	3	0	6.73103	3.03553	X	110845212	110885038	-
21:40269892-40270275-	3.6955	6.84081	0.566474	0.804102	up	3	0	6.73103	3.03553	21	40269891	40270275	-
26:17987357-17988008-	3.6955	6.84081	0.566474	0.804102	up	3	0	6.73103	3.03553	26	17987356	17988008	-
23:870490-932013-	3.6955	6.84081	0.566474	0.804102	up	3	0	6.73103	3.03553	23	870489	932013	-
2:116375505-116375657+	3.6955	6.84081	0.566474	0.804102	up	3	0	6.73103	3.03553	2	116375504	116375657	+
21:8994286-9029932+	3.6955	6.84081	0.566474	0.804102	up	3	0	6.73103	3.03553	21	8994285	9029932	+
2:58553427-58576119+	3.6955	6.84081	0.566474	0.804102	up	3	0	6.73103	3.03553	2	58553426	58576119	+
15:50034614-50034906+	3.6955	6.84081	0.566474	0.804102	up	3	0	6.73103	3.03553	15	50034613	50034906	+
2:73919375-73922880+	3.6955	6.84081	0.566474	0.804102	up	3	0	6.73103	3.03553	2	73919374	73922880	+
3:198780639-198784341-	3.6955	6.84081	0.566474	0.804102	up	3	0	6.73103	3.03553	3	198780638	198784341	-
1:248490907-248498309+	3.6955	6.84081	0.566474	0.804102	up	3	0	6.73103	3.03553	1	248490906	248498309	+
3:90577359-90617456-	3.6955	6.84081	0.566474	0.804102	up	3	0	6.73103	3.03553	3	90577358	90617456	-
12:64946963-65019170+	3.6955	6.84081	0.566474	0.804102	up	3	0	6.73103	3.03553	12	64946962	65019170	+
15:44606309-44622789-	3.6955	6.84081	0.566474	0.804102	up	3	0	6.73103	3.03553	15	44606308	44622789	-
14:43953119-43953472-	3.6955	6.84081	0.566474	0.804102	up	3	0	6.73103	3.03553	14	43953118	43953472	-
4:48578683-48588137-	3.6955	6.84081	0.566474	0.804102	up	3	0	6.73103	3.03553	4	48578682	48588137	-
X:53977835-53991262+	3.6955	6.84081	0.566474	0.804102	up	3	0	6.73103	3.03553	X	53977834	53991262	+
9:82098055-82107033-	3.6955	6.84081	0.566474	0.804102	up	3	0	6.73103	3.03553	9	82098054	82107033	-
1:187131933-187157813+	3.6955	6.84081	0.566474	0.804102	up	3	0	6.73103	3.03553	1	187131932	187157813	+
3:34502396-34508383+	3.6955	6.84081	0.566474	0.804102	up	3	0	6.73103	3.03553	3	34502395	34508383	+
11:10280504-10291674+	3.6955	6.84081	0.566474	0.804102	up	3	0	6.73103	3.03553	11	10280503	10291674	+
3:102418875-102480572+	3.6955	6.84081	0.566474	0.804102	up	3	0	6.73103	3.03553	3	102418874	102480572	+
3:212099175-212099514-	3.6955	6.84081	0.566474	0.804102	up	3	0	6.73103	3.03553	3	212099174	212099514	-
24:21562900-21567248-	3.6955	6.84081	0.566474	0.804102	up	3	0	6.73103	3.03553	24	21562899	21567248	-
1:175083384-175095300+	3.6955	6.84081	0.566474	0.804102	up	3	0	6.73103	3.03553	1	175083383	175095300	+
1:103718159-103722806-	3.6955	6.84081	0.566474	0.804102	up	3	0	6.73103	3.03553	1	103718158	103722806	-
X:99246354-99266130-	3.6955	6.84081	0.566474	0.804102	up	3	0	6.73103	3.03553	X	99246353	99266130	-
25:25010404-25026105+	3.6955	6.84081	0.566474	0.804102	up	3	0	6.73103	3.03553	25	25010403	25026105	+
18:65591548-65591809-	3.6955	6.84081	0.566474	0.804102	up	3	0	6.73103	3.03553	18	65591547	65591809	-
2:128962779-128966166+	3.6955	6.84081	0.566474	0.804102	up	3	0	6.73103	3.03553	2	128962778	128966166	+
10:76311411-76313928+	3.6955	6.84081	0.566474	0.804102	up	3	0	6.73103	3.03553	10	76311410	76313928	+
11:61341489-61402228-	3.6955	6.84081	0.566474	0.804102	up	3	0	6.73103	3.03553	11	61341488	61402228	-
5:105988311-105998596-	3.6955	6.84081	0.566474	0.804102	up	3	0	6.73103	3.03553	5	105988310	105998596	-
1:168803517-168813460-	3.6955	6.84081	0.566474	0.804102	up	3	0	6.73103	3.03553	1	168803516	168813460	-
2:240135122-240138643-	3.6955	6.84081	0.566474	0.804102	up	3	0	6.73103	3.03553	2	240135121	240138643	-
2:46635756-46638278-	3.6955	6.84081	0.566474	0.804102	up	3	0	6.73103	3.03553	2	46635755	46638278	-
19:36585862-36586039+	3.6955	6.84081	0.566474	0.804102	up	3	0	6.73103	3.03553	19	36585861	36586039	+
13:63400939-63430777+	3.6955	6.84081	0.566474	0.804102	up	3	0	6.73103	3.03553	13	63400938	63430777	+
21:40263164-40263487-	3.6955	6.84081	0.566474	0.804102	up	3	0	6.73103	3.03553	21	40263163	40263487	-
9:72727177-72731421+	3.6955	6.84081	0.566474	0.804102	up	3	0	6.73103	3.03553	9	72727176	72731421	+
X:125622095-125623277+	3.6955	6.84081	0.566474	0.804102	up	3	0	6.73103	3.03553	X	125622094	125623277	+
9:74781241-74788548+	3.6955	6.84081	0.566474	0.804102	up	3	0	6.73103	3.03553	9	74781240	74788548	+
3:42867203-42878707+	3.6955	6.84081	0.566474	0.804102	up	3	0	6.73103	3.03553	3	42867202	42878707	+
17:15461352-15495136+	3.6955	6.84081	0.566474	0.804102	up	3	0	6.73103	3.03553	17	15461351	15495136	+
13:50746912-50748022+	3.6955	6.84081	0.566474	0.804102	up	3	0	6.73103	3.03553	13	50746911	50748022	+
23:34785093-34796736-	3.6955	6.84081	0.566474	0.804102	up	3	0	6.73103	3.03553	23	34785092	34796736	-
6:41918558-41946214-	3.6955	6.84081	0.566474	0.804102	up	3	0	6.73103	3.03553	6	41918557	41946214	-
18:25104527-25104829-	3.6955	6.84081	0.566474	0.804102	up	3	0	6.73103	3.03553	18	25104526	25104829	-
14:25770227-25773899-	3.6955	6.84081	0.566474	0.804102	up	3	0	6.73103	3.03553	14	25770226	25773899	-
2:30101327-30111788-	3.6955	6.84081	0.566474	0.804102	up	3	0	6.73103	3.03553	2	30101326	30111788	-
26:6522039-6522190+	3.6955	6.84081	0.566474	0.804102	up	3	0	6.73103	3.03553	26	6522038	6522190	+
4:8567252-8607253-	3.6955	6.84081	0.566474	0.804102	up	3	0	6.73103	3.03553	4	8567251	8607253	-
13:45589768-45594040+	3.6955	6.84081	0.566474	0.804102	up	3	0	6.73103	3.03553	13	45589767	45594040	+
15:15032087-15036150-	3.6955	6.84081	0.566474	0.804102	up	3	0	6.73103	3.03553	15	15032086	15036150	-
24:3143661-3158404-	3.6955	6.84081	0.566474	0.804102	up	3	0	6.73103	3.03553	24	3143660	3158404	-
11:61179477-61183955-	3.6955	6.84081	0.566474	0.804102	up	3	0	6.73103	3.03553	11	61179476	61183955	-
7:23136390-23139758+	3.6955	6.84081	0.566474	0.804102	up	3	0	6.73103	3.03553	7	23136389	23139758	+
13:65610581-65614626-	3.6955	6.84081	0.566474	0.804102	up	3	0	6.73103	3.03553	13	65610580	65614626	-
7:32681697-32688292+	3.6955	6.84081	0.566474	0.804102	up	3	0	6.73103	3.03553	7	32681696	32688292	+
6:97945678-97951962+	3.6955	6.84081	0.566474	0.804102	up	3	0	6.73103	3.03553	6	97945677	97951962	+
6:21934903-21937138+	3.6955	6.84081	0.566474	0.804102	up	3	0	6.73103	3.03553	6	21934902	21937138	+
5:92401666-92422936+	3.6955	6.84081	0.566474	0.804102	up	3	0	6.73103	3.03553	5	92401665	92422936	+
10:11854542-11860667+	3.6955	6.84081	0.566474	0.804102	up	3	0	6.73103	3.03553	10	11854541	11860667	+
7:18539570-18549144-	3.6955	6.84081	0.566474	0.804102	up	3	0	6.73103	3.03553	7	18539569	18549144	-
11:14734072-14745564+	3.6955	6.84081	0.566474	0.804102	up	3	0	6.73103	3.03553	11	14734071	14745564	+
3:107429769-107430349-	3.6955	6.84081	0.566474	0.804102	up	3	0	6.73103	3.03553	3	107429768	107430349	-
23:851670-851902-	3.6955	6.84081	0.566474	0.804102	up	3	0	6.73103	3.03553	23	851669	851902	-
6:29785635-29788375+	3.6955	6.84081	0.566474	0.804102	up	3	0	6.73103	3.03553	6	29785634	29788375	+
17:70932385-70941117-	3.6955	6.84081	0.566474	0.804102	up	3	0	6.73103	3.03553	17	70932384	70941117	-
2:88630133-88633771+	3.6955	6.84081	0.566474	0.804102	up	3	0	6.73103	3.03553	2	88630132	88633771	+
8:80375-80675+	3.6955	6.84081	0.566474	0.804102	up	3	0	6.73103	3.03553	8	80374	80675	+
2:39968805-39969908+	3.6955	6.84081	0.566474	0.804102	up	3	0	6.73103	3.03553	2	39968804	39969908	+
1:168728037-168737598-	3.6955	6.84081	0.566474	0.804102	up	3	0	6.73103	3.03553	1	168728036	168737598	-
26:25775469-25776583+	3.6955	6.84081	0.566474	0.804102	up	3	0	6.73103	3.03553	26	25775468	25776583	+
X:94754637-94756434+	3.6955	6.84081	0.566474	0.804102	up	3	0	6.73103	3.03553	X	94754636	94756434	+
4:74927608-74941571+	3.6955	6.84081	0.566474	0.804102	up	3	0	6.73103	3.03553	4	74927607	74941571	+
X:12790970-12792058+	3.6955	6.84081	0.566474	0.804102	up	3	0	6.73103	3.03553	X	12790969	12792058	+
26:14597009-14602125+	3.6955	6.84081	0.566474	0.804102	up	3	0	6.73103	3.03553	26	14597008	14602125	+
2:102433907-102460293-	3.6955	6.84081	0.566474	0.804102	up	3	0	6.73103	3.03553	2	102433906	102460293	-
2:38151553-38155549-	3.6955	6.84081	0.566474	0.804102	up	3	0	6.73103	3.03553	2	38151552	38155549	-
11:44902757-44906223-	3.6955	6.84081	0.566474	0.804102	up	3	0	6.73103	3.03553	11	44902756	44906223	-
16:7797897-7806184-	3.6955	6.84081	0.566474	0.804102	up	3	0	6.73103	3.03553	16	7797896	7806184	-
12:21761939-21762295-	3.6955	6.84081	0.566474	0.804102	up	3	0	6.73103	3.03553	12	21761938	21762295	-
X:64075551-64087259+	3.6955	6.84081	0.566474	0.804102	up	3	0	6.73103	3.03553	X	64075550	64087259	+
18:33220858-33225160+	3.6955	6.84081	0.566474	0.804102	up	3	0	6.73103	3.03553	18	33220857	33225160	+
18:39179695-39190590-	3.6955	6.84081	0.566474	0.804102	up	3	0	6.73103	3.03553	18	39179694	39190590	-
8:47618277-47628837+	3.6955	6.84081	0.566474	0.804102	up	3	0	6.73103	3.03553	8	47618276	47628837	+
1:235037788-235047024-	3.6955	6.84081	0.566474	0.804102	up	3	0	6.73103	3.03553	1	235037787	235047024	-
X:115716154-115718851+	3.6955	6.84081	0.566474	0.804102	up	3	0	6.73103	3.03553	X	115716153	115718851	+
2:2709486-2715997+	3.6955	6.84081	0.566474	0.804102	up	3	0	6.73103	3.03553	2	2709485	2715997	+
10:11541022-11541349+	3.6955	6.84081	0.566474	0.804102	up	3	0	6.73103	3.03553	10	11541021	11541349	+
1:252871625-252880748-	3.6955	6.84081	0.566474	0.804102	up	3	0	6.73103	3.03553	1	252871624	252880748	-
13:42072069-42081562-	3.6955	6.84081	0.566474	0.804102	up	3	0	6.73103	3.03553	13	42072068	42081562	-
X:125406262-125412479+	3.6955	6.84081	0.566474	0.804102	up	3	0	6.73103	3.03553	X	125406261	125412479	+
3:172676962-172678457+	3.6955	6.84081	0.566474	0.804102	up	3	0	6.73103	3.03553	3	172676961	172678457	+
3:160437712-160440674+	3.6955	6.84081	0.566474	0.804102	up	3	0	6.73103	3.03553	3	160437711	160440674	+
9:77216205-77238036-	3.6955	6.84081	0.566474	0.804102	up	3	0	6.73103	3.03553	9	77216204	77238036	-
24:26869238-26869996-	3.6955	6.84081	0.566474	0.804102	up	3	0	6.73103	3.03553	24	26869237	26869996	-
24:37898185-37902952-	3.6955	6.84081	0.566474	0.804102	up	3	0	6.73103	3.03553	24	37898184	37902952	-
15:4027072-4031881+	3.6955	6.84081	0.566474	0.804102	up	3	0	6.73103	3.03553	15	4027071	4031881	+
2:204143338-204151933+	3.6955	6.84081	0.566474	0.804102	up	3	0	6.73103	3.03553	2	204143337	204151933	+
19:51794123-51794349+	3.6955	6.84081	0.566474	0.804102	up	3	0	6.73103	3.03553	19	51794122	51794349	+
12:18505733-18572703-	3.6955	6.84081	0.566474	0.804102	up	3	0	6.73103	3.03553	12	18505732	18572703	-
20:9936346-9953421-	3.6955	6.84081	0.566474	0.804102	up	3	0	6.73103	3.03553	20	9936345	9953421	-
18:13272895-13302172-	3.6955	6.84081	0.566474	0.804102	up	3	0	6.73103	3.03553	18	13272894	13302172	-
8:63697146-63724814-	3.6955	6.84081	0.566474	0.804102	up	3	0	6.73103	3.03553	8	63697145	63724814	-
16:66329971-66331026-	3.6955	6.84081	0.566474	0.804102	up	3	0	6.73103	3.03553	16	66329970	66331026	-
10:75132908-75133444-	3.6955	6.84081	0.566474	0.804102	up	3	0	6.73103	3.03553	10	75132907	75133444	-
4:104686055-104687471-	3.6955	6.84081	0.566474	0.804102	up	3	0	6.73103	3.03553	4	104686054	104687471	-
X:113619788-113633877-	3.6955	6.84081	0.566474	0.804102	up	3	0	6.73103	3.03553	X	113619787	113633877	-
X:89513727-89513890-	3.6955	6.84081	0.566474	0.804102	up	3	0	6.73103	3.03553	X	89513726	89513890	-
7:57343910-57364519+	3.6955	6.84081	0.566474	0.804102	up	3	0	6.73103	3.03553	7	57343909	57364519	+
1:187131933-187134538+	3.6955	6.84081	0.566474	0.804102	up	3	0	6.73103	3.03553	1	187131932	187134538	+
4:66597806-66602347-	3.6955	6.84081	0.566474	0.804102	up	3	0	6.73103	3.03553	4	66597805	66602347	-
10:23179618-23183809+	3.6955	6.84081	0.566474	0.804102	up	3	0	6.73103	3.03553	10	23179617	23183809	+
17:4648177-4656452-	3.6955	6.84081	0.566474	0.804102	up	3	0	6.73103	3.03553	17	4648176	4656452	-
3:80616412-80653667+	3.6955	6.84081	0.566474	0.804102	up	3	0	6.73103	3.03553	3	80616411	80653667	+
23:42177571-42177812-	3.6955	6.84081	0.566474	0.804102	up	3	0	6.73103	3.03553	23	42177570	42177812	-
11:54025669-54045371-	3.6955	6.84081	0.566474	0.804102	up	3	0	6.73103	3.03553	11	54025668	54045371	-
5:91589584-91682483-	3.6955	6.84081	0.566474	0.804102	up	3	0	6.73103	3.03553	5	91589583	91682483	-
3:34390079-34390443-	3.6955	6.84081	0.566474	0.804102	up	3	0	6.73103	3.03553	3	34390078	34390443	-
11:34092912-34093234+	3.6955	6.84081	0.566474	0.804102	up	3	0	6.73103	3.03553	11	34092911	34093234	+
1:90883495-90906416-	3.6955	6.84081	0.566474	0.804102	up	3	0	6.73103	3.03553	1	90883494	90906416	-
18:59916137-59931582-	3.6955	6.84081	0.566474	0.804102	up	3	0	6.73103	3.03553	18	59916136	59931582	-
14:60832727-60832971-	3.6955	6.84081	0.566474	0.804102	up	3	0	6.73103	3.03553	14	60832726	60832971	-
17:48309054-48309942-	3.6955	6.84081	0.566474	0.804102	up	3	0	6.73103	3.03553	17	48309053	48309942	-
14:44053583-44055868+	3.6955	6.84081	0.566474	0.804102	up	3	0	6.73103	3.03553	14	44053582	44055868	+
1:267648536-267720948+	3.6955	6.84081	0.566474	0.804102	up	3	0	6.73103	3.03553	1	267648535	267720948	+
1:71463521-71470023+	3.6955	6.84081	0.566474	0.804102	up	3	0	6.73103	3.03553	1	71463520	71470023	+
1:255217905-255218585-	3.6955	6.84081	0.566474	0.804102	up	3	0	6.73103	3.03553	1	255217904	255218585	-
2:34748191-34804081-	3.6955	6.84081	0.566474	0.804102	up	3	0	6.73103	3.03553	2	34748190	34804081	-
3:105990347-106013636+	3.6955	6.84081	0.566474	0.804102	up	3	0	6.73103	3.03553	3	105990346	106013636	+
X:108273361-108274023-	3.6955	6.84081	0.566474	0.804102	up	3	0	6.73103	3.03553	X	108273360	108274023	-
1:174354937-174355278+	3.6955	6.84081	0.566474	0.804102	up	3	0	6.73103	3.03553	1	174354936	174355278	+
7:66514415-66515596-	3.6955	6.84081	0.566474	0.804102	up	3	0	6.73103	3.03553	7	66514414	66515596	-
26:38675406-38690837+	3.6955	6.84081	0.566474	0.804102	up	3	0	6.73103	3.03553	26	38675405	38690837	+
3:85045050-85056382+	3.6955	6.84081	0.566474	0.804102	up	3	0	6.73103	3.03553	3	85045049	85056382	+
11:42298093-42298411-	3.6955	6.84081	0.566474	0.804102	up	3	0	6.73103	3.03553	11	42298092	42298411	-
1:169943658-169957750-	3.6955	6.84081	0.566474	0.804102	up	3	0	6.73103	3.03553	1	169943657	169957750	-
X:7947996-7951814-	3.6955	6.84081	0.566474	0.804102	up	3	0	6.73103	3.03553	X	7947995	7951814	-
1:266556986-266559214+	3.6955	6.84081	0.566474	0.804102	up	3	0	6.73103	3.03553	1	266556985	266559214	+
2:198049220-198057640-	3.6955	6.84081	0.566474	0.804102	up	3	0	6.73103	3.03553	2	198049219	198057640	-
2:49839757-49842374-	3.6955	6.84081	0.566474	0.804102	up	3	0	6.73103	3.03553	2	49839756	49842374	-
17:17855258-17878364-	3.6955	6.84081	0.566474	0.804102	up	3	0	6.73103	3.03553	17	17855257	17878364	-
X:77473774-77474675-	3.6955	6.84081	0.566474	0.804102	up	3	0	6.73103	3.03553	X	77473773	77474675	-
X:53396033-53409042+	3.6955	6.84081	0.566474	0.804102	up	3	0	6.73103	3.03553	X	53396032	53409042	+
3:115187602-115187944-	3.6955	6.84081	0.566474	0.804102	up	3	0	6.73103	3.03553	3	115187601	115187944	-
X:38906760-38932527-	3.6955	6.84081	0.566474	0.804102	up	3	0	6.73103	3.03553	X	38906759	38932527	-
3:132802189-132802399+	3.6955	6.84081	0.566474	0.804102	up	3	0	6.73103	3.03553	3	132802188	132802399	+
18:25853324-25855970-	3.6955	6.84081	0.566474	0.804102	up	3	0	6.73103	3.03553	18	25853323	25855970	-
3:5297379-5299106-	3.6955	6.84081	0.566474	0.804102	up	3	0	6.73103	3.03553	3	5297378	5299106	-
1:28085669-28097365-	3.6955	6.84081	0.566474	0.804102	up	3	0	6.73103	3.03553	1	28085668	28097365	-
5:105666502-105684853-	3.6955	6.84081	0.566474	0.804102	up	3	0	6.73103	3.03553	5	105666501	105684853	-
1:13493522-13494006-	3.6955	6.84081	0.566474	0.804102	up	3	0	6.73103	3.03553	1	13493521	13494006	-
18:63522798-63523216+	3.6955	6.84081	0.566474	0.804102	up	3	0	6.73103	3.03553	18	63522797	63523216	+
4:55584922-55585527-	3.6955	6.84081	0.566474	0.804102	up	3	0	6.73103	3.03553	4	55584921	55585527	-
3:106027658-106038834+	3.6955	6.84081	0.566474	0.804102	up	3	0	6.73103	3.03553	3	106027657	106038834	+
24:41591237-41594784-	3.6955	6.84081	0.566474	0.804102	up	3	0	6.73103	3.03553	24	41591236	41594784	-
4:9701690-9701890+	3.6955	6.84081	0.566474	0.804102	up	3	0	6.73103	3.03553	4	9701689	9701890	+
8:47601335-47611277+	3.6955	6.84081	0.566474	0.804102	up	3	0	6.73103	3.03553	8	47601334	47611277	+
13:17909573-17910172-	3.6955	6.84081	0.566474	0.804102	up	3	0	6.73103	3.03553	13	17909572	17910172	-
2:50594775-50610521-	3.6955	6.84081	0.566474	0.804102	up	3	0	6.73103	3.03553	2	50594774	50610521	-
2:47512613-47516081+	3.6955	6.84081	0.566474	0.804102	up	3	0	6.73103	3.03553	2	47512612	47516081	+
1:18695224-18695765+	3.6955	6.84081	0.566474	0.804102	up	3	0	6.73103	3.03553	1	18695223	18695765	+
26:32940744-32989917+	3.6955	6.84081	0.566474	0.804102	up	3	0	6.73103	3.03553	26	32940743	32989917	+
5:43333422-43333780+	3.6955	6.84081	0.566474	0.804102	up	3	0	6.73103	3.03553	5	43333421	43333780	+
2:34748191-34783288-	3.6955	6.84081	0.566474	0.804102	up	3	0	6.73103	3.03553	2	34748190	34783288	-
5:23356559-23379191-	3.6955	6.84081	0.566474	0.804102	up	3	0	6.73103	3.03553	5	23356558	23379191	-
6:97652913-97656708-	3.6955	6.84081	0.566474	0.804102	up	3	0	6.73103	3.03553	6	97652912	97656708	-
10:16437894-16461022-	3.6955	6.84081	0.566474	0.804102	up	3	0	6.73103	3.03553	10	16437893	16461022	-
11:17654241-17663603-	3.6955	6.84081	0.566474	0.804102	up	3	0	6.73103	3.03553	11	17654240	17663603	-
2:243218219-243232931-	3.6955	6.84081	0.566474	0.804102	up	3	0	6.73103	3.03553	2	243218218	243232931	-
6:87936542-87941765-	3.6955	6.84081	0.566474	0.804102	up	3	0	6.73103	3.03553	6	87936541	87941765	-
9:47705921-47706611-	3.6955	6.84081	0.566474	0.804102	up	3	0	6.73103	3.03553	9	47705920	47706611	-
8:57994046-58010128-	3.6955	6.84081	0.566474	0.804102	up	3	0	6.73103	3.03553	8	57994045	58010128	-
2:121493983-121506462-	3.6955	6.84081	0.566474	0.804102	up	3	0	6.73103	3.03553	2	121493982	121506462	-
2:86611142-86652090+	3.6955	6.84081	0.566474	0.804102	up	3	0	6.73103	3.03553	2	86611141	86652090	+
22:13532661-13544352+	3.6955	6.84081	0.566474	0.804102	up	3	0	6.73103	3.03553	22	13532660	13544352	+
17:29721926-29722179+	3.6955	6.84081	0.566474	0.804102	up	3	0	6.73103	3.03553	17	29721925	29722179	+
26:6781132-6783170-	3.6955	6.84081	0.566474	0.804102	up	3	0	6.73103	3.03553	26	6781131	6783170	-
16:58534569-58535275-	3.6955	6.84081	0.566474	0.804102	up	3	0	6.73103	3.03553	16	58534568	58535275	-
9:76971128-76987278+	3.6955	6.84081	0.566474	0.804102	up	3	0	6.73103	3.03553	9	76971127	76987278	+
23:40361894-40365277-	3.6955	6.84081	0.566474	0.804102	up	3	0	6.73103	3.03553	23	40361893	40365277	-
1:262813276-262813486+	3.6955	6.84081	0.566474	0.804102	up	3	0	6.73103	3.03553	1	262813275	262813486	+
11:20419975-20421252+	3.6955	6.84081	0.566474	0.804102	up	3	0	6.73103	3.03553	11	20419974	20421252	+
2:137514764-137543565+	3.6955	6.84081	0.566474	0.804102	up	3	0	6.73103	3.03553	2	137514763	137543565	+
9:32202193-32213028-	3.6955	6.84081	0.566474	0.804102	up	3	0	6.73103	3.03553	9	32202192	32213028	-
12:53323545-53323796-	3.6955	6.84081	0.566474	0.804102	up	3	0	6.73103	3.03553	12	53323544	53323796	-
11:4873025-4875461+	3.6955	6.84081	0.566474	0.804102	up	3	0	6.73103	3.03553	11	4873024	4875461	+
13:35567785-35576901+	3.6955	6.84081	0.566474	0.804102	up	3	0	6.73103	3.03553	13	35567784	35576901	+
9:13199079-13217329+	3.6955	6.84081	0.566474	0.804102	up	3	0	6.73103	3.03553	9	13199078	13217329	+
11:29802935-29854034-	3.6955	6.84081	0.566474	0.804102	up	3	0	6.73103	3.03553	11	29802934	29854034	-
9:3685537-3703858-	3.6955	6.84081	0.566474	0.804102	up	3	0	6.73103	3.03553	9	3685536	3703858	-
18:19788401-19788756-	3.6955	6.84081	0.566474	0.804102	up	3	0	6.73103	3.03553	18	19788400	19788756	-
4:9549216-9590820+	3.6955	6.84081	0.566474	0.804102	up	3	0	6.73103	3.03553	4	9549215	9590820	+
17:12151693-12170324+	3.6955	6.84081	0.566474	0.804102	up	3	0	6.73103	3.03553	17	12151692	12170324	+
9:94092310-94096964+	3.6955	6.84081	0.566474	0.804102	up	3	0	6.73103	3.03553	9	94092309	94096964	+
16:36978530-37050309+	3.6955	6.84081	0.566474	0.804102	up	3	0	6.73103	3.03553	16	36978529	37050309	+
9:44050482-44114110+	3.6955	6.84081	0.566474	0.804102	up	3	0	6.73103	3.03553	9	44050481	44114110	+
7:12401781-12403082-	3.6955	6.84081	0.566474	0.804102	up	3	0	6.73103	3.03553	7	12401780	12403082	-
21:40274335-40275196-	3.6955	6.84081	0.566474	0.804102	up	3	0	6.73103	3.03553	21	40274334	40275196	-
17:52727774-52730173+	3.6955	6.84081	0.566474	0.804102	up	3	0	6.73103	3.03553	17	52727773	52730173	+
8:57112838-57151044+	3.6955	6.84081	0.566474	0.804102	up	3	0	6.73103	3.03553	8	57112837	57151044	+
7:72596407-72635606-	3.6955	6.84081	0.566474	0.804102	up	3	0	6.73103	3.03553	7	72596406	72635606	-
18:53711160-53748934+	3.6955	6.84081	0.566474	0.804102	up	3	0	6.73103	3.03553	18	53711159	53748934	+
5:78081668-78130809+	3.6955	6.84081	0.566474	0.804102	up	3	0	6.73103	3.03553	5	78081667	78130809	+
11:45446906-45448238-	3.6955	6.84081	0.566474	0.804102	up	3	0	6.73103	3.03553	11	45446905	45448238	-
15:42196391-42199846+	3.6955	6.84081	0.566474	0.804102	up	3	0	6.73103	3.03553	15	42196390	42199846	+
18:6973773-6974318+	3.6955	6.84081	0.566474	0.804102	up	3	0	6.73103	3.03553	18	6973772	6974318	+
5:20324648-20364644+	3.6955	6.84081	0.566474	0.804102	up	3	0	6.73103	3.03553	5	20324647	20364644	+
6:69754873-69757283+	3.6955	6.84081	0.566474	0.804102	up	3	0	6.73103	3.03553	6	69754872	69757283	+
3:125721160-125745439-	3.6955	6.84081	0.566474	0.804102	up	3	0	6.73103	3.03553	3	125721159	125745439	-
8:75882133-75906457-	3.6955	6.84081	0.566474	0.804102	up	3	0	6.73103	3.03553	8	75882132	75906457	-
12:30577763-30587638+	3.6955	6.84081	0.566474	0.804102	up	3	0	6.73103	3.03553	12	30577762	30587638	+
3:62876756-62880486+	3.6955	6.84081	0.566474	0.804102	up	3	0	6.73103	3.03553	3	62876755	62880486	+
23:54445913-54447893+	3.6955	6.84081	0.566474	0.804102	up	3	0	6.73103	3.03553	23	54445912	54447893	+
14:25737591-25746209-	3.6955	6.84081	0.566474	0.804102	up	3	0	6.73103	3.03553	14	25737590	25746209	-
21:40277258-40280563-	3.6955	6.84081	0.566474	0.804102	up	3	0	6.73103	3.03553	21	40277257	40280563	-
9:94003691-94015611+	3.6955	6.84081	0.566474	0.804102	up	3	0	6.73103	3.03553	9	94003690	94015611	+
6:88783856-88834974+	3.6955	6.84081	0.566474	0.804102	up	3	0	6.73103	3.03553	6	88783855	88834974	+
15:50673173-50676937+	3.6955	6.84081	0.566474	0.804102	up	3	0	6.73103	3.03553	15	50673172	50676937	+
20:12480462-12486503-	3.6955	6.84081	0.566474	0.804102	up	3	0	6.73103	3.03553	20	12480461	12486503	-
9:77385614-77407551-	3.6955	6.84081	0.566474	0.804102	up	3	0	6.73103	3.03553	9	77385613	77407551	-
11:46380525-46393617+	3.6955	6.84081	0.566474	0.804102	up	3	0	6.73103	3.03553	11	46380524	46393617	+
9:57836625-57848710-	3.6955	6.84081	0.566474	0.804102	up	3	0	6.73103	3.03553	9	57836624	57848710	-
26:5242344-5244514+	3.6955	6.84081	0.566474	0.804102	up	3	0	6.73103	3.03553	26	5242343	5244514	+
9:59288503-59290166+	3.6955	6.84081	0.566474	0.804102	up	3	0	6.73103	3.03553	9	59288502	59290166	+
3:118803970-118864922+	3.6955	6.84081	0.566474	0.804102	up	3	0	6.73103	3.03553	3	118803969	118864922	+
6:94299448-94323392-	3.6955	6.84081	0.566474	0.804102	up	3	0	6.73103	3.03553	6	94299447	94323392	-
2:73318846-73345561+	3.6955	6.84081	0.566474	0.804102	up	3	0	6.73103	3.03553	2	73318845	73345561	+
3:75942453-75943214-	3.6955	6.84081	0.566474	0.804102	up	3	0	6.73103	3.03553	3	75942452	75943214	-
17:4218333-4239794-	3.6955	6.84081	0.566474	0.804102	up	3	0	6.73103	3.03553	17	4218332	4239794	-
3:193506547-193511302-	3.6955	6.84081	0.566474	0.804102	up	3	0	6.73103	3.03553	3	193506546	193511302	-
7:43274346-43281804+	3.6955	6.84081	0.566474	0.804102	up	3	0	6.73103	3.03553	7	43274345	43281804	+
17:5032277-5095993+	3.6955	6.84081	0.566474	0.804102	up	3	0	6.73103	3.03553	17	5032276	5095993	+
1:185162890-185178644-	3.6955	6.84081	0.566474	0.804102	up	3	0	6.73103	3.03553	1	185162889	185178644	-
2:102100050-102126494-	3.6955	6.84081	0.566474	0.804102	up	3	0	6.73103	3.03553	2	102100049	102126494	-
1:188534951-188535534-	3.6955	6.84081	0.566474	0.804102	up	3	0	6.73103	3.03553	1	188534950	188535534	-
2:12765657-12769732+	3.6955	6.84081	0.566474	0.804102	up	3	0	6.73103	3.03553	2	12765656	12769732	+
7:64050865-64051272-	3.6955	6.84081	0.566474	0.804102	up	3	0	6.73103	3.03553	7	64050864	64051272	-
19:36919826-36942558+	3.6955	6.84081	0.566474	0.804102	up	3	0	6.73103	3.03553	19	36919825	36942558	+
14:15153199-15253108-	3.6955	6.84081	0.566474	0.804102	up	3	0	6.73103	3.03553	14	15153198	15253108	-
2:207783258-207799769-	3.6955	6.84081	0.566474	0.804102	up	3	0	6.73103	3.03553	2	207783257	207799769	-
23:23792266-23881329-	3.6955	6.84081	0.566474	0.804102	up	3	0	6.73103	3.03553	23	23792265	23881329	-
19:57655648-57665143-	3.6955	6.84081	0.566474	0.804102	up	3	0	6.73103	3.03553	19	57655647	57665143	-
6:6084708-6090285+	3.6955	6.84081	0.566474	0.804102	up	3	0	6.73103	3.03553	6	6084707	6090285	+
2:39924215-39969908+	3.6955	6.84081	0.566474	0.804102	up	3	0	6.73103	3.03553	2	39924214	39969908	+
5:9454310-9457142-	3.6955	6.84081	0.566474	0.804102	up	3	0	6.73103	3.03553	5	9454309	9457142	-
23:50590475-50596449+	3.6955	6.84081	0.566474	0.804102	up	3	0	6.73103	3.03553	23	50590474	50596449	+
3:5292727-5297556-	3.6955	6.84081	0.566474	0.804102	up	3	0	6.73103	3.03553	3	5292726	5297556	-
11:62086744-62090153-	3.6955	6.84081	0.566474	0.804102	up	3	0	6.73103	3.03553	11	62086743	62090153	-
17:10005028-10046342-	3.6955	6.84081	0.566474	0.804102	up	3	0	6.73103	3.03553	17	10005027	10046342	-
7:45147024-45147545+	3.6955	6.84081	0.566474	0.804102	up	3	0	6.73103	3.03553	7	45147023	45147545	+
3:3019890-3020578+	3.6955	6.84081	0.566474	0.804102	up	3	0	6.73103	3.03553	3	3019889	3020578	+
8:47571324-47582410+	3.6955	6.84081	0.566474	0.804102	up	3	0	6.73103	3.03553	8	47571323	47582410	+
4:65838219-65841005+	3.6955	6.84081	0.566474	0.804102	up	3	0	6.73103	3.03553	4	65838218	65841005	+
17:12856550-12860271+	3.6955	6.84081	0.566474	0.804102	up	3	0	6.73103	3.03553	17	12856549	12860271	+
17:57621710-57622218-	3.6955	6.84081	0.566474	0.804102	up	3	0	6.73103	3.03553	17	57621709	57622218	-
18:44829222-44836566-	3.6955	6.84081	0.566474	0.804102	up	3	0	6.73103	3.03553	18	44829221	44836566	-
20:8762820-8801213-	3.6955	6.84081	0.566474	0.804102	up	3	0	6.73103	3.03553	20	8762819	8801213	-
5:85134371-85138396-	3.6955	6.84081	0.566474	0.804102	up	3	0	6.73103	3.03553	5	85134370	85138396	-
1:26359977-26412502+	3.6955	6.84081	0.566474	0.804102	up	3	0	6.73103	3.03553	1	26359976	26412502	+
2:135682015-135682276+	3.6955	6.84081	0.566474	0.804102	up	3	0	6.73103	3.03553	2	135682014	135682276	+
12:43688939-43690792-	3.6955	6.84081	0.566474	0.804102	up	3	0	6.73103	3.03553	12	43688938	43690792	-
2:33822950-33840269+	3.6955	6.84081	0.566474	0.804102	up	3	0	6.73103	3.03553	2	33822949	33840269	+
1:261749451-261783178-	3.6955	6.84081	0.566474	0.804102	up	3	0	6.73103	3.03553	1	261749450	261783178	-
2:14123976-14130714+	3.6955	6.84081	0.566474	0.804102	up	3	0	6.73103	3.03553	2	14123975	14130714	+
1:210918461-210932013-	3.6955	6.84081	0.566474	0.804102	up	3	0	6.73103	3.03553	1	210918460	210932013	-
13:43761057-43761255-	3.6955	6.84081	0.566474	0.804102	up	3	0	6.73103	3.03553	13	43761056	43761255	-
14:49727500-49728790-	3.6955	6.84081	0.566474	0.804102	up	3	0	6.73103	3.03553	14	49727499	49728790	-
13:15696965-15729230-	3.6955	6.84081	0.566474	0.804102	up	3	0	6.73103	3.03553	13	15696964	15729230	-
20:24909236-24926681-	3.6955	6.84081	0.566474	0.804102	up	3	0	6.73103	3.03553	20	24909235	24926681	-
10:72336794-72337125+	3.6955	6.84081	0.566474	0.804102	up	3	0	6.73103	3.03553	10	72336793	72337125	+
15:31671579-31672852+	3.6955	6.84081	0.566474	0.804102	up	3	0	6.73103	3.03553	15	31671578	31672852	+
7:83955081-83968057+	3.6955	6.84081	0.566474	0.804102	up	3	0	6.73103	3.03553	7	83955080	83968057	+
9:67783216-67792953+	3.6955	6.84081	0.566474	0.804102	up	3	0	6.73103	3.03553	9	67783215	67792953	+
2:65872221-65879273-	3.6955	6.84081	0.566474	0.804102	up	3	0	6.73103	3.03553	2	65872220	65879273	-
7:40543643-40546573+	3.6955	6.84081	0.566474	0.804102	up	3	0	6.73103	3.03553	7	40543642	40546573	+
5:55962728-55963983+	3.6955	6.84081	0.566474	0.804102	up	3	0	6.73103	3.03553	5	55962727	55963983	+
X:21289576-21306716+	3.6955	6.84081	0.566474	0.804102	up	3	0	6.73103	3.03553	X	21289575	21306716	+
5:105632721-105684853-	3.6955	6.84081	0.566474	0.804102	up	3	0	6.73103	3.03553	5	105632720	105684853	-
3:200229557-200285002-	3.6955	6.84081	0.566474	0.804102	up	3	0	6.73103	3.03553	3	200229556	200285002	-
3:106095824-106099711+	3.6955	6.84081	0.566474	0.804102	up	3	0	6.73103	3.03553	3	106095823	106099711	+
14:57775940-57776107+	3.6955	6.84081	0.566474	0.804102	up	3	0	6.73103	3.03553	14	57775939	57776107	+
3:131181676-131181859-	3.6955	6.84081	0.566474	0.804102	up	3	0	6.73103	3.03553	3	131181675	131181859	-
X:40762891-40763180+	3.6955	6.84081	0.566474	0.804102	up	3	0	6.73103	3.03553	X	40762890	40763180	+
2:234328387-234328633-	3.6955	6.84081	0.566474	0.804102	up	3	0	6.73103	3.03553	2	234328386	234328633	-
1:102912075-102912870-	3.6955	6.84081	0.566474	0.804102	up	3	0	6.73103	3.03553	1	102912074	102912870	-
21:28622283-28625315-	3.6955	6.84081	0.566474	0.804102	up	3	0	6.73103	3.03553	21	28622282	28625315	-
10:28617803-28639877-	3.6955	6.84081	0.566474	0.804102	up	3	0	6.73103	3.03553	10	28617802	28639877	-
5:60213717-60215175-	3.6955	6.84081	0.566474	0.804102	up	3	0	6.73103	3.03553	5	60213716	60215175	-
24:20144989-20152966+	3.6955	6.84081	0.566474	0.804102	up	3	0	6.73103	3.03553	24	20144988	20152966	+
3:94650521-94667907-	3.6955	6.84081	0.566474	0.804102	up	3	0	6.73103	3.03553	3	94650520	94667907	-
18:59622485-59623027-	3.6955	6.84081	0.566474	0.804102	up	3	0	6.73103	3.03553	18	59622484	59623027	-
5:43650359-43656807+	3.6955	6.84081	0.566474	0.804102	up	3	0	6.73103	3.03553	5	43650358	43656807	+
23:23863680-23881329-	3.6955	6.84081	0.566474	0.804102	up	3	0	6.73103	3.03553	23	23863679	23881329	-
17:44693507-44698061-	3.6955	6.84081	0.566474	0.804102	up	3	0	6.73103	3.03553	17	44693506	44698061	-
6:90680055-90685656-	3.6955	6.84081	0.566474	0.804102	up	3	0	6.73103	3.03553	6	90680054	90685656	-
13:1836479-1846406+	3.6955	6.84081	0.566474	0.804102	up	3	0	6.73103	3.03553	13	1836478	1846406	+
24:20810950-20815893-	3.6955	6.84081	0.566474	0.804102	up	3	0	6.73103	3.03553	24	20810949	20815893	-
15:42196391-42256002+	3.6955	6.84081	0.566474	0.804102	up	3	0	6.73103	3.03553	15	42196390	42256002	+
24:33752768-33755612+	3.6955	6.84081	0.566474	0.804102	up	3	0	6.73103	3.03553	24	33752767	33755612	+
13:39628438-39635418+	3.6955	6.84081	0.566474	0.804102	up	3	0	6.73103	3.03553	13	39628437	39635418	+
2:125631756-125679932+	3.6955	6.84081	0.566474	0.804102	up	3	0	6.73103	3.03553	2	125631755	125679932	+
16:7801323-7806184-	3.6955	6.84081	0.566474	0.804102	up	3	0	6.73103	3.03553	16	7801322	7806184	-
13:32560217-32560480+	3.6955	6.84081	0.566474	0.804102	up	3	0	6.73103	3.03553	13	32560216	32560480	+
8:25418483-25422655+	3.6955	6.84081	0.566474	0.804102	up	3	0	6.73103	3.03553	8	25418482	25422655	+
2:204376035-204408250-	3.6955	6.84081	0.566474	0.804102	up	3	0	6.73103	3.03553	2	204376034	204408250	-
25:8792182-8797865-	3.6955	6.84081	0.566474	0.804102	up	3	0	6.73103	3.03553	25	8792181	8797865	-
7:13328308-13332193+	3.6955	6.84081	0.566474	0.804102	up	3	0	6.73103	3.03553	7	13328307	13332193	+
X:120546576-120546903-	3.6955	6.84081	0.566474	0.804102	up	3	0	6.73103	3.03553	X	120546575	120546903	-
X:99157345-99158581-	3.6955	6.84081	0.566474	0.804102	up	3	0	6.73103	3.03553	X	99157344	99158581	-
14:24405058-24405277-	3.6955	6.84081	0.566474	0.804102	up	3	0	6.73103	3.03553	14	24405057	24405277	-
21:17503900-17515544+	3.6955	6.84081	0.566474	0.804102	up	3	0	6.73103	3.03553	21	17503899	17515544	+
4:114538607-114539539+	3.69035	9.16068	0.288611	0.804102	up	29	2	9.90059	6.21024	4	114538606	114539539	+
15:17303336-17307367-	3.55723	10.1809	0.280576	0.804102	up	62	5	10.9902	7.43297	15	17303335	17307367	-
18:60358445-60363401+	3.50729	12.3438	0.271494	0.804102	up	289	25	13.2064	9.69907	18	60358444	60363401	+
23:49192997-49194555-	3.47821	8.98576	0.31712	0.804102	up	25	2	9.68844	6.21024	23	49192996	49194555	-
7:43397802-43398957+	3.4644	9.81265	0.297136	0.804102	up	47	4	10.5924	7.12805	7	43397801	43398957	+
9:77402159-77414338-	3.402	9.75925	0.305435	0.804102	up	45	4	10.5301	7.12805	9	77402158	77414338	-
X:89514049-89514210-	3.35916	8.88965	0.334199	0.804102	up	23	2	9.56939	6.21024	X	89514048	89514210	-
5:20312817-20333423+	3.35879	10.0086	0.306305	0.804102	up	54	5	10.7918	7.43297	5	20312816	20333423	+
13:31162868-31163353-	3.30051	9.31693	0.327592	0.804102	up	32	3	10.0414	6.74093	13	31162867	31163353	-
12:20017554-20021404+	3.29574	8.83908	0.343626	0.804102	up	22	2	9.50597	6.21024	12	20017553	20021404	+
7:10873717-10901270-	3.19029	10.7861	0.318531	0.804102	up	94	10	11.5886	8.39833	7	10873716	10901270	-
3:65858858-65865291-	3.16517	6.61888	0.710983	0.804102	up	2	0	6.2007	3.03553	3	65858857	65865291	-
12:24819700-24824251-	3.16517	6.61888	0.710983	0.804102	up	2	0	6.2007	3.03553	12	24819699	24824251	-
15:24103373-24105181-	3.16517	6.61888	0.710983	0.804102	up	2	0	6.2007	3.03553	15	24103372	24105181	-
3:10667301-10673490-	3.16517	6.61888	0.710983	0.804102	up	2	0	6.2007	3.03553	3	10667300	10673490	-
10:22976728-23006788-	3.16517	6.61888	0.710983	0.804102	up	2	0	6.2007	3.03553	10	22976727	23006788	-
16:37927593-37929630+	3.16517	6.61888	0.710983	0.804102	up	2	0	6.2007	3.03553	16	37927592	37929630	+
1:120431723-120436223-	3.16517	6.61888	0.710983	0.804102	up	2	0	6.2007	3.03553	1	120431722	120436223	-
4:9344771-9347986+	3.16517	6.61888	0.710983	0.804102	up	2	0	6.2007	3.03553	4	9344770	9347986	+
25:29867659-29868045-	3.16517	6.61888	0.710983	0.804102	up	2	0	6.2007	3.03553	25	29867658	29868045	-
2:36688341-36688520+	3.16517	6.61888	0.710983	0.804102	up	2	0	6.2007	3.03553	2	36688340	36688520	+
20:17017096-17022911-	3.16517	6.61888	0.710983	0.804102	up	2	0	6.2007	3.03553	20	17017095	17022911	-
11:52352081-52352242-	3.16517	6.61888	0.710983	0.804102	up	2	0	6.2007	3.03553	11	52352080	52352242	-
14:1110168-1110574-	3.16517	6.61888	0.710983	0.804102	up	2	0	6.2007	3.03553	14	1110167	1110574	-
1:14088965-14091272-	3.16517	6.61888	0.710983	0.804102	up	2	0	6.2007	3.03553	1	14088964	14091272	-
12:55270114-55276851-	3.16517	6.61888	0.710983	0.804102	up	2	0	6.2007	3.03553	12	55270113	55276851	-
3:102577663-102580047+	3.16517	6.61888	0.710983	0.804102	up	2	0	6.2007	3.03553	3	102577662	102580047	+
6:115237972-115238622-	3.16517	6.61888	0.710983	0.804102	up	2	0	6.2007	3.03553	6	115237971	115238622	-
19:53393083-53398900+	3.16517	6.61888	0.710983	0.804102	up	2	0	6.2007	3.03553	19	53393082	53398900	+
X:21388812-21392169+	3.16517	6.61888	0.710983	0.804102	up	2	0	6.2007	3.03553	X	21388811	21392169	+
8:27886056-27887535+	3.16517	6.61888	0.710983	0.804102	up	2	0	6.2007	3.03553	8	27886055	27887535	+
7:25677960-25678176-	3.16517	6.61888	0.710983	0.804102	up	2	0	6.2007	3.03553	7	25677959	25678176	-
20:41805887-41806116-	3.16517	6.61888	0.710983	0.804102	up	2	0	6.2007	3.03553	20	41805886	41806116	-
4:102617627-102622891+	3.16517	6.61888	0.710983	0.804102	up	2	0	6.2007	3.03553	4	102617626	102622891	+
8:90640781-90654648-	3.16517	6.61888	0.710983	0.804102	up	2	0	6.2007	3.03553	8	90640780	90654648	-
16:56346603-56377054-	3.16517	6.61888	0.710983	0.804102	up	2	0	6.2007	3.03553	16	56346602	56377054	-
20:38697900-38705542+	3.16517	6.61888	0.710983	0.804102	up	2	0	6.2007	3.03553	20	38697899	38705542	+
10:32045048-32045343-	3.16517	6.61888	0.710983	0.804102	up	2	0	6.2007	3.03553	10	32045047	32045343	-
22:18060933-18062207-	3.16517	6.61888	0.710983	0.804102	up	2	0	6.2007	3.03553	22	18060932	18062207	-
22:38916479-38920205-	3.16517	6.61888	0.710983	0.804102	up	2	0	6.2007	3.03553	22	38916478	38920205	-
22:20917791-20947211+	3.16517	6.61888	0.710983	0.804102	up	2	0	6.2007	3.03553	22	20917790	20947211	+
5:41863407-41868433-	3.16517	6.61888	0.710983	0.804102	up	2	0	6.2007	3.03553	5	41863406	41868433	-
6:58268864-58298194+	3.16517	6.61888	0.710983	0.804102	up	2	0	6.2007	3.03553	6	58268863	58298194	+
19:32479869-32484133+	3.16517	6.61888	0.710983	0.804102	up	2	0	6.2007	3.03553	19	32479868	32484133	+
12:25414279-25417740+	3.16517	6.61888	0.710983	0.804102	up	2	0	6.2007	3.03553	12	25414278	25417740	+
20:44424597-44425055-	3.16517	6.61888	0.710983	0.804102	up	2	0	6.2007	3.03553	20	44424596	44425055	-
1:30787459-30787888-	3.16517	6.61888	0.710983	0.804102	up	2	0	6.2007	3.03553	1	30787458	30787888	-
6:90271559-90276893+	3.16517	6.61888	0.710983	0.804102	up	2	0	6.2007	3.03553	6	90271558	90276893	+
19:36400084-36405209-	3.16517	6.61888	0.710983	0.804102	up	2	0	6.2007	3.03553	19	36400083	36405209	-
8:56423534-56445801+	3.16517	6.61888	0.710983	0.804102	up	2	0	6.2007	3.03553	8	56423533	56445801	+
2:225637063-225637260+	3.16517	6.61888	0.710983	0.804102	up	2	0	6.2007	3.03553	2	225637062	225637260	+
16:36659393-36665174-	3.16517	6.61888	0.710983	0.804102	up	2	0	6.2007	3.03553	16	36659392	36665174	-
2:82164978-82203397-	3.16517	6.61888	0.710983	0.804102	up	2	0	6.2007	3.03553	2	82164977	82203397	-
25:19359584-19368508-	3.16517	6.61888	0.710983	0.804102	up	2	0	6.2007	3.03553	25	19359583	19368508	-
15:21982997-21992408+	3.16517	6.61888	0.710983	0.804102	up	2	0	6.2007	3.03553	15	21982996	21992408	+
14:37459033-37459385+	3.16517	6.61888	0.710983	0.804102	up	2	0	6.2007	3.03553	14	37459032	37459385	+
8:30497334-30506043-	3.16517	6.61888	0.710983	0.804102	up	2	0	6.2007	3.03553	8	30497333	30506043	-
4:98644908-98648044+	3.16517	6.61888	0.710983	0.804102	up	2	0	6.2007	3.03553	4	98644907	98648044	+
10:52738808-52797043-	3.16517	6.61888	0.710983	0.804102	up	2	0	6.2007	3.03553	10	52738807	52797043	-
7:79149479-79154134-	3.16517	6.61888	0.710983	0.804102	up	2	0	6.2007	3.03553	7	79149478	79154134	-
1:99391645-99396387+	3.16517	6.61888	0.710983	0.804102	up	2	0	6.2007	3.03553	1	99391644	99396387	+
12:35632260-35637036+	3.16517	6.61888	0.710983	0.804102	up	2	0	6.2007	3.03553	12	35632259	35637036	+
1:16170394-16172823-	3.16517	6.61888	0.710983	0.804102	up	2	0	6.2007	3.03553	1	16170393	16172823	-
1:87602445-87609363-	3.16517	6.61888	0.710983	0.804102	up	2	0	6.2007	3.03553	1	87602444	87609363	-
3:169829194-169867774+	3.16517	6.61888	0.710983	0.804102	up	2	0	6.2007	3.03553	3	169829193	169867774	+
14:46326191-46339999-	3.16517	6.61888	0.710983	0.804102	up	2	0	6.2007	3.03553	14	46326190	46339999	-
1:118403317-118403531+	3.16517	6.61888	0.710983	0.804102	up	2	0	6.2007	3.03553	1	118403316	118403531	+
2:2133875-2139854+	3.16517	6.61888	0.710983	0.804102	up	2	0	6.2007	3.03553	2	2133874	2139854	+
1:33248043-33248233-	3.16517	6.61888	0.710983	0.804102	up	2	0	6.2007	3.03553	1	33248042	33248233	-
15:80446076-80446889-	3.16517	6.61888	0.710983	0.804102	up	2	0	6.2007	3.03553	15	80446075	80446889	-
7:84435517-84461092+	3.16517	6.61888	0.710983	0.804102	up	2	0	6.2007	3.03553	7	84435516	84461092	+
23:32682015-32750841+	3.16517	6.61888	0.710983	0.804102	up	2	0	6.2007	3.03553	23	32682014	32750841	+
12:26615052-26620594-	3.16517	6.61888	0.710983	0.804102	up	2	0	6.2007	3.03553	12	26615051	26620594	-
1:68700496-68702491-	3.16517	6.61888	0.710983	0.804102	up	2	0	6.2007	3.03553	1	68700495	68702491	-
25:10217473-10221719+	3.16517	6.61888	0.710983	0.804102	up	2	0	6.2007	3.03553	25	10217472	10221719	+
3:128381779-128382174-	3.16517	6.61888	0.710983	0.804102	up	2	0	6.2007	3.03553	3	128381778	128382174	-
11:42073498-42076160+	3.16517	6.61888	0.710983	0.804102	up	2	0	6.2007	3.03553	11	42073497	42076160	+
2:201836838-201839236+	3.16517	6.61888	0.710983	0.804102	up	2	0	6.2007	3.03553	2	201836837	201839236	+
8:49571684-49586452-	3.16517	6.61888	0.710983	0.804102	up	2	0	6.2007	3.03553	8	49571683	49586452	-
2:143737201-143738523+	3.16517	6.61888	0.710983	0.804102	up	2	0	6.2007	3.03553	2	143737200	143738523	+
3:69884300-69891912-	3.16517	6.61888	0.710983	0.804102	up	2	0	6.2007	3.03553	3	69884299	69891912	-
7:35015379-35016241+	3.16517	6.61888	0.710983	0.804102	up	2	0	6.2007	3.03553	7	35015378	35016241	+
X:125304484-125332555-	3.16517	6.61888	0.710983	0.804102	up	2	0	6.2007	3.03553	X	125304483	125332555	-
X:40778344-40779747+	3.16517	6.61888	0.710983	0.804102	up	2	0	6.2007	3.03553	X	40778343	40779747	+
17:54829142-54831592-	3.16517	6.61888	0.710983	0.804102	up	2	0	6.2007	3.03553	17	54829141	54831592	-
23:7265006-7266683+	3.16517	6.61888	0.710983	0.804102	up	2	0	6.2007	3.03553	23	7265005	7266683	+
7:57304384-57355221+	3.16517	6.61888	0.710983	0.804102	up	2	0	6.2007	3.03553	7	57304383	57355221	+
3:176089337-176101575-	3.16517	6.61888	0.710983	0.804102	up	2	0	6.2007	3.03553	3	176089336	176101575	-
19:55849379-55854020+	3.16517	6.61888	0.710983	0.804102	up	2	0	6.2007	3.03553	19	55849378	55854020	+
24:3089839-3094307-	3.16517	6.61888	0.710983	0.804102	up	2	0	6.2007	3.03553	24	3089838	3094307	-
1:58039781-58055800+	3.16517	6.61888	0.710983	0.804102	up	2	0	6.2007	3.03553	1	58039780	58055800	+
3:209737520-209759209-	3.16517	6.61888	0.710983	0.804102	up	2	0	6.2007	3.03553	3	209737519	209759209	-
11:46851975-46914687+	3.16517	6.61888	0.710983	0.804102	up	2	0	6.2007	3.03553	11	46851974	46914687	+
7:78436732-78437176-	3.16517	6.61888	0.710983	0.804102	up	2	0	6.2007	3.03553	7	78436731	78437176	-
7:8410166-8433959-	3.16517	6.61888	0.710983	0.804102	up	2	0	6.2007	3.03553	7	8410165	8433959	-
X:108245722-108246224+	3.16517	6.61888	0.710983	0.804102	up	2	0	6.2007	3.03553	X	108245721	108246224	+
13:9821897-9833238-	3.16517	6.61888	0.710983	0.804102	up	2	0	6.2007	3.03553	13	9821896	9833238	-
X:54938978-54939133-	3.16517	6.61888	0.710983	0.804102	up	2	0	6.2007	3.03553	X	54938977	54939133	-
1:111318570-111338957+	3.16517	6.61888	0.710983	0.804102	up	2	0	6.2007	3.03553	1	111318569	111338957	+
3:162948135-162955783+	3.16517	6.61888	0.710983	0.804102	up	2	0	6.2007	3.03553	3	162948134	162955783	+
3:11255020-11265177+	3.16517	6.61888	0.710983	0.804102	up	2	0	6.2007	3.03553	3	11255019	11265177	+
2:105422280-105425029+	3.16517	6.61888	0.710983	0.804102	up	2	0	6.2007	3.03553	2	105422279	105425029	+
2:235456455-235460477+	3.16517	6.61888	0.710983	0.804102	up	2	0	6.2007	3.03553	2	235456454	235460477	+
3:220094177-220099671+	3.16517	6.61888	0.710983	0.804102	up	2	0	6.2007	3.03553	3	220094176	220099671	+
1:186263873-186264313+	3.16517	6.61888	0.710983	0.804102	up	2	0	6.2007	3.03553	1	186263872	186264313	+
X:107751835-107769470-	3.16517	6.61888	0.710983	0.804102	up	2	0	6.2007	3.03553	X	107751834	107769470	-
17:7412166-7427369-	3.16517	6.61888	0.710983	0.804102	up	2	0	6.2007	3.03553	17	7412165	7427369	-
21:40270029-40270202-	3.16517	6.61888	0.710983	0.804102	up	2	0	6.2007	3.03553	21	40270028	40270202	-
5:78160341-78223585+	3.16517	6.61888	0.710983	0.804102	up	2	0	6.2007	3.03553	5	78160340	78223585	+
7:76583391-76621402+	3.16517	6.61888	0.710983	0.804102	up	2	0	6.2007	3.03553	7	76583390	76621402	+
X:28060035-28100029-	3.16517	6.61888	0.710983	0.804102	up	2	0	6.2007	3.03553	X	28060034	28100029	-
2:35605481-35623657+	3.16517	6.61888	0.710983	0.804102	up	2	0	6.2007	3.03553	2	35605480	35623657	+
18:40660277-40661079-	3.16517	6.61888	0.710983	0.804102	up	2	0	6.2007	3.03553	18	40660276	40661079	-
13:21976184-21984123+	3.16517	6.61888	0.710983	0.804102	up	2	0	6.2007	3.03553	13	21976183	21984123	+
X:77267905-77279774+	3.16517	6.61888	0.710983	0.804102	up	2	0	6.2007	3.03553	X	77267904	77279774	+
7:70051541-70052535+	3.16517	6.61888	0.710983	0.804102	up	2	0	6.2007	3.03553	7	70051540	70052535	+
5:47227760-47228065-	3.16517	6.61888	0.710983	0.804102	up	2	0	6.2007	3.03553	5	47227759	47228065	-
11:54095519-54095966-	3.16517	6.61888	0.710983	0.804102	up	2	0	6.2007	3.03553	11	54095518	54095966	-
X:40697382-40708542+	3.16517	6.61888	0.710983	0.804102	up	2	0	6.2007	3.03553	X	40697381	40708542	+
19:32357781-32358592+	3.16517	6.61888	0.710983	0.804102	up	2	0	6.2007	3.03553	19	32357780	32358592	+
2:129458785-129484195+	3.16517	6.61888	0.710983	0.804102	up	2	0	6.2007	3.03553	2	129458784	129484195	+
9:77620454-77701923-	3.16517	6.61888	0.710983	0.804102	up	2	0	6.2007	3.03553	9	77620453	77701923	-
7:69272808-69275655-	3.16517	6.61888	0.710983	0.804102	up	2	0	6.2007	3.03553	7	69272807	69275655	-
4:71185174-71186343-	3.16517	6.61888	0.710983	0.804102	up	2	0	6.2007	3.03553	4	71185173	71186343	-
3:209587637-209589703+	3.16517	6.61888	0.710983	0.804102	up	2	0	6.2007	3.03553	3	209587636	209589703	+
1:104193422-104201083-	3.16517	6.61888	0.710983	0.804102	up	2	0	6.2007	3.03553	1	104193421	104201083	-
12:55288525-55288701+	3.16517	6.61888	0.710983	0.804102	up	2	0	6.2007	3.03553	12	55288524	55288701	+
3:188685431-188759852-	3.16517	6.61888	0.710983	0.804102	up	2	0	6.2007	3.03553	3	188685430	188759852	-
18:22190472-22191528+	3.16517	6.61888	0.710983	0.804102	up	2	0	6.2007	3.03553	18	22190471	22191528	+
22:43540280-43542616-	3.16517	6.61888	0.710983	0.804102	up	2	0	6.2007	3.03553	22	43540279	43542616	-
1:229939859-229948260+	3.16517	6.61888	0.710983	0.804102	up	2	0	6.2007	3.03553	1	229939858	229948260	+
6:67260670-67261213-	3.16517	6.61888	0.710983	0.804102	up	2	0	6.2007	3.03553	6	67260669	67261213	-
1:118432549-118432966-	3.16517	6.61888	0.710983	0.804102	up	2	0	6.2007	3.03553	1	118432548	118432966	-
20:46977719-46977922+	3.16517	6.61888	0.710983	0.804102	up	2	0	6.2007	3.03553	20	46977718	46977922	+
6:21992511-22016547+	3.16517	6.61888	0.710983	0.804102	up	2	0	6.2007	3.03553	6	21992510	22016547	+
7:99829822-99866416-	3.16517	6.61888	0.710983	0.804102	up	2	0	6.2007	3.03553	7	99829821	99866416	-
20:46142393-46144525+	3.16517	6.61888	0.710983	0.804102	up	2	0	6.2007	3.03553	20	46142392	46144525	+
25:19221522-19221846-	3.16517	6.61888	0.710983	0.804102	up	2	0	6.2007	3.03553	25	19221521	19221846	-
17:14050605-14063368-	3.16517	6.61888	0.710983	0.804102	up	2	0	6.2007	3.03553	17	14050604	14063368	-
1:67869125-67885777-	3.16517	6.61888	0.710983	0.804102	up	2	0	6.2007	3.03553	1	67869124	67885777	-
3:106287637-106294230+	3.16517	6.61888	0.710983	0.804102	up	2	0	6.2007	3.03553	3	106287636	106294230	+
7:15339699-15339978-	3.16517	6.61888	0.710983	0.804102	up	2	0	6.2007	3.03553	7	15339698	15339978	-
3:140370809-140372978+	3.16517	6.61888	0.710983	0.804102	up	2	0	6.2007	3.03553	3	140370808	140372978	+
11:54611568-54619216+	3.16517	6.61888	0.710983	0.804102	up	2	0	6.2007	3.03553	11	54611567	54619216	+
2:238482059-238482591+	3.16517	6.61888	0.710983	0.804102	up	2	0	6.2007	3.03553	2	238482058	238482591	+
17:39523185-39525287-	3.16517	6.61888	0.710983	0.804102	up	2	0	6.2007	3.03553	17	39523184	39525287	-
16:31170861-31202008-	3.16517	6.61888	0.710983	0.804102	up	2	0	6.2007	3.03553	16	31170860	31202008	-
26:18695940-18697541-	3.16517	6.61888	0.710983	0.804102	up	2	0	6.2007	3.03553	26	18695939	18697541	-
16:6955737-6960500-	3.16517	6.61888	0.710983	0.804102	up	2	0	6.2007	3.03553	16	6955736	6960500	-
1:93071299-93075160+	3.16517	6.61888	0.710983	0.804102	up	2	0	6.2007	3.03553	1	93071298	93075160	+
1:100269264-100269853-	3.16517	6.61888	0.710983	0.804102	up	2	0	6.2007	3.03553	1	100269263	100269853	-
8:88958357-88959713-	3.16517	6.61888	0.710983	0.804102	up	2	0	6.2007	3.03553	8	88958356	88959713	-
2:231257891-231260086-	3.16517	6.61888	0.710983	0.804102	up	2	0	6.2007	3.03553	2	231257890	231260086	-
2:72684488-72684676+	3.16517	6.61888	0.710983	0.804102	up	2	0	6.2007	3.03553	2	72684487	72684676	+
12:74640539-74696043-	3.16517	6.61888	0.710983	0.804102	up	2	0	6.2007	3.03553	12	74640538	74696043	-
2:225123895-225124529-	3.16517	6.61888	0.710983	0.804102	up	2	0	6.2007	3.03553	2	225123894	225124529	-
2:155840817-155885603-	3.16517	6.61888	0.710983	0.804102	up	2	0	6.2007	3.03553	2	155840816	155885603	-
26:25208928-25295094+	3.16517	6.61888	0.710983	0.804102	up	2	0	6.2007	3.03553	26	25208927	25295094	+
3:170646020-170667987-	3.16517	6.61888	0.710983	0.804102	up	2	0	6.2007	3.03553	3	170646019	170667987	-
3:11238613-11265177+	3.16517	6.61888	0.710983	0.804102	up	2	0	6.2007	3.03553	3	11238612	11265177	+
1:186262871-186263030-	3.16517	6.61888	0.710983	0.804102	up	2	0	6.2007	3.03553	1	186262870	186263030	-
3:46611950-46680245+	3.16517	6.61888	0.710983	0.804102	up	2	0	6.2007	3.03553	3	46611949	46680245	+
3:34496077-34502590+	3.16517	6.61888	0.710983	0.804102	up	2	0	6.2007	3.03553	3	34496076	34502590	+
X:954422-984696-	3.16517	6.61888	0.710983	0.804102	up	2	0	6.2007	3.03553	X	954421	984696	-
25:10177949-10181238+	3.16517	6.61888	0.710983	0.804102	up	2	0	6.2007	3.03553	25	10177948	10181238	+
17:71273219-71274975+	3.16517	6.61888	0.710983	0.804102	up	2	0	6.2007	3.03553	17	71273218	71274975	+
3:105978807-105990447+	3.16517	6.61888	0.710983	0.804102	up	2	0	6.2007	3.03553	3	105978806	105990447	+
8:1817681-1823122-	3.16517	6.61888	0.710983	0.804102	up	2	0	6.2007	3.03553	8	1817680	1823122	-
6:19463905-19479865-	3.16517	6.61888	0.710983	0.804102	up	2	0	6.2007	3.03553	6	19463904	19479865	-
17:28740369-28748927-	3.16517	6.61888	0.710983	0.804102	up	2	0	6.2007	3.03553	17	28740368	28748927	-
6:108333395-108333665+	3.16517	6.61888	0.710983	0.804102	up	2	0	6.2007	3.03553	6	108333394	108333665	+
2:116255864-116256745-	3.16517	6.61888	0.710983	0.804102	up	2	0	6.2007	3.03553	2	116255863	116256745	-
2:12909984-12919711+	3.16517	6.61888	0.710983	0.804102	up	2	0	6.2007	3.03553	2	12909983	12919711	+
X:118450955-118451131+	3.16517	6.61888	0.710983	0.804102	up	2	0	6.2007	3.03553	X	118450954	118451131	+
8:32299308-32300159+	3.16517	6.61888	0.710983	0.804102	up	2	0	6.2007	3.03553	8	32299307	32300159	+
1:213902449-213925284+	3.16517	6.61888	0.710983	0.804102	up	2	0	6.2007	3.03553	1	213902448	213925284	+
11:9545142-9562383-	3.16517	6.61888	0.710983	0.804102	up	2	0	6.2007	3.03553	11	9545141	9562383	-
18:40275708-40275858-	3.16517	6.61888	0.710983	0.804102	up	2	0	6.2007	3.03553	18	40275707	40275858	-
2:216309230-216309918+	3.16517	6.61888	0.710983	0.804102	up	2	0	6.2007	3.03553	2	216309229	216309918	+
11:53717195-53728309-	3.16517	6.61888	0.710983	0.804102	up	2	0	6.2007	3.03553	11	53717194	53728309	-
1:120198913-120199191+	3.16517	6.61888	0.710983	0.804102	up	2	0	6.2007	3.03553	1	120198912	120199191	+
18:55291453-55291894+	3.16517	6.61888	0.710983	0.804102	up	2	0	6.2007	3.03553	18	55291452	55291894	+
16:35894629-35909501-	3.16517	6.61888	0.710983	0.804102	up	2	0	6.2007	3.03553	16	35894628	35909501	-
11:35769518-35770952-	3.16517	6.61888	0.710983	0.804102	up	2	0	6.2007	3.03553	11	35769517	35770952	-
5:66266849-66268896+	3.16517	6.61888	0.710983	0.804102	up	2	0	6.2007	3.03553	5	66266848	66268896	+
4:63796084-63796363-	3.16517	6.61888	0.710983	0.804102	up	2	0	6.2007	3.03553	4	63796083	63796363	-
6:58350083-58352787+	3.16517	6.61888	0.710983	0.804102	up	2	0	6.2007	3.03553	6	58350082	58352787	+
19:10573774-10588475+	3.16517	6.61888	0.710983	0.804102	up	2	0	6.2007	3.03553	19	10573773	10588475	+
18:15687039-15689405+	3.16517	6.61888	0.710983	0.804102	up	2	0	6.2007	3.03553	18	15687038	15689405	+
24:17053727-17058742-	3.16517	6.61888	0.710983	0.804102	up	2	0	6.2007	3.03553	24	17053726	17058742	-
26:25910591-25911011+	3.16517	6.61888	0.710983	0.804102	up	2	0	6.2007	3.03553	26	25910590	25911011	+
3:75937861-75938547-	3.16517	6.61888	0.710983	0.804102	up	2	0	6.2007	3.03553	3	75937860	75938547	-
22:38961009-38971374+	3.16517	6.61888	0.710983	0.804102	up	2	0	6.2007	3.03553	22	38961008	38971374	+
3:188007663-188017391+	3.16517	6.61888	0.710983	0.804102	up	2	0	6.2007	3.03553	3	188007662	188017391	+
3:76545346-76546254+	3.16517	6.61888	0.710983	0.804102	up	2	0	6.2007	3.03553	3	76545345	76546254	+
16:58392055-58400356-	3.16517	6.61888	0.710983	0.804102	up	2	0	6.2007	3.03553	16	58392054	58400356	-
2:32673248-32674403-	3.16517	6.61888	0.710983	0.804102	up	2	0	6.2007	3.03553	2	32673247	32674403	-
1:69584645-69659705+	3.16517	6.61888	0.710983	0.804102	up	2	0	6.2007	3.03553	1	69584644	69659705	+
15:4812866-4827359-	3.16517	6.61888	0.710983	0.804102	up	2	0	6.2007	3.03553	15	4812865	4827359	-
22:43414121-43419652+	3.16517	6.61888	0.710983	0.804102	up	2	0	6.2007	3.03553	22	43414120	43419652	+
6:29721616-29721777+	3.16517	6.61888	0.710983	0.804102	up	2	0	6.2007	3.03553	6	29721615	29721777	+
5:107689001-107726130+	3.16517	6.61888	0.710983	0.804102	up	2	0	6.2007	3.03553	5	107689000	107726130	+
4:43399714-43406758-	3.16517	6.61888	0.710983	0.804102	up	2	0	6.2007	3.03553	4	43399713	43406758	-
18:21833526-21885177+	3.16517	6.61888	0.710983	0.804102	up	2	0	6.2007	3.03553	18	21833525	21885177	+
6:92107481-92111142-	3.16517	6.61888	0.710983	0.804102	up	2	0	6.2007	3.03553	6	92107480	92111142	-
5:43553297-43553779+	3.16517	6.61888	0.710983	0.804102	up	2	0	6.2007	3.03553	5	43553296	43553779	+
2:177772647-177779877-	3.16517	6.61888	0.710983	0.804102	up	2	0	6.2007	3.03553	2	177772646	177779877	-
24:14159074-14159237+	3.16517	6.61888	0.710983	0.804102	up	2	0	6.2007	3.03553	24	14159073	14159237	+
10:34676992-34679312-	3.16517	6.61888	0.710983	0.804102	up	2	0	6.2007	3.03553	10	34676991	34679312	-
17:346458-359124+	3.16517	6.61888	0.710983	0.804102	up	2	0	6.2007	3.03553	17	346457	359124	+
6:36419403-36421436+	3.16517	6.61888	0.710983	0.804102	up	2	0	6.2007	3.03553	6	36419402	36421436	+
1:68247900-68269487+	3.16517	6.61888	0.710983	0.804102	up	2	0	6.2007	3.03553	1	68247899	68269487	+
17:61680611-61684364-	3.16517	6.61888	0.710983	0.804102	up	2	0	6.2007	3.03553	17	61680610	61684364	-
25:24339533-24357549-	3.16517	6.61888	0.710983	0.804102	up	2	0	6.2007	3.03553	25	24339532	24357549	-
6:69760284-69760440+	3.16517	6.61888	0.710983	0.804102	up	2	0	6.2007	3.03553	6	69760283	69760440	+
4:46180260-46180477+	3.16517	6.61888	0.710983	0.804102	up	2	0	6.2007	3.03553	4	46180259	46180477	+
1:97096580-97100071+	3.16517	6.61888	0.710983	0.804102	up	2	0	6.2007	3.03553	1	97096579	97100071	+
6:87360805-87361211-	3.16517	6.61888	0.710983	0.804102	up	2	0	6.2007	3.03553	6	87360804	87361211	-
1:236666822-236667450+	3.16517	6.61888	0.710983	0.804102	up	2	0	6.2007	3.03553	1	236666821	236667450	+
18:39118012-39190590-	3.16517	6.61888	0.710983	0.804102	up	2	0	6.2007	3.03553	18	39118011	39190590	-
10:22238698-22239812-	3.16517	6.61888	0.710983	0.804102	up	2	0	6.2007	3.03553	10	22238697	22239812	-
X:78019155-78019699+	3.16517	6.61888	0.710983	0.804102	up	2	0	6.2007	3.03553	X	78019154	78019699	+
X:11186602-11198021+	3.16517	6.61888	0.710983	0.804102	up	2	0	6.2007	3.03553	X	11186601	11198021	+
21:28591219-28599230-	3.16517	6.61888	0.710983	0.804102	up	2	0	6.2007	3.03553	21	28591218	28599230	-
18:48110793-48126173+	3.16517	6.61888	0.710983	0.804102	up	2	0	6.2007	3.03553	18	48110792	48126173	+
2:16115557-16134262-	3.16517	6.61888	0.710983	0.804102	up	2	0	6.2007	3.03553	2	16115556	16134262	-
1:188534951-188549353-	3.16517	6.61888	0.710983	0.804102	up	2	0	6.2007	3.03553	1	188534950	188549353	-
11:17792470-17796280-	3.16517	6.61888	0.710983	0.804102	up	2	0	6.2007	3.03553	11	17792469	17796280	-
2:208725826-208743765+	3.16517	6.61888	0.710983	0.804102	up	2	0	6.2007	3.03553	2	208725825	208743765	+
8:61683392-61716387-	3.16517	6.61888	0.710983	0.804102	up	2	0	6.2007	3.03553	8	61683391	61716387	-
5:31837317-31844995-	3.16517	6.61888	0.710983	0.804102	up	2	0	6.2007	3.03553	5	31837316	31844995	-
6:41003328-41004065-	3.16517	6.61888	0.710983	0.804102	up	2	0	6.2007	3.03553	6	41003327	41004065	-
6:69772824-69774082-	3.16517	6.61888	0.710983	0.804102	up	2	0	6.2007	3.03553	6	69772823	69774082	-
16:26258023-26261916-	3.16517	6.61888	0.710983	0.804102	up	2	0	6.2007	3.03553	16	26258022	26261916	-
7:44023759-44024008+	3.16517	6.61888	0.710983	0.804102	up	2	0	6.2007	3.03553	7	44023758	44024008	+
1:196671192-196678278-	3.16517	6.61888	0.710983	0.804102	up	2	0	6.2007	3.03553	1	196671191	196678278	-
19:51979726-51985897+	3.16517	6.61888	0.710983	0.804102	up	2	0	6.2007	3.03553	19	51979725	51985897	+
19:43191056-43191614+	3.16517	6.61888	0.710983	0.804102	up	2	0	6.2007	3.03553	19	43191055	43191614	+
11:10252073-10280722-	3.16517	6.61888	0.710983	0.804102	up	2	0	6.2007	3.03553	11	10252072	10280722	-
7:97082715-97126110-	3.16517	6.61888	0.710983	0.804102	up	2	0	6.2007	3.03553	7	97082714	97126110	-
3:112178982-112188893-	3.16517	6.61888	0.710983	0.804102	up	2	0	6.2007	3.03553	3	112178981	112188893	-
21:16618420-16627949+	3.16517	6.61888	0.710983	0.804102	up	2	0	6.2007	3.03553	21	16618419	16627949	+
22:15279073-15288729+	3.16517	6.61888	0.710983	0.804102	up	2	0	6.2007	3.03553	22	15279072	15288729	+
1:18744517-18745477-	3.16517	6.61888	0.710983	0.804102	up	2	0	6.2007	3.03553	1	18744516	18745477	-
2:233489602-233494756-	3.16517	6.61888	0.710983	0.804102	up	2	0	6.2007	3.03553	2	233489601	233494756	-
12:932743-951875+	3.16517	6.61888	0.710983	0.804102	up	2	0	6.2007	3.03553	12	932742	951875	+
8:80439677-80453462+	3.16517	6.61888	0.710983	0.804102	up	2	0	6.2007	3.03553	8	80439676	80453462	+
9:37440522-37445387+	3.16517	6.61888	0.710983	0.804102	up	2	0	6.2007	3.03553	9	37440521	37445387	+
4:44837710-44843543-	3.16517	6.61888	0.710983	0.804102	up	2	0	6.2007	3.03553	4	44837709	44843543	-
5:1110737-1114888+	3.16517	6.61888	0.710983	0.804102	up	2	0	6.2007	3.03553	5	1110736	1114888	+
7:25558423-25567914+	3.16517	6.61888	0.710983	0.804102	up	2	0	6.2007	3.03553	7	25558422	25567914	+
13:35944531-35945451+	3.16517	6.61888	0.710983	0.804102	up	2	0	6.2007	3.03553	13	35944530	35945451	+
26:32950270-32996334+	3.16517	6.61888	0.710983	0.804102	up	2	0	6.2007	3.03553	26	32950269	32996334	+
16:58357364-58358235-	3.16517	6.61888	0.710983	0.804102	up	2	0	6.2007	3.03553	16	58357363	58358235	-
21:40262655-40263051-	3.16517	6.61888	0.710983	0.804102	up	2	0	6.2007	3.03553	21	40262654	40263051	-
11:10251967-10291674+	3.16517	6.61888	0.710983	0.804102	up	2	0	6.2007	3.03553	11	10251966	10291674	+
9:86014764-86016253+	3.16517	6.61888	0.710983	0.804102	up	2	0	6.2007	3.03553	9	86014763	86016253	+
3:183202029-183239679+	3.16517	6.61888	0.710983	0.804102	up	2	0	6.2007	3.03553	3	183202028	183239679	+
2:85252954-85264027+	3.16517	6.61888	0.710983	0.804102	up	2	0	6.2007	3.03553	2	85252953	85264027	+
4:43506878-43507239+	3.16517	6.61888	0.710983	0.804102	up	2	0	6.2007	3.03553	4	43506877	43507239	+
7:58190963-58206346-	3.16517	6.61888	0.710983	0.804102	up	2	0	6.2007	3.03553	7	58190962	58206346	-
3:86935261-86943842+	3.16517	6.61888	0.710983	0.804102	up	2	0	6.2007	3.03553	3	86935260	86943842	+
5:43558304-43576392+	3.16517	6.61888	0.710983	0.804102	up	2	0	6.2007	3.03553	5	43558303	43576392	+
7:14752696-14757651+	3.16517	6.61888	0.710983	0.804102	up	2	0	6.2007	3.03553	7	14752695	14757651	+
11:10659150-10666907+	3.16517	6.61888	0.710983	0.804102	up	2	0	6.2007	3.03553	11	10659149	10666907	+
25:24576265-24578673+	3.16517	6.61888	0.710983	0.804102	up	2	0	6.2007	3.03553	25	24576264	24578673	+
13:67058606-67059029+	3.16517	6.61888	0.710983	0.804102	up	2	0	6.2007	3.03553	13	67058605	67059029	+
1:20690962-20691153-	3.16517	6.61888	0.710983	0.804102	up	2	0	6.2007	3.03553	1	20690961	20691153	-
7:2199298-2199590+	3.16517	6.61888	0.710983	0.804102	up	2	0	6.2007	3.03553	7	2199297	2199590	+
23:61483071-61486469+	3.16517	6.61888	0.710983	0.804102	up	2	0	6.2007	3.03553	23	61483070	61486469	+
13:61028698-61029025-	3.16517	6.61888	0.710983	0.804102	up	2	0	6.2007	3.03553	13	61028697	61029025	-
3:12608569-12680030-	3.16517	6.61888	0.710983	0.804102	up	2	0	6.2007	3.03553	3	12608568	12680030	-
11:12300659-12322473+	3.16517	6.61888	0.710983	0.804102	up	2	0	6.2007	3.03553	11	12300658	12322473	+
13:6621855-6696669-	3.16517	6.61888	0.710983	0.804102	up	2	0	6.2007	3.03553	13	6621854	6696669	-
11:35831271-35831480-	3.16517	6.61888	0.710983	0.804102	up	2	0	6.2007	3.03553	11	35831270	35831480	-
1:69089769-69119868-	3.16517	6.61888	0.710983	0.804102	up	2	0	6.2007	3.03553	1	69089768	69119868	-
5:54419283-54488041-	3.16517	6.61888	0.710983	0.804102	up	2	0	6.2007	3.03553	5	54419282	54488041	-
3:90543845-90584765-	3.16517	6.61888	0.710983	0.804102	up	2	0	6.2007	3.03553	3	90543844	90584765	-
7:3824151-3844711-	3.16517	6.61888	0.710983	0.804102	up	2	0	6.2007	3.03553	7	3824150	3844711	-
5:44180385-44181181+	3.16517	6.61888	0.710983	0.804102	up	2	0	6.2007	3.03553	5	44180384	44181181	+
5:10364149-10366711+	3.16517	6.61888	0.710983	0.804102	up	2	0	6.2007	3.03553	5	10364148	10366711	+
15:19949213-19967066+	3.16517	6.61888	0.710983	0.804102	up	2	0	6.2007	3.03553	15	19949212	19967066	+
26:18856113-18875180-	3.16517	6.61888	0.710983	0.804102	up	2	0	6.2007	3.03553	26	18856112	18875180	-
6:36212069-36234171-	3.16517	6.61888	0.710983	0.804102	up	2	0	6.2007	3.03553	6	36212068	36234171	-
13:17130652-17140962-	3.16517	6.61888	0.710983	0.804102	up	2	0	6.2007	3.03553	13	17130651	17140962	-
4:86539221-86555897-	3.16517	6.61888	0.710983	0.804102	up	2	0	6.2007	3.03553	4	86539220	86555897	-
23:37306600-37347057+	3.16517	6.61888	0.710983	0.804102	up	2	0	6.2007	3.03553	23	37306599	37347057	+
19:47923693-47932306+	3.16517	6.61888	0.710983	0.804102	up	2	0	6.2007	3.03553	19	47923692	47932306	+
19:21089929-21090167+	3.16517	6.61888	0.710983	0.804102	up	2	0	6.2007	3.03553	19	21089928	21090167	+
26:17987357-17992836-	3.16517	6.61888	0.710983	0.804102	up	2	0	6.2007	3.03553	26	17987356	17992836	-
2:58686611-58686855+	3.16517	6.61888	0.710983	0.804102	up	2	0	6.2007	3.03553	2	58686610	58686855	+
23:22028535-22028935-	3.16517	6.61888	0.710983	0.804102	up	2	0	6.2007	3.03553	23	22028534	22028935	-
22:39794832-39833776+	3.16517	6.61888	0.710983	0.804102	up	2	0	6.2007	3.03553	22	39794831	39833776	+
1:77399563-77421654+	3.16517	6.61888	0.710983	0.804102	up	2	0	6.2007	3.03553	1	77399562	77421654	+
2:48390480-48391089-	3.16517	6.61888	0.710983	0.804102	up	2	0	6.2007	3.03553	2	48390479	48391089	-
21:21939126-21943012-	3.16517	6.61888	0.710983	0.804102	up	2	0	6.2007	3.03553	21	21939125	21943012	-
1:215273054-215294653+	3.16517	6.61888	0.710983	0.804102	up	2	0	6.2007	3.03553	1	215273053	215294653	+
8:57077347-57077660+	3.16517	6.61888	0.710983	0.804102	up	2	0	6.2007	3.03553	8	57077346	57077660	+
18:66108591-66126878+	3.16517	6.61888	0.710983	0.804102	up	2	0	6.2007	3.03553	18	66108590	66126878	+
14:51311410-51311706-	3.16517	6.61888	0.710983	0.804102	up	2	0	6.2007	3.03553	14	51311409	51311706	-
6:36521603-36526454+	3.16517	6.61888	0.710983	0.804102	up	2	0	6.2007	3.03553	6	36521602	36526454	+
13:50991179-50991345-	3.16517	6.61888	0.710983	0.804102	up	2	0	6.2007	3.03553	13	50991178	50991345	-
13:65310573-65310815-	3.16517	6.61888	0.710983	0.804102	up	2	0	6.2007	3.03553	13	65310572	65310815	-
21:48669012-48669290-	3.16517	6.61888	0.710983	0.804102	up	2	0	6.2007	3.03553	21	48669011	48669290	-
6:7238038-7239182-	3.16517	6.61888	0.710983	0.804102	up	2	0	6.2007	3.03553	6	7238037	7239182	-
26:18014575-18021457-	3.16517	6.61888	0.710983	0.804102	up	2	0	6.2007	3.03553	26	18014574	18021457	-
23:60924070-60924236+	3.16517	6.61888	0.710983	0.804102	up	2	0	6.2007	3.03553	23	60924069	60924236	+
21:40263957-40265677-	3.16517	6.61888	0.710983	0.804102	up	2	0	6.2007	3.03553	21	40263956	40265677	-
14:13046005-13047184+	3.16517	6.61888	0.710983	0.804102	up	2	0	6.2007	3.03553	14	13046004	13047184	+
3:127426960-127427316-	3.16517	6.61888	0.710983	0.804102	up	2	0	6.2007	3.03553	3	127426959	127427316	-
7:18521998-18529105-	3.16517	6.61888	0.710983	0.804102	up	2	0	6.2007	3.03553	7	18521997	18529105	-
3:32176349-32180551-	3.16517	6.61888	0.710983	0.804102	up	2	0	6.2007	3.03553	3	32176348	32180551	-
12:21761734-21761917+	3.16517	6.61888	0.710983	0.804102	up	2	0	6.2007	3.03553	12	21761733	21761917	+
19:42967782-42969921-	3.16517	6.61888	0.710983	0.804102	up	2	0	6.2007	3.03553	19	42967781	42969921	-
12:32109999-32110278+	3.16517	6.61888	0.710983	0.804102	up	2	0	6.2007	3.03553	12	32109998	32110278	+
19:49496045-49503593-	3.16517	6.61888	0.710983	0.804102	up	2	0	6.2007	3.03553	19	49496044	49503593	-
4:103317256-103337498-	3.16517	6.61888	0.710983	0.804102	up	2	0	6.2007	3.03553	4	103317255	103337498	-
14:57027394-57036442+	3.16517	6.61888	0.710983	0.804102	up	2	0	6.2007	3.03553	14	57027393	57036442	+
10:15718997-15780411+	3.16517	6.61888	0.710983	0.804102	up	2	0	6.2007	3.03553	10	15718996	15780411	+
13:29130754-29152249-	3.16517	6.61888	0.710983	0.804102	up	2	0	6.2007	3.03553	13	29130753	29152249	-
16:41460580-41463768-	3.16517	6.61888	0.710983	0.804102	up	2	0	6.2007	3.03553	16	41460579	41463768	-
X:40857363-40870508-	3.16517	6.61888	0.710983	0.804102	up	2	0	6.2007	3.03553	X	40857362	40870508	-
11:19336784-19346726+	3.16517	6.61888	0.710983	0.804102	up	2	0	6.2007	3.03553	11	19336783	19346726	+
25:5298904-5308661-	3.16517	6.61888	0.710983	0.804102	up	2	0	6.2007	3.03553	25	5298903	5308661	-
11:35214260-35264298+	3.16517	6.61888	0.710983	0.804102	up	2	0	6.2007	3.03553	11	35214259	35264298	+
5:85649338-85649547+	3.16517	6.61888	0.710983	0.804102	up	2	0	6.2007	3.03553	5	85649337	85649547	+
16:39003911-39008796+	3.16517	6.61888	0.710983	0.804102	up	2	0	6.2007	3.03553	16	39003910	39008796	+
4:27547859-27594338+	3.16517	6.61888	0.710983	0.804102	up	2	0	6.2007	3.03553	4	27547858	27594338	+
21:31622517-31684396-	3.16517	6.61888	0.710983	0.804102	up	2	0	6.2007	3.03553	21	31622516	31684396	-
23:56159720-56162347-	3.16517	6.61888	0.710983	0.804102	up	2	0	6.2007	3.03553	23	56159719	56162347	-
12:24605527-24607062+	3.16517	6.61888	0.710983	0.804102	up	2	0	6.2007	3.03553	12	24605526	24607062	+
7:41981348-41985156-	3.16517	6.61888	0.710983	0.804102	up	2	0	6.2007	3.03553	7	41981347	41985156	-
6:110372653-110383104-	3.16517	6.61888	0.710983	0.804102	up	2	0	6.2007	3.03553	6	110372652	110383104	-
4:94173842-94178110-	3.16517	6.61888	0.710983	0.804102	up	2	0	6.2007	3.03553	4	94173841	94178110	-
18:33476680-33512885-	3.16517	6.61888	0.710983	0.804102	up	2	0	6.2007	3.03553	18	33476679	33512885	-
13:42741528-42839600+	3.16517	6.61888	0.710983	0.804102	up	2	0	6.2007	3.03553	13	42741527	42839600	+
3:31682720-31684200-	3.16517	6.61888	0.710983	0.804102	up	2	0	6.2007	3.03553	3	31682719	31684200	-
21:35275989-35276752+	3.16517	6.61888	0.710983	0.804102	up	2	0	6.2007	3.03553	21	35275988	35276752	+
17:61924471-61941789+	3.16517	6.61888	0.710983	0.804102	up	2	0	6.2007	3.03553	17	61924470	61941789	+
9:77402159-77433052-	3.16517	6.61888	0.710983	0.804102	up	2	0	6.2007	3.03553	9	77402158	77433052	-
1:224227490-224228942-	3.16517	6.61888	0.710983	0.804102	up	2	0	6.2007	3.03553	1	224227489	224228942	-
26:38801319-38812872-	3.16517	6.61888	0.710983	0.804102	up	2	0	6.2007	3.03553	26	38801318	38812872	-
25:8989594-8997577-	3.16517	6.61888	0.710983	0.804102	up	2	0	6.2007	3.03553	25	8989593	8997577	-
X:48484214-48486110-	3.16517	6.61888	0.710983	0.804102	up	2	0	6.2007	3.03553	X	48484213	48486110	-
25:25366704-25367405+	3.16517	6.61888	0.710983	0.804102	up	2	0	6.2007	3.03553	25	25366703	25367405	+
2:202282758-202313777-	3.16517	6.61888	0.710983	0.804102	up	2	0	6.2007	3.03553	2	202282757	202313777	-
2:13326868-13338534-	3.16517	6.61888	0.710983	0.804102	up	2	0	6.2007	3.03553	2	13326867	13338534	-
3:135701318-135710345-	3.16517	6.61888	0.710983	0.804102	up	2	0	6.2007	3.03553	3	135701317	135710345	-
20:27364423-27366233-	3.16517	6.61888	0.710983	0.804102	up	2	0	6.2007	3.03553	20	27364422	27366233	-
12:58474386-58499336+	3.16517	6.61888	0.710983	0.804102	up	2	0	6.2007	3.03553	12	58474385	58499336	+
1:205922772-205940750-	3.16517	6.61888	0.710983	0.804102	up	2	0	6.2007	3.03553	1	205922771	205940750	-
5:67945733-67945883-	3.16517	6.61888	0.710983	0.804102	up	2	0	6.2007	3.03553	5	67945732	67945883	-
21:9004002-9029932+	3.16517	6.61888	0.710983	0.804102	up	2	0	6.2007	3.03553	21	9004001	9029932	+
3:99479815-99491575-	3.16517	6.61888	0.710983	0.804102	up	2	0	6.2007	3.03553	3	99479814	99491575	-
2:130617834-130628921-	3.16517	6.61888	0.710983	0.804102	up	2	0	6.2007	3.03553	2	130617833	130628921	-
3:124340397-124346128+	3.16517	6.61888	0.710983	0.804102	up	2	0	6.2007	3.03553	3	124340396	124346128	+
3:215607531-215614670+	3.16517	6.61888	0.710983	0.804102	up	2	0	6.2007	3.03553	3	215607530	215614670	+
23:25555997-25561999+	3.16517	6.61888	0.710983	0.804102	up	2	0	6.2007	3.03553	23	25555996	25561999	+
18:29125647-29127791+	3.16517	6.61888	0.710983	0.804102	up	2	0	6.2007	3.03553	18	29125646	29127791	+
8:1814203-1816268-	3.16517	6.61888	0.710983	0.804102	up	2	0	6.2007	3.03553	8	1814202	1816268	-
3:25726617-25732625-	3.16517	6.61888	0.710983	0.804102	up	2	0	6.2007	3.03553	3	25726616	25732625	-
15:21490870-21491189+	3.16517	6.61888	0.710983	0.804102	up	2	0	6.2007	3.03553	15	21490869	21491189	+
18:9765932-9766286+	3.16517	6.61888	0.710983	0.804102	up	2	0	6.2007	3.03553	18	9765931	9766286	+
15:63666931-63678629+	3.16517	6.61888	0.710983	0.804102	up	2	0	6.2007	3.03553	15	63666930	63678629	+
3:136358682-136358999+	3.16517	6.61888	0.710983	0.804102	up	2	0	6.2007	3.03553	3	136358681	136358999	+
1:69877505-69890654+	3.16517	6.61888	0.710983	0.804102	up	2	0	6.2007	3.03553	1	69877504	69890654	+
12:25590351-25592607-	3.16517	6.61888	0.710983	0.804102	up	2	0	6.2007	3.03553	12	25590350	25592607	-
7:1445124-1499937+	3.16517	6.61888	0.710983	0.804102	up	2	0	6.2007	3.03553	7	1445123	1499937	+
11:42837838-42842876+	3.16517	6.61888	0.710983	0.804102	up	2	0	6.2007	3.03553	11	42837837	42842876	+
2:202692205-202712786+	3.16517	6.61888	0.710983	0.804102	up	2	0	6.2007	3.03553	2	202692204	202712786	+
16:6961699-6962360+	3.16517	6.61888	0.710983	0.804102	up	2	0	6.2007	3.03553	16	6961698	6962360	+
5:84302961-84323376+	3.16517	6.61888	0.710983	0.804102	up	2	0	6.2007	3.03553	5	84302960	84323376	+
2:112529883-112538418-	3.16517	6.61888	0.710983	0.804102	up	2	0	6.2007	3.03553	2	112529882	112538418	-
2:206178008-206200463+	3.16517	6.61888	0.710983	0.804102	up	2	0	6.2007	3.03553	2	206178007	206200463	+
12:58635289-58636807-	3.16517	6.61888	0.710983	0.804102	up	2	0	6.2007	3.03553	12	58635288	58636807	-
X:62608921-62609072+	3.16517	6.61888	0.710983	0.804102	up	2	0	6.2007	3.03553	X	62608920	62609072	+
9:35914123-35916766+	3.16517	6.61888	0.710983	0.804102	up	2	0	6.2007	3.03553	9	35914122	35916766	+
17:12151693-12236918+	3.16517	6.61888	0.710983	0.804102	up	2	0	6.2007	3.03553	17	12151692	12236918	+
5:12102844-12103126+	3.16517	6.61888	0.710983	0.804102	up	2	0	6.2007	3.03553	5	12102843	12103126	+
9:74059535-74068146-	3.16517	6.61888	0.710983	0.804102	up	2	0	6.2007	3.03553	9	74059534	74068146	-
15:20091249-20165176-	3.16517	6.61888	0.710983	0.804102	up	2	0	6.2007	3.03553	15	20091248	20165176	-
3:90602654-90647874-	3.16517	6.61888	0.710983	0.804102	up	2	0	6.2007	3.03553	3	90602653	90647874	-
4:19065933-19144242+	3.16517	6.61888	0.710983	0.804102	up	2	0	6.2007	3.03553	4	19065932	19144242	+
3:70202369-70209929+	3.16517	6.61888	0.710983	0.804102	up	2	0	6.2007	3.03553	3	70202368	70209929	+
5:84302961-84340977+	3.16517	6.61888	0.710983	0.804102	up	2	0	6.2007	3.03553	5	84302960	84340977	+
5:90273851-90364583-	3.16517	6.61888	0.710983	0.804102	up	2	0	6.2007	3.03553	5	90273850	90364583	-
1:139633065-139680523-	3.16517	6.61888	0.710983	0.804102	up	2	0	6.2007	3.03553	1	139633064	139680523	-
1:187687212-187695454+	3.16517	6.61888	0.710983	0.804102	up	2	0	6.2007	3.03553	1	187687211	187695454	+
13:17876216-17930781+	3.16517	6.61888	0.710983	0.804102	up	2	0	6.2007	3.03553	13	17876215	17930781	+
13:59527235-59527546+	3.16517	6.61888	0.710983	0.804102	up	2	0	6.2007	3.03553	13	59527234	59527546	+
9:33868144-33868409-	3.16517	6.61888	0.710983	0.804102	up	2	0	6.2007	3.03553	9	33868143	33868409	-
1:250958654-251008832-	3.16517	6.61888	0.710983	0.804102	up	2	0	6.2007	3.03553	1	250958653	251008832	-
4:90703567-90711045-	3.16517	6.61888	0.710983	0.804102	up	2	0	6.2007	3.03553	4	90703566	90711045	-
3:195250820-195262271-	3.16517	6.61888	0.710983	0.804102	up	2	0	6.2007	3.03553	3	195250819	195262271	-
6:29349314-29349604+	3.16517	6.61888	0.710983	0.804102	up	2	0	6.2007	3.03553	6	29349313	29349604	+
2:49852351-49856819-	3.16517	6.61888	0.710983	0.804102	up	2	0	6.2007	3.03553	2	49852350	49856819	-
16:4839121-4844043+	3.16517	6.61888	0.710983	0.804102	up	2	0	6.2007	3.03553	16	4839120	4844043	+
18:13218977-13229370-	3.16517	6.61888	0.710983	0.804102	up	2	0	6.2007	3.03553	18	13218976	13229370	-
4:26427992-26507594-	3.16517	6.61888	0.710983	0.804102	up	2	0	6.2007	3.03553	4	26427991	26507594	-
21:40266132-40266770+	3.16517	6.61888	0.710983	0.804102	up	2	0	6.2007	3.03553	21	40266131	40266770	+
3:220213400-220213826+	3.16517	6.61888	0.710983	0.804102	up	2	0	6.2007	3.03553	3	220213399	220213826	+
21:28613784-28627247-	3.16517	6.61888	0.710983	0.804102	up	2	0	6.2007	3.03553	21	28613783	28627247	-
15:4129963-4130221-	3.16517	6.61888	0.710983	0.804102	up	2	0	6.2007	3.03553	15	4129962	4130221	-
JH922272.1:24964-25471-	3.16517	6.61888	0.710983	0.804102	up	2	0	6.2007	3.03553	JH922272.1	24963	25471	-
14:13739188-13761741+	3.16517	6.61888	0.710983	0.804102	up	2	0	6.2007	3.03553	14	13739187	13761741	+
7:58174233-58182439+	3.16517	6.61888	0.710983	0.804102	up	2	0	6.2007	3.03553	7	58174232	58182439	+
16:22085072-22088595-	3.16517	6.61888	0.710983	0.804102	up	2	0	6.2007	3.03553	16	22085071	22088595	-
7:35413764-35431112+	3.16517	6.61888	0.710983	0.804102	up	2	0	6.2007	3.03553	7	35413763	35431112	+
2:237635394-237636613-	3.16517	6.61888	0.710983	0.804102	up	2	0	6.2007	3.03553	2	237635393	237636613	-
23:937104-965428-	3.16517	6.61888	0.710983	0.804102	up	2	0	6.2007	3.03553	23	937103	965428	-
X:107778059-107778841-	3.16517	6.61888	0.710983	0.804102	up	2	0	6.2007	3.03553	X	107778058	107778841	-
18:53702196-53731466+	3.16517	6.61888	0.710983	0.804102	up	2	0	6.2007	3.03553	18	53702195	53731466	+
6:44672297-44672571+	3.16517	6.61888	0.710983	0.804102	up	2	0	6.2007	3.03553	6	44672296	44672571	+
4:117613161-117620852-	3.16517	6.61888	0.710983	0.804102	up	2	0	6.2007	3.03553	4	117613160	117620852	-
1:96708902-96716083-	3.16517	6.61888	0.710983	0.804102	up	2	0	6.2007	3.03553	1	96708901	96716083	-
7:43274346-43326207+	3.16517	6.61888	0.710983	0.804102	up	2	0	6.2007	3.03553	7	43274345	43326207	+
X:72469694-72471723+	3.16517	6.61888	0.710983	0.804102	up	2	0	6.2007	3.03553	X	72469693	72471723	+
4:88010758-88013948-	3.16517	6.61888	0.710983	0.804102	up	2	0	6.2007	3.03553	4	88010757	88013948	-
11:21202801-21203106+	3.16517	6.61888	0.710983	0.804102	up	2	0	6.2007	3.03553	11	21202800	21203106	+
X:117599232-117599595+	3.16517	6.61888	0.710983	0.804102	up	2	0	6.2007	3.03553	X	117599231	117599595	+
3:183573396-183581849+	3.16517	6.61888	0.710983	0.804102	up	2	0	6.2007	3.03553	3	183573395	183581849	+
15:42679490-42679636-	3.16517	6.61888	0.710983	0.804102	up	2	0	6.2007	3.03553	15	42679489	42679636	-
17:9946520-9948152-	3.16517	6.61888	0.710983	0.804102	up	2	0	6.2007	3.03553	17	9946519	9948152	-
26:37090451-37093656+	3.16517	6.61888	0.710983	0.804102	up	2	0	6.2007	3.03553	26	37090450	37093656	+
1:266556986-266572400+	3.16517	6.61888	0.710983	0.804102	up	2	0	6.2007	3.03553	1	266556985	266572400	+
3:80575960-80586076+	3.16517	6.61888	0.710983	0.804102	up	2	0	6.2007	3.03553	3	80575959	80586076	+
15:15625018-15626999+	3.16517	6.61888	0.710983	0.804102	up	2	0	6.2007	3.03553	15	15625017	15626999	+
18:31642534-31655250+	3.16517	6.61888	0.710983	0.804102	up	2	0	6.2007	3.03553	18	31642533	31655250	+
2:102433907-102450641-	3.16517	6.61888	0.710983	0.804102	up	2	0	6.2007	3.03553	2	102433906	102450641	-
15:35689458-35689698+	3.16517	6.61888	0.710983	0.804102	up	2	0	6.2007	3.03553	15	35689457	35689698	+
14:52767193-52767704+	3.16517	6.61888	0.710983	0.804102	up	2	0	6.2007	3.03553	14	52767192	52767704	+
1:118519716-118574417+	3.16517	6.61888	0.710983	0.804102	up	2	0	6.2007	3.03553	1	118519715	118574417	+
3:59126949-59131901-	3.16517	6.61888	0.710983	0.804102	up	2	0	6.2007	3.03553	3	59126948	59131901	-
15:30440568-30440983+	3.16517	6.61888	0.710983	0.804102	up	2	0	6.2007	3.03553	15	30440567	30440983	+
6:6438808-6439029-	3.16517	6.61888	0.710983	0.804102	up	2	0	6.2007	3.03553	6	6438807	6439029	-
13:32068475-32074547-	3.16517	6.61888	0.710983	0.804102	up	2	0	6.2007	3.03553	13	32068474	32074547	-
6:94374527-94377073-	3.16517	6.61888	0.710983	0.804102	up	2	0	6.2007	3.03553	6	94374526	94377073	-
19:59224897-59225941-	3.16517	6.61888	0.710983	0.804102	up	2	0	6.2007	3.03553	19	59224896	59225941	-
8:80386443-80405857+	3.16517	6.61888	0.710983	0.804102	up	2	0	6.2007	3.03553	8	80386442	80405857	+
24:14547150-14564885+	3.16517	6.61888	0.710983	0.804102	up	2	0	6.2007	3.03553	24	14547149	14564885	+
4:48377834-48387587-	3.16517	6.61888	0.710983	0.804102	up	2	0	6.2007	3.03553	4	48377833	48387587	-
4:44450597-44450903-	3.16517	6.61888	0.710983	0.804102	up	2	0	6.2007	3.03553	4	44450596	44450903	-
12:62039247-62039465+	3.16517	6.61888	0.710983	0.804102	up	2	0	6.2007	3.03553	12	62039246	62039465	+
17:32035997-32036252+	3.16517	6.61888	0.710983	0.804102	up	2	0	6.2007	3.03553	17	32035996	32036252	+
22:13324869-13410622-	3.16517	6.61888	0.710983	0.804102	up	2	0	6.2007	3.03553	22	13324868	13410622	-
2:84287228-84288947-	3.16517	6.61888	0.710983	0.804102	up	2	0	6.2007	3.03553	2	84287227	84288947	-
9:12908401-12908669-	3.16517	6.61888	0.710983	0.804102	up	2	0	6.2007	3.03553	9	12908400	12908669	-
25:34629596-34630607-	3.16517	6.61888	0.710983	0.804102	up	2	0	6.2007	3.03553	25	34629595	34630607	-
10:31901547-31914634+	3.16517	6.61888	0.710983	0.804102	up	2	0	6.2007	3.03553	10	31901546	31914634	+
7:58013694-58028055-	3.16517	6.61888	0.710983	0.804102	up	2	0	6.2007	3.03553	7	58013693	58028055	-
7:32253114-32257528-	3.16517	6.61888	0.710983	0.804102	up	2	0	6.2007	3.03553	7	32253113	32257528	-
[truncated: 1,044 more rows]
